# Supplementary material for: Direct suppression of host gluconeogenesis by Trypanosoma brucei
Source: Research Square preprint supplement (doi:10.21203/rs.3.rs-8369960/v1), 2026-01-13
Supplement: Supplementary file 1 [file 5b4c4f8700ea726e73028d03.xlsx]

## Sheet: NI_D6
Ensembl_ID	gene_symbol	gene_name	logFC	AveExpr	t	P.Value	adj.P.Val	Status
ENSMUSG00000000001	Gnai3	G protein subunit alpha i3	-0.0662833	4.80911	0	0.999999	1	unchanged
ENSMUSG00000000028	Cdc45	cell division cycle 45	2.0281	0.513625	1.37035	0.0937922	0.683992	unchanged
ENSMUSG00000000031	H19	H19, imprinted maternally expressed transcript	-0.424083	0.899838	0	0.857087	1	unchanged
ENSMUSG00000000049	Apoh	apolipoprotein H	-0.669646	10.2249	0	0.997333	1	unchanged
ENSMUSG00000000056	Narf	nuclear prelamin A recognition factor	-0.565968	2.42242	0	0.940704	1	unchanged
ENSMUSG00000000058	Cav2	caveolin 2	-0.120372	1.67252	0	0.988092	1	unchanged
ENSMUSG00000000078	Klf6	Kruppel-like transcription factor 6	2.0536	4.74854	5.91122	5.86269e-06	0.000339421	upreg
ENSMUSG00000000085	Scmh1	sex comb on midleg homolog 1	-0.10226	3.65085	0	0.999872	1	unchanged
ENSMUSG00000000088	Cox5a	cytochrome c oxidase subunit 5A	-0.884071	8.14167	0	0.826073	1	unchanged
ENSMUSG00000000093	Tbx2	T-box 2	1.28915	2.28783	0.6218	0.270852	1	unchanged
ENSMUSG00000000120	Ngfr	nerve growth factor receptor (TNFR superfamily, member 16)	0.248706	2.64351	0	0.972068	1	unchanged
ENSMUSG00000000127	Fer	FER tyrosine kinase	0.920305	3.03109	0	0.637115	1	unchanged
ENSMUSG00000000131	Xpo6	exportin 6	0.34745	3.93876	0	0.998823	1	unchanged
ENSMUSG00000000134	Tfe3	transcription factor E3	0.319374	4.62625	0	0.999939	1	unchanged
ENSMUSG00000000142	Axin2	axin 2	1.02576	1.20211	0.0453363	0.483217	1	unchanged
ENSMUSG00000000148	Brat1	BRCA1-associated ATM activator 1	0.0624117	0.981139	0	0.991134	1	unchanged
ENSMUSG00000000149	Gna12	guanine nucleotide binding protein, alpha 12	-0.0623589	4.39756	0	0.999981	1	unchanged
ENSMUSG00000000154	Slc22a18	solute carrier family 22 (organic cation transporter), member 18	-0.000972922	6.34426	0	1	1	unchanged
ENSMUSG00000000159	Igsf5	immunoglobulin superfamily, member 5	-0.465798	4.79326	0	0.999281	1	unchanged
ENSMUSG00000000167	Pih1d2	PIH1 domain containing 2	-0.00809789	-0.00160626	0	0.996976	1	unchanged
ENSMUSG00000000168	Dlat	dihydrolipoamide S-acetyltransferase	-1.15527	4.66678	-0.887716	0.193002	1	unchanged
ENSMUSG00000000171	Sdhd	succinate dehydrogenase complex, subunit D, integral membrane protein	-0.515692	4.30563	0	0.842889	1	unchanged
ENSMUSG00000000184	Ccnd2	cyclin D2	0.883253	6.5087	0	0.788947	1	unchanged
ENSMUSG00000000194	Gpr107	G protein-coupled receptor 107	0.882756	4.25979	0	0.733339	1	unchanged
ENSMUSG00000000204	Slfn4	schlafen 4	5.15007	-0.651124	5.29966	2.18795e-05	0.000976693	upreg
ENSMUSG00000000244	Tspan32	tetraspanin 32	2.6988	1.063	2.12822	0.0235406	0.234501	unchanged
ENSMUSG00000000247	Lhx2	LIM homeobox protein 2	-0.422787	2.59061	0	0.967521	1	unchanged
ENSMUSG00000000253	Gmpr	guanosine monophosphate reductase	-1.21058	1.16184	-0.667544	0.256303	1	unchanged
ENSMUSG00000000266	Mid2	midline 2	0.331068	2.11458	0	0.970669	1	unchanged
ENSMUSG00000000275	Trim25	tripartite motif-containing 25	0.567563	6.38508	0	0.995045	1	unchanged
ENSMUSG00000000276	Dgke	diacylglycerol kinase, epsilon	0.556537	0.898573	0	0.796286	1	unchanged
ENSMUSG00000000278	Scpep1	serine carboxypeptidase 1	0.84027	6.17945	0	0.91171	1	unchanged
ENSMUSG00000000282	Mnt	max binding protein	0.554054	3.17209	0	0.97722	1	unchanged
ENSMUSG00000000290	Itgb2	integrin beta 2	3.75513	4.75261	6.13836	3.64569e-06	0.00022774	upreg
ENSMUSG00000000295	Hddc2	HD domain containing 2	1.10222	1.43286	0.243542	0.405164	1	unchanged
ENSMUSG00000000296	Tpd52l1	tumor protein D52-like 1	-0.909672	2.47004	0	0.632328	1	unchanged
ENSMUSG00000000301	Pemt	phosphatidylethanolamine N-methyltransferase	-0.916605	7.96642	0	0.73158	1	unchanged
ENSMUSG00000000303	Cdh1	cadherin 1	-0.75138	5.79015	0	0.879899	1	unchanged
ENSMUSG00000000305	Cdh4	cadherin 4	-1.14134	-0.177914	-0.21387	0.418679	1	unchanged
ENSMUSG00000000317	Bcl6b	B cell CLL/lymphoma 6, member B	2.62625	2.10682	4.26565	0.000216967	0.00570744	upreg
ENSMUSG00000000318	Clec10a	C-type lectin domain family 10, member A	1.06597	1.26501	0.110284	0.458042	1	unchanged
ENSMUSG00000000320	Alox12	arachidonate 12-lipoxygenase	3.27655	2.38876	4.77749	6.87938e-05	0.00238138	upreg
ENSMUSG00000000325	NA	NA	-0.97611	2.04011	0	0.522919	1	unchanged
ENSMUSG00000000326	Comt	catechol-O-methyltransferase	-0.748033	8.23894	0	0.952265	1	unchanged
ENSMUSG00000000339	Rtca	RNA 3'-terminal phosphate cyclase	0.176684	3.65735	0	0.999862	1	unchanged
ENSMUSG00000000340	Dbt	dihydrolipoamide branched chain transacylase E2	-0.452821	5.77765	0	0.99994	1	unchanged
ENSMUSG00000000346	Dazap2	DAZ associated protein 2	0.0227812	7.20582	0	1	1	unchanged
ENSMUSG00000000355	Mcts1	malignant T cell amplified sequence 1	-0.414862	5.53891	0	0.999748	1	unchanged
ENSMUSG00000000374	Trappc10	trafficking protein particle complex 10	-0.207997	3.72749	0	0.999889	1	unchanged
ENSMUSG00000000378	Ccm2	cerebral cavernous malformation 2	-0.0720649	3.90582	0	0.999974	1	unchanged
ENSMUSG00000000384	Tbrg4	transforming growth factor beta regulated gene 4	-0.0837224	4.63612	0	0.999999	1	unchanged
ENSMUSG00000000385	Tmprss2	transmembrane protease, serine 2	1.33008	3.63557	1.17702	0.126999	0.860375	unchanged
ENSMUSG00000000386	Mx1	MX dynamin-like GTPase 1	3.96655	1.42804	4.262	0.000219243	0.00575589	upreg
ENSMUSG00000000399	Ndufa9	NADH:ubiquinone oxidoreductase subunit A9	-0.616276	6.2293	0	0.996317	1	unchanged
ENSMUSG00000000409	Lck	lymphocyte protein tyrosine kinase	3.45606	2.45554	4.84534	5.91631e-05	0.002149	upreg
ENSMUSG00000000420	Galnt1	polypeptide N-acetylgalactosaminyltransferase 1	0.0644537	5.34541	0	0.999999	1	unchanged
ENSMUSG00000000439	Mkrn2	makorin, ring finger protein, 2	-0.113329	3.0211	0	0.999916	1	unchanged
ENSMUSG00000000440	Pparg	peroxisome proliferator activated receptor gamma	-0.0852401	2.99535	0	0.995071	1	unchanged
ENSMUSG00000000441	Raf1	v-raf-leukemia viral oncogene 1	-0.0776272	3.80491	0	0.999844	1	unchanged
ENSMUSG00000000486	Septin1	septin 1	1.27446	0.961995	0.497404	0.31266	1	unchanged
ENSMUSG00000000489	Pdgfb	platelet derived growth factor, B polypeptide	2.87977	1.12971	2.52448	0.010445	0.122984	unchanged
ENSMUSG00000000530	Acvrl1	activin A receptor, type II-like 1	2.39953	3.38613	4.27604	0.000211932	0.00559721	upreg
ENSMUSG00000000531	Tamalin	trafficking regulator and scaffold protein tamalin	0.492078	0.757351	0	0.838495	1	unchanged
ENSMUSG00000000532	Acvr1b	activin A receptor, type 1B	0.32586	2.98292	0	0.991195	1	unchanged
ENSMUSG00000000538	Tom1l2	target of myb1-like 2 (chicken)	-0.321287	4.32581	0	0.999665	1	unchanged
ENSMUSG00000000552	Zfp385a	zinc finger protein 385A	-0.0354524	2.83164	0	0.999409	1	unchanged
ENSMUSG00000000555	Itga5	integrin alpha 5 (fibronectin receptor alpha)	0.191449	1.72337	0	0.967756	1	unchanged
ENSMUSG00000000561	Wdr77	WD repeat domain 77	-0.139172	4.63945	0	0.99999	1	unchanged
ENSMUSG00000000563	Atp5pb	ATP synthase peripheral stalk-membrane subunit b	-0.791438	8.38492	0	0.940354	1	unchanged
ENSMUSG00000000567	Sox9	SRY (sex determining region Y)-box 9	1.00285	5.60354	0.0100165	0.496058	1	unchanged
ENSMUSG00000000568	Hnrnpd	heterogeneous nuclear ribonucleoprotein D	0.402935	4.88683	0	0.999689	1	unchanged
ENSMUSG00000000581	C1d	C1D nuclear receptor co-repressor	-0.168596	5.11338	0	0.999999	1	unchanged
ENSMUSG00000000594	Gm2a	GM2 ganglioside activator protein	-0.679428	7.67879	0	0.988927	1	unchanged
ENSMUSG00000000600	Krit1	KRIT1, ankyrin repeat containing	0.177356	4.01546	0	0.999993	1	unchanged
ENSMUSG00000000605	Clcn4	chloride channel, voltage-sensitive 4	-0.511895	5.90007	0	0.999964	1	unchanged
ENSMUSG00000000628	Hk2	hexokinase 2	3.50176	4.4363	6.45682	1.89281e-06	0.000126105	upreg
ENSMUSG00000000631	Myo18a	myosin XVIIIA	0.215085	6.45934	0	0.999999	1	unchanged
ENSMUSG00000000673	Haao	3-hydroxyanthranilate 3,4-dioxygenase	-1.00736	8.18282	-0.0539612	0.47877	1	unchanged
ENSMUSG00000000682	Cd52	CD52 antigen	3.90053	6.81493	15.3595	2.47376e-12	5.24044e-09	upreg
ENSMUSG00000000686	Abhd15	abhydrolase domain containing 15	-0.183004	2.99223	0	0.998749	1	unchanged
ENSMUSG00000000693	Loxl3	lysyl oxidase-like 3	2.25605	1.55302	2.65981	0.0078201	0.0981667	unchanged
ENSMUSG00000000708	Kat2b	K(lysine) acetyltransferase 2B	-0.5734	5.92641	0	0.99496	1	unchanged
ENSMUSG00000000711	Rab5b	RAB5B, member RAS oncogene family	-0.281156	3.77998	0	0.999648	1	unchanged
ENSMUSG00000000732	Icosl	icos ligand	1.08346	0.692813	0.124606	0.454012	1	unchanged
ENSMUSG00000000738	Spg7	SPG7, paraplegin matrix AAA peptidase subunit	-0.434287	5.04085	0	0.999886	1	unchanged
ENSMUSG00000000739	Sult5a1	sulfotransferase family 5A, member 1	-0.242958	2.95184	0	0.991509	1	unchanged
ENSMUSG00000000740	Rpl13	ribosomal protein L13	-0.0653497	8.49471	0	0.999999	1	unchanged
ENSMUSG00000000743	Chmp1a	charged multivesicular body protein 1A	0.240168	5.73325	0	0.999895	1	unchanged
ENSMUSG00000000751	Rpa1	replication protein A1	-0.0481419	4.63294	0	0.999995	1	unchanged
ENSMUSG00000000753	Serpinf1	serine (or cysteine) peptidase inhibitor, clade F, member 1	-1.573	7.20865	-4.42028	0.000153096	0.00449905	downreg
ENSMUSG00000000759	Tubgcp3	tubulin, gamma complex component 3	0.500751	2.67213	0	0.937873	1	unchanged
ENSMUSG00000000776	Polr3d	polymerase (RNA) III (DNA directed) polypeptide D	0.666266	3.74705	0	0.923429	1	unchanged
ENSMUSG00000000782	Tcf7	transcription factor 7, T cell specific	0.219541	1.62516	0	0.970157	1	unchanged
ENSMUSG00000000787	Ddx3x	DEAD box helicase 3, X-linked	-0.128897	7.26165	0	0.999999	1	unchanged
ENSMUSG00000000791	Il12rb1	interleukin 12 receptor, beta 1	3.36958	1.22416	3.73063	0.000728826	0.0153737	upreg
ENSMUSG00000000804	Usp32	ubiquitin specific peptidase 32	-0.217918	4.01383	0	0.999981	1	unchanged
ENSMUSG00000000811	Txnrd3	thioredoxin reductase 3	-1.39637	2.04616	-1.25265	0.11291	0.786222	unchanged
ENSMUSG00000000823	Zfp512b	zinc finger protein 512B	-0.0917768	3.33284	0	0.999702	1	unchanged
ENSMUSG00000000826	Dnajc5	DnaJ heat shock protein family (Hsp40) member C5	-0.027104	5.7997	0	1	1	unchanged
ENSMUSG00000000827	Tpd52l2	tumor protein D52-like 2	-0.0358005	4.6079	0	0.999998	1	unchanged
ENSMUSG00000000838	Fmr1	fragile X messenger ribonucleoprotein 1	-0.0872908	3.82884	0	0.999966	1	unchanged
ENSMUSG00000000861	Bcl11a	BCL11 transcription factor A	0.891073	0.374898	0	0.57025	1	unchanged
ENSMUSG00000000876	Pxmp4	peroxisomal membrane protein 4	-0.753494	6.7894	0	0.974152	1	unchanged
ENSMUSG00000000881	Dlg3	discs large MAGUK scaffold protein 3	-0.561201	4.10669	0	0.996596	1	unchanged
ENSMUSG00000000884	Gnb1l	guanine nucleotide binding protein (G protein), beta polypeptide 1-like	-0.177932	0.748181	0	0.980636	1	unchanged
ENSMUSG00000000901	Mmp11	matrix metallopeptidase 11	-0.371826	-0.762851	0	0.824385	1	unchanged
ENSMUSG00000000902	Smarcb1	SWI/SNF related, matrix associated, actin dependent regulator of chromatin, subfamily b, member 1	0.241947	4.27022	0	0.999875	1	unchanged
ENSMUSG00000000915	Hip1r	huntingtin interacting protein 1 related	0.725139	4.01512	0	0.918114	1	unchanged
ENSMUSG00000000916	Nsun5	NOL1/NOP2/Sun domain family, member 5	-0.576491	2.49799	0	0.964482	1	unchanged
ENSMUSG00000000934	Top1mt	DNA topoisomerase 1, mitochondrial	-0.28712	3.44255	0	0.999391	1	unchanged
ENSMUSG00000000957	Mmp14	matrix metallopeptidase 14 (membrane-inserted)	1.18627	6.7526	1.0551	0.152432	0.979139	unchanged
ENSMUSG00000000958	Slc7a7	solute carrier family 7 (cationic amino acid transporter, y+ system), member 7	1.50756	3.28961	2.03878	0.0279555	0.269161	unchanged
ENSMUSG00000000959	Oxa1l	oxidase assembly 1-like	-0.393043	5.03315	0	0.999965	1	unchanged
ENSMUSG00000000976	Heatr6	HEAT repeat containing 6	0.0455871	3.55807	0	0.999977	1	unchanged
ENSMUSG00000000982	Ccl3	C-C motif chemokine ligand 3	4.2363	0.0276282	2.33464	0.0161132	0.17388	unchanged
ENSMUSG00000000983	Wfdc18	WAP four-disulfide core domain 18	2.86473	-0.604024	2.13445	0.0233099	0.232537	unchanged
ENSMUSG00000001016	Ilf2	interleukin enhancer binding factor 2	-0.0799131	3.36103	0	0.999856	1	unchanged
ENSMUSG00000001017	Chtop	chromatin target of PRMT1	-0.00407751	5.35095	0	1	1	unchanged
ENSMUSG00000001018	Snapin	SNAP-associated protein	-0.0827367	3.7377	0	0.999614	1	unchanged
ENSMUSG00000001020	S100a4	S100 calcium binding protein A4	4.0625	3.05335	4.52817	0.000120372	0.00371139	upreg
ENSMUSG00000001025	S100a6	S100 calcium binding protein A6 (calcyclin)	2.55806	4.38415	4.0596	0.000345717	0.00850374	upreg
ENSMUSG00000001029	Icam2	intercellular adhesion molecule 2	1.56262	3.8404	2.76216	0.00627637	0.0822253	unchanged
ENSMUSG00000001034	Mapk7	mitogen-activated protein kinase 7	0.234721	2.06492	0	0.977585	1	unchanged
ENSMUSG00000001036	Epn2	epsin 2	0.306067	3.07638	0	0.997857	1	unchanged
ENSMUSG00000001039	B9d1	B9 protein domain 1	1.50302	-0.339058	0.747019	0.232936	1	unchanged
ENSMUSG00000001052	Sec24b	SEC24 homolog B, COPII coat complex component	0.223855	3.74321	0	0.999784	1	unchanged
ENSMUSG00000001053	N4bp3	NEDD4 binding protein 3	-0.306878	1.18227	0	0.941379	1	unchanged
ENSMUSG00000001054	Rmnd5b	required for meiotic nuclear division 5 homolog B	0.037096	3.68885	0	0.999976	1	unchanged
ENSMUSG00000001056	Nhp2	NHP2 ribonucleoprotein	-0.296191	4.28829	0	0.999972	1	unchanged
ENSMUSG00000001062	Vps9d1	VPS9 domain containing 1	-0.0253921	3.53913	0	0.999962	1	unchanged
ENSMUSG00000001065	Zfp276	zinc finger protein (C2H2 type) 276	0.108707	3.56734	0	0.999908	1	unchanged
ENSMUSG00000001082	Mfsd10	major facilitator superfamily domain containing 10	1.27222	2.6881	0.902027	0.189276	1	unchanged
ENSMUSG00000001089	Luzp1	leucine zipper protein 1	0.361142	4.64077	0	0.999697	1	unchanged
ENSMUSG00000001095	Slc13a2	solute carrier family 13 (sodium-dependent dicarboxylate transporter), member 2	-2.65796	-0.0717775	-3.49859	0.00122942	0.0231201	downreg
ENSMUSG00000001098	Kctd10	potassium channel tetramerisation domain containing 10	0.579293	3.50057	0	0.97782	1	unchanged
ENSMUSG00000001100	Poldip2	polymerase (DNA-directed), delta interacting protein 2	-0.64391	5.7754	0	0.998291	1	unchanged
ENSMUSG00000001105	Ift20	intraflagellar transport 20	-0.147789	7.97894	0	1	1	unchanged
ENSMUSG00000001119	Col6a1	collagen, type VI, alpha 1	0.910626	1.87421	0	0.581972	1	unchanged
ENSMUSG00000001120	Pcbp3	poly(rC) binding protein 3	0.390732	-0.285541	0	0.853546	1	unchanged
ENSMUSG00000001123	Lgals9	lectin, galactose binding, soluble 9	0.185288	8.6716	0	0.999961	1	unchanged
ENSMUSG00000001127	Araf	Araf proto-oncogene, serine/threonine kinase	0.157696	5.38721	0	1	1	unchanged
ENSMUSG00000001128	Cfp	complement factor properdin	1.93759	6.23488	4.38562	0.000165523	0.00471937	upreg
ENSMUSG00000001131	Timp1	tissue inhibitor of metalloproteinase 1	3.90004	0.0434032	3.39495	0.00156034	0.0275093	upreg
ENSMUSG00000001134	Uxt	ubiquitously expressed prefoldin like chaperone	-0.290281	3.93295	0	0.999965	1	unchanged
ENSMUSG00000001138	Cnnm3	cyclin M3	-0.516171	3.94629	0	0.994132	1	unchanged
ENSMUSG00000001143	Lman2l	lectin, mannose-binding 2-like	0.117942	3.65692	0	0.999695	1	unchanged
ENSMUSG00000001150	Mcm3ap	minichromosome maintenance complex component 3 associated protein	0.10825	3.8776	0	0.99999	1	unchanged
ENSMUSG00000001151	Pcnt	pericentrin (kendrin)	0.095043	3.68133	0	0.999865	1	unchanged
ENSMUSG00000001155	Ftcd	formiminotransferase cyclodeaminase	-0.756958	8.42673	0	0.914214	1	unchanged
ENSMUSG00000001156	Mxd1	MAX dimerization protein 1	1.38088	3.17944	1.10624	0.141349	0.925894	unchanged
ENSMUSG00000001157	Gmcl1	germ cell-less, spermatogenesis associated 1	0.0761263	4.15147	0	0.999917	1	unchanged
ENSMUSG00000001158	Snrnp27	small nuclear ribonucleoprotein 27 (U4/U6.U5)	0.378896	5.15494	0	0.999945	1	unchanged
ENSMUSG00000001166	Oas1c	2'-5' oligoadenylate synthetase 1C	1.08843	-0.276645	0.11122	0.464705	1	unchanged
ENSMUSG00000001173	Ocrl	OCRL, inositol polyphosphate-5-phosphatase	0.615588	2.89077	0	0.920506	1	unchanged
ENSMUSG00000001175	Calm1	calmodulin 1	0.42364	9.62574	0	0.999994	1	unchanged
ENSMUSG00000001211	Agpat3	1-acylglycerol-3-phosphate O-acyltransferase 3	-0.493779	6.73277	0	0.999938	1	unchanged
ENSMUSG00000001227	Sema6b	sema domain, transmembrane domain (TM), and cytoplasmic domain, (semaphorin) 6B	0.463861	1.87883	0	0.92667	1	unchanged
ENSMUSG00000001228	Uhrf1	ubiquitin-like, containing PHD and RING finger domains, 1	2.90393	1.27286	2.70235	0.0071515	0.0910802	unchanged
ENSMUSG00000001229	Dpp9	dipeptidylpeptidase 9	0.611886	5.74838	0	0.992546	1	unchanged
ENSMUSG00000001240	Ramp2	receptor (calcitonin) activity modifying protein 2	1.09407	3.88671	0.444718	0.330822	1	unchanged
ENSMUSG00000001247	Lsr	lipolysis stimulated lipoprotein receptor	0.0802048	8.48973	0	0.999868	1	unchanged
ENSMUSG00000001248	Gramd1a	GRAM domain containing 1A	0.681597	3.23383	0	0.935664	1	unchanged
ENSMUSG00000001249	Hpn	hepsin	-0.201247	7.25241	0	1	1	unchanged
ENSMUSG00000001270	Ckb	creatine kinase, brain	1.93035	3.94357	3.95093	0.000442137	0.0104203	upreg
ENSMUSG00000001280	Sp1	trans-acting transcription factor 1	0.103172	5.60421	0	1	1	unchanged
ENSMUSG00000001281	Itgb7	integrin beta 7	3.64908	2.77191	4.32926	0.000188148	0.00514556	upreg
ENSMUSG00000001285	Myg1	melanocyte proliferating gene 1	0.0364383	3.93332	0	0.999998	1	unchanged
ENSMUSG00000001288	Rarg	retinoic acid receptor, gamma	-0.184419	2.74025	0	0.993305	1	unchanged
ENSMUSG00000001289	Pfdn5	prefoldin 5	-0.14092	6.49594	0	1	1	unchanged
ENSMUSG00000001300	Efnb2	ephrin B2	-1.53856	-0.260918	-0.691666	0.250934	1	unchanged
ENSMUSG00000001305	Rrp15	ribosomal RNA processing 15 homolog	-0.0473552	3.59458	0	0.999939	1	unchanged
ENSMUSG00000001313	Rnd2	Rho family GTPase 2	-0.57857	4.57947	0	0.983796	1	unchanged
ENSMUSG00000001323	Srr	serine racemase	-0.622851	6.01368	0	0.992443	1	unchanged
ENSMUSG00000001334	Fndc5	fibronectin type III domain containing 5	-0.0737319	-0.370494	0	0.971812	1	unchanged
ENSMUSG00000001348	Acp5	acid phosphatase 5, tartrate resistant	-0.406273	6.74795	0	0.999729	1	unchanged
ENSMUSG00000001366	Fbxo9	f-box protein 9	-0.595674	5.5731	0	0.998949	1	unchanged
ENSMUSG00000001376	Vps50	VPS50 EARP/GARPII complex subunit	-0.181657	3.1861	0	0.999921	1	unchanged
ENSMUSG00000001380	Hars1	histidyl-tRNA synthetase 1	-0.130565	4.49834	0	0.999997	1	unchanged
ENSMUSG00000001383	Zmat2	zinc finger, matrin type 2	0.126178	5.95973	0	1	1	unchanged
ENSMUSG00000001403	Ube2c	ubiquitin-conjugating enzyme E2C	2.32135	3.36203	2.19242	0.0206417	0.211001	unchanged
ENSMUSG00000001415	Smg5	SMG5 nonsense mediated mRNA decay factor	0.14248	3.32446	0	0.999846	1	unchanged
ENSMUSG00000001416	Cct3	chaperonin containing TCP1 subunit 3	0.287958	6.72875	0	0.999988	1	unchanged
ENSMUSG00000001418	Glmp	glycosylated lysosomal membrane protein	0.203042	5.33493	0	1	1	unchanged
ENSMUSG00000001419	Mef2d	myocyte enhancer factor 2D	-0.0210262	4.58084	0	0.999986	1	unchanged
ENSMUSG00000001420	Tmem79	transmembrane protein 79	-0.286168	0.183584	0	0.904316	1	unchanged
ENSMUSG00000001424	Snd1	staphylococcal nuclease and tudor domain containing 1	-0.16396	6.41976	0	0.999999	1	unchanged
ENSMUSG00000001435	Col18a1	collagen, type XVIII, alpha 1	-0.486294	8.45764	0	0.999954	1	unchanged
ENSMUSG00000001436	Slc19a1	solute carrier family 19 (folate transporter), member 1	-0.952828	2.38593	0	0.566735	1	unchanged
ENSMUSG00000001440	Kpnb1	karyopherin subunit beta 1	0.052253	6.00586	0	1	1	unchanged
ENSMUSG00000001441	Npepps	aminopeptidase puromycin sensitive	0.144148	4.7851	0	0.999997	1	unchanged
ENSMUSG00000001444	Tbx21	T-box 21	4.77273	-0.232009	4.36974	0.000172746	0.00489374	upreg
ENSMUSG00000001445	Mrpl10	mitochondrial ribosomal protein L10	-0.123541	5.12284	0	0.999998	1	unchanged
ENSMUSG00000001467	Cyp51	cytochrome P450, family 51	-0.318975	7.36787	0	0.991361	1	unchanged
ENSMUSG00000001472	Tcf25	transcription factor 25 (basic helix-loop-helix)	-0.0795953	6.97631	0	1	1	unchanged
ENSMUSG00000001473	Tubb6	tubulin, beta 6 class V	0.977338	3.61725	0	0.52374	1	unchanged
ENSMUSG00000001482	Def8	differentially expressed in FDCP 8	-0.462754	4.97374	0	0.995632	1	unchanged
ENSMUSG00000001506	Col1a1	collagen, type I, alpha 1	2.00005	4.43897	2.56467	0.00957211	0.115265	unchanged
ENSMUSG00000001507	Itga3	integrin alpha 3	0.0340849	1.52275	0	0.999007	1	unchanged
ENSMUSG00000001517	Foxm1	forkhead box M1	3.2284	1.32905	2.27277	0.0177344	0.187798	unchanged
ENSMUSG00000001518	Itfg2	integrin alpha FG-GAP repeat containing 2	-0.16719	3.08087	0	0.999096	1	unchanged
ENSMUSG00000001521	Tulp3	TUB like protein 3	1.28887	0.318659	0.487165	0.316454	1	unchanged
ENSMUSG00000001524	Gtf2h4	general transcription factor II H, polypeptide 4	-0.086368	3.32112	0	0.999733	1	unchanged
ENSMUSG00000001525	Tubb5	tubulin, beta 5 class I	0.940608	7.42023	0	0.669447	1	unchanged
ENSMUSG00000001542	Ell2	elongation factor for RNA polymerase II 2	-0.555189	5.29189	0	0.991321	1	unchanged
ENSMUSG00000001552	Jup	junction plakoglobin	0.351178	4.37225	0	0.999156	1	unchanged
ENSMUSG00000001555	Fkbp10	FK506 binding protein 10	2.29728	-0.146194	1.67426	0.0556106	0.456821	unchanged
ENSMUSG00000001569	Nom1	nucleolar protein with MIF4G domain 1	-0.185188	4.10428	0	0.999976	1	unchanged
ENSMUSG00000001576	Ergic1	endoplasmic reticulum-golgi intermediate compartment 1	-0.928653	6.02195	0	0.710151	1	unchanged
ENSMUSG00000001588	Acap1	ArfGAP with coiled-coil, ankyrin repeat and PH domains 1	1.22226	0.601799	0.351543	0.365747	1	unchanged
ENSMUSG00000001604	Tcea3	transcription elongation factor A (SII), 3	-0.681609	5.88692	0	0.960332	1	unchanged
ENSMUSG00000001627	Ifrd1	interferon-related developmental regulator 1	0.836972	5.09865	0	0.782047	1	unchanged
ENSMUSG00000001630	Stk38l	serine/threonine kinase 38 like	0.297183	3.758	0	0.992755	1	unchanged
ENSMUSG00000001632	Brpf1	bromodomain and PHD finger containing, 1	0.463821	4.07134	0	0.99461	1	unchanged
ENSMUSG00000001642	Akr1b1	aldo-keto reductase family 1 member B	1.32737	0.0728899	0.482016	0.319148	1	unchanged
ENSMUSG00000001663	Gstt1	glutathione S-transferase, theta 1	-1.39395	6.99801	-2.66081	0.00780259	0.0980538	unchanged
ENSMUSG00000001665	Gstt3	glutathione S-transferase, theta 3	-1.59622	5.56868	-2.40065	0.013492	0.151848	unchanged
ENSMUSG00000001666	Ddt	D-dopachrome tautomerase	-1.10267	8.57923	-0.781897	0.222047	1	unchanged
ENSMUSG00000001670	Tat	tyrosine aminotransferase	-0.118306	7.52326	0	0.999122	1	unchanged
ENSMUSG00000001672	Marveld3	MARVEL (membrane-associating) domain containing 3	-0.334209	-0.270626	0	0.877834	1	unchanged
ENSMUSG00000001674	Ddx18	DEAD box helicase 18	0.0794682	4.33373	0	0.999958	1	unchanged
ENSMUSG00000001687	Ubl3	ubiquitin-like 3	0.215235	6.21086	0	0.999999	1	unchanged
ENSMUSG00000001700	Gramd2b	GRAM domain containing 2B	-0.294533	5.11501	0	0.999803	1	unchanged
ENSMUSG00000001707	Eef1e1	eukaryotic translation elongation factor 1 epsilon 1	0.219829	2.44458	0	0.994379	1	unchanged
ENSMUSG00000001729	Akt1	thymoma viral proto-oncogene 1	0.630202	6.52019	0	0.990625	1	unchanged
ENSMUSG00000001739	Cldn15	claudin 15	1.74365	-0.603942	0.887477	0.195099	1	unchanged
ENSMUSG00000001741	Il16	interleukin 16	0.498757	2.99007	0	0.897423	1	unchanged
ENSMUSG00000001750	Tcirg1	T cell, immune regulator 1, ATPase, H+ transporting, lysosomal V0 protein A3	1.57068	5.61703	4.47006	0.000136875	0.0040956	upreg
ENSMUSG00000001751	Naglu	alpha-N-acetylglucosaminidase (Sanfilippo disease IIIB)	0.201958	4.73341	0	0.999997	1	unchanged
ENSMUSG00000001755	Coasy	Coenzyme A synthase	-0.603032	6.78367	0	0.998752	1	unchanged
ENSMUSG00000001761	Smo	smoothened, frizzled class receptor	0.42143	0.646856	0	0.916679	1	unchanged
ENSMUSG00000001763	Tspan33	tetraspanin 33	-1.13084	2.92932	-0.555951	0.292428	1	unchanged
ENSMUSG00000001767	Crnkl1	crooked neck pre-mRNA splicing factor 1	-0.0424939	3.48855	0	0.999986	1	unchanged
ENSMUSG00000001768	Rin2	Ras and Rab interactor 2	-0.0433655	3.49587	0	0.999448	1	unchanged
ENSMUSG00000001774	Chordc1	cysteine and histidine rich domain containing 1	0.0967462	6.13953	0	0.999994	1	unchanged
ENSMUSG00000001783	Rtcb	RNA 2',3'-cyclic phosphate and 5'-OH ligase	0.0416121	5.73889	0	1	1	unchanged
ENSMUSG00000001785	Pwp1	PWP1 homolog, endonuclein	0.129645	4.20315	0	0.999981	1	unchanged
ENSMUSG00000001786	Fbxo7	F-box protein 7	0.125381	4.78201	0	0.999998	1	unchanged
ENSMUSG00000001794	Capns1	calpain, small subunit 1	0.386856	7.21496	0	0.99999	1	unchanged
ENSMUSG00000001802	Lrp3	low density lipoprotein receptor-related protein 3	-0.694275	2.3136	0	0.871628	1	unchanged
ENSMUSG00000001829	Clpb	ClpB caseinolytic peptidase B	-0.765346	4.89215	0	0.950393	1	unchanged
ENSMUSG00000001833	Septin7	septin 7	0.269442	6.23815	0	0.999995	1	unchanged
ENSMUSG00000001844	Zdhhc4	zinc finger, DHHC domain containing 4	-0.68871	4.793	0	0.984735	1	unchanged
ENSMUSG00000001847	Rac1	Rac family small GTPase 1	0.100506	7.39341	0	1	1	unchanged
ENSMUSG00000001855	Nup214	nucleoporin 214	0.296121	3.60257	0	0.997998	1	unchanged
ENSMUSG00000001870	Ltbp1	latent transforming growth factor beta binding protein 1	0.928962	1.32436	0	0.563572	1	unchanged
ENSMUSG00000001891	Ugp2	UDP-glucose pyrophosphorylase 2	-0.573004	6.93695	0	0.995878	1	unchanged
ENSMUSG00000001909	Trmt1	tRNA methyltransferase 1	0.0922439	4.21307	0	0.999998	1	unchanged
ENSMUSG00000001910	Nacc1	nucleus accumbens associated 1, BEN and BTB (POZ) domain containing	0.5509	3.80934	0	0.978753	1	unchanged
ENSMUSG00000001911	Nfix	nuclear factor I/X	-0.775467	6.68658	0	0.964192	1	unchanged
ENSMUSG00000001918	Slc1a5	solute carrier family 1 (neutral amino acid transporter), member 5	1.41489	2.62723	1.0594	0.15148	0.973968	unchanged
ENSMUSG00000001924	Uba1	ubiquitin-like modifier activating enzyme 1	0.333837	8.00616	0	0.999999	1	unchanged
ENSMUSG00000001930	Vwf	Von Willebrand factor	-0.32557	1.82162	0	0.974566	1	unchanged
ENSMUSG00000001942	Siae	sialic acid acetylesterase	-0.259855	5.07289	0	0.999972	1	unchanged
ENSMUSG00000001946	Esam	endothelial cell-specific adhesion molecule	1.21761	4.66808	0.958812	0.174963	1	unchanged
ENSMUSG00000001948	Spa17	sperm autoantigenic protein 17	0.644379	1.08139	0	0.75769	1	unchanged
ENSMUSG00000001962	Fam50a	family with sequence similarity 50, member A	-0.0480165	3.91753	0	0.999954	1	unchanged
ENSMUSG00000001964	Emd	emerin	0.132223	4.4125	0	0.999996	1	unchanged
ENSMUSG00000001983	Taco1	translational activator of mitochondrially encoded cytochrome c oxidase I	-0.429163	1.87207	0	0.976329	1	unchanged
ENSMUSG00000001986	Gria3	glutamate receptor, ionotropic, AMPA3 (alpha 3)	-2.10316	-0.346476	-1.48513	0.0773774	0.590923	unchanged
ENSMUSG00000001995	Sipa1l2	signal-induced proliferation-associated 1 like 2	0.244001	2.03866	0	0.974788	1	unchanged
ENSMUSG00000001998	Ap4e1	adaptor-related protein complex AP-4, epsilon 1	0.00664039	1.27204	0	0.999502	1	unchanged
ENSMUSG00000001999	Blvra	biliverdin reductase A	0.825773	4.65207	0	0.858176	1	unchanged
ENSMUSG00000002010	Idh3g	isocitrate dehydrogenase 3 (NAD+), gamma	-0.391547	5.66928	0	0.999989	1	unchanged
ENSMUSG00000002014	Ssr4	signal sequence receptor, delta	-0.340844	7.85198	0	0.999999	1	unchanged
ENSMUSG00000002015	Bcap31	B cell receptor associated protein 31	-0.404226	6.62812	0	0.999927	1	unchanged
ENSMUSG00000002017	Fam98a	family with sequence similarity 98, member A	0.168728	3.69909	0	0.999922	1	unchanged
ENSMUSG00000002028	Kmt2a	lysine (K)-specific methyltransferase 2A	0.332319	5.11595	0	0.999743	1	unchanged
ENSMUSG00000002031	Ift46	intraflagellar transport 46	-0.403993	3.64288	0	0.998834	1	unchanged
ENSMUSG00000002032	Tmem25	transmembrane protein 25	-1.01263	4.15964	-0.0703032	0.472351	1	unchanged
ENSMUSG00000002033	Cd3g	CD3 antigen, gamma polypeptide	2.02041	0.652279	1.67316	0.0555445	0.456821	unchanged
ENSMUSG00000002043	Trappc6a	trafficking protein particle complex 6A	-0.441971	4.01185	0	0.998106	1	unchanged
ENSMUSG00000002052	Supt6	SPT6, histone chaperone and transcription elongation factor	0.208676	5.11746	0	0.999748	1	unchanged
ENSMUSG00000002055	Spag5	sperm associated antigen 5	1.96706	1.2937	1.31976	0.101802	0.726032	unchanged
ENSMUSG00000002058	Unc119	unc-119 lipid binding chaperone	0.0625378	3.39822	0	0.999886	1	unchanged
ENSMUSG00000002059	Rab34	RAB34, member RAS oncogene family	-0.852011	2.32309	0	0.718915	1	unchanged
ENSMUSG00000002064	Sdf2	stromal cell derived factor 2	0.142574	5.33127	0	0.999989	1	unchanged
ENSMUSG00000002068	Ccne1	cyclin E1	2.04458	2.00987	1.74968	0.0483434	0.412708	unchanged
ENSMUSG00000002076	Hsf2bp	heat shock transcription factor 2 binding protein	0.560848	-0.502294	0	0.737112	1	unchanged
ENSMUSG00000002083	Bbc3	BCL2 binding component 3	-0.21808	3.54374	0	0.98168	1	unchanged
ENSMUSG00000002102	Psmc3	proteasome (prosome, macropain) 26S subunit, ATPase 3	0.504833	7.26666	0	0.999961	1	unchanged
ENSMUSG00000002103	Acp2	acid phosphatase 2, lysosomal	0.736509	6.37026	0	0.959514	1	unchanged
ENSMUSG00000002105	Slc39a13	solute carrier family 39 (metal ion transporter), member 13	0.594116	3.26352	0	0.940446	1	unchanged
ENSMUSG00000002107	Celf2	CUGBP, Elav-like family member 2	1.00089	6.29037	0.00631322	0.497515	1	unchanged
ENSMUSG00000002108	Nr1h3	nuclear receptor subfamily 1, group H, member 3	0.381515	6.91095	0	0.999969	1	unchanged
ENSMUSG00000002109	Ddb2	damage specific DNA binding protein 2	-1.00667	1.11273	-0.0211914	0.491661	1	unchanged
ENSMUSG00000002111	Spi1	Spi-1 proto-oncogene	3.25561	4.71439	6.72289	1.10607e-06	8.52577e-05	upreg
ENSMUSG00000002129	Sf3a1	splicing factor 3a, subunit 1	0.368576	4.6418	0	0.999907	1	unchanged
ENSMUSG00000002147	Stat6	signal transducer and activator of transcription 6	0.403737	4.98946	0	0.999946	1	unchanged
ENSMUSG00000002204	Napsa	napsin A aspartic peptidase	3.22126	2.33363	3.19821	0.00241359	0.0385928	upreg
ENSMUSG00000002205	Vrk3	vaccinia related kinase 3	0.243652	4.71625	0	0.999681	1	unchanged
ENSMUSG00000002210	Smg9	SMG9 nonsense mediated mRNA decay factor	0.379062	2.1584	0	0.966038	1	unchanged
ENSMUSG00000002221	Paxip1	PAX interacting (with transcription-activation domain) protein 1	-0.411444	3.03773	0	0.989301	1	unchanged
ENSMUSG00000002222	Rmnd5a	required for meiotic nuclear division 5 homolog A	-1.0392	5.49877	-0.247027	0.403794	1	unchanged
ENSMUSG00000002227	Mov10	Mov10 RISC complex RNA helicase	1.30946	3.70302	1.34321	0.0976645	0.704481	unchanged
ENSMUSG00000002228	Ppm1j	protein phosphatase 1J	1.91845	-0.850625	0.784615	0.232395	1	unchanged
ENSMUSG00000002233	Rhoc	ras homolog family member C	1.88562	5.32894	3.74503	0.000704675	0.0150687	upreg
ENSMUSG00000002249	Tead3	TEA domain family member 3	-0.5769	1.70064	0	0.918499	1	unchanged
ENSMUSG00000002250	Ppard	peroxisome proliferator activator receptor delta	0.172301	3.02605	0	0.989942	1	unchanged
ENSMUSG00000002257	Def6	differentially expressed in FDCP 6	4.12522	0.577901	2.98722	0.00389572	0.0556568	unchanged
ENSMUSG00000002265	Peg3	paternally expressed 3	-0.105724	2.20395	0	0.996984	1	unchanged
ENSMUSG00000002274	Metrn	meteorin, glial cell differentiation regulator	-0.597224	0.937982	0	0.860415	1	unchanged
ENSMUSG00000002279	Lmf1	lipase maturation factor 1	-0.246673	4.99833	0	0.999913	1	unchanged
ENSMUSG00000002280	Ciao3	cytosolic iron-sulfur assembly component 3	-0.42417	3.76059	0	0.998925	1	unchanged
ENSMUSG00000002289	Angptl4	angiopoietin-like 4	-0.989679	5.10183	0	0.510088	1	unchanged
ENSMUSG00000002297	Dbf4	DBF4 zinc finger	0.624871	2.24695	0	0.871365	1	unchanged
ENSMUSG00000002307	Daxx	Fas death domain-associated protein	1.37764	4.73693	1.91527	0.0354644	0.326519	unchanged
ENSMUSG00000002308	Cd320	CD320 antigen	0.136857	2.05517	0	0.994072	1	unchanged
ENSMUSG00000002319	Ipo4	importin 4	-0.0468849	3.91833	0	0.999997	1	unchanged
ENSMUSG00000002320	Tm9sf1	transmembrane 9 superfamily member 1	-0.157944	1.04642	0	0.969008	1	unchanged
ENSMUSG00000002324	Rec8	REC8 meiotic recombination protein	0.869575	-0.825793	0	0.57913	1	unchanged
ENSMUSG00000002325	Irf9	interferon regulatory factor 9	0.78914	5.71091	0	0.945212	1	unchanged
ENSMUSG00000002326	Gmpr2	guanosine monophosphate reductase 2	0.106869	3.24582	0	0.999605	1	unchanged
ENSMUSG00000002329	Mdp1	magnesium-dependent phosphatase 1	-0.335939	4.59258	0	0.99977	1	unchanged
ENSMUSG00000002332	Dhrs1	dehydrogenase/reductase 1	-0.752111	7.82911	0	0.981141	1	unchanged
ENSMUSG00000002342	Tmem161a	transmembrane protein 161A	0.00185319	3.80731	0	1	1	unchanged
ENSMUSG00000002343	Armc6	armadillo repeat containing 6	-0.599258	1.82072	0	0.865897	1	unchanged
ENSMUSG00000002345	Borcs8	BLOC-1 related complex subunit 8	-0.191275	3.98816	0	0.999694	1	unchanged
ENSMUSG00000002346	Slc25a42	solute carrier family 25, member 42	-0.97927	3.93775	0	0.546056	1	unchanged
ENSMUSG00000002365	Snx9	sorting nexin 9	0.334851	0.145405	0	0.886077	1	unchanged
ENSMUSG00000002372	Ranbp3	RAN binding protein 3	-0.155855	4.22259	0	0.999986	1	unchanged
ENSMUSG00000002379	Ndufa11	NADH:ubiquinone oxidoreductase subunit A11	-0.450133	6.86099	0	0.999968	1	unchanged
ENSMUSG00000002393	Nr2f6	nuclear receptor subfamily 2, group F, member 6	-0.489721	5.90502	0	0.999748	1	unchanged
ENSMUSG00000002395	Use1	unconventional SNARE in the ER 1 homolog (S. cerevisiae)	-0.251193	6.54647	0	0.999998	1	unchanged
ENSMUSG00000002396	Ocel1	occludin/ELL domain containing 1	-0.184892	3.06547	0	0.999566	1	unchanged
ENSMUSG00000002409	Dyrk1b	dual-specificity tyrosine phosphorylation regulated kinase 1b	-0.382894	0.295355	0	0.911457	1	unchanged
ENSMUSG00000002413	Braf	Braf transforming gene	0.118392	4.16498	0	0.999554	1	unchanged
ENSMUSG00000002416	Ndufb2	NADH:ubiquinone oxidoreductase subunit B2	-0.684237	6.82937	0	0.988196	1	unchanged
ENSMUSG00000002428	Hltf	helicase-like transcription factor	0.62002	3.07823	0	0.909972	1	unchanged
ENSMUSG00000002455	Prpf6	pre-mRNA splicing factor 6	-0.389609	5.52199	0	0.999863	1	unchanged
ENSMUSG00000002458	Rgs19	regulator of G-protein signaling 19	2.55921	2.79218	3.35977	0.00167949	0.0288428	upreg
ENSMUSG00000002475	Abhd3	abhydrolase domain containing 3	-0.614889	4.49509	0	0.985253	1	unchanged
ENSMUSG00000002477	Snrpd1	small nuclear ribonucleoprotein D1	0.729552	5.49368	0	0.96536	1	unchanged
ENSMUSG00000002486	Tchp	trichoplein, keratin filament binding	0.575283	1.58012	0	0.852332	1	unchanged
ENSMUSG00000002489	Tiam1	T cell lymphoma invasion and metastasis 1	-0.574696	0.37636	0	0.758053	1	unchanged
ENSMUSG00000002496	Tsc2	TSC complex subunit 2	-0.24958	3.47396	0	0.99926	1	unchanged
ENSMUSG00000002504	Nherf2	NHERF family PDZ scaffold protein 2	-0.972542	4.15645	0	0.564105	1	unchanged
ENSMUSG00000002524	Puf60	poly-U binding splicing factor 60	0.207134	6.38006	0	1	1	unchanged
ENSMUSG00000002546	Golga2	golgin A2	0.0171119	5.24196	0	1	1	unchanged
ENSMUSG00000002550	Uck1	uridine-cytidine kinase 1	-1.05803	4.46967	-0.314619	0.378273	1	unchanged
ENSMUSG00000002578	Ikzf4	IKAROS family zinc finger 4	-0.624405	0.893879	0	0.717041	1	unchanged
ENSMUSG00000002580	Mien1	migration and invasion enhancer 1	-0.364292	6.15135	0	0.999971	1	unchanged
ENSMUSG00000002588	Pon1	paraoxonase 1	-0.976479	9.12084	0	0.56474	1	unchanged
ENSMUSG00000002602	Axl	AXL receptor tyrosine kinase	1.84682	6.0694	4.94511	4.73998e-05	0.00181626	upreg
ENSMUSG00000002603	Tgfb1	transforming growth factor, beta 1	1.78148	2.60922	1.73649	0.0494916	0.420885	unchanged
ENSMUSG00000002608	Ccdc97	coiled-coil domain containing 97	0.221167	4.69387	0	0.999999	1	unchanged
ENSMUSG00000002617	Zfp40	zinc finger protein 40	0.100809	0.568351	0	0.984615	1	unchanged
ENSMUSG00000002625	Akap8l	A kinase anchor protein 8-like	-0.309393	3.55761	0	0.995381	1	unchanged
ENSMUSG00000002635	Pdcd2l	programmed cell death 2-like	0.0770645	3.32737	0	0.999987	1	unchanged
ENSMUSG00000002658	Gtf2f1	general transcription factor IIF, polypeptide 1	0.639199	4.51358	0	0.990987	1	unchanged
ENSMUSG00000002660	Clpp	caseinolytic mitochondrial matrix peptidase proteolytic subunit	-0.121259	5.68186	0	1	1	unchanged
ENSMUSG00000002661	Alkbh7	alkB homolog 7	-0.515091	3.74877	0	0.994315	1	unchanged
ENSMUSG00000002668	Dennd1c	DENN domain containing 1C	2.47088	2.00241	3.08181	0.00312003	0.0468795	upreg
ENSMUSG00000002679	Med6	mediator complex subunit 6	0.340139	2.91315	0	0.997058	1	unchanged
ENSMUSG00000002699	Lcp2	lymphocyte cytosolic protein 2	3.4061	4.04966	5.44319	1.59332e-05	0.000754435	upreg
ENSMUSG00000002718	Cse1l	chromosome segregation 1 like	-0.281844	4.32901	0	0.999979	1	unchanged
ENSMUSG00000002728	Naa20	N(alpha)-acetyltransferase 20, NatB catalytic subunit	1.20769	1.86274	0.586427	0.282315	1	unchanged
ENSMUSG00000002731	Prkra	protein kinase, interferon inducible double stranded RNA dependent activator	-0.386781	4.16165	0	0.998862	1	unchanged
ENSMUSG00000002732	Fkbp7	FK506 binding protein 7	0.293921	1.90548	0	0.930879	1	unchanged
ENSMUSG00000002733	Plekha3	pleckstrin homology domain-containing, family A (phosphoinositide binding specific) member 3	-0.171839	4.28429	0	0.999935	1	unchanged
ENSMUSG00000002741	Ykt6	YKT6 v-SNARE homolog (S. cerevisiae)	-0.108956	5.87387	0	1	1	unchanged
ENSMUSG00000002748	Baz1b	bromodomain adjacent to zinc finger domain, 1B	0.596883	6.03634	0	0.98322	1	unchanged
ENSMUSG00000002763	Pex6	peroxisomal biogenesis factor 6	-0.426325	4.48499	0	0.999975	1	unchanged
ENSMUSG00000002767	Mrpl2	mitochondrial ribosomal protein L2	-0.416679	5.42639	0	0.999896	1	unchanged
ENSMUSG00000002768	Mea1	male enhanced antigen 1	-0.21921	4.85279	0	0.999981	1	unchanged
ENSMUSG00000002769	Gnmt	glycine N-methyltransferase	-1.00474	10.3192	-0.0248261	0.490229	1	unchanged
ENSMUSG00000002778	Kdelr1	KDEL (Lys-Asp-Glu-Leu) endoplasmic reticulum protein retention receptor 1	-0.200253	7.59111	0	1	1	unchanged
ENSMUSG00000002781	Tmem143	transmembrane protein 143	-0.812201	3.11124	0	0.787021	1	unchanged
ENSMUSG00000002797	Ggct	gamma-glutamyl cyclotransferase	0.599421	4.23066	0	0.986282	1	unchanged
ENSMUSG00000002803	Btbd6	BTB domain containing 6	-0.561835	2.90878	0	0.968225	1	unchanged
ENSMUSG00000002804	Nudt14	nudix hydrolase 14	0.0109154	3.83068	0	0.999998	1	unchanged
ENSMUSG00000002808	Epdr1	ependymin related 1	0.210336	-0.667334	0	0.902349	1	unchanged
ENSMUSG00000002812	Flii	flightless I actin binding protein	0.177123	4.90103	0	0.999992	1	unchanged
ENSMUSG00000002814	Top3a	topoisomerase (DNA) III alpha	-0.0798449	1.15323	0	0.983705	1	unchanged
ENSMUSG00000002820	Atg4d	autophagy related 4D, cysteine peptidase	-0.0776895	3.65183	0	0.999984	1	unchanged
ENSMUSG00000002825	Qtrt1	queuine tRNA-ribosyltransferase catalytic subunit 1	0.295649	2.00118	0	0.969612	1	unchanged
ENSMUSG00000002831	Plin4	perilipin 4	-0.210786	1.79336	0	0.979503	1	unchanged
ENSMUSG00000002833	Hdgfl2	HDGF like 2	0.11976	4.79501	0	0.999986	1	unchanged
ENSMUSG00000002835	Chaf1a	chromatin assembly factor 1, subunit A	1.64315	1.95922	1.13001	0.136494	0.900418	unchanged
ENSMUSG00000002844	Adprh	ADP-ribosylarginine hydrolase	0.77998	3.93074	0	0.796197	1	unchanged
ENSMUSG00000002845	Tmem39a	transmembrane protein 39a	0.308852	3.17115	0	0.993081	1	unchanged
ENSMUSG00000002846	Timmdc1	translocase of inner mitochondrial membrane domain containing 1	-0.336733	5.18003	0	0.999985	1	unchanged
ENSMUSG00000002847	Pla1a	phospholipase A1 member A	0.763256	6.0076	0	0.956081	1	unchanged
ENSMUSG00000002870	Mcm2	minichromosome maintenance complex component 2	2.22032	2.89039	3.78848	0.000638692	0.0139044	upreg
ENSMUSG00000002871	Tpra1	transmembrane protein, adipocyte asscociated 1	0.17441	4.38082	0	0.999836	1	unchanged
ENSMUSG00000002881	Nab1	Ngfi-A binding protein 1	0.0371943	6.01133	0	1	1	unchanged
ENSMUSG00000002885	Adgre5	adhesion G protein-coupled receptor E5	0.870129	5.41829	0	0.730305	1	unchanged
ENSMUSG00000002897	Il17ra	interleukin 17 receptor A	1.1012	5.04873	0.528827	0.301583	1	unchanged
ENSMUSG00000002900	Lamb1	laminin B1	-0.0481363	3.47694	0	0.999972	1	unchanged
ENSMUSG00000002908	Kcnn1	potassium intermediate/small conductance calcium-activated channel, subfamily N, member 1	-1.12774	0.460045	-0.225135	0.412859	1	unchanged
ENSMUSG00000002910	Arrdc2	arrestin domain containing 2	-0.0891075	1.97501	0	0.986761	1	unchanged
ENSMUSG00000002944	Cd36	CD36 molecule	0.122343	5.1136	0	0.998535	1	unchanged
ENSMUSG00000002948	Map2k7	mitogen-activated protein kinase kinase 7	-0.0897409	4.16981	0	0.999995	1	unchanged
ENSMUSG00000002949	Timm44	translocase of inner mitochondrial membrane 44	-0.296888	4.4779	0	0.999655	1	unchanged
ENSMUSG00000002957	Ap2a2	adaptor-related protein complex 2, alpha 2 subunit	0.0562257	5.84732	0	1	1	unchanged
ENSMUSG00000002963	Pnkp	polynucleotide kinase 3'- phosphatase	-0.228031	4.08606	0	0.999922	1	unchanged
ENSMUSG00000002968	Med25	mediator complex subunit 25	-0.271778	4.27473	0	0.999967	1	unchanged
ENSMUSG00000002980	Bcam	basal cell adhesion molecule	0.433663	0.332881	0	0.87489	1	unchanged
ENSMUSG00000002981	Clptm1	cleft lip and palate associated transmembrane protein 1	-0.14275	5.57342	0	1	1	unchanged
ENSMUSG00000002983	Relb	avian reticuloendotheliosis viral (v-rel) oncogene related B	2.28326	2.84526	2.33033	0.0156008	0.170916	unchanged
ENSMUSG00000002984	Tomm40	translocase of outer mitochondrial membrane 40	0.0670293	5.07394	0	0.99998	1	unchanged
ENSMUSG00000002985	Apoe	apolipoprotein E	-1.07278	14.0403	-0.711182	0.242888	1	unchanged
ENSMUSG00000002992	Apoc2	apolipoprotein C2	-0.317279	2.70948	0	0.98114	1	unchanged
ENSMUSG00000002996	Hbp1	high mobility group box transcription factor 1	-0.573104	5.91687	0	0.994106	1	unchanged
ENSMUSG00000002997	Prkar2b	protein kinase, cAMP dependent regulatory, type II beta	1.52443	1.23921	0.845082	0.20473	1	unchanged
ENSMUSG00000003031	Cdkn1b	cyclin dependent kinase inhibitor 1B	-0.0949266	4.67581	0	0.999995	1	unchanged
ENSMUSG00000003032	Klf4	Kruppel-like transcription factor 4 (gut)	0.483955	1.73229	0	0.821797	1	unchanged
ENSMUSG00000003033	Ap1m1	adaptor-related protein complex AP-1, mu subunit 1	0.14429	4.43719	0	0.999999	1	unchanged
ENSMUSG00000003037	Rab8a	RAB8A, member RAS oncogene family	0.0747448	6.53392	0	1	1	unchanged
ENSMUSG00000003038	Hmgn2	high mobility group nucleosomal binding domain 2	1.76904	1.2132	1.62658	0.0603126	0.486094	unchanged
ENSMUSG00000003039	Fam32a	family with sequence similarity 32, member A	-0.460512	5.84403	0	0.998188	1	unchanged
ENSMUSG00000003051	Elf3	E74-like factor 3	4.21251	0.964124	3.34941	0.00173499	0.0296806	upreg
ENSMUSG00000003053	Cyp2c29	cytochrome P450, family 2, subfamily c, polypeptide 29	-2.17922	9.21399	-6.64925	1.28207e-06	9.54926e-05	downreg
ENSMUSG00000003062	Stard3nl	STARD3 N-terminal like	1.271	2.92713	1.23322	0.11641	0.803353	unchanged
ENSMUSG00000003068	Stk11	serine/threonine kinase 11	-0.148107	6.27471	0	1	1	unchanged
ENSMUSG00000003072	Atp5f1d	ATP synthase F1 subunit delta	-0.65817	7.96899	0	0.998506	1	unchanged
ENSMUSG00000003099	Ppp5c	protein phosphatase 5, catalytic subunit	0.0652261	4.77356	0	0.999998	1	unchanged
ENSMUSG00000003119	Cdk12	cyclin dependent kinase 12	0.444338	4.57745	0	0.994652	1	unchanged
ENSMUSG00000003123	Lipe	lipase, hormone sensitive	0.250162	4.38695	0	0.999934	1	unchanged
ENSMUSG00000003131	Pafah1b2	platelet-activating factor acetylhydrolase, isoform 1b, subunit 2	0.419965	5.0218	0	0.999798	1	unchanged
ENSMUSG00000003134	Tbc1d8	TBC1 domain family, member 8	-0.757825	3.02177	0	0.806381	1	unchanged
ENSMUSG00000003135	Cnot11	CCR4-NOT transcription complex, subunit 11	-0.02359	3.14358	0	0.999962	1	unchanged
ENSMUSG00000003153	Slc2a3	solute carrier family 2 (facilitated glucose transporter), member 3	2.02654	0.665589	1.28509	0.107888	0.757215	unchanged
ENSMUSG00000003154	Foxj2	forkhead box J2	0.389652	2.47673	0	0.947566	1	unchanged
ENSMUSG00000003161	Sri	sorcin	0.543262	5.88428	0	0.999784	1	unchanged
ENSMUSG00000003166	Dgcr2	DiGeorge syndrome critical region gene 2	-0.177907	4.92992	0	0.999994	1	unchanged
ENSMUSG00000003184	Irf3	interferon regulatory factor 3	-0.0672299	5.50809	0	1	1	unchanged
ENSMUSG00000003190	Bcl2l12	BCL2 like 12	-0.00812822	1.89448	0	0.999892	1	unchanged
ENSMUSG00000003198	Zfp959	zinc finger protein 959	-0.471209	1.51197	0	0.933599	1	unchanged
ENSMUSG00000003199	Mpnd	MPN domain containing	-0.287536	5.91291	0	0.999962	1	unchanged
ENSMUSG00000003200	Sh3gl1	SH3-domain GRB2-like 1	0.590158	4.19016	0	0.953783	1	unchanged
ENSMUSG00000003206	Ebi3	Epstein-Barr virus induced gene 3	2.44664	2.72734	3.1791	0.00251433	0.0397319	upreg
ENSMUSG00000003208	Yju2	YJU2 splicing factor	-0.337119	0.61753	0	0.923865	1	unchanged
ENSMUSG00000003226	Ranbp2	RAN binding protein 2	0.247672	4.29227	0	0.999806	1	unchanged
ENSMUSG00000003228	Grk5	G protein-coupled receptor kinase 5	0.361227	1.81346	0	0.984152	1	unchanged
ENSMUSG00000003233	Dvl3	dishevelled segment polarity protein 3	-0.49939	0.658506	0	0.891425	1	unchanged
ENSMUSG00000003234	Abcf3	ATP-binding cassette, sub-family F member 3	0.0535429	4.28213	0	0.999998	1	unchanged
ENSMUSG00000003235	Eif2b5	eukaryotic translation initiation factor 2B, subunit 5 epsilon	-0.0216683	4.60513	0	1	1	unchanged
ENSMUSG00000003269	Cyth2	cytohesin 2	-0.171777	3.63945	0	0.999602	1	unchanged
ENSMUSG00000003279	Dlgap1	DLG associated protein 1	-1.51984	-0.366399	-0.726793	0.239354	1	unchanged
ENSMUSG00000003283	Hck	hemopoietic cell kinase	3.34318	5.23565	8.19294	6.75326e-08	9.72135e-06	upreg
ENSMUSG00000003299	Mrpl4	mitochondrial ribosomal protein L4	-0.0513253	4.96261	0	0.999999	1	unchanged
ENSMUSG00000003308	Keap1	kelch-like ECH-associated protein 1	0.272499	6.31784	0	0.999985	1	unchanged
ENSMUSG00000003316	Glg1	golgi apparatus protein 1	0.567021	5.11656	0	0.986434	1	unchanged
ENSMUSG00000003344	Btbd2	BTB domain containing 2	-0.102196	3.26764	0	0.999983	1	unchanged
ENSMUSG00000003345	Csnk1g2	casein kinase 1, gamma 2	-0.105802	5.78442	0	0.999996	1	unchanged
ENSMUSG00000003346	Abhd17a	abhydrolase domain containing 17A	-0.284453	5.30945	0	0.999979	1	unchanged
ENSMUSG00000003348	Mob3a	MOB kinase activator 3A	1.57651	2.07741	1.52014	0.0726295	0.561798	unchanged
ENSMUSG00000003355	Fkbp11	FK506 binding protein 11	0.624065	5.33784	0	0.931182	1	unchanged
ENSMUSG00000003360	Ddx23	DEAD box helicase 23	-0.0846593	3.06815	0	0.999685	1	unchanged
ENSMUSG00000003363	Pld3	phospholipase D family member 3	0.627671	4.51948	0	0.949859	1	unchanged
ENSMUSG00000003380	Rabac1	Rab acceptor 1 (prenylated)	-0.426388	5.98879	0	0.999507	1	unchanged
ENSMUSG00000003382	Etv3	ets variant 3	0.58441	2.53389	0	0.917519	1	unchanged
ENSMUSG00000003402	Prkcsh	protein kinase C substrate 80K-H	0.0729941	6.69047	0	1	1	unchanged
ENSMUSG00000003418	St8sia6	ST8 alpha-N-acetyl-neuraminide alpha-2,8-sialyltransferase 6	0.795572	-1.28584	0	0.636848	1	unchanged
ENSMUSG00000003420	Fcgrt	Fc fragment of IgG receptor and transporter	-0.588941	6.45242	0	0.999139	1	unchanged
ENSMUSG00000003421	Nosip	nitric oxide synthase interacting protein	0.154437	4.34713	0	0.999999	1	unchanged
ENSMUSG00000003423	Pih1d1	PIH1 domain containing 1	-0.700339	4.3248	0	0.976342	1	unchanged
ENSMUSG00000003429	Rps11	ribosomal protein S11	0.00475119	6.06192	0	1	1	unchanged
ENSMUSG00000003435	Supt5	suppressor of Ty 5, DSIF elongation factor subunit	0.237735	5.65822	0	0.999985	1	unchanged
ENSMUSG00000003437	Paf1	Paf1, RNA polymerase II complex component	0.197113	3.99749	0	0.999969	1	unchanged
ENSMUSG00000003438	Timm50	translocase of inner mitochondrial membrane 50	-0.408567	4.40496	0	0.999918	1	unchanged
ENSMUSG00000003444	Med29	mediator complex subunit 29	0.0113688	2.12637	0	0.999755	1	unchanged
ENSMUSG00000003452	Bicd1	BICD cargo adaptor 1	0.647035	-0.512301	0	0.694355	1	unchanged
ENSMUSG00000003458	Ncstn	nicastrin	0.13416	3.37569	0	0.999464	1	unchanged
ENSMUSG00000003464	Pex19	peroxisomal biogenesis factor 19	-0.53885	6.07837	0	0.999034	1	unchanged
ENSMUSG00000003477	Inmt	indolethylamine N-methyltransferase	-2.91401	7.92337	-6.34227	2.39197e-06	0.000155454	downreg
ENSMUSG00000003484	Cyp4f18	cytochrome P450, family 4, subfamily f, polypeptide 18	4.49415	2.00561	4.86736	5.64993e-05	0.00209823	upreg
ENSMUSG00000003500	Impdh1	inosine monophosphate dehydrogenase 1	1.12803	2.7333	0.310982	0.379661	1	unchanged
ENSMUSG00000003518	Dusp3	dual specificity phosphatase 3 (vaccinia virus phosphatase VH1-related)	-0.348531	5.41654	0	0.999808	1	unchanged
ENSMUSG00000003526	Prodh	proline dehydrogenase	-0.828716	5.73794	0	0.857265	1	unchanged
ENSMUSG00000003527	Ess2	ess-2 splicing factor	-0.475883	2.0237	0	0.976508	1	unchanged
ENSMUSG00000003528	Slc25a1	solute carrier family 25 (mitochondrial carrier, citrate transporter), member 1	-1.0128	6.70371	-0.0920026	0.463839	1	unchanged
ENSMUSG00000003531	Dgcr6	DiGeorge syndrome critical region gene 6	-1.09183	4.27495	-0.450677	0.32871	1	unchanged
ENSMUSG00000003534	Ddr1	discoidin domain receptor family, member 1	1.5054	1.69076	1.14751	0.132853	0.886232	unchanged
ENSMUSG00000003541	Ier3	immediate early response 3	1.8057	3.45243	2.05731	0.0269619	0.261876	unchanged
ENSMUSG00000003545	Fosb	FBJ osteosarcoma oncogene B	0.754397	-0.640327	0	0.638715	1	unchanged
ENSMUSG00000003546	Klc4	kinesin light chain 4	-0.55276	5.71162	0	0.994955	1	unchanged
ENSMUSG00000003549	Ercc1	excision repair cross-complementing rodent repair deficiency, complementation group 1	0.587078	2.2	0	0.89898	1	unchanged
ENSMUSG00000003555	Cyp17a1	cytochrome P450, family 17, subfamily a, polypeptide 1	1.08951	4.97875	0.144414	0.444999	1	unchanged
ENSMUSG00000003559	As3mt	arsenite methyltransferase	0.0734365	4.91414	0	0.999981	1	unchanged
ENSMUSG00000003573	Homer3	homer scaffolding protein 3	0.00800013	1.41203	0	0.998758	1	unchanged
ENSMUSG00000003575	Crtc1	CREB regulated transcription coactivator 1	-0.133291	1.90549	0	0.990181	1	unchanged
ENSMUSG00000003581	Rnf215	ring finger protein 215	-0.161933	3.66375	0	0.999949	1	unchanged
ENSMUSG00000003585	Sec14l2	SEC14-like lipid binding 2	-1.0473	8.25214	-0.327839	0.373344	1	unchanged
ENSMUSG00000003604	Aven	apoptosis, caspase activation inhibitor	-0.428537	3.83074	0	0.998378	1	unchanged
ENSMUSG00000003617	Cp	ceruloplasmin	1.65849	11.5084	6.88416	8.02359e-07	6.60725e-05	upreg
ENSMUSG00000003623	Crot	carnitine O-octanoyltransferase	-0.929268	7.9882	0	0.621766	1	unchanged
ENSMUSG00000003644	Rps6ka1	ribosomal protein S6 kinase polypeptide 1	0.441916	3.68956	0	0.970512	1	unchanged
ENSMUSG00000003660	Snrnp200	small nuclear ribonucleoprotein 200 (U5)	0.0531362	5.56295	0	1	1	unchanged
ENSMUSG00000003662	Ciao1	cytosolic iron-sulfur protein assembly 1	-0.0291227	4.39865	0	0.999998	1	unchanged
ENSMUSG00000003680	Taf6l	TATA-box binding protein associated factor 6 like	0.559932	5.57399	0	0.998674	1	unchanged
ENSMUSG00000003721	Insig2	insulin induced gene 2	-1.0658	7.24735	-0.278053	0.392016	1	unchanged
ENSMUSG00000003731	Kpna6	karyopherin subunit alpha 6	-0.299365	4.03706	0	0.999878	1	unchanged
ENSMUSG00000003746	Man1a	mannosidase 1, alpha	-0.0676565	6.10314	0	0.999999	1	unchanged
ENSMUSG00000003752	Itpkc	inositol 1,4,5-trisphosphate 3-kinase C	-0.477069	1.11438	0	0.888396	1	unchanged
ENSMUSG00000003762	Coq8b	coenzyme Q8B	0.346416	3.87245	0	0.988259	1	unchanged
ENSMUSG00000003778	Brd8	bromodomain containing 8	0.420369	4.86052	0	0.999512	1	unchanged
ENSMUSG00000003779	Kif20a	kinesin family member 20A	0.843602	0.892052	0	0.593577	1	unchanged
ENSMUSG00000003808	Farsa	phenylalanyl-tRNA synthetase, alpha subunit	0.296783	6	0	0.999765	1	unchanged
ENSMUSG00000003809	Gcdh	glutaryl-Coenzyme A dehydrogenase	-1.12577	7.42096	-1.01218	0.162206	1	unchanged
ENSMUSG00000003810	Mast2	microtubule associated serine/threonine kinase 2	0.301277	3.06114	0	0.994097	1	unchanged
ENSMUSG00000003812	Dnase2a	deoxyribonuclease II alpha	-0.150494	5.13612	0	0.999985	1	unchanged
ENSMUSG00000003813	Rad23a	RAD23 homolog A, nucleotide excision repair protein	-0.507519	4.20823	0	0.996759	1	unchanged
ENSMUSG00000003814	Calr	calreticulin	0.488566	9.81817	0	0.999324	1	unchanged
ENSMUSG00000003824	Syce2	synaptonemal complex central element protein 2	0.944738	1.02567	0	0.544273	1	unchanged
ENSMUSG00000003847	Nfat5	nuclear factor of activated T cells 5	-0.387096	3.82152	0	0.999705	1	unchanged
ENSMUSG00000003848	Nob1	NIN1/RPN12 binding protein 1 homolog	0.357526	2.53973	0	0.992118	1	unchanged
ENSMUSG00000003849	Nqo1	NAD(P)H dehydrogenase, quinone 1	1.40969	3.35659	0.886519	0.193343	1	unchanged
ENSMUSG00000003865	Gys1	glycogen synthase 1, muscle	1.41936	2.2689	1.32959	0.0998479	0.715215	unchanged
ENSMUSG00000003868	Ruvbl2	RuvB-like AAA ATPase 2	0.210669	2.08456	0	0.99416	1	unchanged
ENSMUSG00000003873	Bax	BCL2-associated X protein	1.34937	2.38501	0.976006	0.170781	1	unchanged
ENSMUSG00000003882	Il7r	interleukin 7 receptor	2.40015	0.271446	1.62329	0.0611106	0.492226	unchanged
ENSMUSG00000003923	Tfam	transcription factor A, mitochondrial	-0.42574	5.03129	0	0.999908	1	unchanged
ENSMUSG00000003929	Zfp81	zinc finger protein 81	-0.175481	1.16723	0	0.983482	1	unchanged
ENSMUSG00000003948	Mmd	monocyte to macrophage differentiation-associated	-1.09461	6.24199	-0.591319	0.280705	1	unchanged
ENSMUSG00000003949	Hlf	hepatic leukemia factor	-0.36309	4.75683	0	0.999241	1	unchanged
ENSMUSG00000003955	Fam162a	family with sequence similarity 162, member A	-0.460877	6.38838	0	0.999964	1	unchanged
ENSMUSG00000003970	Rpl8	ribosomal protein L8	-0.219188	8.42622	0	1	1	unchanged
ENSMUSG00000003992	Ssbp2	single-stranded DNA binding protein 2	0.14429	0.745583	0	0.970997	1	unchanged
ENSMUSG00000004018	Fancl	Fanconi anemia, complementation group L	-0.228506	2.9175	0	0.997391	1	unchanged
ENSMUSG00000004032	Gstm5	glutathione S-transferase, mu 5	-0.243549	3.19892	0	0.99984	1	unchanged
ENSMUSG00000004035	Gstm7	glutathione S-transferase, mu 7	-0.457461	5.58868	0	0.999263	1	unchanged
ENSMUSG00000004038	Gstm3	glutathione S-transferase, mu 3	1.35359	7.43395	1.00315	0.164318	1	unchanged
ENSMUSG00000004040	Stat3	signal transducer and activator of transcription 3	1.14195	8.06709	1.04833	0.153945	0.98742	unchanged
ENSMUSG00000004043	Stat5a	signal transducer and activator of transcription 5A	0.0108088	2.82633	0	0.999989	1	unchanged
ENSMUSG00000004044	Cavin1	caveolae associated 1	0.466061	4.8397	0	0.996084	1	unchanged
ENSMUSG00000004054	Map3k11	mitogen-activated protein kinase kinase kinase 11	-0.362314	3.3498	0	0.988044	1	unchanged
ENSMUSG00000004056	Akt2	thymoma viral proto-oncogene 2	-0.202805	5.02337	0	0.999956	1	unchanged
ENSMUSG00000004069	Dnaja3	DnaJ heat shock protein family (Hsp40) member A3	-0.132635	5.85871	0	0.999999	1	unchanged
ENSMUSG00000004070	Hmox2	heme oxygenase 2	0.343164	6.86555	0	0.999988	1	unchanged
ENSMUSG00000004071	Cdip1	cell death inducing Trp53 target 1	-0.43767	5.95177	0	0.999102	1	unchanged
ENSMUSG00000004085	Map3k20	mitogen-activated protein kinase kinase kinase 20	-0.464274	3.42136	0	0.986362	1	unchanged
ENSMUSG00000004096	Cwc15	CWC15 spliceosome-associated protein	0.127236	6.79231	0	1	1	unchanged
ENSMUSG00000004098	Col5a3	collagen, type V, alpha 3	-1.20029	4.29482	-1.21779	0.119248	0.817474	unchanged
ENSMUSG00000004099	Dnmt1	DNA methyltransferase 1	1.28328	3.14331	1.10159	0.142331	0.931864	unchanged
ENSMUSG00000004100	Ppan	peter pan homolog	0.265287	3.8983	0	0.99529	1	unchanged
ENSMUSG00000004105	Angptl2	angiopoietin-like 2	-1.54228	2.11021	-1.68229	0.0545947	0.452668	unchanged
ENSMUSG00000004127	Trmt10a	tRNA methyltransferase 10A	0.0556094	3.40546	0	0.999938	1	unchanged
ENSMUSG00000004151	Etv1	ets variant 1	1.09683	-0.397995	0.141285	0.447857	1	unchanged
ENSMUSG00000004187	Kifc2	kinesin family member C2	-1.58811	1.01419	-1.54171	0.0699757	0.547015	unchanged
ENSMUSG00000004207	Psap	prosaposin	1.43921	8.46209	2.13387	0.0231846	0.231636	unchanged
ENSMUSG00000004221	Ikbkg	inhibitor of kappaB kinase gamma	-0.0990993	5.14658	0	0.999993	1	unchanged
ENSMUSG00000004233	Wars2	tryptophanyl tRNA synthetase 2 (mitochondrial)	-0.702259	1.62591	0	0.780377	1	unchanged
ENSMUSG00000004263	Atn1	atrophin 1	-0.29903	1.89953	0	0.928956	1	unchanged
ENSMUSG00000004264	Phb2	prohibitin 2	-0.589562	7.33921	0	0.999746	1	unchanged
ENSMUSG00000004266	Ptpn6	protein tyrosine phosphatase, non-receptor type 6	2.00143	5.49232	4.7978	6.5735e-05	0.00231171	upreg
ENSMUSG00000004268	Emg1	EMG1 N1-specific pseudouridine methyltransferase	0.0154425	5.1325	0	1	1	unchanged
ENSMUSG00000004270	Lpcat3	lysophosphatidylcholine acyltransferase 3	-1.24097	5.59049	-1.31546	0.102153	0.727362	unchanged
ENSMUSG00000004285	Atp6v1f	ATPase, H+ transporting, lysosomal V1 subunit F	0.357972	7.5839	0	0.999937	1	unchanged
ENSMUSG00000004317	Clcn5	chloride channel, voltage-sensitive 5	0.560065	3.99586	0	0.988735	1	unchanged
ENSMUSG00000004319	Clcn3	chloride channel, voltage-sensitive 3	-0.144057	6.13728	0	1	1	unchanged
ENSMUSG00000004356	Utp20	UTP20 small subunit processome component	-0.00040966	3.06877	0	1	1	unchanged
ENSMUSG00000004359	Spic	Spi-C transcription factor (Spi-1/PU.1 related)	4.72439	3.40385	4.54562	0.000116164	0.00361526	upreg
ENSMUSG00000004364	Cul3	cullin 3	-0.571087	5.09585	0	0.999524	1	unchanged
ENSMUSG00000004383	Large1	LARGE xylosyl- and glucuronyltransferase 1	0.331356	2.96249	0	0.987273	1	unchanged
ENSMUSG00000004393	Ddx56	DEAD box helicase 56	0.00753415	4.68867	0	0.999999	1	unchanged
ENSMUSG00000004394	Tmed4	transmembrane p24 trafficking protein 4	-0.126259	5.60404	0	1	1	unchanged
ENSMUSG00000004446	Bid	BH3 interacting domain death agonist	0.634135	3.66046	0	0.928201	1	unchanged
ENSMUSG00000004451	Ralb	v-ral simian leukemia viral oncogene B	1.16302	3.94033	0.73846	0.234716	1	unchanged
ENSMUSG00000004455	Ppp1cc	protein phosphatase 1 catalytic subunit gamma	0.0153819	0.572457	0	0.996322	1	unchanged
ENSMUSG00000004460	Dnajb11	DnaJ heat shock protein family (Hsp40) member B11	0.465062	6.69737	0	0.999095	1	unchanged
ENSMUSG00000004462	Tbccd1	TBCC domain containing 1	-0.200242	3.90865	0	0.999933	1	unchanged
ENSMUSG00000004473	Clec11a	C-type lectin domain family 11, member a	-1.024	1.66419	-0.0612288	0.475944	1	unchanged
ENSMUSG00000004500	Zfp324	zinc finger protein 324	0.372133	2.45913	0	0.981728	1	unchanged
ENSMUSG00000004508	Gab2	growth factor receptor bound protein 2-associated protein 2	1.85374	3.36937	2.84191	0.00528056	0.0710037	unchanged
ENSMUSG00000004530	Coro1c	coronin, actin binding protein 1C	0.65053	5.44346	0	0.97674	1	unchanged
ENSMUSG00000004535	Tax1bp1	Tax1 (human T cell leukemia virus type I) binding protein 1	0.255717	7.11768	0	0.999999	1	unchanged
ENSMUSG00000004552	Ctse	cathepsin E	0.534359	-1.03195	0	0.794455	1	unchanged
ENSMUSG00000004558	Ndrg2	N-myc downstream regulated gene 2	-0.897993	10.0874	0	0.809848	1	unchanged
ENSMUSG00000004561	Mettl17	methyltransferase like 17	0.108275	2.93259	0	0.99994	1	unchanged
ENSMUSG00000004562	Arhgef40	Rho guanine nucleotide exchange factor 40	0.256102	1.75696	0	0.980808	1	unchanged
ENSMUSG00000004565	Pnpla6	patatin-like phospholipase domain containing 6	-0.260819	3.54923	0	0.998596	1	unchanged
ENSMUSG00000004567	Mcoln1	mucolipin 1	-0.495767	2.82451	0	0.971773	1	unchanged
ENSMUSG00000004568	Arhgef18	Rho/Rac guanine nucleotide exchange factor 18	0.0780674	4.39421	0	0.999926	1	unchanged
ENSMUSG00000004591	Pkn2	protein kinase N2	-0.175535	5.2971	0	0.999996	1	unchanged
ENSMUSG00000004609	Cd33	CD33 molecule	-0.115334	-0.22949	0	0.955154	1	unchanged
ENSMUSG00000004610	Etfb	electron transferring flavoprotein, beta polypeptide	-0.681351	8.53533	0	0.996826	1	unchanged
ENSMUSG00000004612	Nkg7	natural killer cell group 7 sequence	4.46156	3.02644	5.51571	1.36486e-05	0.000670196	upreg
ENSMUSG00000004626	Stxbp2	syntaxin binding protein 2	0.679595	5.38733	0	0.983378	1	unchanged
ENSMUSG00000004631	Sgce	sarcoglycan, epsilon	0.457287	2.07027	0	0.909594	1	unchanged
ENSMUSG00000004633	Chn2	chimerin 2	-0.358486	4.64813	0	0.999643	1	unchanged
ENSMUSG00000004637	Wwox	WW domain-containing oxidoreductase	-1.22965	2.82808	-0.890001	0.192404	1	unchanged
ENSMUSG00000004642	Slbp	stem-loop binding protein	0.505287	1.74891	0	0.925579	1	unchanged
ENSMUSG00000004655	Aqp1	aquaporin 1	-0.507526	6.28234	0	0.993283	1	unchanged
ENSMUSG00000004661	Arid3b	AT-rich interaction domain 3B	0.253901	2.66933	0	0.995133	1	unchanged
ENSMUSG00000004665	Cnn2	calponin 2	2.03223	4.16215	5.19763	2.71843e-05	0.00116261	upreg
ENSMUSG00000004667	Polr2e	polymerase (RNA) II (DNA directed) polypeptide E	-0.205702	5.46699	0	1	1	unchanged
ENSMUSG00000004677	Myo9b	myosin IXb	1.12129	3.69289	0.559855	0.291122	1	unchanged
ENSMUSG00000004698	Hdac9	histone deacetylase 9	1.68928	1.1563	1.00929	0.163335	1	unchanged
ENSMUSG00000004707	Ly9	lymphocyte antigen 9	3.74684	1.82298	3.56939	0.00105138	0.0206813	upreg
ENSMUSG00000004709	Cd244a	CD244 molecule A	5.31769	0.71036	3.97949	0.000421522	0.0100472	upreg
ENSMUSG00000004730	Adgre1	adhesion G protein-coupled receptor E1	2.09355	5.92757	4.00425	0.000391853	0.00942866	upreg
ENSMUSG00000004748	Mtfp1	mitochondrial fission process 1	-1.12408	4.1165	-0.722568	0.239457	1	unchanged
ENSMUSG00000004768	Rab23	RAB23, member RAS oncogene family	-0.424339	1.73073	0	0.957632	1	unchanged
ENSMUSG00000004771	Rab11a	RAB11A, member RAS oncogene family	0.14321	6.16772	0	1	1	unchanged
ENSMUSG00000004788	Eif2b2	eukaryotic translation initiation factor 2B, subunit 2 beta	0.422325	4.8998	0	0.997785	1	unchanged
ENSMUSG00000004789	Dlst	dihydrolipoamide S-succinyltransferase	-0.608114	6.48673	0	0.998493	1	unchanged
ENSMUSG00000004798	Ulk2	unc-51 like kinase 2	-1.08828	5.11217	-0.624535	0.269923	1	unchanged
ENSMUSG00000004814	Ccl24	C-C motif chemokine ligand 24	4.58303	4.37642	7.19976	4.33032e-07	4.13032e-05	upreg
ENSMUSG00000004815	Dgkq	diacylglycerol kinase, theta	-0.534316	3.55573	0	0.993147	1	unchanged
ENSMUSG00000004837	Grap	GRB2-related adaptor protein	0.70694	2.32826	0	0.789445	1	unchanged
ENSMUSG00000004843	Chmp2b	charged multivesicular body protein 2B	0.405171	5.57119	0	0.999553	1	unchanged
ENSMUSG00000004846	Plod3	procollagen-lysine, 2-oxoglutarate 5-dioxygenase 3	0.610998	4.561	0	0.983874	1	unchanged
ENSMUSG00000004849	Ap1s1	adaptor protein complex AP-1, sigma 1	0.354004	4.74719	0	0.999809	1	unchanged
ENSMUSG00000004865	Srpk1	serine/arginine-rich protein specific kinase 1	0.320307	4.32968	0	0.999957	1	unchanged
ENSMUSG00000004880	Lbr	lamin B receptor	0.420446	4.81851	0	0.991701	1	unchanged
ENSMUSG00000004891	Nes	nestin	-1.04612	0.483283	-0.108398	0.457483	1	unchanged
ENSMUSG00000004895	Prcc	papillary renal cell carcinoma (translocation-associated)	-0.152139	0.891268	0	0.984535	1	unchanged
ENSMUSG00000004896	Mettl25b	methyltransferase like 25B	0.232872	2.59868	0	0.994079	1	unchanged
ENSMUSG00000004897	Hdgf	heparin binding growth factor	-0.184304	7.86451	0	1	1	unchanged
ENSMUSG00000004929	Thop1	thimet oligopeptidase 1	0.356993	1.55506	0	0.962638	1	unchanged
ENSMUSG00000004931	Apba3	amyloid beta precursor protein binding family A member 3	0.528859	4.07969	0	0.959767	1	unchanged
ENSMUSG00000004934	Pias4	protein inhibitor of activated STAT 4	0.0298177	4.04447	0	0.999999	1	unchanged
ENSMUSG00000004936	Map2k1	mitogen-activated protein kinase kinase 1	0.0251161	4.87037	0	0.999993	1	unchanged
ENSMUSG00000004937	Sgta	small glutamine-rich tetratricopeptide repeat (TPR)-containing, alpha	-0.0946303	6.40463	0	1	1	unchanged
ENSMUSG00000004945	Tmem242	transmembrane protein 242	-0.616712	5.77332	0	0.996014	1	unchanged
ENSMUSG00000004947	Dtx2	deltex 2, E3 ubiquitin ligase	0.432195	2.49482	0	0.990274	1	unchanged
ENSMUSG00000004951	Hspb1	heat shock protein 1	0.520133	3.57789	0	0.907163	1	unchanged
ENSMUSG00000004952	Rasa4	RAS p21 protein activator 4	2.64426	3.55399	3.51981	0.00117202	0.0225198	upreg
ENSMUSG00000004980	Hnrnpa2b1	heterogeneous nuclear ribonucleoprotein A2/B1	0.18359	7.42453	0	1	1	unchanged
ENSMUSG00000004994	Yju2b	YJU2 splicing factor homolog B	0.184817	2.31216	0	0.999038	1	unchanged
ENSMUSG00000004996	Mri1	methylthioribose-1-phosphate isomerase 1	-0.415885	3.80276	0	0.998121	1	unchanged
ENSMUSG00000005034	Prkacb	protein kinase, cAMP dependent, catalytic, beta	-0.0896036	5.15019	0	1	1	unchanged
ENSMUSG00000005043	Sgsh	N-sulfoglucosamine sulfohydrolase (sulfamidase)	0.465724	3.12113	0	0.978869	1	unchanged
ENSMUSG00000005054	Cstb	cystatin B	1.13021	6.88624	0.853298	0.202163	1	unchanged
ENSMUSG00000005057	Sh2b2	SH2B adaptor protein 2	0.358085	2.82471	0	0.984706	1	unchanged
ENSMUSG00000005069	Pex5	peroxisomal biogenesis factor 5	-0.704622	5.1489	0	0.949556	1	unchanged
ENSMUSG00000005078	Jkamp	JNK1/MAPK8-associated membrane protein	0.0131705	5.36347	0	1	1	unchanged
ENSMUSG00000005087	Cd44	CD44 antigen	2.92597	5.7439	9.24225	1.09065e-08	2.00831e-06	upreg
ENSMUSG00000005089	Slc1a2	solute carrier family 1 (glial high affinity glutamate transporter), member 2	-0.130334	6.52759	0	0.99999	1	unchanged
ENSMUSG00000005102	Eif2ak4	eukaryotic translation initiation factor 2 alpha kinase 4	0.210004	3.26889	0	0.999763	1	unchanged
ENSMUSG00000005103	Wdr1	WD repeat domain 1	0.928605	5.51787	0	0.713422	1	unchanged
ENSMUSG00000005107	Slc2a9	solute carrier family 2 (facilitated glucose transporter), member 9	-0.839839	5.02214	0	0.826642	1	unchanged
ENSMUSG00000005124	Ccn4	cellular communication network factor 4	-1.09997	1.26579	-0.23846	0.407104	1	unchanged
ENSMUSG00000005125	Ndrg1	N-myc downstream regulated gene 1	0.0873624	4.70603	0	0.999994	1	unchanged
ENSMUSG00000005142	Man2b1	mannosidase 2, alpha B1	-0.161846	6.72824	0	0.999999	1	unchanged
ENSMUSG00000005148	Klf5	Kruppel-like transcription factor 5	0.347831	-0.785907	0	0.835723	1	unchanged
ENSMUSG00000005150	Wdr83	WD repeat domain containing 83	-0.0459238	3.56432	0	0.999997	1	unchanged
ENSMUSG00000005161	Prdx2	peroxiredoxin 2	-0.181644	6.99375	0	0.999999	1	unchanged
ENSMUSG00000005198	Polr2a	polymerase (RNA) II (DNA directed) polypeptide A	0.181066	5.44116	0	0.999999	1	unchanged
ENSMUSG00000005204	Senp3	SUMO/sentrin specific peptidase 3	0.444973	1.78632	0	0.958173	1	unchanged
ENSMUSG00000005225	Plekha8	pleckstrin homology domain containing, family A (phosphoinositide binding specific) member 8	-0.654378	3.62847	0	0.94272	1	unchanged
ENSMUSG00000005233	Spc25	SPC25, NDC80 kinetochore complex component, homolog (S. cerevisiae)	-0.607475	2.54059	0	0.798335	1	unchanged
ENSMUSG00000005251	Ripk4	receptor-interacting serine-threonine kinase 4	-0.275316	2.02555	0	0.979455	1	unchanged
ENSMUSG00000005262	Ufd1	ubiquitin recognition factor in ER-associated degradation 1	0.275733	5.75979	0	0.999994	1	unchanged
ENSMUSG00000005268	Prlr	prolactin receptor	-0.514743	6.89167	0	0.989099	1	unchanged
ENSMUSG00000005299	Letm1	leucine zipper-EF-hand containing transmembrane protein 1	-0.759385	5.95008	0	0.978728	1	unchanged
ENSMUSG00000005312	Ubqln1	ubiquilin 1	-0.249164	6.75345	0	0.999999	1	unchanged
ENSMUSG00000005320	Fgfr4	fibroblast growth factor receptor 4	0.142815	4.02026	0	0.999981	1	unchanged
ENSMUSG00000005338	Cadm3	cell adhesion molecule 3	-1.51414	1.34371	-1.36439	0.0943471	0.686151	unchanged
ENSMUSG00000005354	Txn2	thioredoxin 2	-0.185488	7.09143	0	1	1	unchanged
ENSMUSG00000005360	Slc1a3	solute carrier family 1 (glial high affinity glutamate transporter), member 3	2.74237	2.44747	3.27887	0.00201327	0.0336171	upreg
ENSMUSG00000005362	Crbn	cereblon	0.386291	3.20951	0	0.996016	1	unchanged
ENSMUSG00000005370	Msh6	mutS homolog 6	0.128662	3.82089	0	0.999916	1	unchanged
ENSMUSG00000005371	Fbxo11	F-box protein 11	-0.014915	3.66042	0	0.999987	1	unchanged
ENSMUSG00000005373	Mlxipl	MLX interacting protein-like	-1.31747	6.55874	-1.36549	0.0941766	0.685324	unchanged
ENSMUSG00000005374	Tbl2	transducin (beta)-like 2	0.544677	4.23824	0	0.990875	1	unchanged
ENSMUSG00000005378	Bud23	BUD23, rRNA methyltransferase and ribosome maturation factor	-0.307613	4.64184	0	0.999975	1	unchanged
ENSMUSG00000005397	Nid1	nidogen 1	1.52755	3.66029	1.89828	0.0366268	0.335822	unchanged
ENSMUSG00000005410	Mcm5	minichromosome maintenance complex component 5	2.41831	3.27845	3.40089	0.00153136	0.0270704	upreg
ENSMUSG00000005413	Hmox1	heme oxygenase 1	3.18307	5.05114	4.39987	0.00016034	0.00462126	upreg
ENSMUSG00000005417	Mprip	myosin phosphatase Rho interacting protein	-0.121939	6.03317	0	1	1	unchanged
ENSMUSG00000005442	Cic	capicua transcriptional repressor	0.254534	4.0283	0	0.999788	1	unchanged
ENSMUSG00000005447	Pafah1b3	platelet-activating factor acetylhydrolase, isoform 1b, subunit 3	0.559297	3.3016	0	0.947803	1	unchanged
ENSMUSG00000005469	Prkaca	protein kinase, cAMP dependent, catalytic, alpha	-0.171916	5.97662	0	0.999996	1	unchanged
ENSMUSG00000005470	Asf1b	anti-silencing function 1B histone chaperone	2.31376	1.96438	2.34988	0.0149877	0.166421	unchanged
ENSMUSG00000005481	Ddx39a	DEAD box helicase 39a	0.83818	4.3312	0	0.83114	1	unchanged
ENSMUSG00000005483	Dnajb1	DnaJ heat shock protein family (Hsp40) member B1	0.677683	5.33854	0	0.863763	1	unchanged
ENSMUSG00000005501	Usp40	ubiquitin specific peptidase 40	-0.0598086	4.66802	0	0.999999	1	unchanged
ENSMUSG00000005505	Kbtbd4	kelch repeat and BTB (POZ) domain containing 4	-0.0579811	2.65947	0	0.999958	1	unchanged
ENSMUSG00000005506	Celf1	CUGBP, Elav-like family member 1	-0.0745712	6.63549	0	1	1	unchanged
ENSMUSG00000005510	Ndufs3	NADH:ubiquinone oxidoreductase core subunit S3	-0.449626	5.23644	0	0.999455	1	unchanged
ENSMUSG00000005514	Por	cytochrome p450 oxidoreductase	0.00201985	7.58452	0	0.999997	1	unchanged
ENSMUSG00000005533	Igf1r	insulin-like growth factor I receptor	-0.329242	2.58172	0	0.995871	1	unchanged
ENSMUSG00000005534	Insr	insulin receptor	-0.170819	5.34793	0	0.999996	1	unchanged
ENSMUSG00000005547	Cyp2a5	cytochrome P450, family 2, subfamily a, polypeptide 5	0.294624	8.32135	0	0.990092	1	unchanged
ENSMUSG00000005553	Atp4a	ATPase, H+/K+ exchanging, gastric, alpha polypeptide	-1.08017	0.378016	-0.148216	0.442443	1	unchanged
ENSMUSG00000005566	Trim28	tripartite motif-containing 28	0.309594	5.53457	0	0.999875	1	unchanged
ENSMUSG00000005575	Ube2m	ubiquitin-conjugating enzyme E2M	0.268576	4.15612	0	0.999721	1	unchanged
ENSMUSG00000005580	Adcy9	adenylate cyclase 9	-0.233859	3.76045	0	0.999961	1	unchanged
ENSMUSG00000005583	Mef2c	myocyte enhancer factor 2C	0.351168	3.71165	0	0.980709	1	unchanged
ENSMUSG00000005609	Ctr9	CTR9 homolog, Paf1/RNA polymerase II complex component	0.140317	5.47486	0	1	1	unchanged
ENSMUSG00000005610	Eif4g2	eukaryotic translation initiation factor 4, gamma 2	-0.116909	8.6001	0	1	1	unchanged
ENSMUSG00000005611	Irag1	inositol 1,4,5-triphosphate receptor associated 1	-0.268996	0.978516	0	0.946457	1	unchanged
ENSMUSG00000005615	Pcyt1a	phosphate cytidylyltransferase 1, choline, alpha isoform	-0.492985	5.67558	0	0.999884	1	unchanged
ENSMUSG00000005621	Zfp592	zinc finger protein 592	-0.0185765	3.92626	0	0.999995	1	unchanged
ENSMUSG00000005625	Psmd4	proteasome (prosome, macropain) 26S subunit, non-ATPase, 4	0.374547	7.52255	0	0.999945	1	unchanged
ENSMUSG00000005656	Snx6	sorting nexin 6	1.07757	5.02584	0.501714	0.310871	1	unchanged
ENSMUSG00000005667	Mthfd2	methylenetetrahydrofolate dehydrogenase (NAD+ dependent), methenyltetrahydrofolate cyclohydrolase	0.839937	2.78431	0	0.75589	1	unchanged
ENSMUSG00000005672	Kit	KIT proto-oncogene receptor tyrosine kinase	0.159772	1.81469	0	0.986264	1	unchanged
ENSMUSG00000005674	Tomm40l	translocase of outer mitochondrial membrane 40-like	0.120565	2.99903	0	0.99959	1	unchanged
ENSMUSG00000005677	Nr1i3	nuclear receptor subfamily 1, group I, member 3	-0.382856	6.49381	0	0.999789	1	unchanged
ENSMUSG00000005681	Apoa2	apolipoprotein A-II	-1.29899	12.0483	-2.32822	0.0156631	0.171338	unchanged
ENSMUSG00000005682	Pan2	PAN2 poly(A) specific ribonuclease subunit	-0.167594	3.58916	0	0.999771	1	unchanged
ENSMUSG00000005683	Cs	citrate synthase	-0.358991	6.29982	0	0.99992	1	unchanged
ENSMUSG00000005686	Ampd3	adenosine monophosphate deaminase 3	0.715177	0.491911	0	0.686383	1	unchanged
ENSMUSG00000005687	Bcas2	BCAS2 pre-mRNA processing factor	0.193107	4.39927	0	0.999954	1	unchanged
ENSMUSG00000005698	Ctcf	CCCTC-binding factor	0.110148	4.96622	0	0.99991	1	unchanged
ENSMUSG00000005699	Pard6a	par-6 family cell polarity regulator alpha	-0.270177	2.37932	0	0.991987	1	unchanged
ENSMUSG00000005718	Tfap4	transcription factor AP4	-0.200322	0.655621	0	0.975884	1	unchanged
ENSMUSG00000005732	Ranbp1	RAN binding protein 1	0.614214	5.18458	0	0.998084	1	unchanged
ENSMUSG00000005763	Cd247	CD247 antigen	4.23501	0.853587	4.30584	0.000198823	0.00536861	upreg
ENSMUSG00000005774	Rfx5	regulatory factor X, 5 (influences HLA class II expression)	0.576423	3.4909	0	0.935684	1	unchanged
ENSMUSG00000005779	Psmb4	proteasome (prosome, macropain) subunit, beta type 4	0.301732	8.18957	0	0.999996	1	unchanged
ENSMUSG00000005800	Mmp8	matrix metallopeptidase 8	3.83345	0.537768	1.74485	0.0526737	0.439336	unchanged
ENSMUSG00000005802	Slc30a4	solute carrier family 30 (zinc transporter), member 4	-0.277504	2.65915	0	0.987188	1	unchanged
ENSMUSG00000005803	Sqor	sulfide quinone oxidoreductase	-0.618669	6.19052	0	0.993842	1	unchanged
ENSMUSG00000005804	Bloc1s6	biogenesis of lysosomal organelles complex-1, subunit 6, pallidin	0.67231	3.23364	0	0.932606	1	unchanged
ENSMUSG00000005813	Metap1	methionyl aminopeptidase 1	0.139618	5.42875	0	0.999999	1	unchanged
ENSMUSG00000005823	Gpr108	G protein-coupled receptor 108	0.202151	4.35458	0	0.99998	1	unchanged
ENSMUSG00000005824	Tnfsf14	tumor necrosis factor (ligand) superfamily, member 14	4.47057	-0.523837	4.30474	0.000199613	0.00537901	upreg
ENSMUSG00000005836	Gata6	GATA binding protein 6	0.717666	3.58118	0	0.900931	1	unchanged
ENSMUSG00000005846	Rsl1d1	ribosomal L1 domain containing 1	0.157284	5.83819	0	1	1	unchanged
ENSMUSG00000005871	Apc	APC, WNT signaling pathway regulator	-0.139702	4.25323	0	0.999975	1	unchanged
ENSMUSG00000005873	Reep5	receptor accessory protein 5	0.335389	4.83207	0	0.99989	1	unchanged
ENSMUSG00000005881	Ergic3	ERGIC and golgi 3	-0.368997	5.90252	0	0.999983	1	unchanged
ENSMUSG00000005882	Uqcc1	ubiquinol-cytochrome c reductase complex assembly factor 1	-0.452887	4.23584	0	0.99883	1	unchanged
ENSMUSG00000005886	Ncoa2	nuclear receptor coactivator 2	-0.298332	4.32701	0	0.999798	1	unchanged
ENSMUSG00000005893	Nr2c2	nuclear receptor subfamily 2, group C, member 2	-0.5342	4.54106	0	0.998296	1	unchanged
ENSMUSG00000005897	Nr2c1	nuclear receptor subfamily 2, group C, member 1	-0.489461	3.04659	0	0.951455	1	unchanged
ENSMUSG00000005899	Smpd4	sphingomyelin phosphodiesterase 4	0.0495237	2.31129	0	0.999501	1	unchanged
ENSMUSG00000005907	Pex1	peroxisomal biogenesis factor 1	-0.410828	4.0982	0	0.997794	1	unchanged
ENSMUSG00000005936	Kctd20	potassium channel tetramerisation domain containing 20	0.146996	4.41857	0	0.999979	1	unchanged
ENSMUSG00000005949	Ctns	cystinosis, nephropathic	-0.342475	2.64567	0	0.989243	1	unchanged
ENSMUSG00000005951	Shpk	sedoheptulokinase	-0.766024	4.19717	0	0.902515	1	unchanged
ENSMUSG00000005968	Tuft1	tuftelin 1	0.101105	2.41485	0	0.992511	1	unchanged
ENSMUSG00000005973	Rcn1	reticulocalbin 1	1.84905	3.56135	3.2795	0.00200987	0.0336026	upreg
ENSMUSG00000005981	Trap1	TNF receptor-associated protein 1	-0.503455	6.34237	0	0.99959	1	unchanged
ENSMUSG00000005982	Naa60	N(alpha)-acetyltransferase 60, NatF catalytic subunit	-0.709867	6.18905	0	0.979746	1	unchanged
ENSMUSG00000005983	1700037C18Rik	RIKEN cDNA 1700037C18 gene	2.23149	-0.43371	1.38653	0.0918704	0.672195	unchanged
ENSMUSG00000006005	Tpr	translocated promoter region, nuclear basket protein	0.274062	6.63949	0	0.999817	1	unchanged
ENSMUSG00000006010	Odr4	odr4 GPCR localization factor homolog	0.0333297	5.74881	0	1	1	unchanged
ENSMUSG00000006014	Prg4	proteoglycan 4 (megakaryocyte stimulating factor, articular superficial zone protein)	2.52693	6.52924	12.9335	4.68753e-11	2.95939e-08	upreg
ENSMUSG00000006019	Dhx34	DExH-box helicase 34	0.996685	2.14642	0	0.504589	1	unchanged
ENSMUSG00000006021	Kptn	kaptin	-0.777885	2.65193	0	0.839103	1	unchanged
ENSMUSG00000006024	Napa	N-ethylmaleimide sensitive fusion protein attachment protein alpha	-0.0889202	5.63896	0	1	1	unchanged
ENSMUSG00000006050	Sra1	steroid receptor RNA activator 1	-0.00633208	5.97775	0	1	1	unchanged
ENSMUSG00000006057	Atp5mc1	ATP synthase membrane subunit c locus 1	-0.663586	6.56675	0	0.997197	1	unchanged
ENSMUSG00000006058	Snf8	SNF8, ESCRT-II complex subunit, homolog (S. cerevisiae)	0.00275221	5.3399	0	1	1	unchanged
ENSMUSG00000006095	Tbcb	tubulin folding cofactor B	0.709562	5.4552	0	0.978654	1	unchanged
ENSMUSG00000006127	Inpp5k	inositol polyphosphate 5-phosphatase K	-0.0662634	3.24636	0	0.999948	1	unchanged
ENSMUSG00000006154	Eps8l1	EPS8-like 1	-0.911203	0.510227	0	0.570956	1	unchanged
ENSMUSG00000006169	Clint1	clathrin interactor 1	-0.08213	5.2215	0	0.999999	1	unchanged
ENSMUSG00000006191	Cdkal1	CDK5 regulatory subunit associated protein 1-like 1	0.0179467	3.89136	0	1	1	unchanged
ENSMUSG00000006205	Htra1	HtrA serine peptidase 1	1.3576	1.80117	0.451	0.332558	1	unchanged
ENSMUSG00000006215	Zbtb17	zinc finger and BTB domain containing 17	0.566793	2.78559	0	0.924275	1	unchanged
ENSMUSG00000006218	Fam131c	family with sequence similarity 131, member C	0.0694086	0.0271066	0	0.974378	1	unchanged
ENSMUSG00000006219	Fblim1	filamin binding LIM protein 1	3.19882	2.45899	4.04683	0.000356001	0.00872433	upreg
ENSMUSG00000006235	Epor	erythropoietin receptor	-1.29659	-0.768963	-0.320529	0.387457	1	unchanged
ENSMUSG00000006241	Ccdc159	coiled-coil domain containing 159	0.283768	0.0920294	0	0.929325	1	unchanged
ENSMUSG00000006262	Mob1b	MOB kinase activator 1B	-0.544916	4.26975	0	0.986029	1	unchanged
ENSMUSG00000006273	Atp6v1b2	ATPase, H+ transporting, lysosomal V1 subunit B2	0.916187	6.541	0	0.730142	1	unchanged
ENSMUSG00000006276	Eps15l1	epidermal growth factor receptor pathway substrate 15-like 1	0.252145	3.18782	0	0.998431	1	unchanged
ENSMUSG00000006281	Tep1	telomerase associated protein 1	0.868709	3.87961	0	0.742443	1	unchanged
ENSMUSG00000006288	Ttc5	tetratricopeptide repeat domain 5	0.431627	-0.0939981	0	0.829941	1	unchanged
ENSMUSG00000006289	Osgep	O-sialoglycoprotein endopeptidase	0.012169	4.02115	0	0.999999	1	unchanged
ENSMUSG00000006299	Aamp	angio-associated migratory protein	-0.100737	7.51081	0	0.999986	1	unchanged
ENSMUSG00000006301	Tmbim1	transmembrane BAX inhibitor motif containing 1	0.189046	5.02615	0	0.999981	1	unchanged
ENSMUSG00000006304	Arpc2	actin related protein 2/3 complex, subunit 2	0.592112	8.01078	0	0.999538	1	unchanged
ENSMUSG00000006307	Kmt2b	lysine (K)-specific methyltransferase 2B	0.460684	3.35213	0	0.981993	1	unchanged
ENSMUSG00000006315	Tmem147	transmembrane protein 147	-0.751862	6.4619	0	0.96526	1	unchanged
ENSMUSG00000006333	Rps9	ribosomal protein S9	0.0609283	7.97917	0	0.999999	1	unchanged
ENSMUSG00000006335	Tfpt	TCF3 (E2A) fusion partner	0.566474	2.04219	0	0.920595	1	unchanged
ENSMUSG00000006342	Susd2	sushi domain containing 2	0.463595	1.76103	0	0.919319	1	unchanged
ENSMUSG00000006344	Ggt5	gamma-glutamyltransferase 5	1.28273	2.56254	0.836431	0.206755	1	unchanged
ENSMUSG00000006356	Crip2	cysteine rich protein 2	0.00663981	6.96977	0	1	1	unchanged
ENSMUSG00000006360	Crip1	cysteine-rich protein 1	2.01229	4.83845	4.05962	0.000345693	0.00850374	upreg
ENSMUSG00000006362	Cbfa2t3	CBFA2/RUNX1 translocation partner 3	0.221958	2.75643	0	0.985436	1	unchanged
ENSMUSG00000006369	Fbln1	fibulin 1	-0.601381	-0.26423	0	0.749605	1	unchanged
ENSMUSG00000006373	Pgrmc1	progesterone receptor membrane component 1	-0.716516	8.15116	0	0.968059	1	unchanged
ENSMUSG00000006378	Gcat	glycine C-acetyltransferase (2-amino-3-ketobutyrate-coenzyme A ligase)	-1.24955	5.66995	-1.75947	0.0474508	0.406135	unchanged
ENSMUSG00000006386	Tek	TEK receptor tyrosine kinase	-1.17554	2.10694	-0.5525	0.293586	1	unchanged
ENSMUSG00000006390	Elovl1	ELOVL fatty acid elongase 1	0.185504	5.98453	0	0.999999	1	unchanged
ENSMUSG00000006392	Med8	mediator complex subunit 8	0.210956	6.10019	0	0.999999	1	unchanged
ENSMUSG00000006395	Hyi	hydroxypyruvate isomerase (putative)	-1.31866	6.24668	-2.17306	0.0214436	0.217417	unchanged
ENSMUSG00000006398	Cdc20	cell division cycle 20	1.21877	3.1639	0.297091	0.388472	1	unchanged
ENSMUSG00000006403	Adamts4	ADAM metallopeptidase with thrombospondin type 1 motif 4	3.74197	0.829103	2.65574	0.00799151	0.09986	unchanged
ENSMUSG00000006411	Nectin4	nectin cell adhesion molecule 4	2.37977	-0.714309	1.51549	0.0739709	0.569847	unchanged
ENSMUSG00000006412	Pfdn2	prefoldin 2	0.079134	4.72507	0	0.999999	1	unchanged
ENSMUSG00000006418	Rnf114	ring finger protein 114	0.40602	5.63037	0	0.999952	1	unchanged
ENSMUSG00000006423	Steep1	STING1 ER exit protein 1	-0.135162	2.24334	0	0.997523	1	unchanged
ENSMUSG00000006442	Srm	spermidine synthase	0.219914	5.32509	0	0.999835	1	unchanged
ENSMUSG00000006445	Epha2	Eph receptor A2	0.579327	1.65346	0	0.828619	1	unchanged
ENSMUSG00000006456	Rbm14	RNA binding motif protein 14	0.376726	3.75488	0	0.995673	1	unchanged
ENSMUSG00000006463	Zdhhc24	zinc finger, DHHC domain containing 24	0.51549	0.786511	0	0.801947	1	unchanged
ENSMUSG00000006471	Ndor1	NADPH dependent diflavin oxidoreductase 1	0.128957	2.42573	0	0.999116	1	unchanged
ENSMUSG00000006476	Nsmf	NMDA receptor synaptonuclear signaling and neuronal migration factor	-0.812854	5.45938	0	0.897874	1	unchanged
ENSMUSG00000006494	Pdk1	pyruvate dehydrogenase kinase, isoenzyme 1	-1.53218	4.8436	-2.71072	0.00701134	0.090074	unchanged
ENSMUSG00000006498	Ptbp1	polypyrimidine tract binding protein 1	0.594987	5.42226	0	0.998142	1	unchanged
ENSMUSG00000006517	Mvd	mevalonate (diphospho) decarboxylase	0.483446	5.47763	0	0.866934	1	unchanged
ENSMUSG00000006519	Cyba	cytochrome b-245, alpha polypeptide	3.37804	5.59731	9.83135	4.15528e-09	8.8856e-07	upreg
ENSMUSG00000006522	Itih3	inter-alpha trypsin inhibitor, heavy chain 3	1.67932	10.9776	4.01239	0.000384704	0.00930731	upreg
ENSMUSG00000006526	Stimate	STIM activating enhancer	0.308385	3.40769	0	0.99874	1	unchanged
ENSMUSG00000006527	Sfmbt1	Scm-like with four mbt domains 1	-0.240255	4.87761	0	0.99999	1	unchanged
ENSMUSG00000006529	Itih1	inter-alpha trypsin inhibitor, heavy chain 1	-0.307908	8.38429	0	0.999863	1	unchanged
ENSMUSG00000006538	Ihh	Indian hedgehog	-1.27361	-0.3259	-0.363913	0.363554	1	unchanged
ENSMUSG00000006567	Atp7b	ATPase, Cu++ transporting, beta polypeptide	-0.658514	2.81449	0	0.915288	1	unchanged
ENSMUSG00000006574	Slc4a1	solute carrier family 4 (anion exchanger), member 1	0.173421	-0.112704	0	0.950937	1	unchanged
ENSMUSG00000006575	Rundc3a	RUN domain containing 3A	0.883104	-0.145931	0	0.57179	1	unchanged
ENSMUSG00000006585	Cdt1	chromatin licensing and DNA replication factor 1	1.39452	3.15922	1.10108	0.142439	0.93211	unchanged
ENSMUSG00000006586	Runx1t1	RUNX1 translocation partner 1	-0.0766607	-0.182825	0	0.975711	1	unchanged
ENSMUSG00000006589	Aprt	adenine phosphoribosyl transferase	0.703283	5.9821	0	0.95044	1	unchanged
ENSMUSG00000006599	Gtf2h1	general transcription factor II H, polypeptide 1	-0.180544	4.32635	0	0.999971	1	unchanged
ENSMUSG00000006611	Hfe	homeostatic iron regulator	-0.183528	5.31181	0	1	1	unchanged
ENSMUSG00000006638	Abhd1	abhydrolase domain containing 1	-0.620924	1.46925	0	0.861461	1	unchanged
ENSMUSG00000006641	Slc5a6	solute carrier family 5 (sodium-dependent vitamin transporter), member 6	-0.267468	2.6397	0	0.997671	1	unchanged
ENSMUSG00000006673	Qrich1	glutamine-rich 1	-0.232094	4.30038	0	0.999928	1	unchanged
ENSMUSG00000006676	Usp19	ubiquitin specific peptidase 19	0.160563	4.70467	0	0.999617	1	unchanged
ENSMUSG00000006678	Pola1	polymerase (DNA directed), alpha 1	0.794401	2.14059	0	0.752332	1	unchanged
ENSMUSG00000006699	Cdc42	cell division cycle 42	0.47379	7.97266	0	0.999969	1	unchanged
ENSMUSG00000006705	Pknox1	Pbx/knotted 1 homeobox	-0.124987	3.94462	0	0.999878	1	unchanged
ENSMUSG00000006711	D130043K22Rik	RIKEN cDNA D130043K22 gene	-2.30316	1.20153	-3.5634	0.00106223	0.0208355	downreg
ENSMUSG00000006715	Gmnn	geminin	1.03537	2.69371	0.114264	0.455127	1	unchanged
ENSMUSG00000006717	Acot13	acyl-CoA thioesterase 13	-1.07985	6.58934	-0.77591	0.223768	1	unchanged
ENSMUSG00000006728	Cdk4	cyclin dependent kinase 4	0.679558	3.88969	0	0.959668	1	unchanged
ENSMUSG00000006731	B4galnt1	beta-1,4-N-acetyl-galactosaminyl transferase 1	0.311155	5.58697	0	0.999618	1	unchanged
ENSMUSG00000006732	Mettl1	methyltransferase 1, tRNA methylguanosine	0.604712	4.3753	0	0.955448	1	unchanged
ENSMUSG00000006736	Tspan31	tetraspanin 31	-0.101337	6.23829	0	0.999996	1	unchanged
ENSMUSG00000006740	Kif5b	kinesin family member 5B	0.214221	6.11038	0	0.999998	1	unchanged
ENSMUSG00000006763	Saal1	serum amyloid A-like 1	0.15385	2.55302	0	0.998063	1	unchanged
ENSMUSG00000006777	Krt23	keratin 23	-1.67908	-1.15276	-0.750848	0.235119	1	unchanged
ENSMUSG00000006782	Cnp	2',3'-cyclic nucleotide 3' phosphodiesterase	0.574099	4.30451	0	0.953213	1	unchanged
ENSMUSG00000006800	Sulf2	sulfatase 2	-1.6142	2.35096	-2.28124	0.0172399	0.183818	unchanged
ENSMUSG00000006818	Sod2	superoxide dismutase 2, mitochondrial	0.517628	8.33017	0	0.998667	1	unchanged
ENSMUSG00000006906	Stambp	STAM binding protein	0.332859	3.52819	0	0.999352	1	unchanged
ENSMUSG00000006920	Ezh1	enhancer of zeste 1 polycomb repressive complex 2 subunit	0.466949	3.92348	0	0.997754	1	unchanged
ENSMUSG00000006930	Hap1	huntingtin-associated protein 1	0.785856	1.03756	0	0.656329	1	unchanged
ENSMUSG00000006931	P3h4	prolyl 3-hydroxylase family member 4 (non-enzymatic)	-0.339476	0.685052	0	0.92147	1	unchanged
ENSMUSG00000006932	Ctnnb1	catenin beta 1	-0.0513699	7.80698	0	1	1	unchanged
ENSMUSG00000006941	Eif1b	eukaryotic translation initiation factor 1B	0.0221682	5.14631	0	1	1	unchanged
ENSMUSG00000006958	Chrd	chordin	0.624069	1.84751	0	0.839495	1	unchanged
ENSMUSG00000006998	Psmd2	proteasome (prosome, macropain) 26S subunit, non-ATPase, 2	0.433158	7.05563	0	0.999998	1	unchanged
ENSMUSG00000007029	Vars1	valyl-tRNA synthetase 1	0.773585	4.27244	0	0.899171	1	unchanged
ENSMUSG00000007030	Vwa7	von Willebrand factor A domain containing 7	2.61286	-0.947272	2.14348	0.0228113	0.229463	unchanged
ENSMUSG00000007035	Msh5	mutS homolog 5	-0.371168	-0.397692	0	0.852703	1	unchanged
ENSMUSG00000007036	Abhd16a	abhydrolase domain containing 16A	0.507213	5.5666	0	0.9993	1	unchanged
ENSMUSG00000007038	Neu1	neuraminidase 1	-0.0894816	5.27965	0	1	1	unchanged
ENSMUSG00000007039	Ddah2	DDAH family member 2, ADMA independent	0.760754	2.60984	0	0.848781	1	unchanged
ENSMUSG00000007041	Clic1	chloride intracellular channel 1	2.17393	4.64705	3.95974	0.000433407	0.0102793	upreg
ENSMUSG00000007050	Lsm2	LSM2 homolog, U6 small nuclear RNA and mRNA degradation associated	0.179178	3.88013	0	0.999694	1	unchanged
ENSMUSG00000007080	Pole	polymerase (DNA directed), epsilon	0.856257	1.53808	0	0.631975	1	unchanged
ENSMUSG00000007097	Atp1a2	ATPase, Na+/K+ transporting, alpha 2 polypeptide	-0.0251661	0.45402	0	0.991783	1	unchanged
ENSMUSG00000007216	Zfp775	zinc finger protein 775	-0.404934	1.95545	0	0.978582	1	unchanged
ENSMUSG00000007338	Mrpl49	mitochondrial ribosomal protein L49	-0.73955	4.56739	0	0.966915	1	unchanged
ENSMUSG00000007411	Mark3	MAP/microtubule affinity regulating kinase 3	-0.157015	5.05054	0	0.999998	1	unchanged
ENSMUSG00000007415	Gatad1	GATA zinc finger domain containing 1	-0.558127	5.77811	0	0.999437	1	unchanged
ENSMUSG00000007458	M6pr	mannose-6-phosphate receptor, cation dependent	0.562526	6.16175	0	0.997686	1	unchanged
ENSMUSG00000007476	Lrrc8a	leucine rich repeat containing 8A VRAC subunit A	0.148636	5.12051	0	0.999997	1	unchanged
ENSMUSG00000007564	Ppp2r1a	protein phosphatase 2, regulatory subunit A, alpha	0.209631	5.5615	0	0.999999	1	unchanged
ENSMUSG00000007570	Fance	Fanconi anemia, complementation group E	-0.646451	3.09953	0	0.96136	1	unchanged
ENSMUSG00000007589	Tinf2	Terf1 (TRF1)-interacting nuclear factor 2	0.235927	3.20869	0	0.998994	1	unchanged
ENSMUSG00000007594	Hapln4	hyaluronan and proteoglycan link protein 4	-0.117171	2.91323	0	0.994409	1	unchanged
ENSMUSG00000007603	Dus3l	dihydrouridine synthase 3 like	0.175499	2.67984	0	0.997614	1	unchanged
ENSMUSG00000007610	Gtpbp3	GTP binding protein 3	-0.331147	2.9747	0	0.997157	1	unchanged
ENSMUSG00000007613	Tgfbr1	transforming growth factor, beta receptor I	-0.0632213	3.85455	0	0.999987	1	unchanged
ENSMUSG00000007617	Homer1	homer scaffolding protein 1	-0.169908	3.29902	0	0.999894	1	unchanged
ENSMUSG00000007646	Rad51c	RAD51 paralog C	-0.529578	-0.400448	0	0.775155	1	unchanged
ENSMUSG00000007655	Cav1	caveolin 1, caveolae protein	-0.698087	1.0728	0	0.746955	1	unchanged
ENSMUSG00000007656	Arpp19	cAMP-regulated phosphoprotein 19	0.0172001	7.07475	0	1	1	unchanged
ENSMUSG00000007659	Bcl2l1	BCL2-like 1	0.307983	4.99105	0	0.999553	1	unchanged
ENSMUSG00000007670	Khsrp	KH-type splicing regulatory protein	-0.00386026	5.12092	0	1	1	unchanged
ENSMUSG00000007721	Ccdc124	coiled-coil domain containing 124	-0.208833	4.23052	0	0.999962	1	unchanged
ENSMUSG00000007739	Cct4	chaperonin containing TCP1 subunit 4	-0.200037	6.13203	0	0.999999	1	unchanged
ENSMUSG00000007777	Trappc2b	trafficking protein particle complex 2B	0.0720515	3.98071	0	0.999939	1	unchanged
ENSMUSG00000007812	Zfp655	zinc finger protein 655	-0.184901	4.21528	0	0.999979	1	unchanged
ENSMUSG00000007815	Rhoa	ras homolog family member A	0.0983592	6.90928	0	0.999978	1	unchanged
ENSMUSG00000007817	Zmiz1	zinc finger, MIZ-type containing 1	-0.169941	4.8781	0	0.999966	1	unchanged
ENSMUSG00000007827	Ankrd26	ankyrin repeat domain 26	-0.364772	2.34655	0	0.970317	1	unchanged
ENSMUSG00000007833	Aldh16a1	aldehyde dehydrogenase 16 family, member A1	-0.141537	5.39357	0	1	1	unchanged
ENSMUSG00000007836	Hnrnpa0	heterogeneous nuclear ribonucleoprotein A0	0.0540692	6.59927	0	1	1	unchanged
ENSMUSG00000007837	Prrg2	proline-rich Gla (G-carboxyglutamic acid) polypeptide 2	-0.400346	5.35018	0	0.999542	1	unchanged
ENSMUSG00000007850	Hnrnph1	heterogeneous nuclear ribonucleoprotein H1	0.0358394	3.17289	0	0.999837	1	unchanged
ENSMUSG00000007867	Ift43	intraflagellar transport 43	0.366318	2.36443	0	0.972219	1	unchanged
ENSMUSG00000007872	Id3	inhibitor of DNA binding 3	0.985986	7.10903	0	0.513884	1	unchanged
ENSMUSG00000007880	Arid1a	AT-rich interaction domain 1A	0.365475	4.96023	0	0.999894	1	unchanged
ENSMUSG00000007891	Ctsd	cathepsin D	0.891782	9.00996	0	0.837968	1	unchanged
ENSMUSG00000007892	Rplp1	ribosomal protein lateral stalk subunit P1	-0.151796	10.1304	0	1	1	unchanged
ENSMUSG00000007950	Abhd8	abhydrolase domain containing 8	-0.179319	1.73125	0	0.996598	1	unchanged
ENSMUSG00000007987	Ift22	intraflagellar transport 22	0.873312	2.29426	0	0.642349	1	unchanged
ENSMUSG00000008035	Mid1ip1	Mid1 interacting protein 1 (gastrulation specific G12-like (zebrafish))	-1.05296	5.52485	-0.157758	0.438176	1	unchanged
ENSMUSG00000008036	Ap2s1	adaptor-related protein complex 2, sigma 1 subunit	0.288382	5.56203	0	0.999948	1	unchanged
ENSMUSG00000008090	Fgfrl1	fibroblast growth factor receptor-like 1	-0.536257	4.2683	0	0.980517	1	unchanged
ENSMUSG00000008136	Fhl2	four and a half LIM domains 2	-0.119376	-0.363755	0	0.958426	1	unchanged
ENSMUSG00000008140	Emc10	ER membrane protein complex subunit 10	-0.263588	5.91457	0	0.999998	1	unchanged
ENSMUSG00000008153	Clstn3	calsyntenin 3	-1.50858	0.936868	-1.35831	0.0952913	0.691501	unchanged
ENSMUSG00000008167	Fbxw9	F-box and WD-40 domain protein 9	-0.398802	4.5475	0	0.998677	1	unchanged
ENSMUSG00000008193	Spib	Spi-B transcription factor (Spi-1/PU.1 related)	-1.59583	-0.262938	-0.804381	0.216872	1	unchanged
ENSMUSG00000008200	Fnbp4	formin binding protein 4	0.169833	3.63665	0	0.999956	1	unchanged
ENSMUSG00000008206	Cers4	ceramide synthase 4	-0.0856112	2.34517	0	0.999615	1	unchanged
ENSMUSG00000008226	Scrn3	secernin 3	-0.808878	4.50505	0	0.868347	1	unchanged
ENSMUSG00000008301	Phax	phosphorylated adaptor for RNA export	0.0190626	4.51666	0	1	1	unchanged
ENSMUSG00000008305	Tle1	transducin-like enhancer of split 1	-0.619819	4.86486	0	0.98906	1	unchanged
ENSMUSG00000008318	Relt	RELT tumor necrosis factor receptor	2.7776	0.966549	2.22814	0.0192738	0.20089	unchanged
ENSMUSG00000008333	Snrpb2	U2 small nuclear ribonucleoprotein B	0.410086	6.27893	0	0.999987	1	unchanged
ENSMUSG00000008348	Ubc	ubiquitin C	0.61116	10.7096	0	0.91235	1	unchanged
ENSMUSG00000008373	Prpf31	pre-mRNA processing factor 31	0.603153	3.49977	0	0.975423	1	unchanged
ENSMUSG00000008384	Sertad1	SERTA domain containing 1	0.942223	3.69588	0	0.593283	1	unchanged
ENSMUSG00000008393	Carhsp1	calcium regulated heat stable protein 1	-0.46616	5.50245	0	0.999788	1	unchanged
ENSMUSG00000008398	Elk3	ELK3, member of ETS oncogene family	0.164124	3.41731	0	0.999873	1	unchanged
ENSMUSG00000008429	Herpud2	HERPUD family member 2	-0.0770417	4.75598	0	0.999999	1	unchanged
ENSMUSG00000008435	Rdh13	retinol dehydrogenase 13 (all-trans and 9-cis)	0.0797854	2.95085	0	0.99929	1	unchanged
ENSMUSG00000008450	Nutf2	nuclear transport factor 2	0.0917527	1.93261	0	0.996717	1	unchanged
ENSMUSG00000008475	Arpc5	actin related protein 2/3 complex, subunit 5	0.656842	6.88106	0	0.99762	1	unchanged
ENSMUSG00000008496	Pou2f2	POU domain, class 2, transcription factor 2	2.65088	4.99526	4.74578	7.3814e-05	0.0025353	upreg
ENSMUSG00000008540	Mgst1	microsomal glutathione S-transferase 1	-0.795933	10.9765	0	0.932012	1	unchanged
ENSMUSG00000008575	Nfib	nuclear factor I/B	-0.804322	7.36426	0	0.93862	1	unchanged
ENSMUSG00000008604	Ubqln4	ubiquilin 4	-0.274768	3.92566	0	0.998823	1	unchanged
ENSMUSG00000008668	Rps18	ribosomal protein S18	0.0257517	8.06453	0	1	1	unchanged
ENSMUSG00000008682	Rpl10	ribosomal protein L10	-0.37204	6.65862	0	0.998521	1	unchanged
ENSMUSG00000008683	Rps15a	ribosomal protein S15A	0.263606	8.48478	0	0.999998	1	unchanged
ENSMUSG00000008690	Ncaph2	non-SMC condensin II complex, subunit H2	0.191142	4.92685	0	0.999995	1	unchanged
ENSMUSG00000008730	Hipk1	homeodomain interacting protein kinase 1	-0.181933	5.70907	0	0.999999	1	unchanged
ENSMUSG00000008734	Gprc5b	G protein-coupled receptor, family C, group 5, member B	2.13573	-0.752757	1.16113	0.13249	0.885361	unchanged
ENSMUSG00000008763	Man1a2	mannosidase, alpha, class 1A, member 2	-0.451992	5.14574	0	0.99968	1	unchanged
ENSMUSG00000008822	Acyp1	acylphosphatase 1	-0.692136	2.59129	0	0.876723	1	unchanged
ENSMUSG00000008843	Cldn13	claudin 13	-0.265293	-2.12672	0	0.89278	1	unchanged
ENSMUSG00000008845	Cd163	CD163 antigen	-2.78693	3.87322	-3.67614	0.0008236	0.0168508	downreg
ENSMUSG00000008855	Hdac5	histone deacetylase 5	-0.687325	4.45181	0	0.917227	1	unchanged
ENSMUSG00000008859	Rala	v-ral simian leukemia viral oncogene A (ras related)	0.0768476	6.23574	0	1	1	unchanged
ENSMUSG00000008892	Vdac3	voltage-dependent anion channel 3	-0.00674056	4.53297	0	1	1	unchanged
ENSMUSG00000008958	Vps72	vacuolar protein sorting 72	0.0700856	4.75121	0	0.999995	1	unchanged
ENSMUSG00000008976	Gabpa	GA repeat binding protein, alpha	-0.366103	2.92816	0	0.993843	1	unchanged
ENSMUSG00000008999	Bmp7	bone morphogenetic protein 7	-0.283115	-0.639523	0	0.891683	1	unchanged
ENSMUSG00000009013	Dynll1	dynein light chain LC8-type 1	1.39876	5.44852	2.47805	0.0114847	0.133097	unchanged
ENSMUSG00000009030	Pdcl	phosducin-like	-0.430639	3.68152	0	0.988942	1	unchanged
ENSMUSG00000009035	Tmem184b	transmembrane protein 184b	0.117865	3.56465	0	0.999931	1	unchanged
ENSMUSG00000009073	Nf2	neurofibromin 2	0.311211	4.22943	0	0.999921	1	unchanged
ENSMUSG00000009076	Zmat5	zinc finger, matrin type 5	0.170507	2.65765	0	0.995161	1	unchanged
ENSMUSG00000009079	Ewsr1	Ewing sarcoma breakpoint region 1	0.381972	4.77359	0	0.999339	1	unchanged
ENSMUSG00000009090	Ap1b1	adaptor protein complex AP-1, beta 1 subunit	0.334356	5.71738	0	0.999991	1	unchanged
ENSMUSG00000009092	Derl3	Der1-like domain family, member 3	1.85673	2.69127	1.28352	0.10773	0.756519	unchanged
ENSMUSG00000009108	Gnat2	G protein subunit alpha transducin 2	-0.389923	0.670371	0	0.898069	1	unchanged
ENSMUSG00000009112	Bcl2l13	BCL2 like 13	-0.521698	4.26843	0	0.996171	1	unchanged
ENSMUSG00000009145	Dqx1	DEAQ RNA-dependent ATPase	0.0174171	1.24961	0	0.999346	1	unchanged
ENSMUSG00000009185	Ccl8	C-C motif chemokine ligand 8	6.23975	3.46249	3.29304	0.00206433	0.0342969	upreg
ENSMUSG00000009207	Lnpk	lunapark, ER junction formation factor	0.0817663	2.18818	0	0.999084	1	unchanged
ENSMUSG00000009281	Rarres2	retinoic acid receptor responder (tazarotene induced) 2	-0.508212	9.11972	0	0.998015	1	unchanged
ENSMUSG00000009291	Pttg1ip	pituitary tumor-transforming 1 interacting protein	-0.396275	8.04674	0	0.999995	1	unchanged
ENSMUSG00000009292	Trpm2	transient receptor potential cation channel, subfamily M, member 2	2.58345	4.46656	3.97142	0.000422108	0.0100472	upreg
ENSMUSG00000009293	Ube2g2	ubiquitin-conjugating enzyme E2G 2	0.22644	5.19154	0	0.999912	1	unchanged
ENSMUSG00000009350	Mpo	myeloperoxidase	0.476596	-0.072024	0	0.909323	1	unchanged
ENSMUSG00000009376	Met	met proto-oncogene	-0.53916	5.32258	0	0.997479	1	unchanged
ENSMUSG00000009378	Slc16a12	solute carrier family 16 (monocarboxylic acid transporters), member 12	-0.594219	4.2941	0	0.943555	1	unchanged
ENSMUSG00000009406	Elk1	ELK1, member of ETS oncogene family	0.39528	2.54465	0	0.95162	1	unchanged
ENSMUSG00000009418	Nav1	neuron navigator 1	0.0875501	3.27521	0	0.999896	1	unchanged
ENSMUSG00000009470	Tnpo1	transportin 1	-0.0182157	4.83553	0	0.999999	1	unchanged
ENSMUSG00000009535	Rnmt	RNA (guanine-7-) methyltransferase	-0.0360602	3.65786	0	0.999982	1	unchanged
ENSMUSG00000009545	Kcnq1	potassium voltage-gated channel, subfamily Q, member 1	-0.228293	0.442196	0	0.948667	1	unchanged
ENSMUSG00000009549	Srp14	signal recognition particle 14	0.243414	5.83774	0	0.999996	1	unchanged
ENSMUSG00000009555	Cdk9	cyclin dependent kinase 9	-0.163237	2.925	0	0.999753	1	unchanged
ENSMUSG00000009563	Tor2a	torsin family 2, member A	0.129638	5.37679	0	1	1	unchanged
ENSMUSG00000009566	Fpgs	folylpolyglutamyl synthetase	-0.275958	6.57635	0	0.999989	1	unchanged
ENSMUSG00000009569	Mrtfb	myocardin related transcription factor B	-0.251519	4.49475	0	0.999703	1	unchanged
ENSMUSG00000009575	Cbx5	chromobox 5	0.547083	5.53449	0	0.997586	1	unchanged
ENSMUSG00000009585	Apobec3	apolipoprotein B mRNA editing enzyme, catalytic polypeptide 3	3.844	4.56539	7.5059	2.40661e-07	2.65891e-05	upreg
ENSMUSG00000009614	Sardh	sarcosine dehydrogenase	-1.30503	8.55137	-3.19225	0.00244164	0.0389077	downreg
ENSMUSG00000009621	Vav2	vav 2 oncogene	-0.016732	4.57465	0	0.999999	1	unchanged
ENSMUSG00000009630	Ppp2cb	protein phosphatase 2 (formerly 2A), catalytic subunit, beta isoform	0.13669	5.23376	0	0.999963	1	unchanged
ENSMUSG00000009633	G0s2	G0/G1 switch gene 2	-0.800262	5.05179	0	0.655222	1	unchanged
ENSMUSG00000009640	Dmap1	DNA methyltransferase 1-associated protein 1	-0.107465	2.9406	0	0.999658	1	unchanged
ENSMUSG00000009646	Pla2g12b	phospholipase A2, group XIIB	-0.0776323	5.99683	0	1	1	unchanged
ENSMUSG00000009647	Mcu	mitochondrial calcium uniporter	-0.95419	5.02112	0	0.604744	1	unchanged
ENSMUSG00000009654	Oit3	oncoprotein induced transcript 3	-1.12618	4.38385	-0.67767	0.253153	1	unchanged
ENSMUSG00000009681	Bcr	BCR activator of RhoGEF and GTPase	-0.236049	4.31288	0	0.999955	1	unchanged
ENSMUSG00000009687	Fxyd5	FXYD domain-containing ion transport regulator 5	3.56515	4.47695	8.04098	8.89715e-08	1.19867e-05	upreg
ENSMUSG00000009733	Tfcp2	transcription factor CP2	-0.122325	1.59705	0	0.990286	1	unchanged
ENSMUSG00000009739	Pou6f1	POU domain, class 6, transcription factor 1	0.39535	1.63465	0	0.964482	1	unchanged
ENSMUSG00000009741	Ubp1	upstream binding protein 1	-0.492139	5.45723	0	0.999749	1	unchanged
ENSMUSG00000009772	Nuak2	NUAK family, SNF1-like kinase, 2	1.28857	4.14216	1.11947	0.138578	0.910653	unchanged
ENSMUSG00000009828	Cilk1	ciliogenesis associated kinase 1	-0.322781	3.34485	0	0.999346	1	unchanged
ENSMUSG00000009863	Sdhb	succinate dehydrogenase complex, subunit B, iron sulfur (Ip)	-0.805279	8.41006	0	0.948269	1	unchanged
ENSMUSG00000009894	Snap47	synaptosomal-associated protein, 47	-0.244964	6.46106	0	0.999987	1	unchanged
ENSMUSG00000009905	Kdsr	3-ketodihydrosphingosine reductase	-0.671301	4.63888	0	0.976398	1	unchanged
ENSMUSG00000009907	Vps4b	vacuolar protein sorting 4B	-0.122433	5.7987	0	1	1	unchanged
ENSMUSG00000009927	Rps25	ribosomal protein S25	-0.0817994	8.94565	0	1	1	unchanged
ENSMUSG00000009995	Tafazzin	tafazzin, phospholipid-lysophospholipid transacylase	-0.469203	4.61418	0	0.999535	1	unchanged
ENSMUSG00000010025	Aldh3a2	aldehyde dehydrogenase family 3, subfamily A2	-2.23679	5.95177	-5.62992	1.06576e-05	0.000554109	downreg
ENSMUSG00000010045	Tmem115	transmembrane protein 115	-0.302743	3.88514	0	0.999887	1	unchanged
ENSMUSG00000010047	Hyal2	hyaluronoglucosaminidase 2	-0.230235	4.57609	0	0.99887	1	unchanged
ENSMUSG00000010048	Ifrd2	interferon-related developmental regulator 2	-0.539934	3.20595	0	0.973836	1	unchanged
ENSMUSG00000010051	Hyal1	hyaluronoglucosaminidase 1	-0.639311	4.72379	0	0.989452	1	unchanged
ENSMUSG00000010054	Tusc2	tumor suppressor 2, mitochondrial calcium regulator	-0.459593	5.48735	0	0.99971	1	unchanged
ENSMUSG00000010057	Nprl2	NPR2 like, GATOR1 complex subunit	-0.400103	3.57254	0	0.998767	1	unchanged
ENSMUSG00000010064	Slc38a3	solute carrier family 38, member 3	-0.451828	8.80681	0	0.999906	1	unchanged
ENSMUSG00000010067	Rassf1	Ras association (RalGDS/AF-6) domain family member 1	0.763355	3.99309	0	0.87824	1	unchanged
ENSMUSG00000010095	Slc3a2	solute carrier family 3 (activators of dibasic and neutral amino acid transport), member 2	0.295324	6.16918	0	0.999982	1	unchanged
ENSMUSG00000010097	Nxf1	nuclear RNA export factor 1	-0.00276189	5.21674	0	1	1	unchanged
ENSMUSG00000010110	Stx5a	syntaxin 5A	0.0878778	5.55687	0	0.999999	1	unchanged
ENSMUSG00000010122	Slc47a1	solute carrier family 47, member 1	-1.39149	6.12965	-1.98235	0.0311892	0.293683	unchanged
ENSMUSG00000010142	Tnfrsf13b	tumor necrosis factor receptor superfamily, member 13b	2.99317	0.664788	1.47958	0.0818862	0.615097	unchanged
ENSMUSG00000010175	Prox1	prospero homeobox 1	0.0882177	7.03621	0	0.999431	1	unchanged
ENSMUSG00000010205	Raver1	ribonucleoprotein, PTB-binding 1	0.588162	2.31923	0	0.827608	1	unchanged
ENSMUSG00000010277	Bltp2	bridge-like lipid transfer protein family member 2	-0.187659	5.79084	0	0.999999	1	unchanged
ENSMUSG00000010290	AI597479	expressed sequence AI597479	-0.49274	2.36773	0	0.95724	1	unchanged
ENSMUSG00000010307	Tmem86a	transmembrane protein 86A	2.04108	4.62256	3.51147	0.00119411	0.0227139	upreg
ENSMUSG00000010342	Tex14	testis expressed gene 14 intercellular bridge forming factor	0.891198	-0.379902	0	0.57737	1	unchanged
ENSMUSG00000010358	Ifi35	interferon-induced protein 35	1.4183	4.56873	2.17883	0.0211973	0.215186	unchanged
ENSMUSG00000010362	Rdm1	RAD52 motif 1	-0.921609	2.56528	0	0.619499	1	unchanged
ENSMUSG00000010376	Nedd8	neural precursor cell expressed, developmentally down-regulated gene 8	0.115299	7.54413	0	1	1	unchanged
ENSMUSG00000010392	Gosr1	golgi SNAP receptor complex member 1	0.625559	1.95191	0	0.848157	1	unchanged
ENSMUSG00000010406	Mrpl52	mitochondrial ribosomal protein L52	-0.240964	6.78095	0	1	1	unchanged
ENSMUSG00000010453	Kansl3	KAT8 regulatory NSL complex subunit 3	-0.0232409	5.29246	0	1	1	unchanged
ENSMUSG00000010517	Faf1	Fas-associated factor 1	-0.286848	4.79407	0	0.999934	1	unchanged
ENSMUSG00000010538	Tsacc	TSSK6 activating co-chaperone	-0.482768	1.75902	0	0.948607	1	unchanged
ENSMUSG00000010554	Mettl16	methyltransferase 16, N6-methyladenosine	0.270018	4.17308	0	0.999309	1	unchanged
ENSMUSG00000010601	Apol7a	apolipoprotein L 7a	-0.0472822	6.92812	0	0.999548	1	unchanged
ENSMUSG00000010607	Pigyl	phosphatidylinositol glycan anchor biosynthesis, class Y-like	-0.565322	4.72528	0	0.997967	1	unchanged
ENSMUSG00000010608	Rbm25	RNA binding motif protein 25	-0.159151	7.64827	0	1	1	unchanged
ENSMUSG00000010609	Psen2	presenilin 2	-0.559343	8.90958	0	0.993657	1	unchanged
ENSMUSG00000010651	Acaa1b	acetyl-Coenzyme A acyltransferase 1B	-3.78033	7.62913	-14.0865	1.09846e-11	9.80932e-09	downreg
ENSMUSG00000010660	Plcd1	phospholipase C, delta 1	1.3439	-0.00863789	0.453352	0.330829	1	unchanged
ENSMUSG00000010663	Fads1	fatty acid desaturase 1	-1.28265	7.58289	-1.79635	0.0443323	0.387703	unchanged
ENSMUSG00000010721	Lmbr1	limb region 1	-0.141744	2.2407	0	0.998043	1	unchanged
ENSMUSG00000010751	Tnfrsf22	tumor necrosis factor receptor superfamily, member 22	3.7792	-0.815872	3.01753	0.00362296	0.0527837	unchanged
ENSMUSG00000010755	Cars1	cysteinyl-tRNA synthetase 1	-0.600517	4.14511	0	0.977178	1	unchanged
ENSMUSG00000010760	Phlda2	pleckstrin homology like domain, family A, member 2	0.269158	0.604938	0	0.881373	1	unchanged
ENSMUSG00000010797	Wnt2	wingless-type MMTV integration site family, member 2	-0.777633	1.62537	0	0.690601	1	unchanged
ENSMUSG00000010911	Apip	APAF1 interacting protein	0.31111	4.40046	0	0.999872	1	unchanged
ENSMUSG00000010914	Pdhx	pyruvate dehydrogenase complex, component X	-0.322274	4.71739	0	0.999309	1	unchanged
ENSMUSG00000010936	Vac14	Vac14 homolog (S. cerevisiae)	-0.102865	3.32325	0	0.999835	1	unchanged
ENSMUSG00000011008	Mcoln2	mucolipin 2	4.19082	0.213323	3.078	0.00318734	0.0477489	upreg
ENSMUSG00000011034	Slc5a1	solute carrier family 5 (sodium/glucose cotransporter), member 1	-0.410397	0.200812	0	0.883528	1	unchanged
ENSMUSG00000011096	Akt1s1	AKT1 substrate 1	-0.147945	2.10255	0	0.996931	1	unchanged
ENSMUSG00000011114	Tbrg1	transforming growth factor beta regulated gene 1	0.570045	5.00495	0	0.982912	1	unchanged
ENSMUSG00000011148	Adss1	adenylosuccinate synthase 1	-0.450694	2.83765	0	0.952718	1	unchanged
ENSMUSG00000011158	Brf1	BRF1, RNA polymerase III transcription initiation factor 90 kDa subunit	-0.181292	3.18892	0	0.999805	1	unchanged
ENSMUSG00000011179	Odc1	ornithine decarboxylase, structural 1	-0.290272	2.90675	0	0.998101	1	unchanged
ENSMUSG00000011254	Thg1l	tRNA-histidine guanylyltransferase 1-like (S. cerevisiae)	0.307926	0.544337	0	0.931977	1	unchanged
ENSMUSG00000011256	Adam19	ADAM metallopeptidase domain 19	1.96593	1.62844	2.16982	0.0215839	0.218442	unchanged
ENSMUSG00000011257	Pabpc4	poly(A) binding protein, cytoplasmic 4	-0.440027	6.6223	0	0.999589	1	unchanged
ENSMUSG00000011263	Exoc3l2	exocyst complex component 3-like 2	0.288155	2.33106	0	0.985373	1	unchanged
ENSMUSG00000011305	Plin5	perilipin 5	-0.93501	5.24817	0	0.633367	1	unchanged
ENSMUSG00000011306	Sugp1	SURP and G patch domain containing 1	0.327206	3.21621	0	0.990903	1	unchanged
ENSMUSG00000011382	Dhdh	dihydrodiol dehydrogenase	-1.07701	4.28076	-0.456525	0.326644	1	unchanged
ENSMUSG00000011427	Zfp790	zinc finger protein 790	-0.286048	0.978945	0	0.974784	1	unchanged
ENSMUSG00000011658	Fuz	fuzzy planar cell polarity protein	-0.647202	2.06744	0	0.898872	1	unchanged
ENSMUSG00000011752	Pgam1	phosphoglycerate mutase 1	0.178539	2.22318	0	0.993181	1	unchanged
ENSMUSG00000011831	Evi5	ecotropic viral integration site 5	-0.935244	6.63697	0	0.696436	1	unchanged
ENSMUSG00000011832	Evi5l	ecotropic viral integration site 5 like	-0.0986474	1.83712	0	0.996261	1	unchanged
ENSMUSG00000011837	Snapc2	small nuclear RNA activating complex, polypeptide 2	0.17293	3.09863	0	0.999416	1	unchanged
ENSMUSG00000011877	Git1	GIT ArfGAP 1	0.614034	3.08062	0	0.94124	1	unchanged
ENSMUSG00000011884	Gltp	glycolipid transfer protein	2.12238	4.03705	3.55348	0.00108624	0.0211475	upreg
ENSMUSG00000011958	Bnip2	BCL2/adenovirus E1B interacting protein 2	0.309595	6.5427	0	0.999976	1	unchanged
ENSMUSG00000011960	Ccnt1	cyclin T1	0.286316	5.23189	0	0.999988	1	unchanged
ENSMUSG00000012017	Scarf2	scavenger receptor class F, member 2	-0.397609	1.27975	0	0.963797	1	unchanged
ENSMUSG00000012076	Brms1l	breast cancer metastasis-suppressor 1-like	0.738276	0.199014	0	0.675644	1	unchanged
ENSMUSG00000012114	Med15	mediator complex subunit 15	0.66483	4.75431	0	0.978982	1	unchanged
ENSMUSG00000012117	Dhdds	dehydrodolichyl diphosphate synthase	-0.0590589	4.57508	0	1	1	unchanged
ENSMUSG00000012123	Crybg2	crystallin beta-gamma domain containing 2	-0.989478	0.220112	0	0.508902	1	unchanged
ENSMUSG00000012296	Tjap1	tight junction associated protein 1	0.00715536	2.40357	0	0.999841	1	unchanged
ENSMUSG00000012405	Rpl15	ribosomal protein L15	-0.303541	4.67728	0	0.999951	1	unchanged
ENSMUSG00000012422	Tmem167	transmembrane protein 167	0.0322365	6.31244	0	1	1	unchanged
ENSMUSG00000012428	Steap4	STEAP family member 4	3.17358	7.28706	6.60772	1.39397e-06	9.92377e-05	upreg
ENSMUSG00000012429	Mplkip	M-phase specific PLK1 intereacting protein	0.155408	3.70421	0	0.999962	1	unchanged
ENSMUSG00000012443	Kif11	kinesin family member 11	2.73166	0.716056	2.27971	0.0173448	0.184556	unchanged
ENSMUSG00000012483	Rpa3	replication protein A3	-0.0645865	-0.163802	0	0.983401	1	unchanged
ENSMUSG00000012519	Mlkl	mixed lineage kinase domain-like	3.44421	3.29091	6.76661	1.01359e-06	8.09528e-05	upreg
ENSMUSG00000012535	Tnpo3	transportin 3	-0.120772	6.06935	0	0.999999	1	unchanged
ENSMUSG00000012609	Ttll5	tubulin tyrosine ligase-like family, member 5	-0.592659	2.14544	0	0.871238	1	unchanged
ENSMUSG00000012640	Zfp715	zinc finger protein 715	-0.149719	3.02913	0	0.998527	1	unchanged
ENSMUSG00000012705	Retn	resistin	0.58533	0.142584	0	0.722141	1	unchanged
ENSMUSG00000012848	Rps5	ribosomal protein S5	-0.241183	8.82284	0	1	1	unchanged
ENSMUSG00000012889	Podnl1	podocan-like 1	3.58048	0.211512	3.07353	0.00319278	0.0477764	upreg
ENSMUSG00000013033	Adgrl1	adhesion G protein-coupled receptor L1	-0.176556	3.06584	0	0.998959	1	unchanged
ENSMUSG00000013076	Amotl1	angiomotin-like 1	-0.553691	4.4883	0	0.993952	1	unchanged
ENSMUSG00000013089	Etv5	ets variant 5	0.744364	2.91322	0	0.773939	1	unchanged
ENSMUSG00000013150	Gfod2	glucose-fructose oxidoreductase domain containing 2	0.0831087	1.46413	0	0.996692	1	unchanged
ENSMUSG00000013155	Enkd1	enkurin domain containing 1	0.482639	0.225935	0	0.855166	1	unchanged
ENSMUSG00000013160	Atp6v0d1	ATPase, H+ transporting, lysosomal V0 subunit D1	0.139107	5.67858	0	0.999999	1	unchanged
ENSMUSG00000013236	Ptprs	protein tyrosine phosphatase receptor type S	-0.99292	1.24162	0	0.50739	1	unchanged
ENSMUSG00000013275	Slc41a1	solute carrier family 41, member 1	1.23611	2.39224	0.61639	0.272553	1	unchanged
ENSMUSG00000013419	Zbtb47	zinc finger and BTB domain containing 47	-0.123738	-0.670307	0	0.946223	1	unchanged
ENSMUSG00000013465	Nelfb	negative elongation factor complex member B	-0.0533604	3.92769	0	0.999994	1	unchanged
ENSMUSG00000013495	Tmem175	transmembrane protein 175	0.133549	3.65342	0	0.999861	1	unchanged
ENSMUSG00000013539	Tango2	transport and golgi organization 2	0.276592	5.53665	0	0.999997	1	unchanged
ENSMUSG00000013593	Ndufs2	NADH:ubiquinone oxidoreductase core subunit S2	-0.890278	7.21105	0	0.848444	1	unchanged
ENSMUSG00000013622	Atraid	all-trans retinoic acid induced differentiation factor	-0.491215	6.8434	0	0.99949	1	unchanged
ENSMUSG00000013629	Cad	carbamoyl-phosphate synthetase 2, aspartate transcarbamylase, and dihydroorotase	0.365889	3.62709	0	0.998519	1	unchanged
ENSMUSG00000013646	Sh3bp5l	SH3 binding domain protein 5 like	0.0842293	4.02751	0	0.999961	1	unchanged
ENSMUSG00000013662	Atad1	ATPase family, AAA domain containing 1	-0.140514	5.46611	0	1	1	unchanged
ENSMUSG00000013663	Pten	phosphatase and tensin homolog	-0.524857	5.68263	0	0.999594	1	unchanged
ENSMUSG00000013698	Pea15a	proliferation and apoptosis adaptor protein 15A	0.133399	5.1942	0	0.999998	1	unchanged
ENSMUSG00000013701	Timm23	translocase of inner mitochondrial membrane 23	-0.509191	0.62195	0	0.860131	1	unchanged
ENSMUSG00000013707	Tnfaip8l2	tumor necrosis factor, alpha-induced protein 8-like 2	2.62946	2.52203	3.59398	0.000991469	0.0197075	upreg
ENSMUSG00000013736	Trnt1	tRNA nucleotidyl transferase, CCA-adding, 1	-0.37048	2.35995	0	0.989388	1	unchanged
ENSMUSG00000013787	Ehmt2	euchromatic histone lysine N-methyltransferase 2	0.328836	4.56551	0	0.999707	1	unchanged
ENSMUSG00000013822	Elof1	ELF1 homolog, elongation factor 1	-0.212197	5.15192	0	0.999999	1	unchanged
ENSMUSG00000013833	Med16	mediator complex subunit 16	-0.0776326	3.52793	0	0.999989	1	unchanged
ENSMUSG00000013846	St3gal1	ST3 beta-galactoside alpha-2,3-sialyltransferase 1	-0.145871	6.56386	0	0.999991	1	unchanged
ENSMUSG00000013858	Tmem259	transmembrane protein 259	-0.253375	4.69019	0	0.999961	1	unchanged
ENSMUSG00000013878	Rnf170	ring finger protein 170	-0.468851	2.9768	0	0.991455	1	unchanged
ENSMUSG00000013921	Clip3	CAP-GLY domain containing linker protein 3	0.0656119	-0.518484	0	0.969796	1	unchanged
ENSMUSG00000013973	Dedd	death effector domain-containing	0.046412	4.5986	0	0.999999	1	unchanged
ENSMUSG00000013974	Mcemp1	mast cell expressed membrane protein 1	4.28443	1.0349	3.12858	0.00285165	0.043809	upreg
ENSMUSG00000013997	Nit1	nitrilase 1	-0.410355	5.25573	0	0.999843	1	unchanged
ENSMUSG00000014039	Prdm15	PR domain containing 15	-0.0568571	1.60954	0	0.996981	1	unchanged
ENSMUSG00000014074	Rnf168	ring finger protein 168	-0.0407157	4.57688	0	0.999998	1	unchanged
ENSMUSG00000014075	Dynlt2b	dynein light chain Tctex-type 2B	0.955788	1.62136	0	0.546416	1	unchanged
ENSMUSG00000014077	Chp1	calcineurin-like EF hand protein 1	-0.79802	7.74153	0	0.938436	1	unchanged
ENSMUSG00000014177	Tvp23b	trans-golgi network vesicle protein 23B	0.111237	4.58356	0	0.999999	1	unchanged
ENSMUSG00000014195	Dnajc7	DnaJ heat shock protein family (Hsp40) member C7	0.105022	5.02959	0	0.999993	1	unchanged
ENSMUSG00000014226	Cacybp	calcyclin binding protein	0.367147	5.26796	0	0.999883	1	unchanged
ENSMUSG00000014232	Cluap1	clusterin associated protein 1	-0.335057	2.66583	0	0.996101	1	unchanged
ENSMUSG00000014243	Zswim7	zinc finger SWIM-type containing 7	-0.611463	2.75241	0	0.936141	1	unchanged
ENSMUSG00000014245	Pigl	phosphatidylinositol glycan anchor biosynthesis, class L	0.587784	0.907872	0	0.824395	1	unchanged
ENSMUSG00000014294	Ndufa2	NADH:ubiquinone oxidoreductase subunit A2	-0.447999	8.57041	0	0.999981	1	unchanged
ENSMUSG00000014301	Pam16	presequence translocase-asssociated motor 16	-0.0806797	4.63641	0	0.999999	1	unchanged
ENSMUSG00000014303	Glis2	GLIS family zinc finger 2	0.286813	-0.147884	0	0.892491	1	unchanged
ENSMUSG00000014313	Cox6c	cytochrome c oxidase subunit 6C	-0.840876	9.17672	0	0.89541	1	unchanged
ENSMUSG00000014329	Bicc1	BicC family RNA binding protein 1	0.519383	3.18284	0	0.979231	1	unchanged
ENSMUSG00000014349	Ube2z	ubiquitin-conjugating enzyme E2Z	0.109788	4.72695	0	0.999995	1	unchanged
ENSMUSG00000014353	Tmem87b	transmembrane protein 87B	0.607129	5.74025	0	0.993137	1	unchanged
ENSMUSG00000014355	Anapc1	anaphase promoting complex subunit 1	0.0631484	4.10301	0	0.999997	1	unchanged
ENSMUSG00000014361	Mertk	MER proto-oncogene tyrosine kinase	1.02579	6.08363	0.152834	0.440086	1	unchanged
ENSMUSG00000014402	Tsg101	tumor susceptibility gene 101	-0.264502	4.30241	0	0.999992	1	unchanged
ENSMUSG00000014418	Hps5	HPS5, biogenesis of lysosomal organelles complex 2 subunit 2	0.194077	3.16751	0	0.999819	1	unchanged
ENSMUSG00000014426	Map3k4	mitogen-activated protein kinase kinase kinase 4	0.0856115	3.98522	0	0.999951	1	unchanged
ENSMUSG00000014444	Piezo1	piezo-type mechanosensitive ion channel component 1	1.27367	3.41689	0.983673	0.168936	1	unchanged
ENSMUSG00000014470	Rnf166	ring finger protein 166	0.272361	3.49391	0	0.999538	1	unchanged
ENSMUSG00000014496	Ankrd28	ankyrin repeat domain 28	-0.773158	1.90695	0	0.746806	1	unchanged
ENSMUSG00000014498	Ankrd52	ankyrin repeat domain 52	0.506978	0.62076	0	0.833662	1	unchanged
ENSMUSG00000014504	Srp19	signal recognition particle 19	0.369792	5.68839	0	0.999994	1	unchanged
ENSMUSG00000014542	Clec4f	C-type lectin domain family 4, member f	-0.0736683	5.99638	0	0.999382	1	unchanged
ENSMUSG00000014550	Rbsn	rabenosyn, RAB effector	0.038976	2.71525	0	0.999518	1	unchanged
ENSMUSG00000014551	Mrps25	mitochondrial ribosomal protein S25	-0.0478544	4.49161	0	1	1	unchanged
ENSMUSG00000014554	Dguok	deoxyguanosine kinase	-0.00821072	4.46185	0	0.999999	1	unchanged
ENSMUSG00000014592	Camta1	calmodulin binding transcription activator 1	-0.352516	2.36364	0	0.993987	1	unchanged
ENSMUSG00000014599	Csf1	colony stimulating factor 1 (macrophage)	1.9591	3.63554	3.41438	0.00148563	0.0265809	upreg
ENSMUSG00000014601	Strip1	striatin interacting protein 1	0.187883	4.38537	0	0.999991	1	unchanged
ENSMUSG00000014606	Slc25a11	solute carrier family 25 (mitochondrial carrier oxoglutarate carrier), member 11	-0.47666	6.11816	0	0.999795	1	unchanged
ENSMUSG00000014633	Cmc2	C-X9-C motif containing 2	-0.404537	4.26128	0	0.996864	1	unchanged
ENSMUSG00000014668	Chfr	checkpoint with forkhead and ring finger domains	0.0715114	3.56746	0	0.999826	1	unchanged
ENSMUSG00000014748	Tex261	testis expressed gene 261	-0.131656	6.72533	0	1	1	unchanged
ENSMUSG00000014763	Fam120b	family with sequence similarity 120, member B	0.122041	3.20945	0	0.999108	1	unchanged
ENSMUSG00000014767	Tbp	TATA box binding protein	-0.0439708	2.673	0	0.999546	1	unchanged
ENSMUSG00000014769	Psmb1	proteasome (prosome, macropain) subunit, beta type 1	0.18201	7.88158	0	1	1	unchanged
ENSMUSG00000014771	Pdcd2	programmed cell death 2	-0.379012	3.71069	0	0.997714	1	unchanged
ENSMUSG00000014773	Dll1	delta like canonical Notch ligand 1	0.00527072	-0.34077	0	0.997606	1	unchanged
ENSMUSG00000014776	Nol3	nucleolar protein 3 (apoptosis repressor with CARD domain)	1.58802	1.60164	1.39001	0.0904558	0.663676	unchanged
ENSMUSG00000014778	Fhod1	formin homology 2 domain containing 1	0.343696	2.72626	0	0.979233	1	unchanged
ENSMUSG00000014791	Elmo3	engulfment and cell motility 3	-0.3398	2.83484	0	0.99261	1	unchanged
ENSMUSG00000014813	Stc1	stanniocalcin 1	2.55096	0.15327	1.77681	0.0463003	0.399381	unchanged
ENSMUSG00000014837	Matcap1	microtubule associated tyrosine carboxypeptidase 1	0.17007	0.323781	0	0.945879	1	unchanged
ENSMUSG00000014846	Tppp3	tubulin polymerization-promoting protein family member 3	0.583619	-0.0174685	0	0.72299	1	unchanged
ENSMUSG00000014850	Msh3	mutS homolog 3	-0.669286	3.41939	0	0.952511	1	unchanged
ENSMUSG00000014856	Tmem208	transmembrane protein 208	-0.367421	5.185	0	0.999965	1	unchanged
ENSMUSG00000014859	E2f4	E2F transcription factor 4	0.255716	3.74659	0	0.998733	1	unchanged
ENSMUSG00000014867	Surf4	surfeit gene 4	0.077009	7.79077	0	1	1	unchanged
ENSMUSG00000014873	Surf2	surfeit gene 2	0.091759	3.62217	0	0.999773	1	unchanged
ENSMUSG00000014905	Dnajb9	DnaJ heat shock protein family (Hsp40) member B9	0.217425	5.2214	0	0.999287	1	unchanged
ENSMUSG00000014907	Naf1	nuclear assembly factor 1 ribonucleoprotein	-0.289814	2.6721	0	0.995716	1	unchanged
ENSMUSG00000014932	Yes1	YES proto-oncogene 1, Src family tyrosine kinase	-0.160979	2.28244	0	0.997807	1	unchanged
ENSMUSG00000014956	Ppp1cb	protein phosphatase 1 catalytic subunit beta	-0.182729	5.88299	0	0.99998	1	unchanged
ENSMUSG00000014959	Gorasp2	golgi reassembly stacking protein 2	-0.165866	6.48559	0	0.999999	1	unchanged
ENSMUSG00000014980	Tsen15	tRNA splicing endonuclease subunit 15	-0.0806574	2.7136	0	0.999834	1	unchanged
ENSMUSG00000015002	Efr3a	EFR3 homolog A	0.0942184	5.83677	0	1	1	unchanged
ENSMUSG00000015013	Trappc2l	trafficking protein particle complex 2L	0.343707	4.94368	0	0.999991	1	unchanged
ENSMUSG00000015016	Acsf3	acyl-CoA synthetase family member 3	-1.00085	3.43538	-0.00427892	0.498316	1	unchanged
ENSMUSG00000015023	Ddx19a	DEAD box helicase 19a	-0.162204	3.6715	0	0.999677	1	unchanged
ENSMUSG00000015027	Galns	galactosamine (N-acetyl)-6-sulfatase	0.539948	2.59338	0	0.896911	1	unchanged
ENSMUSG00000015053	Gata2	GATA binding protein 2	0.581182	0.373479	0	0.789822	1	unchanged
ENSMUSG00000015083	C8g	complement component 8, gamma polypeptide	-1.30916	8.04554	-2.54574	0.0099622	0.118139	unchanged
ENSMUSG00000015085	Entpd2	ectonucleoside triphosphate diphosphohydrolase 2	0.477225	1.73762	0	0.882369	1	unchanged
ENSMUSG00000015087	Rabl6	RAB, member RAS oncogene family-like 6	0.279056	5.40466	0	0.999893	1	unchanged
ENSMUSG00000015090	Ptgds	prostaglandin D2 synthase (brain)	-1.67359	1.30119	-1.04657	0.154618	0.990783	unchanged
ENSMUSG00000015092	Edf1	endothelial differentiation-related factor 1	-0.273373	7.94228	0	0.999974	1	unchanged
ENSMUSG00000015094	Npdc1	neural proliferation, differentiation and control 1	1.10686	2.52926	0.39543	0.348508	1	unchanged
ENSMUSG00000015095	Fbxw5	F-box and WD-40 domain protein 5	-0.106382	3.63337	0	0.999987	1	unchanged
ENSMUSG00000015112	Slc25a13	solute carrier family 25 (mitochondrial carrier, adenine nucleotide translocator), member 13	-0.918648	7.04351	0	0.682634	1	unchanged
ENSMUSG00000015120	Ube2i	ubiquitin-conjugating enzyme E2I	-0.0116642	0.0754476	0	0.996873	1	unchanged
ENSMUSG00000015126	Tsr3	TSR3 20S rRNA accumulation	-0.101862	4.71895	0	1	1	unchanged
ENSMUSG00000015127	Unkl	unkempt family like zinc finger	-0.355388	1.44749	0	0.926021	1	unchanged
ENSMUSG00000015133	Lrrk1	leucine-rich repeat kinase 1	1.07565	4.53952	0.49666	0.312617	1	unchanged
ENSMUSG00000015143	Actn1	actinin, alpha 1	0.822148	6.41755	0	0.868323	1	unchanged
ENSMUSG00000015149	Sirt2	sirtuin 2	0.0581858	5.47277	0	1	1	unchanged
ENSMUSG00000015165	Hnrnpl	heterogeneous nuclear ribonucleoprotein L	0.293557	4.96575	0	0.999953	1	unchanged
ENSMUSG00000015176	Nolc1	nucleolar and coiled-body phosphoprotein 1	0.048278	4.62895	0	0.999992	1	unchanged
ENSMUSG00000015189	Casd1	CAS1 domain containing 1	-0.998414	3.67941	0	0.503427	1	unchanged
ENSMUSG00000015202	Cnksr3	Cnksr family member 3	-0.894178	2.16458	0	0.652688	1	unchanged
ENSMUSG00000015214	Mtmr1	myotubularin related protein 1	-0.309282	3.44785	0	0.999643	1	unchanged
ENSMUSG00000015217	Hmgb3	high mobility group box 3	-0.2964	3.50409	0	0.998431	1	unchanged
ENSMUSG00000015222	Map2	microtubule-associated protein 2	0.103646	0.0388065	0	0.968381	1	unchanged
ENSMUSG00000015224	Cyp2j9	cytochrome P450, family 2, subfamily j, polypeptide 9	-2.27058	1.40784	-2.79765	0.00581315	0.0773027	unchanged
ENSMUSG00000015243	Abca1	ATP-binding cassette, sub-family A member 1	0.22909	6.68436	0	0.999948	1	unchanged
ENSMUSG00000015247	Nipsnap3b	nipsnap homolog 3B	-0.274813	5.53094	0	0.999826	1	unchanged
ENSMUSG00000015289	Lage3	L antigen family, member 3	-0.261324	4.86589	0	0.999941	1	unchanged
ENSMUSG00000015290	Ubl4a	ubiquitin-like 4A	-0.0532849	5.53751	0	1	1	unchanged
ENSMUSG00000015291	Gdi1	GDP dissociation inhibitor 1	0.0712014	4.50724	0	0.999999	1	unchanged
ENSMUSG00000015305	Sash1	SAM and SH3 domain containing 1	0.0434344	5.2598	0	0.999999	1	unchanged
ENSMUSG00000015312	Gadd45b	growth arrest and DNA-damage-inducible 45 beta	2.2722	2.09783	2.36777	0.0144444	0.160928	unchanged
ENSMUSG00000015314	Slamf6	SLAM family member 6	4.21516	1.31724	4.0161	0.00038317	0.00928714	upreg
ENSMUSG00000015316	Slamf1	signaling lymphocytic activation molecule family member 1	3.73876	-0.535218	3.06469	0.00326157	0.0485319	upreg
ENSMUSG00000015335	Zdhhc12	zinc finger, DHHC domain containing 12	0.299365	4.49016	0	0.999872	1	unchanged
ENSMUSG00000015337	Endog	endonuclease G	-0.559438	5.40927	0	0.997194	1	unchanged
ENSMUSG00000015340	Cybb	cytochrome b-245, beta polypeptide	3.08015	6.90312	10.8331	8.80219e-10	2.65226e-07	upreg
ENSMUSG00000015341	Golga7	golgin A7	-0.0608938	2.88463	0	0.999898	1	unchanged
ENSMUSG00000015342	Xk	X-linked Kx blood group	0.0657208	2.14271	0	0.992449	1	unchanged
ENSMUSG00000015354	Pcolce2	procollagen C-endopeptidase enhancer 2	0.0820887	2.22853	0	0.995856	1	unchanged
ENSMUSG00000015355	Cd48	CD48 antigen	2.83007	3.03887	4.84202	5.95808e-05	0.00215826	upreg
ENSMUSG00000015357	Clpx	caseinolytic mitochondrial matrix peptidase chaperone subunit	-0.690575	6.22075	0	0.944401	1	unchanged
ENSMUSG00000015363	Trabd	TraB domain containing	-0.321832	6.47381	0	0.999939	1	unchanged
ENSMUSG00000015377	Dennd6b	DENN domain containing 6B	0.0358459	1.46959	0	0.999669	1	unchanged
ENSMUSG00000015396	Cd83	CD83 antigen	1.62064	1.59429	1.46267	0.0801106	0.605669	unchanged
ENSMUSG00000015437	Gzmb	granzyme B	7.86739	2.11464	5.85297	6.848e-06	0.000387805	upreg
ENSMUSG00000015451	C4a	complement C4A (Rodgers blood group)	0.505305	3.29098	0	0.918238	1	unchanged
ENSMUSG00000015461	Atf6b	activating transcription factor 6 beta	0.729406	5.22812	0	0.980506	1	unchanged
ENSMUSG00000015467	Egfl8	EGF-like domain 8	0.31821	1.03948	0	0.902832	1	unchanged
ENSMUSG00000015468	Notch4	notch 4	-0.0961417	1.3908	0	0.988645	1	unchanged
ENSMUSG00000015474	Ppt2	palmitoyl-protein thioesterase 2	0.121831	4.93712	0	0.999978	1	unchanged
ENSMUSG00000015478	Rnf5	ring finger protein 5	-0.766501	2.52156	0	0.798062	1	unchanged
ENSMUSG00000015488	Cacfd1	calcium channel flower domain containing 1	-0.195574	5.23795	0	0.999997	1	unchanged
ENSMUSG00000015501	Hivep2	human immunodeficiency virus type I enhancer binding protein 2	0.667842	3.48381	0	0.886501	1	unchanged
ENSMUSG00000015522	Arnt	aryl hydrocarbon receptor nuclear translocator	-0.175509	4.06603	0	0.999976	1	unchanged
ENSMUSG00000015536	Mocs2	molybdenum cofactor synthesis 2	-0.298598	6.76531	0	0.999991	1	unchanged
ENSMUSG00000015542	Nat9	N-acetyltransferase 9 (GCN5-related, putative)	0.0342634	3.72011	0	0.999937	1	unchanged
ENSMUSG00000015568	Lpl	lipoprotein lipase	1.1145	7.40965	0.524717	0.302982	1	unchanged
ENSMUSG00000015575	Atp6v0e	ATPase, H+ transporting, lysosomal V0 subunit E	0.806505	6.77056	0	0.954202	1	unchanged
ENSMUSG00000015597	Zfp318	zinc finger protein 318	-0.325187	4.95125	0	0.999954	1	unchanged
ENSMUSG00000015605	Srf	serum response factor	0.498302	3.85474	0	0.963512	1	unchanged
ENSMUSG00000015619	Gata3	GATA binding protein 3	1.7042	0.204787	0.950698	0.177833	1	unchanged
ENSMUSG00000015647	Lama5	laminin, alpha 5	0.561673	0.693496	0	0.799046	1	unchanged
ENSMUSG00000015652	Steap1	six transmembrane epithelial antigen of the prostate 1	1.67827	-0.796214	0.818634	0.213901	1	unchanged
ENSMUSG00000015653	Steap2	six transmembrane epithelial antigen of prostate 2	0.628788	2.61892	0	0.881458	1	unchanged
ENSMUSG00000015656	Hspa8	heat shock protein 8	0.248637	8.8021	0	0.999949	1	unchanged
ENSMUSG00000015668	Pdzd11	PDZ domain containing 11	0.383036	3.68033	0	0.997267	1	unchanged
ENSMUSG00000015671	Psma2	proteasome subunit alpha 2	0.423497	7.82915	0	0.999951	1	unchanged
ENSMUSG00000015672	Mrpl32	mitochondrial ribosomal protein L32	-0.256705	3.61024	0	0.999102	1	unchanged
ENSMUSG00000015697	Setdb1	SET domain, bifurcated 1	0.00648108	2.82637	0	0.999923	1	unchanged
ENSMUSG00000015702	Anxa9	annexin A9	1.65314	0.860376	1.28477	0.107331	0.754507	unchanged
ENSMUSG00000015711	Prune1	prune exopolyphosphatase	0.185586	3.79283	0	0.999366	1	unchanged
ENSMUSG00000015714	Cers2	ceramide synthase 2	-0.482517	7.75917	0	0.996106	1	unchanged
ENSMUSG00000015733	Capza2	capping actin protein of muscle Z-line subunit alpha 2	0.461073	5.94886	0	0.999978	1	unchanged
ENSMUSG00000015745	Plekho1	pleckstrin homology domain containing, family O member 1	1.77276	3.84878	2.53	0.0102983	0.121472	unchanged
ENSMUSG00000015747	Vps45	vacuolar protein sorting 45	0.280407	2.66919	0	0.996354	1	unchanged
ENSMUSG00000015748	Prpf3	pre-mRNA processing factor 3	0.413829	3.749	0	0.997869	1	unchanged
ENSMUSG00000015749	Anp32e	acidic nuclear phosphoprotein 32 family member E	0.275156	4.76213	0	0.999827	1	unchanged
ENSMUSG00000015750	Aph1a	aph1 homolog A, gamma secretase subunit	-0.207823	4.05436	0	0.99987	1	unchanged
ENSMUSG00000015755	Tab2	TGF-beta activated kinase 1/MAP3K7 binding protein 2	0.283942	6.51721	0	0.999996	1	unchanged
ENSMUSG00000015757	Ppil4	peptidylprolyl isomerase (cyclophilin)-like 4	0.227412	4.78326	0	0.999975	1	unchanged
ENSMUSG00000015759	Cnih1	cornichon family AMPA receptor auxiliary protein 1	-0.449476	6.09471	0	0.999966	1	unchanged
ENSMUSG00000015766	Eps8	epidermal growth factor receptor pathway substrate 8	2.76569	1.03368	2.27092	0.0176648	0.18721	unchanged
ENSMUSG00000015776	Med22	mediator complex subunit 22	0.0943103	3.83088	0	0.99995	1	unchanged
ENSMUSG00000015790	Surf1	surfeit gene 1	-0.328659	5.04682	0	0.99992	1	unchanged
ENSMUSG00000015804	Med28	mediator complex subunit 28	1.13696	6.94039	1.11422	0.139673	0.917176	unchanged
ENSMUSG00000015806	Qdpr	quinoid dihydropteridine reductase	-1.45507	8.44771	-2.96324	0.00405106	0.0573201	unchanged
ENSMUSG00000015812	Gnrh1	gonadotropin releasing hormone 1	-0.162749	-0.111909	0	0.956243	1	unchanged
ENSMUSG00000015837	Sqstm1	sequestosome 1	0.176028	8.50687	0	0.99999	1	unchanged
ENSMUSG00000015839	Nfe2l2	nuclear factor, erythroid derived 2, like 2	0.0793414	6.08557	0	0.999996	1	unchanged
ENSMUSG00000015843	Rxrg	retinoid X receptor gamma	1.00936	2.28854	0.0289277	0.488618	1	unchanged
ENSMUSG00000015846	Rxra	retinoid X receptor alpha	-0.270372	7.35847	0	0.999997	1	unchanged
ENSMUSG00000015850	Adamtsl4	ADAMTS-like 4	0.131498	1.58787	0	0.988783	1	unchanged
ENSMUSG00000015854	Cd5l	CD5 antigen-like	2.31489	8.71224	7.71655	1.61889e-07	1.96911e-05	upreg
ENSMUSG00000015869	Prpsap1	phosphoribosyl pyrophosphate synthetase-associated protein 1	-0.260471	5.80787	0	0.999995	1	unchanged
ENSMUSG00000015880	Ncapg	non-SMC condensin I complex, subunit G	2.74629	1.27511	2.35785	0.0147755	0.164202	unchanged
ENSMUSG00000015882	Lcorl	ligand dependent nuclear receptor corepressor-like	-0.974075	3.61968	0	0.556765	1	unchanged
ENSMUSG00000015889	Lta4h	leukotriene A4 hydrolase	0.0898703	4.20331	0	0.999994	1	unchanged
ENSMUSG00000015890	Amdhd1	amidohydrolase domain containing 1	-1.30337	6.84014	-2.02275	0.0288421	0.275747	unchanged
ENSMUSG00000015932	Dstn	destrin	-0.00460371	5.1625	0	0.999998	1	unchanged
ENSMUSG00000015937	Macroh2a1	macroH2A.1 histone	-0.000593892	6.83963	0	1	1	unchanged
ENSMUSG00000015942	Gtf2ird2	GTF2I repeat domain containing 2	-1.05196	1.94651	-0.18689	0.426883	1	unchanged
ENSMUSG00000015943	Bola1	bolA family member 1	-0.61004	4.61004	0	0.988671	1	unchanged
ENSMUSG00000015944	Castor2	cytosolic arginine sensor for mTORC1 subunit 2	0.774646	2.45418	0	0.736066	1	unchanged
ENSMUSG00000015947	Fcgr1	Fc receptor, IgG, high affinity I	3.31133	4.28123	6.47037	1.84119e-06	0.000123911	upreg
ENSMUSG00000015950	Ncf1	neutrophil cytosolic factor 1	2.83303	4.44228	3.91363	0.000481174	0.0111718	upreg
ENSMUSG00000015961	Adss2	adenylosuccinate synthase 2	-0.0757186	4.84481	0	0.999999	1	unchanged
ENSMUSG00000015966	Il17rb	interleukin 17 receptor B	0.175902	3.39993	0	0.999845	1	unchanged
ENSMUSG00000015968	Cacna1d	calcium channel, voltage-dependent, L type, alpha 1D subunit	-2.27407	-0.742912	-1.41834	0.0871804	0.643562	unchanged
ENSMUSG00000015970	Chdh	choline dehydrogenase	-0.780485	6.22514	0	0.924945	1	unchanged
ENSMUSG00000015971	Actr8	ARP8 actin-related protein 8	-0.447398	4.23296	0	0.999505	1	unchanged
ENSMUSG00000015981	Stk32c	serine/threonine kinase 32C	1.08289	-0.204146	0.127684	0.452239	1	unchanged
ENSMUSG00000015994	Fnta	farnesyltransferase, CAAX box, alpha	-0.246104	5.46671	0	0.999983	1	unchanged
ENSMUSG00000016018	Mtrex	Mtr4 exosome RNA helicase	0.0793533	4.76679	0	1	1	unchanged
ENSMUSG00000016024	Lbp	lipopolysaccharide binding protein	2.14052	7.90886	6.67337	1.22142e-06	9.15555e-05	upreg
ENSMUSG00000016028	Celsr1	cadherin, EGF LAG seven-pass G-type receptor 1	-0.453456	3.74366	0	0.992471	1	unchanged
ENSMUSG00000016087	Fli1	Friend leukemia integration 1	1.07176	3.66133	0.264465	0.397162	1	unchanged
ENSMUSG00000016128	Stard13	StAR related lipid transfer domain containing 13	-0.512171	3.24019	0	0.995594	1	unchanged
ENSMUSG00000016181	Utp25	UTP25 small subunit processome component	-0.126602	2.4162	0	0.998555	1	unchanged
ENSMUSG00000016194	Hsd11b1	hydroxysteroid 11-beta dehydrogenase 1	-0.989759	8.19351	0	0.526426	1	unchanged
ENSMUSG00000016206	H2-M3	histocompatibility 2, M region locus 3	2.31113	2.35296	3.00313	0.00371126	0.053716	unchanged
ENSMUSG00000016239	Lonrf3	LON peptidase N-terminal domain and ring finger 3	-0.766255	-0.268534	0	0.662198	1	unchanged
ENSMUSG00000016252	Atp5f1e	ATP synthase F1 subunit epsilon	-0.66356	7.84329	0	0.99672	1	unchanged
ENSMUSG00000016253	Nelfcd	negative elongation factor complex member C/D, Th1l	-0.328928	5.22944	0	0.996387	1	unchanged
ENSMUSG00000016256	Ctsz	cathepsin Z	0.898364	7.71638	0	0.795486	1	unchanged
ENSMUSG00000016257	Prelid3b	PRELI domain containing 3B	0.0914113	5.45063	0	1	1	unchanged
ENSMUSG00000016283	H2-M2	histocompatibility 2, M region locus 2	1.22586	1.51815	0.1828	0.472375	1	unchanged
ENSMUSG00000016308	Ube2a	ubiquitin-conjugating enzyme E2A	-0.393984	5.23442	0	0.999951	1	unchanged
ENSMUSG00000016319	Slc25a5	solute carrier family 25 (mitochondrial carrier, adenine nucleotide translocator), member 5	-0.455731	7.38392	0	0.996774	1	unchanged
ENSMUSG00000016344	Ppdpf	pancreatic progenitor cell differentiation and proliferation factor	-0.861935	3.85201	0	0.823443	1	unchanged
ENSMUSG00000016382	Pls3	plastin 3 (T-isoform)	-0.226869	5.947	0	0.999944	1	unchanged
ENSMUSG00000016409	Nkap	NFKB activating protein	-0.00468185	4.41644	0	1	1	unchanged
ENSMUSG00000016427	Ndufa1	NADH:ubiquinone oxidoreductase subunit A1	-0.848196	6.94532	0	0.886584	1	unchanged
ENSMUSG00000016477	E2f3	E2F transcription factor 3	0.604408	2.57434	0	0.942843	1	unchanged
ENSMUSG00000016481	Cr1l	complement C3b/C4b receptor 1 like	-0.191248	5.83911	0	1	1	unchanged
ENSMUSG00000016487	Ppfibp1	PTPRF interacting protein, binding protein 1 (liprin beta 1)	0.305559	3.75721	0	0.999839	1	unchanged
ENSMUSG00000016493	Cd46	CD46 antigen, complement regulatory protein	-0.211885	-0.568673	0	0.924027	1	unchanged
ENSMUSG00000016494	Cd34	CD34 antigen	0.756477	1.70877	0	0.746071	1	unchanged
ENSMUSG00000016495	Plgrkt	plasminogen receptor, C-terminal lysine transmembrane protein	1.87858	3.61292	3.25468	0.00212445	0.0349454	upreg
ENSMUSG00000016496	Cd274	CD274 antigen	5.85827	2.91541	5.25364	2.43364e-05	0.00106839	upreg
ENSMUSG00000016498	Pdcd1lg2	programmed cell death 1 ligand 2	4.50407	-0.623882	4.34671	0.000181592	0.00506839	upreg
ENSMUSG00000016503	Gtf3a	general transcription factor III A	-0.699894	3.38095	0	0.888618	1	unchanged
ENSMUSG00000016510	Mtif3	mitochondrial translational initiation factor 3	-0.863604	4.23072	0	0.768267	1	unchanged
ENSMUSG00000016520	Lnx2	ligand of numb-protein X 2	-0.0924239	4.29129	0	0.999998	1	unchanged
ENSMUSG00000016526	Dyrk3	dual-specificity tyrosine phosphorylation regulated kinase 3	1.32059	0.434466	0.522666	0.304328	1	unchanged
ENSMUSG00000016528	Mapkapk2	MAP kinase-activated protein kinase 2	0.467235	6.41297	0	0.999873	1	unchanged
ENSMUSG00000016529	Il10	interleukin 10	4.25785	0.0882184	2.55675	0.0100307	0.118739	unchanged
ENSMUSG00000016534	Lamp2	lysosomal-associated membrane protein 2	-0.357841	8.709	0	0.999998	1	unchanged
ENSMUSG00000016541	Atxn10	ataxin 10	-0.148189	5.56219	0	0.999995	1	unchanged
ENSMUSG00000016554	Eif3d	eukaryotic translation initiation factor 3, subunit D	0.141542	6.16443	0	1	1	unchanged
ENSMUSG00000016559	H3f3b	H3.3 histone B	0.427297	7.10385	0	0.999801	1	unchanged
ENSMUSG00000016619	Nup50	nucleoporin 50	0.324288	5.11805	0	0.999987	1	unchanged
ENSMUSG00000016637	Ift27	intraflagellar transport 27	-0.297923	2.85577	0	0.999605	1	unchanged
ENSMUSG00000016664	Pacsin2	protein kinase C and casein kinase substrate in neurons 2	-0.126984	3.72331	0	0.999951	1	unchanged
ENSMUSG00000016756	Cmah	cytidine monophospho-N-acetylneuraminic acid hydroxylase	-1.08886	4.75685	-0.508459	0.308548	1	unchanged
ENSMUSG00000016757	Ttll12	tubulin tyrosine ligase-like family, member 12	-0.188874	2.92654	0	0.996623	1	unchanged
ENSMUSG00000016758	Bik	BCL2-interacting killer	-0.741974	0.955175	0	0.787807	1	unchanged
ENSMUSG00000016831	Tox4	TOX high mobility group box family member 4	0.399215	4.94483	0	0.999877	1	unchanged
ENSMUSG00000016833	Mrps18c	mitochondrial ribosomal protein S18C	-0.236598	5.29303	0	0.999992	1	unchanged
ENSMUSG00000016921	Srsf6	serine and arginine-rich splicing factor 6	-0.196529	5.83006	0	0.999999	1	unchanged
ENSMUSG00000016933	Plcg1	phospholipase C, gamma 1	-0.502686	4.3887	0	0.979269	1	unchanged
ENSMUSG00000016940	Kctd2	potassium channel tetramerisation domain containing 2	-0.280748	4.74083	0	0.999872	1	unchanged
ENSMUSG00000016942	Tmprss6	transmembrane serine protease 6	-1.07827	7.16694	-0.713347	0.242234	1	unchanged
ENSMUSG00000016946	Kctd5	potassium channel tetramerisation domain containing 5	0.880254	1.98381	0	0.663031	1	unchanged
ENSMUSG00000016984	Etaa1	Ewing tumor-associated antigen 1	-0.410444	1.7521	0	0.949668	1	unchanged
ENSMUSG00000017002	Slpi	secretory leukocyte peptidase inhibitor	3.0216	4.69778	2.66388	0.00777342	0.0977799	unchanged
ENSMUSG00000017009	Sdc4	syndecan 4	0.00609428	7.25053	0	1	1	unchanged
ENSMUSG00000017057	Il13ra1	interleukin 13 receptor, alpha 1	0.750446	5.28953	0	0.932816	1	unchanged
ENSMUSG00000017119	Nbr1	NBR1, autophagy cargo receptor	-0.130511	6.63557	0	1	1	unchanged
ENSMUSG00000017132	Cyth1	cytohesin 1	0.825554	2.88849	0	0.722989	1	unchanged
ENSMUSG00000017144	Rnd3	Rho family GTPase 3	0.0440197	2.1359	0	0.99821	1	unchanged
ENSMUSG00000017146	Brca1	breast cancer 1, early onset	1.74983	1.54716	1.32009	0.101454	0.724326	unchanged
ENSMUSG00000017167	Cntnap1	contactin associated protein-like 1	-0.42538	-1.20181	0	0.803186	1	unchanged
ENSMUSG00000017176	Nt5c3b	5'-nucleotidase, cytosolic IIIB	0.943685	0.89964	0	0.546883	1	unchanged
ENSMUSG00000017188	Coa3	cytochrome C oxidase assembly factor 3	-0.193392	5.91677	0	0.999996	1	unchanged
ENSMUSG00000017210	Med24	mediator complex subunit 24	0.304828	2.53151	0	0.992733	1	unchanged
ENSMUSG00000017221	Psmd3	proteasome (prosome, macropain) 26S subunit, non-ATPase, 3	0.501209	7.45742	0	0.999831	1	unchanged
ENSMUSG00000017264	Exosc10	exosome component 10	0.338551	4.47885	0	0.99992	1	unchanged
ENSMUSG00000017286	Glod4	glyoxalase domain containing 4	-0.804424	4.43765	0	0.853448	1	unchanged
ENSMUSG00000017288	Vps53	VPS53 GARP complex subunit	-0.10473	4.96433	0	1	1	unchanged
ENSMUSG00000017291	Taok1	TAO kinase 1	0.0223181	6.33734	0	1	1	unchanged
ENSMUSG00000017299	Dnttip1	deoxynucleotidyltransferase, terminal, interacting protein 1	-0.0337172	3.8645	0	0.999994	1	unchanged
ENSMUSG00000017307	Acot8	acyl-CoA thioesterase 8	-0.313634	4.76121	0	0.999928	1	unchanged
ENSMUSG00000017309	Cd300lg	CD300 molecule like family member G	-1.3948	3.94087	-1.78249	0.0454828	0.394641	unchanged
ENSMUSG00000017344	Vtn	vitronectin	0.111786	10.9738	0	1	1	unchanged
ENSMUSG00000017376	Nlk	nemo like kinase	-0.0432782	4.21077	0	0.999998	1	unchanged
ENSMUSG00000017386	Traf4	TNF receptor associated factor 4	-0.72797	3.30012	0	0.868399	1	unchanged
ENSMUSG00000017390	Aldoc	aldolase C, fructose-bisphosphate	-1.32499	4.18565	-1.56935	0.0666927	0.526944	unchanged
ENSMUSG00000017404	Rpl19	ribosomal protein L19	0.0762749	5.58403	0	0.999994	1	unchanged
ENSMUSG00000017405	Nek8	NIMA (never in mitosis gene a)-related expressed kinase 8	-0.620908	0.522424	0	0.731353	1	unchanged
ENSMUSG00000017417	Plxdc1	plexin domain containing 1	-0.541266	-0.31476	0	0.808438	1	unchanged
ENSMUSG00000017418	Arl5b	ADP-ribosylation factor-like 5B	-0.354696	3.65151	0	0.997257	1	unchanged
ENSMUSG00000017421	Zfp207	zinc finger protein 207	0.00858738	6.0526	0	1	1	unchanged
ENSMUSG00000017428	Psmd11	proteasome (prosome, macropain) 26S subunit, non-ATPase, 11	0.0888888	6.71018	0	1	1	unchanged
ENSMUSG00000017446	C1qtnf1	C1q and tumor necrosis factor related protein 1	1.18714	2.28183	0.527495	0.30204	1	unchanged
ENSMUSG00000017453	Pipox	pipecolic acid oxidase	-0.834952	7.50152	0	0.906914	1	unchanged
ENSMUSG00000017466	Timp2	tissue inhibitor of metalloproteinase 2	-0.146878	4.33409	0	0.99997	1	unchanged
ENSMUSG00000017478	Zc3h18	zinc finger CCCH-type containing 18	0.158481	5.58404	0	0.999984	1	unchanged
ENSMUSG00000017485	Top2b	topoisomerase (DNA) II beta	-0.199372	5.87305	0	0.999999	1	unchanged
ENSMUSG00000017491	Rarb	retinoic acid receptor, beta	0.535083	0.589878	0	0.853556	1	unchanged
ENSMUSG00000017493	Igfbp4	insulin-like growth factor binding protein 4	-0.393106	10.2354	0	0.999968	1	unchanged
ENSMUSG00000017499	Cdc6	cell division cycle 6	3.56618	1.05887	3.3854	0.00159012	0.0278492	upreg
ENSMUSG00000017548	Suz12	SUZ12 polycomb repressive complex 2 subunit	-0.053007	3.63646	0	0.999899	1	unchanged
ENSMUSG00000017550	Atad5	ATPase family, AAA domain containing 5	0.569017	1.3199	0	0.783036	1	unchanged
ENSMUSG00000017561	Crlf3	cytokine receptor-like factor 3	0.686681	3.81674	0	0.897624	1	unchanged
ENSMUSG00000017607	Tns4	tensin 4	2.48587	0.702705	2.59844	0.00891506	0.10883	unchanged
ENSMUSG00000017615	Tnfaip1	tumor necrosis factor, alpha-induced protein 1 (endothelial)	0.191849	6.00278	0	1	1	unchanged
ENSMUSG00000017631	Abr	active BCR-related gene	2.7483	3.24705	4.7441	7.40929e-05	0.00253704	upreg
ENSMUSG00000017639	Rab11fip4	RAB11 family interacting protein 4 (class II)	0.393547	1.96822	0	0.884364	1	unchanged
ENSMUSG00000017652	Cd40	CD40 antigen	3.95984	2.43067	4.65653	9.02341e-05	0.00293937	upreg
ENSMUSG00000017664	Slc35c2	solute carrier family 35, member C2	0.195088	4.23993	0	0.999946	1	unchanged
ENSMUSG00000017667	Zfp334	zinc finger protein 334	0.492898	1.06166	0	0.851534	1	unchanged
ENSMUSG00000017670	Elmo2	engulfment and cell motility 2	1.52207	3.34161	1.96352	0.0323402	0.302801	unchanged
ENSMUSG00000017677	Wsb1	WD repeat and SOCS box-containing 1	0.148564	3.49477	0	0.9997	1	unchanged
ENSMUSG00000017679	Ttpal	tocopherol (alpha) transfer protein-like	0.236933	3.21088	0	0.997667	1	unchanged
ENSMUSG00000017686	Rhot1	ras homolog family member T1	-0.333444	5.34679	0	0.999976	1	unchanged
ENSMUSG00000017697	Ada	adenosine deaminase	1.46073	1.86255	0.937197	0.180363	1	unchanged
ENSMUSG00000017707	Serinc3	serine incorporator 3	0.622036	8.79621	0	0.995892	1	unchanged
ENSMUSG00000017713	Tha1	threonine aldolase 1	0.587575	2.12492	0	0.786019	1	unchanged
ENSMUSG00000017715	Pgs1	phosphatidylglycerophosphate synthase 1	0.902355	4.04133	0	0.653185	1	unchanged
ENSMUSG00000017716	Birc5	baculoviral IAP repeat-containing 5	3.10959	3.81007	3.18252	0.00249824	0.0395719	upreg
ENSMUSG00000017718	Afmid	arylformamidase	-1.12882	3.38511	-0.505895	0.309431	1	unchanged
ENSMUSG00000017721	Pigt	phosphatidylinositol glycan anchor biosynthesis, class T	0.184555	3.58507	0	0.992555	1	unchanged
ENSMUSG00000017723	Wfdc2	WAP four-disulfide core domain 2	0.976238	2.3258	0	0.528077	1	unchanged
ENSMUSG00000017734	Dbndd2	dysbindin domain containing 2	-0.606313	1.10239	0	0.831029	1	unchanged
ENSMUSG00000017737	Mmp9	matrix metallopeptidase 9	2.16357	0.95332	1.08461	0.150142	0.967244	unchanged
ENSMUSG00000017740	Slc12a5	solute carrier family 12, member 5	0.144113	0.378808	0	0.981009	1	unchanged
ENSMUSG00000017747	Ghdc	GH3 domain containing	0.0800334	3.6696	0	0.999962	1	unchanged
ENSMUSG00000017754	Pltp	phospholipid transfer protein	-0.547661	4.99945	0	0.975791	1	unchanged
ENSMUSG00000017756	Slc12a7	solute carrier family 12, member 7	0.132565	5.70672	0	0.999999	1	unchanged
ENSMUSG00000017760	Ctsa	cathepsin A	0.376029	6.64676	0	0.999986	1	unchanged
ENSMUSG00000017764	Zswim1	zinc finger SWIM-type containing 1	0.391138	1.25425	0	0.893343	1	unchanged
ENSMUSG00000017765	Slc12a4	solute carrier family 12, member 4	0.537357	3.29491	0	0.970098	1	unchanged
ENSMUSG00000017774	Myo1c	myosin IC	0.421779	4.8034	0	0.999263	1	unchanged
ENSMUSG00000017776	Crk	v-crk avian sarcoma virus CT10 oncogene homolog	0.0990473	3.83092	0	0.999993	1	unchanged
ENSMUSG00000017778	Cox7c	cytochrome c oxidase subunit 7C	-0.662188	8.50605	0	0.99418	1	unchanged
ENSMUSG00000017781	Pitpna	phosphatidylinositol transfer protein, alpha	0.827022	6.04637	0	0.911554	1	unchanged
ENSMUSG00000017801	Mlx	MAX-like protein X	-0.0164029	5.00189	0	0.999999	1	unchanged
ENSMUSG00000017802	Retreg3	reticulophagy regulator family member 3	-0.571133	2.04516	0	0.910559	1	unchanged
ENSMUSG00000017830	Dhx58	DExH-box helicase 58	2.58812	3.27862	3.95563	0.000437476	0.0103573	upreg
ENSMUSG00000017831	Rab5a	RAB5A, member RAS oncogene family	0.359111	0.153316	0	0.906838	1	unchanged
ENSMUSG00000017837	Nkiras2	NFKB inhibitor interacting Ras-like protein 2	0.503924	3.91332	0	0.988205	1	unchanged
ENSMUSG00000017843	Ppp2r5c	protein phosphatase 2, regulatory subunit B', gamma	-0.339561	4.8465	0	0.999995	1	unchanged
ENSMUSG00000017858	Ift52	intraflagellar transport 52	-0.0221095	4.23213	0	0.999998	1	unchanged
ENSMUSG00000017868	Sgk2	serum/glucocorticoid regulated kinase 2	-0.731649	5.76595	0	0.900521	1	unchanged
ENSMUSG00000017929	B4galt5	UDP-Gal:betaGlcNAc beta 1,4-galactosyltransferase, polypeptide 5	0.604124	5.16975	0	0.902045	1	unchanged
ENSMUSG00000017950	Hnf4a	hepatic nuclear factor 4, alpha	-0.465289	8.63731	0	0.999726	1	unchanged
ENSMUSG00000017969	Ptgis	prostaglandin I2 (prostacyclin) synthase	1.46149	0.718221	0.646905	0.26416	1	unchanged
ENSMUSG00000017978	Cadps2	Ca2+-dependent activator protein for secretion 2	-0.762844	2.9138	0	0.857656	1	unchanged
ENSMUSG00000017999	Ddx27	DEAD box helicase 27	0.293471	4.42917	0	0.999829	1	unchanged
ENSMUSG00000018001	Cyth3	cytohesin 3	0.439128	2.32639	0	0.973925	1	unchanged
ENSMUSG00000018008	Cyth4	cytohesin 4	2.70239	4.20646	4.80946	6.4053e-05	0.00226489	upreg
ENSMUSG00000018040	Rrp7a	ribosomal RNA processing 7 homolog A	0.775073	1.35546	0	0.743345	1	unchanged
ENSMUSG00000018042	Cyb5r3	cytochrome b5 reductase 3	-1.2973	8.21907	-2.00839	0.0296574	0.282672	unchanged
ENSMUSG00000018068	Ints2	integrator complex subunit 2	0.41681	3.02625	0	0.997995	1	unchanged
ENSMUSG00000018076	Med13l	mediator complex subunit 13-like	-0.154591	4.2917	0	0.999976	1	unchanged
ENSMUSG00000018102	H2bc4	H2B clustered histone 4	-0.330377	8.00559	0	0.999938	1	unchanged
ENSMUSG00000018143	Mafk	v-maf musculoaponeurotic fibrosarcoma oncogene family, protein K (avian)	0.889867	3.27009	0	0.685626	1	unchanged
ENSMUSG00000018160	Med1	mediator complex subunit 1	0.328484	5.5281	0	0.999997	1	unchanged
ENSMUSG00000018166	Erbb3	erb-b2 receptor tyrosine kinase 3	-0.509885	4.66074	0	0.998041	1	unchanged
ENSMUSG00000018167	Stard3	StAR related lipid transfer domain containing 3	0.28637	4.13467	0	0.999911	1	unchanged
ENSMUSG00000018168	Ikzf3	IKAROS family zinc finger 3	3.23274	0.827764	2.72027	0.00689875	0.0891458	unchanged
ENSMUSG00000018169	Mfng	MFNG O-fucosylpeptide 3-beta-N-acetylglucosaminyltransferase	1.68595	0.672948	0.828237	0.211188	1	unchanged
ENSMUSG00000018171	Vmp1	vacuole membrane protein 1	-0.145972	7.60843	0	1	1	unchanged
ENSMUSG00000018189	Uchl5	ubiquitin carboxyl-terminal esterase L5	-0.533912	4.14671	0	0.986371	1	unchanged
ENSMUSG00000018196	Glrx2	glutaredoxin 2	-0.423289	4.90976	0	0.999772	1	unchanged
ENSMUSG00000018199	Ro60	Ro60, Y RNA binding protein	-0.0984336	2.88445	0	0.998905	1	unchanged
ENSMUSG00000018209	Stk4	serine/threonine kinase 4	0.55992	4.7443	0	0.995486	1	unchanged
ENSMUSG00000018217	Pmp22	peripheral myelin protein 22	-0.247704	2.02016	0	0.981451	1	unchanged
ENSMUSG00000018239	Zcchc10	zinc finger, CCHC domain containing 10	0.297077	3.15028	0	0.997067	1	unchanged
ENSMUSG00000018286	Psmb6	proteasome (prosome, macropain) subunit, beta type 6	0.256921	7.32351	0	1	1	unchanged
ENSMUSG00000018287	Spag7	sperm associated antigen 7	-0.673023	5.41731	0	0.97936	1	unchanged
ENSMUSG00000018293	Pfn1	profilin 1	1.22625	4.15136	0.764007	0.227213	1	unchanged
ENSMUSG00000018322	Tomm34	translocase of outer mitochondrial membrane 34	0.497457	3.50952	0	0.991168	1	unchanged
ENSMUSG00000018326	Ywhab	tyrosine 3-monooxygenase/tryptophan 5-monooxygenase activation protein, beta polypeptide	0.236521	7.7794	0	1	1	unchanged
ENSMUSG00000018334	Ksr1	kinase suppressor of ras 1	0.773787	1.96793	0	0.732605	1	unchanged
ENSMUSG00000018339	Gpx3	glutathione peroxidase 3	1.03836	3.32214	0.106085	0.458335	1	unchanged
ENSMUSG00000018340	Anxa6	annexin A6	0.0846617	7.06626	0	1	1	unchanged
ENSMUSG00000018341	Il12rb2	interleukin 12 receptor, beta 2	3.8347	-0.345065	3.59459	0.000993716	0.0197226	upreg
ENSMUSG00000018347	Zkscan6	zinc finger with KRAB and SCAN domains 6	0.625916	2.02928	0	0.916269	1	unchanged
ENSMUSG00000018363	Smurf2	SMAD specific E3 ubiquitin protein ligase 2	-0.172854	4.5267	0	0.999958	1	unchanged
ENSMUSG00000018372	Cep95	centrosomal protein 95	-0.308564	1.77606	0	0.991813	1	unchanged
ENSMUSG00000018377	Vezf1	vascular endothelial zinc finger 1	-0.00998663	3.88107	0	1	1	unchanged
ENSMUSG00000018378	2210416O15Rik	RIKEN cDNA 2210416O15 gene	-1.11536	0.437682	-0.262831	0.397845	1	unchanged
ENSMUSG00000018379	Srsf1	serine and arginine-rich splicing factor 1	0.289202	6.13764	0	0.999995	1	unchanged
ENSMUSG00000018381	Abi3	ABI family member 3	2.68071	4.99976	6.00569	4.80711e-06	0.000283256	upreg
ENSMUSG00000018387	Shroom1	shroom family member 1	-0.492169	4.31277	0	0.967902	1	unchanged
ENSMUSG00000018395	Kif3a	kinesin family member 3A	0.121967	2.82585	0	0.998861	1	unchanged
ENSMUSG00000018398	Septin8	septin 8	0.725413	3.3286	0	0.8789	1	unchanged
ENSMUSG00000018401	Mtmr4	myotubularin related protein 4	-0.135549	6.1248	0	0.999993	1	unchanged
ENSMUSG00000018405	Mrm1	mitochondrial rRNA methyltransferase 1	-0.547638	1.74287	0	0.886195	1	unchanged
ENSMUSG00000018411	Mapt	microtubule-associated protein tau	-1.3057	2.14015	-1.13783	0.134802	0.894497	unchanged
ENSMUSG00000018412	Kansl1	KAT8 regulatory NSL complex subunit 1	-0.0711171	4.20656	0	0.999998	1	unchanged
ENSMUSG00000018415	Gid4	GID complex subunit 4, VID24 homolog	-0.849984	4.03565	0	0.836455	1	unchanged
ENSMUSG00000018417	Myo1b	myosin IB	-0.638047	6.42548	0	0.990762	1	unchanged
ENSMUSG00000018425	Dhx40	DEAH-box helicase 40	-0.366247	4.99971	0	0.999975	1	unchanged
ENSMUSG00000018427	Ypel2	yippee like 2	-0.560866	3.50429	0	0.976126	1	unchanged
ENSMUSG00000018428	Akap1	A kinase anchor protein 1	-0.59358	5.418	0	0.98527	1	unchanged
ENSMUSG00000018433	Nol11	nucleolar protein 11	0.182246	4.31946	0	0.999871	1	unchanged
ENSMUSG00000018442	Derl2	Der1-like domain family, member 2	-0.399449	6.73575	0	0.999839	1	unchanged
ENSMUSG00000018446	C1qbp	complement component 1, q subcomponent binding protein	-0.638362	6.78067	0	0.994177	1	unchanged
ENSMUSG00000018449	Rpain	RPA interacting protein	0.12868	4.38086	0	0.999992	1	unchanged
ENSMUSG00000018459	Slc13a3	solute carrier family 13 (sodium-dependent dicarboxylate transporter), member 3	2.56435	5.50467	5.07515	3.5572e-05	0.00143785	upreg
ENSMUSG00000018474	Chd3	chromodomain helicase DNA binding protein 3	-0.19795	6.36688	0	0.999857	1	unchanged
ENSMUSG00000018476	Kdm6b	KDM1 lysine (K)-specific demethylase 6B	0.557483	3.01155	0	0.910411	1	unchanged
ENSMUSG00000018481	Appbp2	amyloid beta precursor protein binding protein 2	-0.180125	4.33293	0	0.999989	1	unchanged
ENSMUSG00000018486	Wnt9b	wingless-type MMTV integration site family, member 9B	0.291502	-0.132947	0	0.880722	1	unchanged
ENSMUSG00000018500	Adora2b	adenosine A2b receptor	3.24698	-0.873709	2.21192	0.0200988	0.207932	unchanged
ENSMUSG00000018501	Ncor1	nuclear receptor co-repressor 1	-0.0271449	7.68264	0	1	1	unchanged
ENSMUSG00000018507	Trpv2	transient receptor potential cation channel, subfamily V, member 2	3.9651	1.64266	3.42824	0.00144848	0.0261991	upreg
ENSMUSG00000018509	Cenpv	centromere protein V	-0.438734	4.44187	0	0.999591	1	unchanged
ENSMUSG00000018537	Pcgf2	polycomb group ring finger 2	-1.21008	1.86609	-0.688605	0.249777	1	unchanged
ENSMUSG00000018541	Cwc25	CWC25 spliceosome-associated protein	0.0975805	4.29634	0	0.999769	1	unchanged
ENSMUSG00000018547	Pip4k2b	phosphatidylinositol-5-phosphate 4-kinase, type II, beta	-0.0539046	4.38187	0	0.99996	1	unchanged
ENSMUSG00000018548	Trim37	tripartite motif-containing 37	0.140196	3.32385	0	0.999654	1	unchanged
ENSMUSG00000018559	Ctdnep1	CTD nuclear envelope phosphatase 1	0.364907	4.35669	0	0.999001	1	unchanged
ENSMUSG00000018565	Elp5	elongator acetyltransferase complex subunit 5	-0.143928	4.4938	0	0.999998	1	unchanged
ENSMUSG00000018567	Gabarap	gamma-aminobutyric acid receptor associated protein	0.146048	6.9561	0	0.999999	1	unchanged
ENSMUSG00000018572	Phf23	PHD finger protein 23	0.147988	5.32393	0	0.999992	1	unchanged
ENSMUSG00000018574	Acadvl	acyl-Coenzyme A dehydrogenase, very long chain	-0.681935	7.8123	0	0.996716	1	unchanged
ENSMUSG00000018583	G3bp1	G3BP stress granule assembly factor 1	0.437672	6.43997	0	0.99999	1	unchanged
ENSMUSG00000018585	Atox1	antioxidant 1 copper chaperone	0.051376	7.58895	0	1	1	unchanged
ENSMUSG00000018593	Sparc	secreted acidic cysteine rich glycoprotein	1.27606	7.63618	2.1369	0.0230455	0.230962	unchanged
ENSMUSG00000018599	Mief2	mitochondrial elongation factor 2	-0.785506	3.48317	0	0.862117	1	unchanged
ENSMUSG00000018604	Tbx3	T-box 3	0.305562	4.76175	0	0.942787	1	unchanged
ENSMUSG00000018623	Mmp7	matrix metallopeptidase 7	5.22851	0.494848	3.34119	0.00180066	0.0305674	upreg
ENSMUSG00000018648	Dusp14	dual specificity phosphatase 14	0.220034	0.952099	0	0.925133	1	unchanged
ENSMUSG00000018651	Tada2a	transcriptional adaptor 2A	-0.0887986	3.25803	0	0.999351	1	unchanged
ENSMUSG00000018654	Ikzf1	IKAROS family zinc finger 1	3.57323	3.67603	6.58905	1.44765e-06	0.000101494	upreg
ENSMUSG00000018659	Pnpo	pyridoxine 5'-phosphate oxidase	-0.0396154	7.10426	0	0.999999	1	unchanged
ENSMUSG00000018661	Cog1	component of oligomeric golgi complex 1	-0.0331533	2.67812	0	0.999905	1	unchanged
ENSMUSG00000018666	Cbx1	chromobox 1	-0.114388	6.31768	0	1	1	unchanged
ENSMUSG00000018669	Cdk5rap3	CDK5 regulatory subunit associated protein 3	-0.24641	5.05375	0	0.999982	1	unchanged
ENSMUSG00000018672	Copz2	coatomer protein complex, subunit zeta 2	-0.139088	3.3878	0	0.999856	1	unchanged
ENSMUSG00000018677	Slc25a39	solute carrier family 25, member 39	-0.564787	8.51119	0	0.999501	1	unchanged
ENSMUSG00000018678	Sp2	Sp2 transcription factor	0.336253	1.93114	0	0.972882	1	unchanged
ENSMUSG00000018697	Aatf	apoptosis antagonizing transcription factor	-0.497891	2.81016	0	0.97202	1	unchanged
ENSMUSG00000018707	Dync1h1	dynein cytoplasmic 1 heavy chain 1	0.482954	6.73106	0	0.998417	1	unchanged
ENSMUSG00000018727	Cpsf4l	cleavage and polyadenylation specific factor 4-like	-0.774406	1.2211	0	0.691481	1	unchanged
ENSMUSG00000018733	Pex12	peroxisomal biogenesis factor 12	-0.100921	3.06993	0	0.999299	1	unchanged
ENSMUSG00000018736	Ndel1	nudE neurodevelopment protein 1 like 1	0.171072	5.27273	0	0.999996	1	unchanged
ENSMUSG00000018740	Slc25a35	solute carrier family 25, member 35	1.41811	0.119739	0.75997	0.228551	1	unchanged
ENSMUSG00000018750	Zbtb4	zinc finger and BTB domain containing 4	0.466278	4.4531	0	0.997232	1	unchanged
ENSMUSG00000018752	Tnfsfm13	tumor necrosis factor (ligand) superfamily, membrane-bound member 13	-0.503351	-0.585452	0	0.79076	1	unchanged
ENSMUSG00000018761	Mpdu1	mannose-P-dolichol utilization defect 1	-0.404613	6.24498	0	0.99796	1	unchanged
ENSMUSG00000018765	Fxr2	FMR1 autosomal homolog 2	0.0363746	5.04948	0	1	1	unchanged
ENSMUSG00000018770	Atp5mc3	ATP synthase membrane subunit c locus 3	-0.996429	9.65633	0	0.514333	1	unchanged
ENSMUSG00000018774	Cd68	CD68 antigen	2.74124	5.30006	6.58663	1.4545e-06	0.000101494	upreg
ENSMUSG00000018796	Acsl1	acyl-CoA synthetase long-chain family member 1	-2.62937	7.98259	-10.1487	2.51151e-09	5.946e-07	downreg
ENSMUSG00000018800	Abca5	ATP-binding cassette, sub-family A member 5	-1.10169	0.806346	-0.231176	0.409917	1	unchanged
ENSMUSG00000018809	Smyd4	SET and MYND domain containing 4	0.079944	1.29862	0	0.984327	1	unchanged
ENSMUSG00000018819	Lsp1	lymphocyte specific 1	2.62627	2.62054	4.09032	0.000322504	0.00802206	upreg
ENSMUSG00000018820	Zfyve27	zinc finger, FYVE domain containing 27	0.0197311	2.94168	0	0.999977	1	unchanged
ENSMUSG00000018821	Avpi1	arginine vasopressin-induced 1	-0.401567	5.61483	0	0.999955	1	unchanged
ENSMUSG00000018830	Myh11	myosin, heavy polypeptide 11, smooth muscle	-0.493097	0.619012	0	0.84051	1	unchanged
ENSMUSG00000018841	Rad51d	RAD51 paralog D	-0.427286	2.70257	0	0.985134	1	unchanged
ENSMUSG00000018845	Unc45b	unc-45 myosin chaperone B	0.537024	2.46491	0	0.94319	1	unchanged
ENSMUSG00000018846	Pank3	pantothenate kinase 3	-0.56963	5.19274	0	0.996736	1	unchanged
ENSMUSG00000018848	Rars1	arginyl-tRNA synthetase 1	0.590624	5.37698	0	0.996176	1	unchanged
ENSMUSG00000018849	Wwc1	WW, C2 and coiled-coil domain containing 1	-0.03354	5.62869	0	0.999998	1	unchanged
ENSMUSG00000018858	Mrpl58	mitochondrial ribosomal protein L58	-0.26849	4.99982	0	0.999998	1	unchanged
ENSMUSG00000018861	Fdxr	ferredoxin reductase	-0.274391	3.97323	0	0.999972	1	unchanged
ENSMUSG00000018882	Mrpl45	mitochondrial ribosomal protein L45	-0.218983	5.12047	0	0.999999	1	unchanged
ENSMUSG00000018899	Irf1	interferon regulatory factor 1	3.3166	7.54493	7.5457	2.2316e-07	2.54151e-05	upreg
ENSMUSG00000018900	Slc22a5	solute carrier family 22 (organic cation transporter), member 5	0.0637692	1.97163	0	0.999435	1	unchanged
ENSMUSG00000018906	P4ha2	procollagen-proline, 2-oxoglutarate 4-dioxygenase (proline 4-hydroxylase), alpha II polypeptide	-0.263867	2.11992	0	0.99702	1	unchanged
ENSMUSG00000018909	Arrb1	arrestin, beta 1	0.946472	4.33168	0	0.599265	1	unchanged
ENSMUSG00000018920	Cxcl16	C-X-C motif chemokine ligand 16	2.25679	5.34461	4.62414	9.68689e-05	0.0031172	upreg
ENSMUSG00000018921	Pelp1	proline, glutamic acid and leucine rich protein 1	0.458485	3.63554	0	0.98397	1	unchanged
ENSMUSG00000018923	Med11	mediator complex subunit 11	0.227008	3.55941	0	0.999973	1	unchanged
ENSMUSG00000018927	Ccl6	C-C motif chemokine ligand 6	3.70169	6.16301	10.2764	2.05755e-09	5.14699e-07	upreg
ENSMUSG00000018930	Ccl4	C-C motif chemokine ligand 4	5.42647	0.993817	3.13041	0.00291699	0.0445546	upreg
ENSMUSG00000018931	Natd1	N-acetyltransferase domain containing 1	0.0437474	1.94362	0	0.995433	1	unchanged
ENSMUSG00000018932	Map2k3	mitogen-activated protein kinase kinase 3	0.0524906	5.75015	0	1	1	unchanged
ENSMUSG00000018965	Ywhah	tyrosine 3-monooxygenase/tryptophan 5-monooxygenase activation protein, eta polypeptide	0.803759	5.3659	0	0.883813	1	unchanged
ENSMUSG00000018974	Sart3	squamous cell carcinoma antigen recognized by T cells 3	0.225674	3.83298	0	0.999931	1	unchanged
ENSMUSG00000018983	E2f2	E2F transcription factor 2	1.10953	3.20313	0.170949	0.435006	1	unchanged
ENSMUSG00000018995	Nars2	asparaginyl-tRNA synthetase 2 (mitochondrial)(putative)	-0.923132	2.82592	0	0.618161	1	unchanged
ENSMUSG00000018999	Slc35b4	solute carrier family 35, member B4	-0.160286	4.36108	0	0.999996	1	unchanged
ENSMUSG00000019027	Dnah1	dynein, axonemal, heavy chain 1	3.51942	-1.4417	2.14812	0.0230886	0.2312	unchanged
ENSMUSG00000019039	Dalrd3	DALR anticodon binding domain containing 3	-0.285823	4.97596	0	0.999997	1	unchanged
ENSMUSG00000019054	Fis1	fission, mitochondrial 1	0.139077	5.61471	0	1	1	unchanged
ENSMUSG00000019055	Plod1	procollagen-lysine, 2-oxoglutarate 5-dioxygenase 1	0.520433	5.79681	0	0.999669	1	unchanged
ENSMUSG00000019066	Rab3d	RAB3D, member RAS oncogene family	-0.249289	3.30463	0	0.998191	1	unchanged
ENSMUSG00000019080	Mfsd3	major facilitator superfamily domain containing 3	-0.776107	3.01486	0	0.801849	1	unchanged
ENSMUSG00000019082	Slc25a22	solute carrier family 25 (mitochondrial carrier, glutamate), member 22	-0.129366	6.30869	0	0.999175	1	unchanged
ENSMUSG00000019087	Atp6ap1	ATPase, H+ transporting, lysosomal accessory protein 1	0.355977	6.64989	0	0.999866	1	unchanged
ENSMUSG00000019088	Dnase1l1	deoxyribonuclease 1-like 1	0.438488	2.13772	0	0.962037	1	unchanged
ENSMUSG00000019122	Ccl9	C-C motif chemokine ligand 9	0.464336	6.08464	0	0.993385	1	unchanged
ENSMUSG00000019132	BC005537	cDNA sequence BC005537	0.236898	6.38573	0	1	1	unchanged
ENSMUSG00000019139	Isyna1	myo-inositol 1-phosphate synthase A1	2.98307	6.10984	6.63429	1.32127e-06	9.71634e-05	upreg
ENSMUSG00000019143	Hars2	histidyl-tRNA synthetase 2	-0.699176	3.74099	0	0.984097	1	unchanged
ENSMUSG00000019158	Tmem160	transmembrane protein 160	-0.132179	6.1355	0	0.999991	1	unchanged
ENSMUSG00000019173	Rab5c	RAB5C, member RAS oncogene family	0.661725	6.9739	0	0.992902	1	unchanged
ENSMUSG00000019179	Mdh2	malate dehydrogenase 2, NAD (mitochondrial)	-0.436465	7.74292	0	0.999977	1	unchanged
ENSMUSG00000019188	H13	histocompatibility 13	-0.444764	6.84752	0	0.999985	1	unchanged
ENSMUSG00000019189	Rnf145	ring finger protein 145	0.274042	4.4405	0	0.999435	1	unchanged
ENSMUSG00000019194	Scn1b	sodium channel, voltage-gated, type I, beta	1.40945	3.66303	1.45316	0.0814041	0.612865	unchanged
ENSMUSG00000019210	Atp6v1e1	ATPase, H+ transporting, lysosomal V1 subunit E1	-0.0917877	7.02218	0	1	1	unchanged
ENSMUSG00000019214	Chtf18	CTF18, chromosome transmission fidelity factor 18	2.43881	-0.436414	2.13758	0.0230474	0.230962	unchanged
ENSMUSG00000019232	Etnppl	ethanolamine phosphate phospholyase	-3.01954	5.56065	-7.29842	3.5755e-07	3.59121e-05	downreg
ENSMUSG00000019254	Ppp1r12c	protein phosphatase 1, regulatory subunit 12C	0.775288	4.69796	0	0.875684	1	unchanged
ENSMUSG00000019256	Ahr	aryl-hydrocarbon receptor	0.487303	5.06826	0	0.996924	1	unchanged
ENSMUSG00000019261	Map1s	microtubule-associated protein 1S	1.32021	3.06311	1.15043	0.132257	0.884691	unchanged
ENSMUSG00000019278	Dpep1	dipeptidase 1	-0.106455	0.153181	0	0.963233	1	unchanged
ENSMUSG00000019295	Tmem129	transmembrane protein 129	-0.386941	3.33572	0	0.998831	1	unchanged
ENSMUSG00000019297	Nop9	NOP9 nucleolar protein	0.292145	4.4818	0	0.999809	1	unchanged
ENSMUSG00000019302	Atp6v0a1	ATPase, H+ transporting, lysosomal V0 subunit A1	-0.250999	4.98173	0	0.999975	1	unchanged
ENSMUSG00000019312	Grb7	growth factor receptor bound protein 7	-0.710706	6.15717	0	0.929005	1	unchanged
ENSMUSG00000019320	Noxo1	NADPH oxidase organizer 1	0.173449	0.156675	0	0.93817	1	unchanged
ENSMUSG00000019338	Zfp687	zinc finger protein 687	0.398243	2.88154	0	0.99141	1	unchanged
ENSMUSG00000019362	D8Ertd738e	DNA segment, Chr 8, ERATO Doi 738, expressed	-0.0894911	6.24546	0	1	1	unchanged
ENSMUSG00000019368	Sec14l4	SEC14-like lipid binding 4	0.0893751	7.46691	0	0.999999	1	unchanged
ENSMUSG00000019370	Calm3	calmodulin 3	0.65439	6.13238	0	0.99369	1	unchanged
ENSMUSG00000019373	Cops3	COP9 signalosome subunit 3	-0.20579	4.79468	0	0.999998	1	unchanged
ENSMUSG00000019428	Fkbp8	FK506 binding protein 8	-0.310159	6.96855	0	0.999993	1	unchanged
ENSMUSG00000019432	Ddx39b	DEAD box helicase 39b	0.471147	5.8191	0	0.999886	1	unchanged
ENSMUSG00000019433	Gipc1	GIPC PDZ domain containing family, member 1	0.933687	2.80206	0	0.583494	1	unchanged
ENSMUSG00000019437	Tlcd1	TLC domain containing 1	-1.2971	4.4472	-1.57099	0.0665023	0.526381	unchanged
ENSMUSG00000019461	Plscr3	phospholipid scramblase 3	0.876094	2.89856	0	0.685698	1	unchanged
ENSMUSG00000019467	Arhgef25	Rho guanine nucleotide exchange factor 25	1.12007	0.479088	0.259956	0.398978	1	unchanged
ENSMUSG00000019470	Xab2	XPA binding protein 2	0.663683	3.0489	0	0.942402	1	unchanged
ENSMUSG00000019471	Cdc37	cell division cycle 37	-0.020543	5.93248	0	1	1	unchanged
ENSMUSG00000019478	Rab4a	RAB4A, member RAS oncogene family	0.194527	4.2462	0	0.999891	1	unchanged
ENSMUSG00000019487	Trip10	thyroid hormone receptor interactor 10	-0.198191	0.941983	0	0.973022	1	unchanged
ENSMUSG00000019494	Cops6	COP9 signalosome subunit 6	-0.134351	5.50744	0	0.999994	1	unchanged
ENSMUSG00000019505	Ubb	ubiquitin B	0.606307	8.37517	0	0.982947	1	unchanged
ENSMUSG00000019518	Ap4m1	adaptor-related protein complex AP-4, mu 1	-0.138317	3.01441	0	0.999755	1	unchanged
ENSMUSG00000019528	Gyg1	glycogenin 1	0.97788	3.19193	0	0.53376	1	unchanged
ENSMUSG00000019539	Rcn3	reticulocalbin 3, EF-hand calcium binding domain	0.704259	2.82644	0	0.798052	1	unchanged
ENSMUSG00000019558	Slc6a8	solute carrier family 6 (neurotransmitter transporter, creatine), member 8	0.781142	1.92294	0	0.674561	1	unchanged
ENSMUSG00000019564	Arid3a	AT-rich interaction domain 3A	1.38639	2.79626	0.950472	0.177024	1	unchanged
ENSMUSG00000019578	Ubxn6	UBX domain protein 6	-0.578208	5.0432	0	0.999191	1	unchanged
ENSMUSG00000019579	Mydgf	myeloid derived growth factor	-0.12855	6.26328	0	1	1	unchanged
ENSMUSG00000019590	Cyb561	cytochrome b-561	1.64238	3.7629	2.59238	0.00902638	0.109791	unchanged
ENSMUSG00000019647	Sema6a	sema domain, transmembrane domain (TM), and cytoplasmic domain, (semaphorin) 6A	-0.697763	3.35374	0	0.921666	1	unchanged
ENSMUSG00000019659	Ccdc12	coiled-coil domain containing 12	0.388172	4.87473	0	0.999933	1	unchanged
ENSMUSG00000019689	Fmc1	formation of mitochondrial complex V assembly factor 1	-1.2123	6.30794	-1.67883	0.0549349	0.454353	unchanged
ENSMUSG00000019699	Akt3	thymoma viral proto-oncogene 3	1.97612	2.64247	3.9071	0.000488267	0.0112778	upreg
ENSMUSG00000019710	Mrpl24	mitochondrial ribosomal protein L24	-0.234273	6.25477	0	1	1	unchanged
ENSMUSG00000019715	Gle1	GLE1 RNA export mediator	-0.515151	4.54739	0	0.996665	1	unchanged
ENSMUSG00000019718	L3hypdh	L-3-hydroxyproline dehydratase (trans-)	-0.551472	3.77603	0	0.973754	1	unchanged
ENSMUSG00000019726	Lyst	lysosomal trafficking regulator	0.121091	2.09528	0	0.986765	1	unchanged
ENSMUSG00000019731	Slc35e1	solute carrier family 35, member E1	-0.0692707	4.61978	0	0.999994	1	unchanged
ENSMUSG00000019734	Tmc4	transmembrane channel-like gene family 4	-0.986756	0.529066	0	0.51097	1	unchanged
ENSMUSG00000019737	Syne4	spectrin repeat containing, nuclear envelope family member 4	1.91561	2.27706	1.34625	0.09739	0.70365	unchanged
ENSMUSG00000019738	Polr2i	polymerase (RNA) II (DNA directed) polypeptide I	-0.108794	6.11185	0	0.999999	1	unchanged
ENSMUSG00000019761	Krt10	keratin 10	-0.190357	1.38012	0	0.979707	1	unchanged
ENSMUSG00000019762	Iyd	iodotyrosine deiodinase	-0.671519	6.81565	0	0.994611	1	unchanged
ENSMUSG00000019763	Rmnd1	required for meiotic nuclear division 1 homolog	-0.623338	3.33932	0	0.959118	1	unchanged
ENSMUSG00000019768	Esr1	estrogen receptor 1 (alpha)	0.471038	4.74642	0	0.968855	1	unchanged
ENSMUSG00000019773	Fbxo5	F-box protein 5	1.90016	0.993331	1.26396	0.111248	0.776686	unchanged
ENSMUSG00000019774	Mtrf1l	mitochondrial translational release factor 1-like	0.0427487	2.7026	0	0.999659	1	unchanged
ENSMUSG00000019777	Hdac2	histone deacetylase 2	-0.0200827	3.92032	0	0.999991	1	unchanged
ENSMUSG00000019779	Frk	fyn-related kinase	0.347517	2.30648	0	0.9901	1	unchanged
ENSMUSG00000019782	Rwdd1	RWD domain containing 1	0.0834811	2.90487	0	0.999783	1	unchanged
ENSMUSG00000019790	Stxbp5	syntaxin binding protein 5 (tomosyn)	0.411808	3.34007	0	0.994685	1	unchanged
ENSMUSG00000019791	Hint3	histidine triad nucleotide binding protein 3	-0.397461	4.88549	0	0.999763	1	unchanged
ENSMUSG00000019792	Trmt11	tRNA methyltransferase 11	0.421025	1.77362	0	0.923207	1	unchanged
ENSMUSG00000019794	Katna1	katanin p60 (ATPase-containing) subunit A1	0.556665	4.57398	0	0.99608	1	unchanged
ENSMUSG00000019795	Pcmt1	protein-L-isoaspartate (D-aspartate) O-methyltransferase 1	-0.35518	5.14586	0	0.999983	1	unchanged
ENSMUSG00000019796	Lrp11	low density lipoprotein receptor-related protein 11	0.805663	0.0404768	0	0.615421	1	unchanged
ENSMUSG00000019797	Mtres1	mitochondrial transcription rescue factor 1	-0.673858	3.99607	0	0.982843	1	unchanged
ENSMUSG00000019802	Sec63	SEC63 homolog, protein translocation regulator	-0.149512	7.19627	0	1	1	unchanged
ENSMUSG00000019804	Snx3	sorting nexin 3	0.197436	7.08419	0	0.999996	1	unchanged
ENSMUSG00000019806	Aig1	androgen-induced 1	1.01178	5.34709	0.0733495	0.471155	1	unchanged
ENSMUSG00000019808	Adat2	adenosine deaminase, tRNA-specific 2	0.454162	1.0589	0	0.914184	1	unchanged
ENSMUSG00000019809	Pex3	peroxisomal biogenesis factor 3	-0.543728	4.1926	0	0.992393	1	unchanged
ENSMUSG00000019810	Fuca2	fucosidase, alpha-L- 2, plasma	1.15013	3.2238	0.493552	0.313694	1	unchanged
ENSMUSG00000019813	Cep57l1	centrosomal protein 57-like 1	0.224047	1.80161	0	0.989283	1	unchanged
ENSMUSG00000019814	Ltv1	LTV1 ribosome biogenesis factor	-0.135177	3.86325	0	0.99946	1	unchanged
ENSMUSG00000019817	Plagl1	pleiomorphic adenoma gene-like 1	-0.443645	1.12507	0	0.870788	1	unchanged
ENSMUSG00000019818	Cd164	CD164 antigen	-0.178497	7.9059	0	1	1	unchanged
ENSMUSG00000019820	Utrn	utrophin	-0.360403	5.05339	0	0.999253	1	unchanged
ENSMUSG00000019822	Smpd2	sphingomyelin phosphodiesterase 2, neutral	-0.329689	4.54067	0	0.999711	1	unchanged
ENSMUSG00000019823	Mical1	microtubule associated monooxygenase, calponin and LIM domain containing 1	1.68484	1.45547	1.59817	0.0634117	0.507645	unchanged
ENSMUSG00000019826	Zbtb24	zinc finger and BTB domain containing 24	-0.517055	1.92748	0	0.923586	1	unchanged
ENSMUSG00000019831	Wasf1	WASP family, member 1	-1.50602	-0.0264756	-1.13303	0.135794	0.898831	unchanged
ENSMUSG00000019832	Rab32	RAB32, member RAS oncogene family	0.606087	6.11939	0	0.997341	1	unchanged
ENSMUSG00000019837	Gtf3c6	general transcription factor IIIC, polypeptide 6, alpha	0.0473363	4.655	0	1	1	unchanged
ENSMUSG00000019838	Slc16a10	solute carrier family 16 (monocarboxylic acid transporters), member 10	0.37001	5.76783	0	0.998533	1	unchanged
ENSMUSG00000019841	Rev3l	REV3 like, DNA directed polymerase zeta catalytic subunit	-0.221726	3.0963	0	0.998872	1	unchanged
ENSMUSG00000019842	Traf3ip2	TRAF3 interacting protein 2	0.571943	1.60853	0	0.85342	1	unchanged
ENSMUSG00000019843	Fyn	Fyn proto-oncogene	1.18178	3.76741	0.726227	0.23836	1	unchanged
ENSMUSG00000019845	Tube1	tubulin, epsilon 1	-0.451668	-0.695502	0	0.806228	1	unchanged
ENSMUSG00000019846	Lama4	laminin, alpha 4	-1.35569	1.27248	-0.786196	0.220843	1	unchanged
ENSMUSG00000019849	Prep	prolyl endopeptidase	-0.518324	4.4177	0	0.998155	1	unchanged
ENSMUSG00000019850	Tnfaip3	tumor necrosis factor, alpha-induced protein 3	3.40653	1.70456	3.04384	0.00340468	0.0502664	unchanged
ENSMUSG00000019851	Perp	PERP, TP53 apoptosis effector	-1.01373	5.65656	-0.0955262	0.462458	1	unchanged
ENSMUSG00000019853	Hebp2	heme binding protein 2	1.3055	1.05743	0.455102	0.328566	1	unchanged
ENSMUSG00000019854	Reps1	RalBP1 associated Eps domain containing protein	-0.0743071	3.34654	0	0.999977	1	unchanged
ENSMUSG00000019857	Asf1a	anti-silencing function 1A histone chaperone	0.311445	2.79039	0	0.99474	1	unchanged
ENSMUSG00000019861	Gopc	golgi associated PDZ and coiled-coil motif containing	0.102678	4.35462	0	0.99999	1	unchanged
ENSMUSG00000019863	Qrsl1	glutaminyl-tRNA synthase (glutamine-hydrolyzing)-like 1	-0.0884861	3.23565	0	0.999899	1	unchanged
ENSMUSG00000019864	Rtn4ip1	reticulon 4 interacting protein 1	-0.505852	3.72185	0	0.995102	1	unchanged
ENSMUSG00000019866	Crybg1	crystallin beta-gamma domain containing 1	1.91596	4.90239	4.96036	4.58272e-05	0.00177136	upreg
ENSMUSG00000019868	Vta1	vesicle (multivesicular body) trafficking 1	0.0287079	3.84783	0	0.999998	1	unchanged
ENSMUSG00000019872	Smpdl3a	sphingomyelin phosphodiesterase, acid-like 3A	0.00843566	5.69837	0	1	1	unchanged
ENSMUSG00000019873	Reep3	receptor accessory protein 3	-0.881585	6.59744	0	0.856373	1	unchanged
ENSMUSG00000019874	Fabp7	fatty acid binding protein 7, brain	1.91963	1.79117	1.65955	0.0568911	0.464161	unchanged
ENSMUSG00000019876	Pkib	protein kinase inhibitor beta, cAMP dependent, testis specific	3.43985	1.50091	3.77	0.000666803	0.0144452	upreg
ENSMUSG00000019877	Serinc1	serine incorporator 1	-0.162853	6.19073	0	1	1	unchanged
ENSMUSG00000019878	Hsf2	heat shock factor 2	-0.245535	4.6085	0	0.999803	1	unchanged
ENSMUSG00000019880	Rspo3	R-spondin 3	0.220419	3.66463	0	0.999694	1	unchanged
ENSMUSG00000019883	Echdc1	enoyl Coenzyme A hydratase domain containing 1	-1.48919	4.80049	-3.06666	0.00322589	0.0482174	downreg
ENSMUSG00000019889	Ptprk	protein tyrosine phosphatase receptor type K	-0.309108	5.41288	0	0.999821	1	unchanged
ENSMUSG00000019891	Dcbld1	discoidin, CUB and LCCL domain containing 1	-0.16617	2.61797	0	0.999257	1	unchanged
ENSMUSG00000019897	Ccdc59	coiled-coil domain containing 59	0.478708	4.57072	0	0.999398	1	unchanged
ENSMUSG00000019899	Lama2	laminin, alpha 2	-0.727234	-0.335635	0	0.667438	1	unchanged
ENSMUSG00000019906	Lin7a	lin-7 homolog A, crumbs cell polarity complex component	-0.705579	4.13075	0	0.89932	1	unchanged
ENSMUSG00000019907	Ppp1r12a	protein phosphatase 1, regulatory subunit 12A	0.364349	5.5449	0	0.999987	1	unchanged
ENSMUSG00000019916	P4ha1	procollagen-proline, 2-oxoglutarate 4-dioxygenase (proline 4-hydroxylase), alpha 1 polypeptide	0.832275	3.71972	0	0.750836	1	unchanged
ENSMUSG00000019917	Septin10	septin 10	-0.291265	3.54893	0	0.998798	1	unchanged
ENSMUSG00000019920	Lims1	LIM and senescent cell antigen-like domains 1	0.688308	3.76504	0	0.928297	1	unchanged
ENSMUSG00000019923	Zwint	ZW10 interactor	0.278245	5.72942	0	0.999938	1	unchanged
ENSMUSG00000019927	Ube2d1	ubiquitin-conjugating enzyme E2D 1	0.271116	2.46584	0	0.995519	1	unchanged
ENSMUSG00000019929	Dcn	decorin	0.096787	8.16378	0	1	1	unchanged
ENSMUSG00000019935	Slc17a8	solute carrier family 17 (sodium-dependent inorganic phosphate cotransporter), member 8	-2.50279	2.39874	-3.91283	0.000481996	0.0111718	downreg
ENSMUSG00000019942	Cdk1	cyclin dependent kinase 1	2.21621	3.76916	2.24308	0.018633	0.195132	unchanged
ENSMUSG00000019943	Atp2b1	ATPase, Ca++ transporting, plasma membrane 1	0.412756	6.40137	0	0.99999	1	unchanged
ENSMUSG00000019944	Rhobtb1	Rho-related BTB domain containing 1	-0.555956	5.36172	0	0.996053	1	unchanged
ENSMUSG00000019945	Cabcoco1	ciliary associated calcium binding coiled-coil 1	-1.32841	-0.892606	-0.386902	0.358145	1	unchanged
ENSMUSG00000019947	Arid5b	AT-rich interaction domain 5B	-0.516173	5.90426	0	0.98892	1	unchanged
ENSMUSG00000019948	Actr6	ARP6 actin-related protein 6	-0.322643	2.99241	0	0.991748	1	unchanged
ENSMUSG00000019951	Bltp3b	bridge-like lipid transfer protein family member 3B	-0.197055	6.19279	0	0.999999	1	unchanged
ENSMUSG00000019952	Poc1b	POC1 centriolar protein B	-0.523814	2.75271	0	0.949661	1	unchanged
ENSMUSG00000019960	Dusp6	dual specificity phosphatase 6	0.900905	6.11358	0	0.633794	1	unchanged
ENSMUSG00000019961	Tmpo	thymopoietin	0.693531	5.7188	0	0.991258	1	unchanged
ENSMUSG00000019966	Kitl	kit ligand	1.28451	1.72035	0.759102	0.228646	1	unchanged
ENSMUSG00000019969	Psen1	presenilin 1	0.909256	4.88998	0	0.728169	1	unchanged
ENSMUSG00000019970	Sgk1	serum/glucocorticoid regulated kinase 1	-0.119912	4.30093	0	0.998308	1	unchanged
ENSMUSG00000019971	Cep290	centrosomal protein 290	0.762877	2.80079	0	0.782028	1	unchanged
ENSMUSG00000019975	Ikbip	IKBKB interacting protein	-0.0283288	2.39844	0	0.999729	1	unchanged
ENSMUSG00000019977	Hbs1l	Hbs1-like (S. cerevisiae)	-0.610801	5.21445	0	0.996421	1	unchanged
ENSMUSG00000019978	Epb41l2	erythrocyte membrane protein band 4.1 like 2	0.455179	4.91289	0	0.988483	1	unchanged
ENSMUSG00000019979	Apaf1	apoptotic peptidase activating factor 1	1.72101	2.18169	1.94075	0.033783	0.313433	unchanged
ENSMUSG00000019984	Med23	mediator complex subunit 23	-0.0526936	3.09148	0	0.999815	1	unchanged
ENSMUSG00000019986	Ahi1	Abelson helper integration site 1	-0.00961133	1.1046	0	0.999686	1	unchanged
ENSMUSG00000019987	Arg1	arginase, liver	0.103652	10.0841	0	0.999945	1	unchanged
ENSMUSG00000019988	Nedd1	neural precursor cell expressed, developmentally down-regulated gene 1	0.215029	2.70941	0	0.995508	1	unchanged
ENSMUSG00000019989	Enpp3	ectonucleotide pyrophosphatase/phosphodiesterase 3	-0.129361	4.35686	0	0.999781	1	unchanged
ENSMUSG00000019990	Pde7b	phosphodiesterase 7B	0.245888	0.0937009	0	0.921161	1	unchanged
ENSMUSG00000019992	Mtfr2	mitochondrial fission regulator 2	3.1243	-0.927485	2.262	0.0180905	0.190806	unchanged
ENSMUSG00000019996	Map7	microtubule-associated protein 7	-0.630494	4.3007	0	0.991354	1	unchanged
ENSMUSG00000019997	Ccn2	cellular communication network factor 2	-0.323644	2.29371	0	0.867523	1	unchanged
ENSMUSG00000019998	Stx7	syntaxin 7	0.860737	5.05331	0	0.8233	1	unchanged
ENSMUSG00000020003	Pex7	peroxisomal biogenesis factor 7	-0.634644	4.69435	0	0.959989	1	unchanged
ENSMUSG00000020009	Ifngr1	interferon gamma receptor 1	0.491299	5.20779	0	0.983784	1	unchanged
ENSMUSG00000020010	Vnn3	vanin 3	-0.0508192	5.92919	0	0.999973	1	unchanged
ENSMUSG00000020015	Cdk17	cyclin dependent kinase 17	-0.174301	3.99472	0	0.999541	1	unchanged
ENSMUSG00000020017	Hal	histidine ammonia lyase	-0.994419	7.82251	0	0.511728	1	unchanged
ENSMUSG00000020018	Snrpf	small nuclear ribonucleoprotein polypeptide F	1.19216	2.77458	0.386717	0.351829	1	unchanged
ENSMUSG00000020019	Ntn4	netrin 4	-1.51557	1.97841	-1.13346	0.135707	0.898704	unchanged
ENSMUSG00000020021	Fgd6	FYVE, RhoGEF and PH domain containing 6	-0.56209	3.1688	0	0.96859	1	unchanged
ENSMUSG00000020022	Ndufa12	NADH:ubiquinone oxidoreductase subunit A12	-0.424952	6.64413	0	0.999916	1	unchanged
ENSMUSG00000020023	Tmcc3	transmembrane and coiled coil domains 3	-0.111678	4.58244	0	0.999999	1	unchanged
ENSMUSG00000020024	Cep83	centrosomal protein 83	0.0142675	2.29524	0	0.999629	1	unchanged
ENSMUSG00000020027	Socs2	suppressor of cytokine signaling 2	-0.979337	5.01113	0	0.517666	1	unchanged
ENSMUSG00000020029	Nudt4	nudix hydrolase 4	-0.193642	7.2749	0	1	1	unchanged
ENSMUSG00000020032	Nuak1	NUAK family, SNF1-like kinase, 1	-0.0292331	3.01718	0	0.998724	1	unchanged
ENSMUSG00000020034	Tcp11l2	t-complex 11 (mouse) like 2	-1.126	2.52206	-0.301833	0.383095	1	unchanged
ENSMUSG00000020038	Cry1	cryptochrome circadian regulator 1	-1.02138	3.74279	-0.0863898	0.466039	1	unchanged
ENSMUSG00000020042	Abtb3	ankyrin repeat and BTB domain containing 3	0.645914	1.37249	0	0.763127	1	unchanged
ENSMUSG00000020044	Timp3	tissue inhibitor of metalloproteinase 3	1.38666	5.8365	1.58537	0.0648505	0.51577	unchanged
ENSMUSG00000020048	Hsp90b1	heat shock protein 90, beta (Grp94), member 1	0.957484	9.55694	0	0.591088	1	unchanged
ENSMUSG00000020051	Pah	phenylalanine hydroxylase	-1.15936	8.2988	-1.14966	0.132411	0.885279	unchanged
ENSMUSG00000020053	Igf1	insulin-like growth factor 1	-1.09067	9.66064	-0.740487	0.234115	1	unchanged
ENSMUSG00000020056	Washc3	WASH complex subunit 3	0.223325	4.5686	0	0.999795	1	unchanged
ENSMUSG00000020057	Dram1	DNA-damage regulated autophagy modulator 1	5.37458	2.58091	5.36201	1.913e-05	0.000880644	upreg
ENSMUSG00000020063	Sirt1	sirtuin 1	0.17112	2.83319	0	0.99966	1	unchanged
ENSMUSG00000020064	Herc4	hect domain and RLD 4	-0.169348	5.4172	0	0.999991	1	unchanged
ENSMUSG00000020069	Hnrnph3	heterogeneous nuclear ribonucleoprotein H3	-0.114148	4.28547	0	0.99999	1	unchanged
ENSMUSG00000020070	Rufy2	RUN and FYVE domain-containing 2	0.65737	1.9051	0	0.874632	1	unchanged
ENSMUSG00000020072	Pbld2	phenazine biosynthesis-like protein domain containing 2	-0.821528	6.69322	0	0.902474	1	unchanged
ENSMUSG00000020074	Ccar1	cell division cycle and apoptosis regulator 1	0.179195	6.30896	0	0.999996	1	unchanged
ENSMUSG00000020075	Ddx21	DExD box helicase 21	0.576772	5.53899	0	0.999347	1	unchanged
ENSMUSG00000020076	Ddx50	DExD box helicase 50	-0.398156	5.11377	0	0.999874	1	unchanged
ENSMUSG00000020077	Srgn	serglycin	2.89508	5.52297	9.90418	3.69809e-09	8.31005e-07	upreg
ENSMUSG00000020078	Vps26a	VPS26 retromer complex component A	0.191207	4.93488	0	0.999987	1	unchanged
ENSMUSG00000020079	Supv3l1	suppressor of var1, 3-like 1 (S. cerevisiae)	-0.217421	3.30962	0	0.999921	1	unchanged
ENSMUSG00000020083	Fam241b	family with sequence similarity 241, member B	0.0893386	0.219286	0	0.986684	1	unchanged
ENSMUSG00000020085	Aifm2	apoptosis-inducing factor, mitochondrion-associated 2	0.628738	4.65291	0	0.976463	1	unchanged
ENSMUSG00000020087	Tysnd1	trypsin domain containing 1	-0.566824	5.48291	0	0.993514	1	unchanged
ENSMUSG00000020088	Sar1a	secretion associated Ras related GTPase 1A	0.326666	6.3016	0	0.999997	1	unchanged
ENSMUSG00000020089	Ppa1	pyrophosphatase (inorganic) 1	0.582611	8.24306	0	0.998501	1	unchanged
ENSMUSG00000020091	Eif4ebp2	eukaryotic translation initiation factor 4E binding protein 2	-1.38237	3.39647	-1.19178	0.12415	0.845396	unchanged
ENSMUSG00000020092	Pald1	phosphatase domain containing, paladin 1	0.0297897	2.30167	0	0.999284	1	unchanged
ENSMUSG00000020097	Sgpl1	sphingosine phosphate lyase 1	-0.103062	5.9611	0	1	1	unchanged
ENSMUSG00000020098	Pcbd1	pterin 4 alpha carbinolamine dehydratase/dimerization cofactor of hepatocyte nuclear factor 1 alpha (TCF1) 1	-0.866552	7.96961	0	0.854845	1	unchanged
ENSMUSG00000020099	Unc5b	unc-5 netrin receptor B	-0.69563	2.16602	0	0.86485	1	unchanged
ENSMUSG00000020100	Slc29a3	solute carrier family 29 (nucleoside transporters), member 3	1.05036	3.59401	0.173276	0.432152	1	unchanged
ENSMUSG00000020101	Vsir	V-set immunoregulatory receptor	1.09535	4.38053	0.361854	0.360765	1	unchanged
ENSMUSG00000020102	Slc16a7	solute carrier family 16 (monocarboxylic acid transporters), member 7	-0.478795	4.02029	0	0.98541	1	unchanged
ENSMUSG00000020105	Lrig3	leucine-rich repeats and immunoglobulin-like domains 3	-0.0502115	3.39116	0	0.999484	1	unchanged
ENSMUSG00000020107	Anapc16	anaphase promoting complex subunit 16	-0.331292	4.81577	0	0.999989	1	unchanged
ENSMUSG00000020108	Ddit4	DNA-damage-inducible transcript 4	0.986665	5.01005	0	0.514819	1	unchanged
ENSMUSG00000020109	Dnajb12	DnaJ heat shock protein family (Hsp40) member B12	-0.334093	4.64123	0	0.999799	1	unchanged
ENSMUSG00000020111	Micu1	mitochondrial calcium uptake 1	-0.254967	4.02536	0	0.999865	1	unchanged
ENSMUSG00000020114	Cand1	cullin associated and neddylation disassociated 1	0.00350961	5.20209	0	1	1	unchanged
ENSMUSG00000020115	Tbk1	TANK-binding kinase 1	0.702813	4.01223	0	0.945794	1	unchanged
ENSMUSG00000020116	Pno1	partner of NOB1 homolog	-0.16263	4.75508	0	0.999968	1	unchanged
ENSMUSG00000020120	Plek	pleckstrin	3.8834	4.26438	7.69101	1.69846e-07	2.03214e-05	upreg
ENSMUSG00000020121	Srgap1	SLIT-ROBO Rho GTPase activating protein 1	0.102099	1.63108	0	0.989613	1	unchanged
ENSMUSG00000020122	Egfr	epidermal growth factor receptor	0.0696252	8.04105	0	0.999973	1	unchanged
ENSMUSG00000020123	Avpr1a	arginine vasopressin receptor 1A	-0.597153	5.08396	0	0.958643	1	unchanged
ENSMUSG00000020124	Usp15	ubiquitin specific peptidase 15	0.100442	3.94919	0	0.999818	1	unchanged
ENSMUSG00000020125	Elane	elastase, neutrophil expressed	2.46578	-0.495693	0.62878	0.345465	1	unchanged
ENSMUSG00000020128	Vps54	VPS54 GARP complex subunit	-0.0796728	3.74243	0	0.999962	1	unchanged
ENSMUSG00000020130	Tbc1d15	TBC1 domain family, member 15	-0.346108	4.96379	0	0.999732	1	unchanged
ENSMUSG00000020131	Pcsk4	proprotein convertase subtilisin/kexin type 4	-0.582397	2.46442	0	0.954989	1	unchanged
ENSMUSG00000020132	Rab21	RAB21, member RAS oncogene family	0.305405	4.55194	0	0.999963	1	unchanged
ENSMUSG00000020133	2310011J03Rik	RIKEN cDNA 2310011J03 gene	0.347979	3.83046	0	0.999916	1	unchanged
ENSMUSG00000020134	Peli1	pellino 1	0.243303	5.46379	0	0.999997	1	unchanged
ENSMUSG00000020137	Thap2	THAP domain containing, apoptosis associated protein 2	0.489111	2.03331	0	0.898531	1	unchanged
ENSMUSG00000020140	Lgr5	leucine rich repeat containing G protein coupled receptor 5	-0.524103	2.444	0	0.933747	1	unchanged
ENSMUSG00000020142	Slc1a4	solute carrier family 1 (glutamate/neutral amino acid transporter), member 4	1.02652	4.13312	0.064303	0.474758	1	unchanged
ENSMUSG00000020143	Dock2	dedicator of cyto-kinesis 2	2.76263	4.01618	4.56136	0.000111507	0.00350322	upreg
ENSMUSG00000020149	Rab1a	RAB1A, member RAS oncogene family	0.0575752	6.80914	0	1	1	unchanged
ENSMUSG00000020150	Gamt	guanidinoacetate methyltransferase	-1.47476	7.16774	-3.14558	0.0027085	0.0420484	downreg
ENSMUSG00000020152	Actr2	actin related protein 2	0.44781	6.13233	0	0.999785	1	unchanged
ENSMUSG00000020153	Ndufs7	NADH:ubiquinone oxidoreductase core subunit S7	-0.664993	6.48615	0	0.996649	1	unchanged
ENSMUSG00000020154	Ptprb	protein tyrosine phosphatase receptor type B	-1.54996	5.57787	-4.09292	0.000320595	0.00798957	downreg
ENSMUSG00000020156	Pwwp3a	PWWP domain containing 3A, DNA repair factor	-0.413894	2.58361	0	0.986125	1	unchanged
ENSMUSG00000020160	Meis1	Meis homeobox 1	-0.119145	2.44824	0	0.995525	1	unchanged
ENSMUSG00000020163	Uqcr11	ubiquinol-cytochrome c reductase, complex III subunit XI	-0.9273	7.56393	0	0.69599	1	unchanged
ENSMUSG00000020166	Cnot2	CCR4-NOT transcription complex, subunit 2	0.0412951	4.37096	0	0.999989	1	unchanged
ENSMUSG00000020167	Tcf3	transcription factor 3	0.144976	3.40876	0	0.999677	1	unchanged
ENSMUSG00000020170	Frs2	fibroblast growth factor receptor substrate 2	-0.37386	2.09033	0	0.970543	1	unchanged
ENSMUSG00000020171	Yeats4	YEATS domain containing 4	0.152255	5.46027	0	0.999999	1	unchanged
ENSMUSG00000020173	Cobl	cordon-bleu WH2 repeat	0.409139	4.09319	0	0.997193	1	unchanged
ENSMUSG00000020175	Rab36	RAB36, member RAS oncogene family	0.705732	-0.38529	0	0.668277	1	unchanged
ENSMUSG00000020176	Grb10	growth factor receptor bound protein 10	0.341003	1.46047	0	0.967597	1	unchanged
ENSMUSG00000020178	Adora2a	adenosine A2a receptor	0.767353	0.560137	0	0.667683	1	unchanged
ENSMUSG00000020180	Snrpd3	small nuclear ribonucleoprotein D3	0.18844	5.40163	0	0.999966	1	unchanged
ENSMUSG00000020182	Ddc	dopa decarboxylase	-1.41246	6.13469	-2.19554	0.0204996	0.210196	unchanged
ENSMUSG00000020183	Cpm	carboxypeptidase M	-0.388596	1.54114	0	0.951559	1	unchanged
ENSMUSG00000020184	Mdm2	transformed mouse 3T3 cell double minute 2	0.717597	5.66513	0	0.965665	1	unchanged
ENSMUSG00000020185	E2f7	E2F transcription factor 7	1.1774	1.25389	0.407403	0.344218	1	unchanged
ENSMUSG00000020186	Csrp2	cysteine and glycine-rich protein 2	0.375732	5.79338	0	0.999826	1	unchanged
ENSMUSG00000020189	Osbpl8	oxysterol binding protein-like 8	-0.430085	4.35485	0	0.998966	1	unchanged
ENSMUSG00000020190	Mknk2	MAP kinase-interacting serine/threonine kinase 2	-0.470451	5.63861	0	0.987481	1	unchanged
ENSMUSG00000020196	Cabin1	calcineurin binding protein 1	0.571525	4.0752	0	0.980733	1	unchanged
ENSMUSG00000020198	Ap3d1	adaptor-related protein complex 3, delta 1 subunit	0.32695	6.1852	0	0.999999	1	unchanged
ENSMUSG00000020205	Phlda1	pleckstrin homology like domain, family A, member 1	-2.06158	6.76797	-3.44483	0.00138736	0.0254056	downreg
ENSMUSG00000020211	Sf3a2	splicing factor 3a, subunit 2	0.257107	3.03223	0	0.985661	1	unchanged
ENSMUSG00000020219	Timm13	translocase of inner mitochondrial membrane 13	-0.333737	6.32723	0	0.999952	1	unchanged
ENSMUSG00000020220	Vps13d	vacuolar protein sorting 13D	-0.15364	4.98046	0	0.999999	1	unchanged
ENSMUSG00000020224	Llph	LLP homolog, long-term synaptic facilitation (Aplysia)	0.030168	4.20131	0	0.999999	1	unchanged
ENSMUSG00000020225	Tmbim4	transmembrane BAX inhibitor motif containing 4	0.304279	6.78785	0	0.999997	1	unchanged
ENSMUSG00000020227	Irak3	interleukin-1 receptor-associated kinase 3	3.66614	2.04356	2.77782	0.00612466	0.0806362	unchanged
ENSMUSG00000020228	Helb	helicase (DNA) B	0.484888	3.29769	0	0.982483	1	unchanged
ENSMUSG00000020230	Prmt2	protein arginine N-methyltransferase 2	1.29503	1.72221	0.854616	0.201809	1	unchanged
ENSMUSG00000020231	Dip2a	disco interacting protein 2 homolog A	0.0667285	1.11043	0	0.99401	1	unchanged
ENSMUSG00000020232	Hmg20b	high mobility group 20B	-0.310374	4.47189	0	0.999775	1	unchanged
ENSMUSG00000020235	Fzr1	fizzy and cell division cycle 20 related 1	-0.0158396	4.0786	0	0.999997	1	unchanged
ENSMUSG00000020238	Ncln	nicalin	0.0617186	5.45155	0	0.999999	1	unchanged
ENSMUSG00000020241	Col6a2	collagen, type VI, alpha 2	0.492514	1.75255	0	0.901797	1	unchanged
ENSMUSG00000020246	Hcfc2	host cell factor C2	0.00987838	3.93166	0	0.999998	1	unchanged
ENSMUSG00000020248	Nfyb	nuclear transcription factor-Y beta	-0.0978493	5.63967	0	1	1	unchanged
ENSMUSG00000020250	Txnrd1	thioredoxin reductase 1	0.244386	6.26512	0	0.99996	1	unchanged
ENSMUSG00000020253	Ppm1m	protein phosphatase 1M	-0.0353329	4.04322	0	0.999857	1	unchanged
ENSMUSG00000020255	Nopchap1	NOP protein chaperone 1	0.0300043	4.04774	0	0.999999	1	unchanged
ENSMUSG00000020257	Wdr82	WD repeat domain containing 82	0.0155429	4.49145	0	0.999998	1	unchanged
ENSMUSG00000020258	Glyctk	glycerate kinase	-0.461928	7.52124	0	0.999324	1	unchanged
ENSMUSG00000020260	Pofut2	protein O-fucosyltransferase 2	0.214211	4.21923	0	0.999904	1	unchanged
ENSMUSG00000020261	Slc36a1	solute carrier family 36 (proton/amino acid symporter), member 1	0.64136	5.44026	0	0.959766	1	unchanged
ENSMUSG00000020262	Adarb1	adenosine deaminase, RNA-specific, B1	-0.485923	2.44146	0	0.96382	1	unchanged
ENSMUSG00000020263	Appl2	adaptor protein, phosphotyrosine interaction, PH domain and leucine zipper containing 2	-0.835769	3.70316	0	0.774244	1	unchanged
ENSMUSG00000020265	Sumo3	small ubiquitin-like modifier 3	-0.0485101	8.06046	0	0.999999	1	unchanged
ENSMUSG00000020267	Hint1	histidine triad nucleotide binding protein 1	-0.372349	8.98525	0	0.999993	1	unchanged
ENSMUSG00000020268	Lyrm7	LYR motif containing 7	-1.07584	0.725149	-0.191983	0.42494	1	unchanged
ENSMUSG00000020271	Fbxw11	F-box and WD-40 domain protein 11	0.0347414	4.78935	0	0.999999	1	unchanged
ENSMUSG00000020272	Stk10	serine/threonine kinase 10	2.04987	2.65292	2.6594	0.00782638	0.0981667	unchanged
ENSMUSG00000020273	Papolg	poly(A) polymerase gamma	0.204342	1.62534	0	0.980628	1	unchanged
ENSMUSG00000020275	Rel	reticuloendotheliosis oncogene	1.36152	2.03987	0.830289	0.208458	1	unchanged
ENSMUSG00000020277	Pfkl	phosphofructokinase, liver, B-type	0.361532	4.98305	0	0.995682	1	unchanged
ENSMUSG00000020280	Pus10	pseudouridylate synthase 10	0.031793	3.07082	0	0.99959	1	unchanged
ENSMUSG00000020282	Rhbdf1	rhomboid 5 homolog 1	0.394442	2.3222	0	0.969394	1	unchanged
ENSMUSG00000020283	Pex13	peroxisomal biogenesis factor 13	-0.391767	4.64818	0	0.999815	1	unchanged
ENSMUSG00000020284	Cfap410	cilia and flagella associated protein 410	0.41505	2.51168	0	0.987554	1	unchanged
ENSMUSG00000020287	Mpg	N-methylpurine-DNA glycosylase	0.026882	3.8747	0	0.999999	1	unchanged
ENSMUSG00000020288	Ahsa2	AHA1, activator of heat shock protein ATPase 2	0.100497	4.87683	0	0.999978	1	unchanged
ENSMUSG00000020289	Nprl3	nitrogen permease regulator-like 3	-0.409333	2.74466	0	0.967347	1	unchanged
ENSMUSG00000020290	Xpo1	exportin 1	0.453099	4.9705	0	0.999805	1	unchanged
ENSMUSG00000020300	Cpeb4	cytoplasmic polyadenylation element binding protein 4	0.0394596	4.80851	0	0.99985	1	unchanged
ENSMUSG00000020305	Asb3	ankyrin repeat and SOCS box-containing 3	-0.0230491	2.96521	0	0.999922	1	unchanged
ENSMUSG00000020307	Cdc34	cell division cycle 34	-0.0737758	6.55393	0	1	1	unchanged
ENSMUSG00000020308	Tpgs1	tubulin polyglutamylase complex subunit 1	0.0540105	4.26221	0	0.999994	1	unchanged
ENSMUSG00000020309	Chac2	ChaC, cation transport regulator 2	-0.61229	2.21109	0	0.939954	1	unchanged
ENSMUSG00000020311	Erlec1	endoplasmic reticulum lectin 1	0.0251719	4.62351	0	0.999999	1	unchanged
ENSMUSG00000020315	Sptbn1	spectrin beta, non-erythrocytic 1	0.0454898	6.39995	0	1	1	unchanged
ENSMUSG00000020319	Wdpcp	WD repeat containing planar cell polarity effector	0.473752	-0.0920486	0	0.868146	1	unchanged
ENSMUSG00000020321	Mdh1	malate dehydrogenase 1, NAD (soluble)	-0.695816	8.72533	0	0.989226	1	unchanged
ENSMUSG00000020325	Fstl3	follistatin-like 3	2.10843	1.20879	1.76296	0.047195	0.404468	unchanged
ENSMUSG00000020326	Ccng1	cyclin G1	0.443292	5.04398	0	0.99935	1	unchanged
ENSMUSG00000020328	Nudcd2	NudC domain containing 2	0.0709431	5.34286	0	1	1	unchanged
ENSMUSG00000020329	Polrmt	polymerase (RNA) mitochondrial (DNA directed)	-0.271054	3.71165	0	0.999185	1	unchanged
ENSMUSG00000020330	Hmmr	hyaluronan mediated motility receptor (RHAMM)	2.95433	1.89302	2.07922	0.0260753	0.25457	unchanged
ENSMUSG00000020334	Slc22a4	solute carrier family 22 (organic cation transporter), member 4	0.213601	-0.739453	0	0.911825	1	unchanged
ENSMUSG00000020340	Cyfip2	cytoplasmic FMR1 interacting protein 2	3.589	2.5902	4.28059	0.000209968	0.00558388	upreg
ENSMUSG00000020346	Mgat1	mannoside acetylglucosaminyltransferase 1	-0.116012	6.13365	0	0.999998	1	unchanged
ENSMUSG00000020349	Ppp2ca	protein phosphatase 2 (formerly 2A), catalytic subunit, alpha isoform	-0.0517767	6.64958	0	1	1	unchanged
ENSMUSG00000020357	Flt4	FMS-like tyrosine kinase 4	0.898053	4.76359	0	0.714002	1	unchanged
ENSMUSG00000020358	Hnrnpab	heterogeneous nuclear ribonucleoprotein A/B	0.0396212	7.24415	0	1	1	unchanged
ENSMUSG00000020359	Phykpl	5-phosphohydroxy-L-lysine phospholyase	-0.253485	3.76477	0	0.999138	1	unchanged
ENSMUSG00000020361	Hspa4	heat shock protein 4	-0.0261881	6.99799	0	1	1	unchanged
ENSMUSG00000020362	Cnot6	CCR4-NOT transcription complex, subunit 6	-0.172499	5.62794	0	1	1	unchanged
ENSMUSG00000020363	Gfpt2	glutamine fructose-6-phosphate transaminase 2	3.09465	-0.902902	2.63533	0.00826882	0.102581	unchanged
ENSMUSG00000020364	Zfp354a	zinc finger protein 354A	-1.06837	0.92945	-0.1983	0.422483	1	unchanged
ENSMUSG00000020366	Mapk9	mitogen-activated protein kinase 9	0.05697	5.07563	0	1	1	unchanged
ENSMUSG00000020368	Canx	calnexin	0.0151683	7.99382	0	1	1	unchanged
ENSMUSG00000020372	Rack1	receptor for activated C kinase 1	-0.00294421	8.76865	0	1	1	unchanged
ENSMUSG00000020375	Rufy1	RUN and FYVE domain containing 1	-0.104001	3.89082	0	0.999997	1	unchanged
ENSMUSG00000020376	Rnf130	ring finger protein 130	0.399751	3.97891	0	0.976861	1	unchanged
ENSMUSG00000020377	Ltc4s	leukotriene C4 synthase	2.014	0.291122	1.43987	0.0834548	0.622998	unchanged
ENSMUSG00000020380	Rad50	RAD50 double strand break repair protein	0.301573	4.17216	0	0.99949	1	unchanged
ENSMUSG00000020381	Mrnip	MRN complex interacting protein	-0.599839	2.23875	0	0.898876	1	unchanged
ENSMUSG00000020385	Clk4	CDC like kinase 4	0.0549692	4.17647	0	1	1	unchanged
ENSMUSG00000020386	Sar1b	secretion associated Ras related GTPase 1B	-1.00312	7.24685	-0.0209357	0.49176	1	unchanged
ENSMUSG00000020387	Jade2	jade family PHD finger 2	0.717851	4.20061	0	0.914236	1	unchanged
ENSMUSG00000020388	Pdlim4	PDZ and LIM domain 4	1.38725	2.66711	0.881392	0.194681	1	unchanged
ENSMUSG00000020390	Ube2b	ubiquitin-conjugating enzyme E2B	-0.516387	6.14264	0	0.999528	1	unchanged
ENSMUSG00000020392	Cdkn2aipnl	CDKN2A interacting protein N-terminal like	0.250659	3.79153	0	0.999312	1	unchanged
ENSMUSG00000020393	Kremen1	kringle containing transmembrane protein 1	-0.0308489	2.30777	0	0.997654	1	unchanged
ENSMUSG00000020395	Itk	IL2 inducible T cell kinase	4.43129	-0.444551	3.82157	0.000596997	0.0131654	upreg
ENSMUSG00000020397	Med7	mediator complex subunit 7	0.166113	4.00782	0	0.999825	1	unchanged
ENSMUSG00000020399	Havcr2	hepatitis A virus cellular receptor 2	4.3978	-0.55439	3.521	0.00118026	0.0225608	upreg
ENSMUSG00000020400	Tnip1	TNFAIP3 interacting protein 1	1.44761	4.97985	1.88614	0.0374778	0.341264	unchanged
ENSMUSG00000020402	Vdac1	voltage-dependent anion channel 1	-0.561455	7.23942	0	0.999826	1	unchanged
ENSMUSG00000020407	Upp1	uridine phosphorylase 1	3.51317	3.50628	6.4756	1.82184e-06	0.000123234	upreg
ENSMUSG00000020409	Slu7	SLU7 splicing factor homolog (S. cerevisiae)	0.187375	5.65497	0	1	1	unchanged
ENSMUSG00000020412	Ascc2	activating signal cointegrator 1 complex subunit 2	0.146863	4.06585	0	0.999992	1	unchanged
ENSMUSG00000020413	Hus1	HUS1 checkpoint clamp component	0.289102	1.7713	0	0.976901	1	unchanged
ENSMUSG00000020415	Pttg1	pituitary tumor-transforming gene 1	-0.251485	5.94302	0	1	1	unchanged
ENSMUSG00000020420	Zfp607a	zinc finger protein 607A	-0.366571	-0.100816	0	0.877306	1	unchanged
ENSMUSG00000020422	Tns3	tensin 3	0.680281	4.61982	0	0.975975	1	unchanged
ENSMUSG00000020423	Btg2	BTG anti-proliferation factor 2	0.723488	4.46496	0	0.800692	1	unchanged
ENSMUSG00000020424	Castor1	cytosolic arginine sensor for mTORC1 subunit 1	-0.00957498	0.350227	0	0.998237	1	unchanged
ENSMUSG00000020427	Igfbp3	insulin-like growth factor binding protein 3	-1.53256	2.61371	-1.5119	0.073664	0.568389	unchanged
ENSMUSG00000020429	Igfbp1	insulin-like growth factor binding protein 1	-0.193606	7.46306	0	0.908705	1	unchanged
ENSMUSG00000020430	Pes1	pescadillo ribosomal biogenesis factor 1	0.0949171	4.21829	0	0.999997	1	unchanged
ENSMUSG00000020431	Adcy1	adenylate cyclase 1	-0.610633	-0.950389	0	0.71006	1	unchanged
ENSMUSG00000020432	Tcn2	transcobalamin 2	-0.0562722	5.67673	0	1	1	unchanged
ENSMUSG00000020435	Osbp2	oxysterol binding protein 2	-1.38714	-0.604263	-0.548452	0.296544	1	unchanged
ENSMUSG00000020437	Myo1g	myosin IG	3.97853	2.52201	5.10826	3.31091e-05	0.00135482	upreg
ENSMUSG00000020439	Smtn	smoothelin	-0.0365766	2.29222	0	0.999205	1	unchanged
ENSMUSG00000020440	Arf5	ADP-ribosylation factor 5	-0.291081	6.42259	0	0.999089	1	unchanged
ENSMUSG00000020441	2310033P09Rik	RIKEN cDNA 2310033P09 gene	0.217917	4.37749	0	0.999976	1	unchanged
ENSMUSG00000020444	Guk1	guanylate kinase 1	-0.395458	5.62656	0	0.99998	1	unchanged
ENSMUSG00000020448	Rnf185	ring finger protein 185	-0.0194566	4.86349	0	0.999999	1	unchanged
ENSMUSG00000020451	Limk2	LIM domain kinase 2	0.636763	2.57394	0	0.90699	1	unchanged
ENSMUSG00000020453	Patz1	POZ (BTB) and AT hook containing zinc finger 1	0.949162	0.841263	0	0.534577	1	unchanged
ENSMUSG00000020454	Eif4enif1	eukaryotic translation initiation factor 4E nuclear import factor 1	0.181146	3.0457	0	0.999508	1	unchanged
ENSMUSG00000020455	Trim11	tripartite motif-containing 11	0.543518	4.71281	0	0.986529	1	unchanged
ENSMUSG00000020456	Ogdh	oxoglutarate (alpha-ketoglutarate) dehydrogenase (lipoamide)	-0.289385	6.48783	0	0.999962	1	unchanged
ENSMUSG00000020457	Drg1	developmentally regulated GTP binding protein 1	-0.0627571	4.78462	0	1	1	unchanged
ENSMUSG00000020458	Rtn4	reticulon 4	0.649935	6.29869	0	0.976663	1	unchanged
ENSMUSG00000020459	Mtif2	mitochondrial translational initiation factor 2	-0.543033	3.53005	0	0.992339	1	unchanged
ENSMUSG00000020460	Rps27a	ribosomal protein S27A	-0.189779	6.76957	0	0.999978	1	unchanged
ENSMUSG00000020462	Cfap36	cilia and flagella associated protein 36	-0.108078	3.21417	0	0.999832	1	unchanged
ENSMUSG00000020463	Ppp4r3b	protein phosphatase 4 regulatory subunit 3B	-0.174341	5.54423	0	1	1	unchanged
ENSMUSG00000020464	Pnpt1	polyribonucleotide nucleotidyltransferase 1	0.843004	2.09313	0	0.666746	1	unchanged
ENSMUSG00000020467	Efemp1	epidermal growth factor-containing fibulin-like extracellular matrix protein 1	-0.0017452	2.64657	0	0.999988	1	unchanged
ENSMUSG00000020471	Pold2	polymerase (DNA directed), delta 2, regulatory subunit	-0.372318	3.31401	0	0.996451	1	unchanged
ENSMUSG00000020472	Zkscan17	zinc finger with KRAB and SCAN domains 17	-0.0341725	3.16571	0	0.999888	1	unchanged
ENSMUSG00000020473	Aebp1	AE binding protein 1	0.328179	0.393024	0	0.877765	1	unchanged
ENSMUSG00000020474	Polm	polymerase (DNA directed), mu	0.113554	1.88252	0	0.99375	1	unchanged
ENSMUSG00000020476	Dbnl	drebrin-like	1.38533	5.65261	2.61081	0.00867995	0.106653	unchanged
ENSMUSG00000020477	Mrps24	mitochondrial ribosomal protein S24	-0.448078	5.65491	0	0.999417	1	unchanged
ENSMUSG00000020482	Ccdc117	coiled-coil domain containing 117	-0.00947758	4.4055	0	0.999999	1	unchanged
ENSMUSG00000020483	Dynll2	dynein light chain LC8-type 2	-0.800171	7.30524	0	0.953949	1	unchanged
ENSMUSG00000020484	Xbp1	X-box binding protein 1	0.0618559	7.65821	0	1	1	unchanged
ENSMUSG00000020485	Supt4a	SPT4A, DSIF elongation factor subunit	-0.573171	2.32403	0	0.90587	1	unchanged
ENSMUSG00000020486	Septin4	septin 4	-0.0912977	4.07143	0	0.999817	1	unchanged
ENSMUSG00000020491	2810021J22Rik	RIKEN cDNA 2810021J22 gene	-0.165349	-0.194427	0	0.946009	1	unchanged
ENSMUSG00000020492	Ska2	spindle and kinetochore associated complex subunit 2	1.47834	0.984751	1.04477	0.154762	0.991224	unchanged
ENSMUSG00000020495	Smg8	SMG8 nonsense mediated mRNA decay factor	-0.00818168	1.7618	0	0.999747	1	unchanged
ENSMUSG00000020496	Rnf187	ring finger protein 187	-0.369827	6.72038	0	0.999997	1	unchanged
ENSMUSG00000020513	Tubd1	tubulin, delta 1	0.102085	1.41864	0	0.994088	1	unchanged
ENSMUSG00000020514	Mrpl22	mitochondrial ribosomal protein L22	-0.463131	4.02855	0	0.997751	1	unchanged
ENSMUSG00000020515	Cnot8	CCR4-NOT transcription complex, subunit 8	0.0440412	4.7144	0	1	1	unchanged
ENSMUSG00000020516	Rps6kb1	ribosomal protein S6 kinase, polypeptide 1	-0.117483	5.42261	0	0.999997	1	unchanged
ENSMUSG00000020519	Sap30l	SAP30-like	-0.198776	4.83133	0	0.999997	1	unchanged
ENSMUSG00000020520	Galnt10	polypeptide N-acetylgalactosaminyltransferase 10	0.188628	2.68675	0	0.993941	1	unchanged
ENSMUSG00000020521	Rnft1	ring finger protein, transmembrane 1	-0.361821	3.51321	0	0.998145	1	unchanged
ENSMUSG00000020522	Mfap3	microfibrillar-associated protein 3	0.713779	4.8223	0	0.983559	1	unchanged
ENSMUSG00000020523	Fam114a2	family with sequence similarity 114, member A2	-0.250925	5.97232	0	1	1	unchanged
ENSMUSG00000020525	Ppm1d	protein phosphatase 1D magnesium-dependent, delta isoform	0.102089	1.817	0	0.992554	1	unchanged
ENSMUSG00000020526	Znhit3	zinc finger, HIT type 3	-0.145332	2.34915	0	0.997919	1	unchanged
ENSMUSG00000020527	Myo19	myosin XIX	0.422086	1.52023	0	0.907855	1	unchanged
ENSMUSG00000020528	Prpsap2	phosphoribosyl pyrophosphate synthetase-associated protein 2	0.277538	2.3305	0	0.98917	1	unchanged
ENSMUSG00000020530	Ggnbp2	gametogenetin binding protein 2	-0.0222452	7.43269	0	1	1	unchanged
ENSMUSG00000020532	Acaca	acetyl-Coenzyme A carboxylase alpha	-0.788181	5.69269	0	0.763091	1	unchanged
ENSMUSG00000020534	Shmt1	serine hydroxymethyltransferase 1 (soluble)	-1.1858	6.25611	-1.17052	0.128271	0.865891	unchanged
ENSMUSG00000020536	Llgl1	LLGL1 scribble cell polarity complex component	0.518777	2.89062	0	0.937494	1	unchanged
ENSMUSG00000020537	Drg2	developmentally regulated GTP binding protein 2	-0.0420547	3.84069	0	0.99998	1	unchanged
ENSMUSG00000020538	Srebf1	sterol regulatory element binding transcription factor 1	-1.07319	5.30243	-0.207463	0.418955	1	unchanged
ENSMUSG00000020541	Tom1l1	target of myb1-like 1 (chicken)	-0.780239	2.86867	0	0.831486	1	unchanged
ENSMUSG00000020544	Cox11	cytochrome c oxidase assembly protein 11, copper chaperone	-0.429551	2.91457	0	0.991125	1	unchanged
ENSMUSG00000020546	Stxbp4	syntaxin binding protein 4	0.0196729	1.02281	0	0.997199	1	unchanged
ENSMUSG00000020547	Bzw2	basic leucine zipper and W2 domains 2	0.480388	4.05898	0	0.996445	1	unchanged
ENSMUSG00000020549	Elac2	elaC ribonuclease Z 2	-0.220875	3.63469	0	0.999946	1	unchanged
ENSMUSG00000020553	Pctp	phosphatidylcholine transfer protein	-1.56381	5.98874	-3.85715	0.000546736	0.0123447	downreg
ENSMUSG00000020561	Polr1f	RNA polymerase I subunit F	-0.157997	5.57171	0	0.999999	1	unchanged
ENSMUSG00000020564	Atxn7l1	ataxin 7-like 1	-0.2983	3.69534	0	0.999823	1	unchanged
ENSMUSG00000020570	Sypl1	synaptophysin like 1	-0.244971	5.66678	0	0.999999	1	unchanged
ENSMUSG00000020571	Pdia6	protein disulfide isomerase associated 6	0.553189	8.54415	0	0.99737	1	unchanged
ENSMUSG00000020572	Nampt	nicotinamide phosphoribosyltransferase	1.9837	6.44023	4.90541	5.1758e-05	0.00196059	upreg
ENSMUSG00000020573	Pik3cg	phosphatidylinositol-4,5-bisphosphate 3-kinase catalytic subunit gamma	1.79794	1.36094	1.29272	0.10607	0.747625	unchanged
ENSMUSG00000020576	Nbas	neuroblastoma amplified sequence	0.32563	3.5932	0	0.998972	1	unchanged
ENSMUSG00000020577	Tspan13	tetraspanin 13	1.81395	2.57469	1.85347	0.0398576	0.357774	unchanged
ENSMUSG00000020580	Rock2	Rho-associated coiled-coil containing protein kinase 2	0.292974	5.29907	0	0.999977	1	unchanged
ENSMUSG00000020585	Laptm4a	lysosomal-associated protein transmembrane 4A	0.380072	8.66644	0	0.999994	1	unchanged
ENSMUSG00000020589	Cyria	CYFIP related Rac1 interactor A	2.48559	3.2898	4.00888	0.000387777	0.00936456	upreg
ENSMUSG00000020590	Snx13	sorting nexin 13	-0.296532	3.72061	0	0.999754	1	unchanged
ENSMUSG00000020592	Sdc1	syndecan 1	0.0331456	7.35423	0	0.999998	1	unchanged
ENSMUSG00000020593	Lpin1	lipin 1	-1.32631	6.52571	-0.446419	0.332713	1	unchanged
ENSMUSG00000020594	Pum2	pumilio RNA-binding family member 2	0.102243	5.4449	0	0.999998	1	unchanged
ENSMUSG00000020600	Slc7a15	solute carrier family 7 (cationic amino acid transporter, y+ system), member 15	-0.451305	-1.50819	0	0.787747	1	unchanged
ENSMUSG00000020601	Trib2	tribbles pseudokinase 2	0.348753	2.45092	0	0.979734	1	unchanged
ENSMUSG00000020604	Arsg	arylsulfatase G	-0.660034	3.44981	0	0.883335	1	unchanged
ENSMUSG00000020605	Hs1bp3	HCLS1 binding protein 3	-0.349564	3.03941	0	0.994566	1	unchanged
ENSMUSG00000020607	Lratd1	LRAT domain containing 1	1.05662	0.881835	0.0977612	0.462675	1	unchanged
ENSMUSG00000020608	Smc6	structural maintenance of chromosomes 6	-0.00364528	5.46153	0	1	1	unchanged
ENSMUSG00000020609	Apob	apolipoprotein B	-0.0279744	7.67524	0	0.999985	1	unchanged
ENSMUSG00000020610	Amz2	archaelysin family metallopeptidase 2	-0.136311	4.24771	0	0.99998	1	unchanged
ENSMUSG00000020611	Gna13	guanine nucleotide binding protein, alpha 13	0.994199	5.97797	0	0.51822	1	unchanged
ENSMUSG00000020612	Prkar1a	protein kinase, cAMP dependent regulatory, type I, alpha	-0.0401256	7.34911	0	1	1	unchanged
ENSMUSG00000020614	Fam20a	FAM20A, golgi associated secretory pathway pseudokinase	-0.556202	4.51734	0	0.985311	1	unchanged
ENSMUSG00000020620	Abca8b	ATP-binding cassette, sub-family A member 8b	-1.01611	4.44998	-0.104732	0.458854	1	unchanged
ENSMUSG00000020621	Rdh14	retinol dehydrogenase 14 (all-trans and 9-cis)	-0.622817	4.28362	0	0.990276	1	unchanged
ENSMUSG00000020623	Map2k6	mitogen-activated protein kinase kinase 6	0.172843	0.347166	0	0.941367	1	unchanged
ENSMUSG00000020628	Trappc12	trafficking protein particle complex 12	-0.248011	3.69622	0	0.999756	1	unchanged
ENSMUSG00000020629	Adi1	acireductone dioxygenase 1	-1.00392	5.56399	-0.0267358	0.489477	1	unchanged
ENSMUSG00000020630	Rnaseh1	ribonuclease H1	1.08434	1.18855	0.162154	0.436854	1	unchanged
ENSMUSG00000020634	Ubxn2a	UBX domain protein 2A	0.148609	2.98128	0	0.999799	1	unchanged
ENSMUSG00000020635	Fkbp1b	FK506 binding protein 1b	3.49429	-0.396884	2.89859	0.00469273	0.0644061	unchanged
ENSMUSG00000020638	Cmpk2	cytidine/uridine monophosphate kinase 2	1.8955	3.34923	2.40095	0.013484	0.151848	unchanged
ENSMUSG00000020640	Itsn2	intersectin 2	0.329279	4.78241	0	0.999789	1	unchanged
ENSMUSG00000020641	Rsad2	radical S-adenosyl methionine domain containing 2	2.13953	5.36478	3.20796	0.00235771	0.0379351	upreg
ENSMUSG00000020642	Rnf144a	ring finger protein 144A	-0.473532	3.60254	0	0.984581	1	unchanged
[truncated: 11,259 more rows]

## Sheet: NI_D10
Ensembl_ID	gene_symbol	gene_name	logFC	AveExpr	t	P.Value	adj.P.Val	Status
ENSMUSG00000000001	Gnai3	G protein subunit alpha i3	-0.431876	4.80911	0	0.99969	1	unchanged
ENSMUSG00000000028	Cdc45	cell division cycle 45	1.99363	0.513625	1.32021	0.101791	0.73146	unchanged
ENSMUSG00000000031	H19	H19, imprinted maternally expressed transcript	3.39908	0.899838	1.44776	0.0900532	0.671122	unchanged
ENSMUSG00000000049	Apoh	apolipoprotein H	-0.0461215	10.2249	0	1	1	unchanged
ENSMUSG00000000056	Narf	nuclear prelamin A recognition factor	-0.00768709	2.42242	0	0.999947	1	unchanged
ENSMUSG00000000058	Cav2	caveolin 2	0.529915	1.67252	0	0.89826	1	unchanged
ENSMUSG00000000078	Klf6	Kruppel-like transcription factor 6	1.73325	4.74854	4.08677	0.000325088	0.00915079	upreg
ENSMUSG00000000085	Scmh1	sex comb on midleg homolog 1	-0.342068	3.65085	0	0.997537	1	unchanged
ENSMUSG00000000088	Cox5a	cytochrome c oxidase subunit 5A	-0.698955	8.14167	0	0.989471	1	unchanged
ENSMUSG00000000093	Tbx2	T-box 2	1.0099	2.28783	0.0209202	0.491991	1	unchanged
ENSMUSG00000000120	Ngfr	nerve growth factor receptor (TNFR superfamily, member 16)	0.703582	2.64351	0	0.789166	1	unchanged
ENSMUSG00000000127	Fer	FER tyrosine kinase	0.46661	3.03109	0	0.983594	1	unchanged
ENSMUSG00000000131	Xpo6	exportin 6	0.158128	3.93876	0	0.999869	1	unchanged
ENSMUSG00000000134	Tfe3	transcription factor E3	0.298788	4.62625	0	0.999956	1	unchanged
ENSMUSG00000000142	Axin2	axin 2	-0.178652	1.20211	0	0.934097	1	unchanged
ENSMUSG00000000148	Brat1	BRCA1-associated ATM activator 1	-0.320533	0.981139	0	0.934134	1	unchanged
ENSMUSG00000000149	Gna12	guanine nucleotide binding protein, alpha 12	0.262601	4.39756	0	0.999761	1	unchanged
ENSMUSG00000000154	Slc22a18	solute carrier family 22 (organic cation transporter), member 18	-0.355563	6.34426	0	0.999761	1	unchanged
ENSMUSG00000000159	Igsf5	immunoglobulin superfamily, member 5	-0.593847	4.79326	0	0.99447	1	unchanged
ENSMUSG00000000167	Pih1d2	PIH1 domain containing 2	0.223975	-0.00160626	0	0.91682	1	unchanged
ENSMUSG00000000168	Dlat	dihydrolipoamide S-acetyltransferase	-1.11963	4.66678	-0.687048	0.250256	1	unchanged
ENSMUSG00000000171	Sdhd	succinate dehydrogenase complex, subunit D, integral membrane protein	-1.16712	4.30563	-0.331819	0.372064	1	unchanged
ENSMUSG00000000184	Ccnd2	cyclin D2	0.927617	6.5087	0	0.692663	1	unchanged
ENSMUSG00000000194	Gpr107	G protein-coupled receptor 107	0.593879	4.25979	0	0.9783	1	unchanged
ENSMUSG00000000204	Slfn4	schlafen 4	3.77166	-0.651124	3.39561	0.00155631	0.030085	upreg
ENSMUSG00000000244	Tspan32	tetraspanin 32	3.14672	1.063	2.72187	0.00686926	0.0938894	unchanged
ENSMUSG00000000247	Lhx2	LIM homeobox protein 2	0.21801	2.59061	0	0.994854	1	unchanged
ENSMUSG00000000253	Gmpr	guanosine monophosphate reductase	0.0370036	1.16184	0	0.999549	1	unchanged
ENSMUSG00000000266	Mid2	midline 2	0.0367927	2.11458	0	0.997896	1	unchanged
ENSMUSG00000000275	Trim25	tripartite motif-containing 25	0.138801	6.38508	0	0.999991	1	unchanged
ENSMUSG00000000276	Dgke	diacylglycerol kinase, epsilon	1.40511	0.898573	0.806312	0.215182	1	unchanged
ENSMUSG00000000278	Scpep1	serine carboxypeptidase 1	0.285108	6.17945	0	0.999997	1	unchanged
ENSMUSG00000000282	Mnt	max binding protein	0.712089	3.17209	0	0.91104	1	unchanged
ENSMUSG00000000290	Itgb2	integrin beta 2	3.78384	4.75261	6.20902	3.14879e-06	0.000247022	upreg
ENSMUSG00000000295	Hddc2	HD domain containing 2	1.02455	1.43286	0.0582132	0.477165	1	unchanged
ENSMUSG00000000296	Tpd52l1	tumor protein D52-like 1	-0.552441	2.47004	0	0.954411	1	unchanged
ENSMUSG00000000301	Pemt	phosphatidylethanolamine N-methyltransferase	-0.192122	7.96642	0	0.999996	1	unchanged
ENSMUSG00000000303	Cdh1	cadherin 1	-1.43769	5.79015	-2.08761	0.0254047	0.255745	unchanged
ENSMUSG00000000305	Cdh4	cadherin 4	-0.00733112	-0.177914	0	0.997696	1	unchanged
ENSMUSG00000000317	Bcl6b	B cell CLL/lymphoma 6, member B	1.05941	2.10682	0.145419	0.443009	1	unchanged
ENSMUSG00000000318	Clec10a	C-type lectin domain family 10, member A	1.42741	1.26501	0.729643	0.237625	1	unchanged
ENSMUSG00000000320	Alox12	arachidonate 12-lipoxygenase	2.5923	2.38876	3.28826	0.00197119	0.0357022	upreg
ENSMUSG00000000325	NA	NA	0.652757	2.04011	0	0.837914	1	unchanged
ENSMUSG00000000326	Comt	catechol-O-methyltransferase	-0.963122	8.23894	0	0.600643	1	unchanged
ENSMUSG00000000339	Rtca	RNA 3'-terminal phosphate cyclase	0.307971	3.65735	0	0.999363	1	unchanged
ENSMUSG00000000340	Dbt	dihydrolipoamide branched chain transacylase E2	-0.844344	5.77765	0	0.905254	1	unchanged
ENSMUSG00000000346	Dazap2	DAZ associated protein 2	0.127647	7.20582	0	1	1	unchanged
ENSMUSG00000000355	Mcts1	malignant T cell amplified sequence 1	-0.312415	5.53891	0	0.999956	1	unchanged
ENSMUSG00000000374	Trappc10	trafficking protein particle complex 10	-0.294798	3.72749	0	0.999629	1	unchanged
ENSMUSG00000000378	Ccm2	cerebral cavernous malformation 2	-0.237042	3.90582	0	0.999727	1	unchanged
ENSMUSG00000000384	Tbrg4	transforming growth factor beta regulated gene 4	-0.116944	4.63612	0	0.999999	1	unchanged
ENSMUSG00000000385	Tmprss2	transmembrane protease, serine 2	1.28692	3.63557	1.02232	0.159858	1	unchanged
ENSMUSG00000000386	Mx1	MX dynamin-like GTPase 1	1.82453	1.42804	1.11398	0.140322	0.926513	unchanged
ENSMUSG00000000399	Ndufa9	NADH:ubiquinone oxidoreductase subunit A9	-0.689519	6.2293	0	0.987599	1	unchanged
ENSMUSG00000000409	Lck	lymphocyte protein tyrosine kinase	2.24141	2.45554	2.3763	0.0141918	0.165775	unchanged
ENSMUSG00000000420	Galnt1	polypeptide N-acetylgalactosaminyltransferase 1	0.0751603	5.34541	0	0.999999	1	unchanged
ENSMUSG00000000439	Mkrn2	makorin, ring finger protein, 2	-0.329248	3.0211	0	0.998574	1	unchanged
ENSMUSG00000000440	Pparg	peroxisome proliferator activated receptor gamma	-0.179577	2.99535	0	0.987643	1	unchanged
ENSMUSG00000000441	Raf1	v-raf-leukemia viral oncogene 1	-0.463551	3.80491	0	0.987067	1	unchanged
ENSMUSG00000000486	Septin1	septin 1	0.765868	0.961995	0	0.659481	1	unchanged
ENSMUSG00000000489	Pdgfb	platelet derived growth factor, B polypeptide	2.20935	1.12971	1.59026	0.0645367	0.519507	unchanged
ENSMUSG00000000530	Acvrl1	activin A receptor, type II-like 1	2.45808	3.38613	4.463	0.000139069	0.00471553	upreg
ENSMUSG00000000531	Tamalin	trafficking regulator and scaffold protein tamalin	0.649847	0.757351	0	0.755124	1	unchanged
ENSMUSG00000000532	Acvr1b	activin A receptor, type 1B	0.668833	2.98292	0	0.897681	1	unchanged
ENSMUSG00000000538	Tom1l2	target of myb1-like 2 (chicken)	-0.324917	4.32581	0	0.999653	1	unchanged
ENSMUSG00000000552	Zfp385a	zinc finger protein 385A	0.755441	2.83164	0	0.819532	1	unchanged
ENSMUSG00000000555	Itga5	integrin alpha 5 (fibronectin receptor alpha)	0.0838929	1.72337	0	0.986507	1	unchanged
ENSMUSG00000000561	Wdr77	WD repeat domain 77	-0.116543	4.63945	0	0.999993	1	unchanged
ENSMUSG00000000563	Atp5pb	ATP synthase peripheral stalk-membrane subunit b	-0.746311	8.38492	0	0.969864	1	unchanged
ENSMUSG00000000567	Sox9	SRY (sex determining region Y)-box 9	0.702457	5.60354	0	0.844167	1	unchanged
ENSMUSG00000000568	Hnrnpd	heterogeneous nuclear ribonucleoprotein D	0.423816	4.88683	0	0.999584	1	unchanged
ENSMUSG00000000581	C1d	C1D nuclear receptor co-repressor	-0.35935	5.11338	0	0.999966	1	unchanged
ENSMUSG00000000594	Gm2a	GM2 ganglioside activator protein	-0.512784	7.67879	0	0.999408	1	unchanged
ENSMUSG00000000600	Krit1	KRIT1, ankyrin repeat containing	0.174391	4.01546	0	0.999993	1	unchanged
ENSMUSG00000000605	Clcn4	chloride channel, voltage-sensitive 4	-0.281847	5.90007	0	1	1	unchanged
ENSMUSG00000000628	Hk2	hexokinase 2	3.42129	4.4363	6.24728	2.90873e-06	0.000232313	upreg
ENSMUSG00000000631	Myo18a	myosin XVIIIA	0.577613	6.45934	0	0.99922	1	unchanged
ENSMUSG00000000673	Haao	3-hydroxyanthranilate 3,4-dioxygenase	-1.24171	8.18282	-1.78363	0.0453874	0.397968	unchanged
ENSMUSG00000000682	Cd52	CD52 antigen	3.4565	6.81493	13.0356	4.10501e-11	2.47383e-08	upreg
ENSMUSG00000000686	Abhd15	abhydrolase domain containing 15	0.34552	2.99223	0	0.995656	1	unchanged
ENSMUSG00000000693	Loxl3	lysyl oxidase-like 3	0.842726	1.55302	0	0.620382	1	unchanged
ENSMUSG00000000708	Kat2b	K(lysine) acetyltransferase 2B	-0.534199	5.92641	0	0.997288	1	unchanged
ENSMUSG00000000711	Rab5b	RAB5B, member RAS oncogene family	-0.481683	3.77998	0	0.995013	1	unchanged
ENSMUSG00000000732	Icosl	icos ligand	1.25072	0.692813	0.378547	0.356191	1	unchanged
ENSMUSG00000000738	Spg7	SPG7, paraplegin matrix AAA peptidase subunit	-0.573355	5.04085	0	0.998511	1	unchanged
ENSMUSG00000000739	Sult5a1	sulfotransferase family 5A, member 1	-1.13605	2.95184	-0.417983	0.340369	1	unchanged
ENSMUSG00000000740	Rpl13	ribosomal protein L13	0.124301	8.49471	0	0.999999	1	unchanged
ENSMUSG00000000743	Chmp1a	charged multivesicular body protein 1A	0.269958	5.73325	0	0.999851	1	unchanged
ENSMUSG00000000751	Rpa1	replication protein A1	-0.141396	4.63294	0	0.999975	1	unchanged
ENSMUSG00000000753	Serpinf1	serine (or cysteine) peptidase inhibitor, clade F, member 1	-1.36082	7.20865	-2.80916	0.00566957	0.0815262	unchanged
ENSMUSG00000000759	Tubgcp3	tubulin, gamma complex component 3	0.543622	2.67213	0	0.921794	1	unchanged
ENSMUSG00000000776	Polr3d	polymerase (RNA) III (DNA directed) polypeptide D	0.609563	3.74705	0	0.950662	1	unchanged
ENSMUSG00000000782	Tcf7	transcription factor 7, T cell specific	0.174712	1.62516	0	0.977218	1	unchanged
ENSMUSG00000000787	Ddx3x	DEAD box helicase 3, X-linked	0.098153	7.26165	0	1	1	unchanged
ENSMUSG00000000791	Il12rb1	interleukin 12 receptor, beta 1	2.19059	1.22416	1.81039	0.0432512	0.381774	unchanged
ENSMUSG00000000804	Usp32	ubiquitin specific peptidase 32	-0.279915	4.01383	0	0.999949	1	unchanged
ENSMUSG00000000811	Txnrd3	thioredoxin reductase 3	-0.572543	2.04616	0	0.928552	1	unchanged
ENSMUSG00000000823	Zfp512b	zinc finger protein 512B	0.16848	3.33284	0	0.999395	1	unchanged
ENSMUSG00000000826	Dnajc5	DnaJ heat shock protein family (Hsp40) member C5	0.0116086	5.7997	0	1	1	unchanged
ENSMUSG00000000827	Tpd52l2	tumor protein D52-like 2	-0.0301174	4.6079	0	0.999999	1	unchanged
ENSMUSG00000000838	Fmr1	fragile X messenger ribonucleoprotein 1	-0.00718781	3.82884	0	0.999998	1	unchanged
ENSMUSG00000000861	Bcl11a	BCL11 transcription factor A	3.12687	0.374898	3.62906	0.00091649	0.0204904	upreg
ENSMUSG00000000876	Pxmp4	peroxisomal membrane protein 4	-0.93545	6.7894	0	0.704356	1	unchanged
ENSMUSG00000000881	Dlg3	discs large MAGUK scaffold protein 3	-0.653085	4.10669	0	0.986125	1	unchanged
ENSMUSG00000000884	Gnb1l	guanine nucleotide binding protein (G protein), beta polypeptide 1-like	0.286626	0.748181	0	0.968491	1	unchanged
ENSMUSG00000000901	Mmp11	matrix metallopeptidase 11	-1.00508	-0.762851	-0.00496234	0.530775	1	unchanged
ENSMUSG00000000902	Smarcb1	SWI/SNF related, matrix associated, actin dependent regulator of chromatin, subfamily b, member 1	0.0777572	4.27022	0	0.999986	1	unchanged
ENSMUSG00000000915	Hip1r	huntingtin interacting protein 1 related	0.166564	4.01512	0	0.999776	1	unchanged
ENSMUSG00000000916	Nsun5	NOL1/NOP2/Sun domain family, member 5	-0.651371	2.49799	0	0.932153	1	unchanged
ENSMUSG00000000934	Top1mt	DNA topoisomerase 1, mitochondrial	-0.253763	3.44255	0	0.999606	1	unchanged
ENSMUSG00000000957	Mmp14	matrix metallopeptidase 14 (membrane-inserted)	1.1165	6.7526	0.663017	0.257718	1	unchanged
ENSMUSG00000000958	Slc7a7	solute carrier family 7 (cationic amino acid transporter, y+ system), member 7	1.27851	3.28961	1.10678	0.141235	0.930837	unchanged
ENSMUSG00000000959	Oxa1l	oxidase assembly 1-like	-0.30071	5.03315	0	0.999994	1	unchanged
ENSMUSG00000000976	Heatr6	HEAT repeat containing 6	-0.216317	3.55807	0	0.999671	1	unchanged
ENSMUSG00000000982	Ccl3	C-C motif chemokine ligand 3	3.21962	0.0276282	1.55064	0.0730909	0.574416	unchanged
ENSMUSG00000000983	Wfdc18	WAP four-disulfide core domain 18	2.3246	-0.604024	1.48213	0.0782525	0.60494	unchanged
ENSMUSG00000001016	Ilf2	interleukin enhancer binding factor 2	-0.106941	3.36103	0	0.999786	1	unchanged
ENSMUSG00000001017	Chtop	chromatin target of PRMT1	-0.0324102	5.35095	0	1	1	unchanged
ENSMUSG00000001018	Snapin	SNAP-associated protein	0.0843949	3.7377	0	0.999653	1	unchanged
ENSMUSG00000001020	S100a4	S100 calcium binding protein A4	3.24577	3.05335	3.28449	0.00199072	0.0359008	upreg
ENSMUSG00000001025	S100a6	S100 calcium binding protein A6 (calcyclin)	2.10554	4.38415	2.85545	0.00512731	0.0752965	unchanged
ENSMUSG00000001029	Icam2	intercellular adhesion molecule 2	0.837837	3.8404	0	0.77423	1	unchanged
ENSMUSG00000001034	Mapk7	mitogen-activated protein kinase 7	0.416537	2.06492	0	0.941434	1	unchanged
ENSMUSG00000001036	Epn2	epsin 2	-0.175191	3.07638	0	0.999228	1	unchanged
ENSMUSG00000001039	B9d1	B9 protein domain 1	0.656531	-0.339058	0	0.698105	1	unchanged
ENSMUSG00000001052	Sec24b	SEC24 homolog B, COPII coat complex component	0.150611	3.74321	0	0.99991	1	unchanged
ENSMUSG00000001053	N4bp3	NEDD4 binding protein 3	-0.711054	1.18227	0	0.733787	1	unchanged
ENSMUSG00000001054	Rmnd5b	required for meiotic nuclear division 5 homolog B	-0.0390195	3.68885	0	0.999974	1	unchanged
ENSMUSG00000001056	Nhp2	NHP2 ribonucleoprotein	-0.145123	4.28829	0	0.999998	1	unchanged
ENSMUSG00000001062	Vps9d1	VPS9 domain containing 1	-0.122276	3.53913	0	0.999741	1	unchanged
ENSMUSG00000001065	Zfp276	zinc finger protein (C2H2 type) 276	-0.127104	3.56734	0	0.999854	1	unchanged
ENSMUSG00000001082	Mfsd10	major facilitator superfamily domain containing 10	1.0458	2.6881	0.149741	0.44129	1	unchanged
ENSMUSG00000001089	Luzp1	leucine zipper protein 1	0.120895	4.64077	0	0.999989	1	unchanged
ENSMUSG00000001095	Slc13a2	solute carrier family 13 (sodium-dependent dicarboxylate transporter), member 2	-4.18184	-0.0717775	-4.97596	4.43529e-05	0.00193431	downreg
ENSMUSG00000001098	Kctd10	potassium channel tetramerisation domain containing 10	0.514375	3.50057	0	0.988495	1	unchanged
ENSMUSG00000001100	Poldip2	polymerase (DNA-directed), delta interacting protein 2	-0.376405	5.7754	0	0.999995	1	unchanged
ENSMUSG00000001105	Ift20	intraflagellar transport 20	-0.149476	7.97894	0	1	1	unchanged
ENSMUSG00000001119	Col6a1	collagen, type VI, alpha 1	0.504783	1.87421	0	0.863937	1	unchanged
ENSMUSG00000001120	Pcbp3	poly(rC) binding protein 3	-0.370213	-0.285541	0	0.851727	1	unchanged
ENSMUSG00000001123	Lgals9	lectin, galactose binding, soluble 9	-0.372508	8.6716	0	0.999505	1	unchanged
ENSMUSG00000001127	Araf	Araf proto-oncogene, serine/threonine kinase	-0.185065	5.38721	0	0.999999	1	unchanged
ENSMUSG00000001128	Cfp	complement factor properdin	2.71312	6.23488	8.10589	7.90523e-08	1.24771e-05	upreg
ENSMUSG00000001131	Timp1	tissue inhibitor of metalloproteinase 1	2.33884	0.0434032	1.50032	0.0758503	0.591195	unchanged
ENSMUSG00000001134	Uxt	ubiquitously expressed prefoldin like chaperone	0.00909463	3.93295	0	1	1	unchanged
ENSMUSG00000001138	Cnnm3	cyclin M3	-0.44834	3.94629	0	0.99763	1	unchanged
ENSMUSG00000001143	Lman2l	lectin, mannose-binding 2-like	-0.706817	3.65692	0	0.886439	1	unchanged
ENSMUSG00000001150	Mcm3ap	minichromosome maintenance complex component 3 associated protein	0.127507	3.8776	0	0.999987	1	unchanged
ENSMUSG00000001151	Pcnt	pericentrin (kendrin)	0.300951	3.68133	0	0.998697	1	unchanged
ENSMUSG00000001155	Ftcd	formiminotransferase cyclodeaminase	-0.886764	8.42673	0	0.743495	1	unchanged
ENSMUSG00000001156	Mxd1	MAX dimerization protein 1	0.687172	3.17944	0	0.802738	1	unchanged
ENSMUSG00000001157	Gmcl1	germ cell-less, spermatogenesis associated 1	-0.335353	4.15147	0	0.997626	1	unchanged
ENSMUSG00000001158	Snrnp27	small nuclear ribonucleoprotein 27 (U4/U6.U5)	0.0238832	5.15494	0	1	1	unchanged
ENSMUSG00000001166	Oas1c	2'-5' oligoadenylate synthetase 1C	0.439103	-0.276645	0	0.795876	1	unchanged
ENSMUSG00000001173	Ocrl	OCRL, inositol polyphosphate-5-phosphatase	0.775371	2.89077	0	0.80169	1	unchanged
ENSMUSG00000001175	Calm1	calmodulin 1	0.219356	9.62574	0	1	1	unchanged
ENSMUSG00000001211	Agpat3	1-acylglycerol-3-phosphate O-acyltransferase 3	0.0936009	6.73277	0	1	1	unchanged
ENSMUSG00000001227	Sema6b	sema domain, transmembrane domain (TM), and cytoplasmic domain, (semaphorin) 6B	0.929681	1.87883	0	0.580217	1	unchanged
ENSMUSG00000001228	Uhrf1	ubiquitin-like, containing PHD and RING finger domains, 1	2.44998	1.27286	2.02824	0.0285971	0.279808	unchanged
ENSMUSG00000001229	Dpp9	dipeptidylpeptidase 9	-0.176575	5.74838	0	0.999989	1	unchanged
ENSMUSG00000001240	Ramp2	receptor (calcitonin) activity modifying protein 2	0.471287	3.88671	0	0.986843	1	unchanged
ENSMUSG00000001247	Lsr	lipolysis stimulated lipoprotein receptor	-0.215502	8.48973	0	0.999346	1	unchanged
ENSMUSG00000001248	Gramd1a	GRAM domain containing 1A	0.368599	3.23383	0	0.996871	1	unchanged
ENSMUSG00000001249	Hpn	hepsin	-0.287882	7.25241	0	1	1	unchanged
ENSMUSG00000001270	Ckb	creatine kinase, brain	1.76756	3.94357	3.24366	0.0021773	0.0384377	upreg
ENSMUSG00000001280	Sp1	trans-acting transcription factor 1	0.125056	5.60421	0	1	1	unchanged
ENSMUSG00000001281	Itgb7	integrin beta 7	3.75855	2.77191	4.51483	0.000123917	0.0043348	upreg
ENSMUSG00000001285	Myg1	melanocyte proliferating gene 1	-0.181168	3.93332	0	0.999969	1	unchanged
ENSMUSG00000001288	Rarg	retinoic acid receptor, gamma	0.243826	2.74025	0	0.991503	1	unchanged
ENSMUSG00000001289	Pfdn5	prefoldin 5	0.00217431	6.49594	0	1	1	unchanged
ENSMUSG00000001300	Efnb2	ephrin B2	0.215346	-0.260918	0	0.918034	1	unchanged
ENSMUSG00000001305	Rrp15	ribosomal RNA processing 15 homolog	-0.130085	3.59458	0	0.999766	1	unchanged
ENSMUSG00000001313	Rnd2	Rho family GTPase 2	0.0559113	4.57947	0	0.999988	1	unchanged
ENSMUSG00000001323	Srr	serine racemase	-0.671277	6.01368	0	0.984741	1	unchanged
ENSMUSG00000001334	Fndc5	fibronectin type III domain containing 5	0.723368	-0.370494	0	0.676525	1	unchanged
ENSMUSG00000001348	Acp5	acid phosphatase 5, tartrate resistant	-0.209395	6.74795	0	0.999989	1	unchanged
ENSMUSG00000001366	Fbxo9	f-box protein 9	-0.465792	5.5731	0	0.999929	1	unchanged
ENSMUSG00000001376	Vps50	VPS50 EARP/GARPII complex subunit	-0.0128176	3.1861	0	0.999998	1	unchanged
ENSMUSG00000001380	Hars1	histidyl-tRNA synthetase 1	0.102156	4.49834	0	0.999999	1	unchanged
ENSMUSG00000001383	Zmat2	zinc finger, matrin type 2	-0.121249	5.95973	0	1	1	unchanged
ENSMUSG00000001403	Ube2c	ubiquitin-conjugating enzyme E2C	2.72834	3.36203	2.89648	0.00469153	0.0696532	unchanged
ENSMUSG00000001415	Smg5	SMG5 nonsense mediated mRNA decay factor	0.421493	3.32446	0	0.996596	1	unchanged
ENSMUSG00000001416	Cct3	chaperonin containing TCP1 subunit 3	-0.2286	6.72875	0	0.999996	1	unchanged
ENSMUSG00000001418	Glmp	glycosylated lysosomal membrane protein	0.126314	5.33493	0	1	1	unchanged
ENSMUSG00000001419	Mef2d	myocyte enhancer factor 2D	-0.260486	4.58084	0	0.999307	1	unchanged
ENSMUSG00000001420	Tmem79	transmembrane protein 79	-0.79084	0.183584	0	0.636579	1	unchanged
ENSMUSG00000001424	Snd1	staphylococcal nuclease and tudor domain containing 1	0.118048	6.41976	0	1	1	unchanged
ENSMUSG00000001435	Col18a1	collagen, type XVIII, alpha 1	-0.0849625	8.45764	0	1	1	unchanged
ENSMUSG00000001436	Slc19a1	solute carrier family 19 (folate transporter), member 1	0.309885	2.38593	0	0.995218	1	unchanged
ENSMUSG00000001440	Kpnb1	karyopherin subunit beta 1	-0.050736	6.00586	0	1	1	unchanged
ENSMUSG00000001441	Npepps	aminopeptidase puromycin sensitive	-0.0212786	4.7851	0	1	1	unchanged
ENSMUSG00000001444	Tbx21	T-box 21	3.20087	-0.232009	2.43425	0.0126756	0.15193	unchanged
ENSMUSG00000001445	Mrpl10	mitochondrial ribosomal protein L10	-0.532907	5.12284	0	0.998547	1	unchanged
ENSMUSG00000001467	Cyp51	cytochrome P450, family 51	0.38182	7.36787	0	0.986372	1	unchanged
ENSMUSG00000001472	Tcf25	transcription factor 25 (basic helix-loop-helix)	-0.00520674	6.97631	0	1	1	unchanged
ENSMUSG00000001473	Tubb6	tubulin, beta 6 class V	1.0978	3.61725	0.262101	0.39807	1	unchanged
ENSMUSG00000001482	Def8	differentially expressed in FDCP 8	-0.190651	4.97374	0	0.999873	1	unchanged
ENSMUSG00000001506	Col1a1	collagen, type I, alpha 1	0.723437	4.43897	0	0.746501	1	unchanged
ENSMUSG00000001507	Itga3	integrin alpha 3	-0.216647	1.52275	0	0.98984	1	unchanged
ENSMUSG00000001517	Foxm1	forkhead box M1	3.49063	1.32905	2.55266	0.00991965	0.124305	unchanged
ENSMUSG00000001518	Itfg2	integrin alpha FG-GAP repeat containing 2	0.124609	3.08087	0	0.999555	1	unchanged
ENSMUSG00000001521	Tulp3	TUB like protein 3	0.323227	0.318659	0	0.874721	1	unchanged
ENSMUSG00000001524	Gtf2h4	general transcription factor II H, polypeptide 4	-0.333568	3.32112	0	0.995389	1	unchanged
ENSMUSG00000001525	Tubb5	tubulin, beta 5 class I	0.668677	7.42023	0	0.988984	1	unchanged
ENSMUSG00000001542	Ell2	elongation factor for RNA polymerase II 2	-0.351887	5.29189	0	0.999451	1	unchanged
ENSMUSG00000001552	Jup	junction plakoglobin	0.318904	4.37225	0	0.999443	1	unchanged
ENSMUSG00000001555	Fkbp10	FK506 binding protein 10	1.73543	-0.146194	0.925613	0.184632	1	unchanged
ENSMUSG00000001569	Nom1	nucleolar protein with MIF4G domain 1	-0.231556	4.10428	0	0.999952	1	unchanged
ENSMUSG00000001576	Ergic1	endoplasmic reticulum-golgi intermediate compartment 1	-0.484329	6.02195	0	0.999721	1	unchanged
ENSMUSG00000001588	Acap1	ArfGAP with coiled-coil, ankyrin repeat and PH domains 1	1.30544	0.601799	0.484789	0.317593	1	unchanged
ENSMUSG00000001604	Tcea3	transcription elongation factor A (SII), 3	-1.29885	5.88692	-1.70705	0.0522079	0.441436	unchanged
ENSMUSG00000001627	Ifrd1	interferon-related developmental regulator 1	0.541947	5.09865	0	0.980588	1	unchanged
ENSMUSG00000001630	Stk38l	serine/threonine kinase 38 like	0.0535254	3.758	0	0.999363	1	unchanged
ENSMUSG00000001632	Brpf1	bromodomain and PHD finger containing, 1	0.707689	4.07134	0	0.933287	1	unchanged
ENSMUSG00000001642	Akr1b1	aldo-keto reductase family 1 member B	2.00289	0.0728899	1.5312	0.0713639	0.564861	unchanged
ENSMUSG00000001663	Gstt1	glutathione S-transferase, theta 1	-2.6055	6.99801	-10.6378	1.18124e-09	3.40453e-07	downreg
ENSMUSG00000001665	Gstt3	glutathione S-transferase, theta 3	-2.64744	5.56868	-6.13102	3.7005e-06	0.00027127	downreg
ENSMUSG00000001666	Ddt	D-dopachrome tautomerase	-1.43566	8.57923	-3.33897	0.00175945	0.0330086	downreg
ENSMUSG00000001670	Tat	tyrosine aminotransferase	-0.756935	7.52326	0	0.833587	1	unchanged
ENSMUSG00000001672	Marveld3	MARVEL (membrane-associating) domain containing 3	-0.232319	-0.270626	0	0.919493	1	unchanged
ENSMUSG00000001674	Ddx18	DEAD box helicase 18	-0.0207423	4.33373	0	0.99999	1	unchanged
ENSMUSG00000001687	Ubl3	ubiquitin-like 3	0.241116	6.21086	0	0.999999	1	unchanged
ENSMUSG00000001700	Gramd2b	GRAM domain containing 2B	-0.35728	5.11501	0	0.999534	1	unchanged
ENSMUSG00000001707	Eef1e1	eukaryotic translation elongation factor 1 epsilon 1	-0.14217	2.44458	0	0.996407	1	unchanged
ENSMUSG00000001729	Akt1	thymoma viral proto-oncogene 1	0.876515	6.52019	0	0.801578	1	unchanged
ENSMUSG00000001739	Cldn15	claudin 15	1.761	-0.603942	0.909182	0.189356	1	unchanged
ENSMUSG00000001741	Il16	interleukin 16	1.02264	2.99007	0.0613374	0.475886	1	unchanged
ENSMUSG00000001750	Tcirg1	T cell, immune regulator 1, ATPase, H+ transporting, lysosomal V0 protein A3	1.19734	5.61703	1.53903	0.0703006	0.558111	unchanged
ENSMUSG00000001751	Naglu	alpha-N-acetylglucosaminidase (Sanfilippo disease IIIB)	0.0928152	4.73341	0	0.999999	1	unchanged
ENSMUSG00000001755	Coasy	Coenzyme A synthase	-0.544952	6.78367	0	0.999631	1	unchanged
ENSMUSG00000001761	Smo	smoothened, frizzled class receptor	0.832323	0.646856	0	0.663556	1	unchanged
ENSMUSG00000001763	Tspan33	tetraspanin 33	-0.656757	2.92932	0	0.9309	1	unchanged
ENSMUSG00000001767	Crnkl1	crooked neck pre-mRNA splicing factor 1	-0.112715	3.48855	0	0.999947	1	unchanged
ENSMUSG00000001768	Rin2	Ras and Rab interactor 2	0.279829	3.49587	0	0.993731	1	unchanged
ENSMUSG00000001774	Chordc1	cysteine and histidine rich domain containing 1	-0.744139	6.13953	0	0.940105	1	unchanged
ENSMUSG00000001783	Rtcb	RNA 2',3'-cyclic phosphate and 5'-OH ligase	0.116857	5.73889	0	0.999999	1	unchanged
ENSMUSG00000001785	Pwp1	PWP1 homolog, endonuclein	-0.174094	4.20315	0	0.999954	1	unchanged
ENSMUSG00000001786	Fbxo7	F-box protein 7	-0.309887	4.78201	0	0.999955	1	unchanged
ENSMUSG00000001794	Capns1	calpain, small subunit 1	0.194441	7.21496	0	1	1	unchanged
ENSMUSG00000001802	Lrp3	low density lipoprotein receptor-related protein 3	-0.867468	2.3136	0	0.687144	1	unchanged
ENSMUSG00000001829	Clpb	ClpB caseinolytic peptidase B	-0.880066	4.89215	0	0.805292	1	unchanged
ENSMUSG00000001833	Septin7	septin 7	0.324346	6.23815	0	0.999987	1	unchanged
ENSMUSG00000001844	Zdhhc4	zinc finger, DHHC domain containing 4	-0.181936	4.793	0	0.999998	1	unchanged
ENSMUSG00000001847	Rac1	Rac family small GTPase 1	0.048057	7.39341	0	1	1	unchanged
ENSMUSG00000001855	Nup214	nucleoporin 214	0.476847	3.60257	0	0.988378	1	unchanged
ENSMUSG00000001870	Ltbp1	latent transforming growth factor beta binding protein 1	0.870816	1.32436	0	0.613663	1	unchanged
ENSMUSG00000001891	Ugp2	UDP-glucose pyrophosphorylase 2	-0.866802	6.93695	0	0.816234	1	unchanged
ENSMUSG00000001909	Trmt1	tRNA methyltransferase 1	0.172539	4.21307	0	0.999993	1	unchanged
ENSMUSG00000001910	Nacc1	nucleus accumbens associated 1, BEN and BTB (POZ) domain containing	0.303348	3.80934	0	0.998181	1	unchanged
ENSMUSG00000001911	Nfix	nuclear factor I/X	-0.783176	6.68658	0	0.960306	1	unchanged
ENSMUSG00000001918	Slc1a5	solute carrier family 1 (neutral amino acid transporter), member 5	1.50276	2.62723	1.28985	0.10644	0.755844	unchanged
ENSMUSG00000001924	Uba1	ubiquitin-like modifier activating enzyme 1	-0.245371	8.00616	0	1	1	unchanged
ENSMUSG00000001930	Vwf	Von Willebrand factor	1.44351	1.82162	1.58624	0.0647513	0.520918	unchanged
ENSMUSG00000001942	Siae	sialic acid acetylesterase	-0.297702	5.07289	0	0.999951	1	unchanged
ENSMUSG00000001946	Esam	endothelial cell-specific adhesion molecule	0.939152	4.66808	0	0.603324	1	unchanged
ENSMUSG00000001948	Spa17	sperm autoantigenic protein 17	0.549769	1.08139	0	0.809677	1	unchanged
ENSMUSG00000001962	Fam50a	family with sequence similarity 50, member A	-0.178332	3.91753	0	0.999669	1	unchanged
ENSMUSG00000001964	Emd	emerin	-0.0472546	4.4125	0	0.999999	1	unchanged
ENSMUSG00000001983	Taco1	translational activator of mitochondrially encoded cytochrome c oxidase I	-0.622339	1.87207	0	0.907149	1	unchanged
ENSMUSG00000001986	Gria3	glutamate receptor, ionotropic, AMPA3 (alpha 3)	-0.792029	-0.346476	0	0.633507	1	unchanged
ENSMUSG00000001995	Sipa1l2	signal-induced proliferation-associated 1 like 2	-0.183347	2.03866	0	0.979717	1	unchanged
ENSMUSG00000001998	Ap4e1	adaptor-related protein complex AP-4, epsilon 1	-0.0887092	1.27204	0	0.992655	1	unchanged
ENSMUSG00000001999	Blvra	biliverdin reductase A	0.790321	4.65207	0	0.900069	1	unchanged
ENSMUSG00000002010	Idh3g	isocitrate dehydrogenase 3 (NAD+), gamma	-0.153599	5.66928	0	1	1	unchanged
ENSMUSG00000002014	Ssr4	signal sequence receptor, delta	0.199292	7.85198	0	1	1	unchanged
ENSMUSG00000002015	Bcap31	B cell receptor associated protein 31	-0.665589	6.62812	0	0.992369	1	unchanged
ENSMUSG00000002017	Fam98a	family with sequence similarity 98, member A	0.144584	3.69909	0	0.999942	1	unchanged
ENSMUSG00000002028	Kmt2a	lysine (K)-specific methyltransferase 2A	0.222416	5.11595	0	0.999944	1	unchanged
ENSMUSG00000002031	Ift46	intraflagellar transport 46	-0.104135	3.64288	0	0.999985	1	unchanged
ENSMUSG00000002032	Tmem25	transmembrane protein 25	-1.35692	4.15964	-1.91279	0.0356321	0.330126	unchanged
ENSMUSG00000002033	Cd3g	CD3 antigen, gamma polypeptide	1.25713	0.652279	0.405207	0.346047	1	unchanged
ENSMUSG00000002043	Trappc6a	trafficking protein particle complex 6A	-0.0826975	4.01185	0	0.99999	1	unchanged
ENSMUSG00000002052	Supt6	SPT6, histone chaperone and transcription elongation factor	0.0099435	5.11746	0	0.999995	1	unchanged
ENSMUSG00000002055	Spag5	sperm associated antigen 5	2.39185	1.2937	1.92906	0.0346269	0.324536	unchanged
ENSMUSG00000002058	Unc119	unc-119 lipid binding chaperone	0.655754	3.39822	0	0.947143	1	unchanged
ENSMUSG00000002059	Rab34	RAB34, member RAS oncogene family	-0.870368	2.32309	0	0.693936	1	unchanged
ENSMUSG00000002064	Sdf2	stromal cell derived factor 2	-0.103015	5.33127	0	0.999993	1	unchanged
ENSMUSG00000002068	Ccne1	cyclin E1	2.0186	2.00987	1.704	0.0525347	0.443069	unchanged
ENSMUSG00000002076	Hsf2bp	heat shock transcription factor 2 binding protein	1.63496	-0.502294	0.832513	0.209186	1	unchanged
ENSMUSG00000002083	Bbc3	BCL2 binding component 3	-0.74425	3.54374	0	0.749101	1	unchanged
ENSMUSG00000002102	Psmc3	proteasome (prosome, macropain) 26S subunit, ATPase 3	0.137097	7.26666	0	1	1	unchanged
ENSMUSG00000002103	Acp2	acid phosphatase 2, lysosomal	0.755703	6.37026	0	0.949044	1	unchanged
ENSMUSG00000002105	Slc39a13	solute carrier family 39 (metal ion transporter), member 13	0.702012	3.26352	0	0.879029	1	unchanged
ENSMUSG00000002107	Celf2	CUGBP, Elav-like family member 2	0.91832	6.29037	0	0.715627	1	unchanged
ENSMUSG00000002108	Nr1h3	nuclear receptor subfamily 1, group H, member 3	0.339766	6.91095	0	0.999986	1	unchanged
ENSMUSG00000002109	Ddb2	damage specific DNA binding protein 2	-0.269866	1.11273	0	0.990469	1	unchanged
ENSMUSG00000002111	Spi1	Spi-1 proto-oncogene	3.38031	4.71439	7.11199	5.12969e-07	5.57455e-05	upreg
ENSMUSG00000002129	Sf3a1	splicing factor 3a, subunit 1	0.267492	4.6418	0	0.999981	1	unchanged
ENSMUSG00000002147	Stat6	signal transducer and activator of transcription 6	0.303183	4.98946	0	0.999991	1	unchanged
ENSMUSG00000002204	Napsa	napsin A aspartic peptidase	3.46694	2.33363	3.56882	0.00105117	0.0225508	upreg
ENSMUSG00000002205	Vrk3	vaccinia related kinase 3	0.223178	4.71625	0	0.999754	1	unchanged
ENSMUSG00000002210	Smg9	SMG9 nonsense mediated mRNA decay factor	-0.0041348	2.1584	0	0.999796	1	unchanged
ENSMUSG00000002221	Paxip1	PAX interacting (with transcription-activation domain) protein 1	-0.121895	3.03773	0	0.999517	1	unchanged
ENSMUSG00000002222	Rmnd5a	required for meiotic nuclear division 5 homolog A	-0.678838	5.49877	0	0.973625	1	unchanged
ENSMUSG00000002227	Mov10	Mov10 RISC complex RNA helicase	0.506149	3.70302	0	0.972326	1	unchanged
ENSMUSG00000002228	Ppm1j	protein phosphatase 1J	1.74824	-0.850625	0.632858	0.283042	1	unchanged
ENSMUSG00000002233	Rhoc	ras homolog family member C	1.07047	5.32894	0.293043	0.386363	1	unchanged
ENSMUSG00000002249	Tead3	TEA domain family member 3	-0.136245	1.70064	0	0.997466	1	unchanged
ENSMUSG00000002250	Ppard	peroxisome proliferator activator receptor delta	-0.675432	3.02605	0	0.807487	1	unchanged
ENSMUSG00000002257	Def6	differentially expressed in FDCP 6	3.73346	0.577901	2.5915	0.00917477	0.117085	unchanged
ENSMUSG00000002265	Peg3	paternally expressed 3	0.520447	2.20395	0	0.947393	1	unchanged
ENSMUSG00000002274	Metrn	meteorin, glial cell differentiation regulator	-0.259223	0.937982	0	0.977895	1	unchanged
ENSMUSG00000002279	Lmf1	lipase maturation factor 1	-0.512662	4.99833	0	0.996107	1	unchanged
ENSMUSG00000002280	Ciao3	cytosolic iron-sulfur assembly component 3	-0.595644	3.76059	0	0.987928	1	unchanged
ENSMUSG00000002289	Angptl4	angiopoietin-like 4	-0.352478	5.10183	0	0.944167	1	unchanged
ENSMUSG00000002297	Dbf4	DBF4 zinc finger	0.523831	2.24695	0	0.92066	1	unchanged
ENSMUSG00000002307	Daxx	Fas death domain-associated protein	0.717271	4.73693	0	0.910947	1	unchanged
ENSMUSG00000002308	Cd320	CD320 antigen	0.584214	2.05517	0	0.904955	1	unchanged
ENSMUSG00000002319	Ipo4	importin 4	-0.198596	3.91833	0	0.999967	1	unchanged
ENSMUSG00000002320	Tm9sf1	transmembrane 9 superfamily member 1	-0.109986	1.04642	0	0.979469	1	unchanged
ENSMUSG00000002324	Rec8	REC8 meiotic recombination protein	-0.0352546	-0.825793	0	0.984087	1	unchanged
ENSMUSG00000002325	Irf9	interferon regulatory factor 9	0.369195	5.71091	0	0.999957	1	unchanged
ENSMUSG00000002326	Gmpr2	guanosine monophosphate reductase 2	0.124226	3.24582	0	0.999514	1	unchanged
ENSMUSG00000002329	Mdp1	magnesium-dependent phosphatase 1	-0.408993	4.59258	0	0.999319	1	unchanged
ENSMUSG00000002332	Dhrs1	dehydrogenase/reductase 1	-0.576337	7.82911	0	0.999447	1	unchanged
ENSMUSG00000002342	Tmem161a	transmembrane protein 161A	0.0337043	3.80731	0	0.999997	1	unchanged
ENSMUSG00000002343	Armc6	armadillo repeat containing 6	-0.533166	1.82072	0	0.902106	1	unchanged
ENSMUSG00000002345	Borcs8	BLOC-1 related complex subunit 8	-0.186885	3.98816	0	0.999709	1	unchanged
ENSMUSG00000002346	Slc25a42	solute carrier family 25, member 42	-1.37781	3.93775	-2.037	0.0280526	0.276727	unchanged
ENSMUSG00000002365	Snx9	sorting nexin 9	-0.766105	0.145405	0	0.647029	1	unchanged
ENSMUSG00000002372	Ranbp3	RAN binding protein 3	-0.0213586	4.22259	0	0.999999	1	unchanged
ENSMUSG00000002379	Ndufa11	NADH:ubiquinone oxidoreductase subunit A11	-0.496861	6.86099	0	0.999922	1	unchanged
ENSMUSG00000002393	Nr2f6	nuclear receptor subfamily 2, group F, member 6	-0.355249	5.90502	0	0.999981	1	unchanged
ENSMUSG00000002395	Use1	unconventional SNARE in the ER 1 homolog (S. cerevisiae)	-0.121877	6.54647	0	1	1	unchanged
ENSMUSG00000002396	Ocel1	occludin/ELL domain containing 1	-0.155937	3.06547	0	0.999701	1	unchanged
ENSMUSG00000002409	Dyrk1b	dual-specificity tyrosine phosphorylation regulated kinase 1b	-0.517145	0.295355	0	0.852285	1	unchanged
ENSMUSG00000002413	Braf	Braf transforming gene	0.546025	4.16498	0	0.973936	1	unchanged
ENSMUSG00000002416	Ndufb2	NADH:ubiquinone oxidoreductase subunit B2	-0.677383	6.82937	0	0.989793	1	unchanged
ENSMUSG00000002428	Hltf	helicase-like transcription factor	0.571479	3.07823	0	0.933008	1	unchanged
ENSMUSG00000002455	Prpf6	pre-mRNA splicing factor 6	-0.561297	5.52199	0	0.997611	1	unchanged
ENSMUSG00000002458	Rgs19	regulator of G-protein signaling 19	2.65173	2.79218	3.56703	0.00105365	0.0225675	upreg
ENSMUSG00000002475	Abhd3	abhydrolase domain containing 3	-0.768932	4.49509	0	0.911033	1	unchanged
ENSMUSG00000002477	Snrpd1	small nuclear ribonucleoprotein D1	0.3071	5.49368	0	0.999947	1	unchanged
ENSMUSG00000002486	Tchp	trichoplein, keratin filament binding	0.723152	1.58012	0	0.756445	1	unchanged
ENSMUSG00000002489	Tiam1	T cell lymphoma invasion and metastasis 1	-0.402162	0.37636	0	0.845602	1	unchanged
ENSMUSG00000002496	Tsc2	TSC complex subunit 2	-0.621204	3.47396	0	0.956144	1	unchanged
ENSMUSG00000002504	Nherf2	NHERF family PDZ scaffold protein 2	-0.805607	4.15645	0	0.873388	1	unchanged
ENSMUSG00000002524	Puf60	poly-U binding splicing factor 60	0.112019	6.38006	0	1	1	unchanged
ENSMUSG00000002546	Golga2	golgin A2	-0.188063	5.24196	0	0.999999	1	unchanged
ENSMUSG00000002550	Uck1	uridine-cytidine kinase 1	-0.9662	4.46967	0	0.572577	1	unchanged
ENSMUSG00000002578	Ikzf4	IKAROS family zinc finger 4	-0.901479	0.893879	0	0.561787	1	unchanged
ENSMUSG00000002580	Mien1	migration and invasion enhancer 1	-0.552378	6.15135	0	0.999103	1	unchanged
ENSMUSG00000002588	Pon1	paraoxonase 1	-0.179534	9.12084	0	0.999993	1	unchanged
ENSMUSG00000002602	Axl	AXL receptor tyrosine kinase	2.40563	6.0694	8.29198	5.65154e-08	9.73093e-06	upreg
ENSMUSG00000002603	Tgfb1	transforming growth factor, beta 1	1.8414	2.60922	1.87317	0.0384093	0.348403	unchanged
ENSMUSG00000002608	Ccdc97	coiled-coil domain containing 97	-0.00128606	4.69387	0	1	1	unchanged
ENSMUSG00000002617	Zfp40	zinc finger protein 40	0.564165	0.568351	0	0.849625	1	unchanged
ENSMUSG00000002625	Akap8l	A kinase anchor protein 8-like	-0.166175	3.55761	0	0.998961	1	unchanged
ENSMUSG00000002635	Pdcd2l	programmed cell death 2-like	-0.0392802	3.32737	0	0.999993	1	unchanged
ENSMUSG00000002658	Gtf2f1	general transcription factor IIF, polypeptide 1	0.207586	4.51358	0	0.999988	1	unchanged
ENSMUSG00000002660	Clpp	caseinolytic mitochondrial matrix peptidase proteolytic subunit	-0.318787	5.68186	0	0.999998	1	unchanged
ENSMUSG00000002661	Alkbh7	alkB homolog 7	-0.895018	3.74877	0	0.716271	1	unchanged
ENSMUSG00000002668	Dennd1c	DENN domain containing 1C	2.85146	2.00241	3.91806	0.000476377	0.0122399	upreg
ENSMUSG00000002679	Med6	mediator complex subunit 6	0.195305	2.91315	0	0.999301	1	unchanged
ENSMUSG00000002699	Lcp2	lymphocyte cytosolic protein 2	3.31884	4.04966	5.24117	2.47199e-05	0.00119612	upreg
ENSMUSG00000002718	Cse1l	chromosome segregation 1 like	-0.291335	4.32901	0	0.999976	1	unchanged
ENSMUSG00000002728	Naa20	N(alpha)-acetyltransferase 20, NatB catalytic subunit	0.474113	1.86274	0	0.912772	1	unchanged
ENSMUSG00000002731	Prkra	protein kinase, interferon inducible double stranded RNA dependent activator	-0.441592	4.16165	0	0.997604	1	unchanged
ENSMUSG00000002732	Fkbp7	FK506 binding protein 7	1.01473	1.90548	0.0330541	0.487114	1	unchanged
ENSMUSG00000002733	Plekha3	pleckstrin homology domain-containing, family A (phosphoinositide binding specific) member 3	0.241667	4.28429	0	0.999882	1	unchanged
ENSMUSG00000002741	Ykt6	YKT6 v-SNARE homolog (S. cerevisiae)	-0.154688	5.87387	0	1	1	unchanged
ENSMUSG00000002748	Baz1b	bromodomain adjacent to zinc finger domain, 1B	0.502967	6.03634	0	0.994665	1	unchanged
ENSMUSG00000002763	Pex6	peroxisomal biogenesis factor 6	-0.834998	4.48499	0	0.919654	1	unchanged
ENSMUSG00000002767	Mrpl2	mitochondrial ribosomal protein L2	-0.504937	5.42639	0	0.999499	1	unchanged
ENSMUSG00000002768	Mea1	male enhanced antigen 1	-0.238481	4.85279	0	0.999975	1	unchanged
ENSMUSG00000002769	Gnmt	glycine N-methyltransferase	-0.595007	10.3192	0	0.976905	1	unchanged
ENSMUSG00000002778	Kdelr1	KDEL (Lys-Asp-Glu-Leu) endoplasmic reticulum protein retention receptor 1	0.0928869	7.59111	0	1	1	unchanged
ENSMUSG00000002781	Tmem143	transmembrane protein 143	-0.514638	3.11124	0	0.979056	1	unchanged
ENSMUSG00000002797	Ggct	gamma-glutamyl cyclotransferase	0.194927	4.23066	0	0.999917	1	unchanged
ENSMUSG00000002803	Btbd6	BTB domain containing 6	-0.27225	2.90878	0	0.998425	1	unchanged
ENSMUSG00000002804	Nudt14	nudix hydrolase 14	0.0667221	3.83068	0	0.99999	1	unchanged
ENSMUSG00000002808	Epdr1	ependymin related 1	0.965672	-0.667334	0	0.530556	1	unchanged
ENSMUSG00000002812	Flii	flightless I actin binding protein	-0.0429239	4.90103	0	0.999999	1	unchanged
ENSMUSG00000002814	Top3a	topoisomerase (DNA) III alpha	0.52313	1.15323	0	0.852438	1	unchanged
ENSMUSG00000002820	Atg4d	autophagy related 4D, cysteine peptidase	-0.166895	3.65183	0	0.999936	1	unchanged
ENSMUSG00000002825	Qtrt1	queuine tRNA-ribosyltransferase catalytic subunit 1	0.0279824	2.00118	0	0.99782	1	unchanged
ENSMUSG00000002831	Plin4	perilipin 4	-0.162057	1.79336	0	0.985706	1	unchanged
ENSMUSG00000002833	Hdgfl2	HDGF like 2	-0.0315242	4.79501	0	0.999997	1	unchanged
ENSMUSG00000002835	Chaf1a	chromatin assembly factor 1, subunit A	1.55733	1.95922	0.974331	0.171321	1	unchanged
ENSMUSG00000002844	Adprh	ADP-ribosylarginine hydrolase	0.765506	3.93074	0	0.81097	1	unchanged
ENSMUSG00000002845	Tmem39a	transmembrane protein 39a	-0.117027	3.17115	0	0.998462	1	unchanged
ENSMUSG00000002846	Timmdc1	translocase of inner mitochondrial membrane domain containing 1	-0.633174	5.18003	0	0.996199	1	unchanged
ENSMUSG00000002847	Pla1a	phospholipase A1 member A	0.0561795	6.0076	0	1	1	unchanged
ENSMUSG00000002870	Mcm2	minichromosome maintenance complex component 2	2.19791	2.89039	3.71643	0.000751778	0.0174861	upreg
ENSMUSG00000002871	Tpra1	transmembrane protein, adipocyte asscociated 1	0.0727524	4.38082	0	0.999957	1	unchanged
ENSMUSG00000002881	Nab1	Ngfi-A binding protein 1	0.127442	6.01133	0	1	1	unchanged
ENSMUSG00000002885	Adgre5	adhesion G protein-coupled receptor E5	1.61617	5.41829	3.03553	0.00345543	0.0557324	unchanged
ENSMUSG00000002897	Il17ra	interleukin 17 receptor A	1.48258	5.04873	2.5562	0.00974473	0.12281	unchanged
ENSMUSG00000002900	Lamb1	laminin B1	0.0572141	3.47694	0	0.999969	1	unchanged
ENSMUSG00000002908	Kcnn1	potassium intermediate/small conductance calcium-activated channel, subfamily N, member 1	-0.119951	0.460045	0	0.971757	1	unchanged
ENSMUSG00000002910	Arrdc2	arrestin domain containing 2	0.273848	1.97501	0	0.956357	1	unchanged
ENSMUSG00000002944	Cd36	CD36 molecule	0.812251	5.1136	0	0.767588	1	unchanged
ENSMUSG00000002948	Map2k7	mitogen-activated protein kinase kinase 7	-0.259373	4.16981	0	0.999933	1	unchanged
ENSMUSG00000002949	Timm44	translocase of inner mitochondrial membrane 44	-0.594452	4.4779	0	0.983046	1	unchanged
ENSMUSG00000002957	Ap2a2	adaptor-related protein complex 2, alpha 2 subunit	-0.0562029	5.84732	0	1	1	unchanged
ENSMUSG00000002963	Pnkp	polynucleotide kinase 3'- phosphatase	-0.346519	4.08606	0	0.999562	1	unchanged
ENSMUSG00000002968	Med25	mediator complex subunit 25	-0.42322	4.27473	0	0.999609	1	unchanged
ENSMUSG00000002980	Bcam	basal cell adhesion molecule	-0.0339179	0.332881	0	0.991705	1	unchanged
ENSMUSG00000002981	Clptm1	cleft lip and palate associated transmembrane protein 1	-0.269499	5.57342	0	0.999999	1	unchanged
ENSMUSG00000002983	Relb	avian reticuloendotheliosis viral (v-rel) oncogene related B	1.98399	2.84526	1.76886	0.0466581	0.405656	unchanged
ENSMUSG00000002984	Tomm40	translocase of outer mitochondrial membrane 40	-0.251213	5.07394	0	0.999717	1	unchanged
ENSMUSG00000002985	Apoe	apolipoprotein E	-0.752692	14.0403	0	0.987348	1	unchanged
ENSMUSG00000002992	Apoc2	apolipoprotein C2	-0.52885	2.70948	0	0.924412	1	unchanged
ENSMUSG00000002996	Hbp1	high mobility group box transcription factor 1	-0.17133	5.91687	0	0.999986	1	unchanged
ENSMUSG00000002997	Prkar2b	protein kinase, cAMP dependent regulatory, type II beta	2.37041	1.23921	2.28982	0.016952	0.188508	unchanged
ENSMUSG00000003031	Cdkn1b	cyclin dependent kinase inhibitor 1B	0.119889	4.67581	0	0.999994	1	unchanged
ENSMUSG00000003032	Klf4	Kruppel-like transcription factor 4 (gut)	1.61101	1.73229	1.16561	0.12928	0.876433	unchanged
ENSMUSG00000003033	Ap1m1	adaptor-related protein complex AP-1, mu subunit 1	0.0621809	4.43719	0	1	1	unchanged
ENSMUSG00000003037	Rab8a	RAB8A, member RAS oncogene family	0.178328	6.53392	0	1	1	unchanged
ENSMUSG00000003038	Hmgn2	high mobility group nucleosomal binding domain 2	1.23562	1.2132	0.483411	0.317322	1	unchanged
ENSMUSG00000003039	Fam32a	family with sequence similarity 32, member A	-0.322303	5.84403	0	0.999758	1	unchanged
ENSMUSG00000003051	Elf3	E74-like factor 3	3.22896	0.964124	2.28195	0.0174031	0.192435	unchanged
ENSMUSG00000003053	Cyp2c29	cytochrome P450, family 2, subfamily c, polypeptide 29	-1.84649	9.21399	-4.80777	6.4293e-05	0.00258949	downreg
ENSMUSG00000003062	Stard3nl	STARD3 N-terminal like	0.993016	2.92713	0	0.512298	1	unchanged
ENSMUSG00000003068	Stk11	serine/threonine kinase 11	-0.322767	6.27471	0	0.999996	1	unchanged
ENSMUSG00000003072	Atp5f1d	ATP synthase F1 subunit delta	-0.610833	7.96899	0	0.999517	1	unchanged
ENSMUSG00000003099	Ppp5c	protein phosphatase 5, catalytic subunit	-0.0964889	4.77356	0	0.999997	1	unchanged
ENSMUSG00000003119	Cdk12	cyclin dependent kinase 12	0.427134	4.57745	0	0.995617	1	unchanged
ENSMUSG00000003123	Lipe	lipase, hormone sensitive	0.276186	4.38695	0	0.999907	1	unchanged
ENSMUSG00000003131	Pafah1b2	platelet-activating factor acetylhydrolase, isoform 1b, subunit 2	0.206537	5.0218	0	0.999993	1	unchanged
ENSMUSG00000003134	Tbc1d8	TBC1 domain family, member 8	-0.321031	3.02177	0	0.99149	1	unchanged
ENSMUSG00000003135	Cnot11	CCR4-NOT transcription complex, subunit 11	-0.0812079	3.14358	0	0.999847	1	unchanged
ENSMUSG00000003153	Slc2a3	solute carrier family 2 (facilitated glucose transporter), member 3	3.19279	0.665589	2.85639	0.00513207	0.0752965	unchanged
ENSMUSG00000003154	Foxj2	forkhead box J2	0.192323	2.47673	0	0.98196	1	unchanged
ENSMUSG00000003161	Sri	sorcin	0.376264	5.88428	0	0.999993	1	unchanged
ENSMUSG00000003166	Dgcr2	DiGeorge syndrome critical region gene 2	-0.201864	4.92992	0	0.999992	1	unchanged
ENSMUSG00000003184	Irf3	interferon regulatory factor 3	-0.27317	5.50809	0	0.999997	1	unchanged
ENSMUSG00000003190	Bcl2l12	BCL2 like 12	-0.291919	1.89448	0	0.989796	1	unchanged
ENSMUSG00000003198	Zfp959	zinc finger protein 959	-0.476626	1.51197	0	0.931027	1	unchanged
ENSMUSG00000003199	Mpnd	MPN domain containing	-0.331853	5.91291	0	0.999926	1	unchanged
ENSMUSG00000003200	Sh3gl1	SH3-domain GRB2-like 1	-0.348846	4.19016	0	0.991897	1	unchanged
ENSMUSG00000003206	Ebi3	Epstein-Barr virus induced gene 3	2.47274	2.72734	3.23861	0.0022022	0.0386201	upreg
ENSMUSG00000003208	Yju2	YJU2 splicing factor	-0.693136	0.61753	0	0.739229	1	unchanged
ENSMUSG00000003226	Ranbp2	RAN binding protein 2	0.385077	4.29227	0	0.998945	1	unchanged
ENSMUSG00000003228	Grk5	G protein-coupled receptor kinase 5	-0.551459	1.81346	0	0.921866	1	unchanged
ENSMUSG00000003233	Dvl3	dishevelled segment polarity protein 3	-1.36421	0.658506	-0.819205	0.211531	1	unchanged
ENSMUSG00000003234	Abcf3	ATP-binding cassette, sub-family F member 3	-0.106862	4.28213	0	0.999995	1	unchanged
ENSMUSG00000003235	Eif2b5	eukaryotic translation initiation factor 2B, subunit 5 epsilon	-0.12677	4.60513	0	0.999999	1	unchanged
ENSMUSG00000003269	Cyth2	cytohesin 2	0.0807869	3.63945	0	0.999901	1	unchanged
ENSMUSG00000003279	Dlgap1	DLG associated protein 1	-0.248995	-0.366399	0	0.910558	1	unchanged
ENSMUSG00000003283	Hck	hemopoietic cell kinase	3.24321	5.23565	7.84781	1.26855e-07	1.79196e-05	upreg
ENSMUSG00000003299	Mrpl4	mitochondrial ribosomal protein L4	-0.253706	4.96261	0	0.999961	1	unchanged
ENSMUSG00000003308	Keap1	kelch-like ECH-associated protein 1	0.204441	6.31784	0	0.999995	1	unchanged
ENSMUSG00000003316	Glg1	golgi apparatus protein 1	0.423807	5.11656	0	0.997499	1	unchanged
ENSMUSG00000003344	Btbd2	BTB domain containing 2	-0.457207	3.26764	0	0.9972	1	unchanged
ENSMUSG00000003345	Csnk1g2	casein kinase 1, gamma 2	0.0640257	5.78442	0	0.999998	1	unchanged
ENSMUSG00000003346	Abhd17a	abhydrolase domain containing 17A	-0.281056	5.30945	0	0.999981	1	unchanged
ENSMUSG00000003348	Mob3a	MOB kinase activator 3A	1.31573	2.07741	0.822003	0.210737	1	unchanged
ENSMUSG00000003355	Fkbp11	FK506 binding protein 11	1.04334	5.33784	0.18194	0.428797	1	unchanged
ENSMUSG00000003360	Ddx23	DEAD box helicase 23	-0.149944	3.06815	0	0.999257	1	unchanged
ENSMUSG00000003363	Pld3	phospholipase D family member 3	0.803333	4.51948	0	0.816106	1	unchanged
ENSMUSG00000003380	Rabac1	Rab acceptor 1 (prenylated)	-0.232658	5.98879	0	0.999977	1	unchanged
ENSMUSG00000003382	Etv3	ets variant 3	0.269046	2.53389	0	0.988677	1	unchanged
ENSMUSG00000003402	Prkcsh	protein kinase C substrate 80K-H	0.0744617	6.69047	0	1	1	unchanged
ENSMUSG00000003418	St8sia6	ST8 alpha-N-acetyl-neuraminide alpha-2,8-sialyltransferase 6	3.1713	-1.28584	2.16936	0.0218734	0.226149	unchanged
ENSMUSG00000003420	Fcgrt	Fc fragment of IgG receptor and transporter	-0.246519	6.45242	0	0.999999	1	unchanged
ENSMUSG00000003421	Nosip	nitric oxide synthase interacting protein	0.146539	4.34713	0	0.999999	1	unchanged
ENSMUSG00000003423	Pih1d1	PIH1 domain containing 1	-0.307586	4.3248	0	0.999965	1	unchanged
ENSMUSG00000003429	Rps11	ribosomal protein S11	0.259179	6.06192	0	0.999924	1	unchanged
ENSMUSG00000003435	Supt5	suppressor of Ty 5, DSIF elongation factor subunit	0.184268	5.65822	0	0.999994	1	unchanged
ENSMUSG00000003437	Paf1	Paf1, RNA polymerase II complex component	0.160774	3.99749	0	0.999981	1	unchanged
ENSMUSG00000003438	Timm50	translocase of inner mitochondrial membrane 50	-0.52134	4.40496	0	0.999337	1	unchanged
ENSMUSG00000003444	Med29	mediator complex subunit 29	-0.212107	2.12637	0	0.992212	1	unchanged
ENSMUSG00000003452	Bicd1	BICD cargo adaptor 1	1.92567	-0.512301	0.992281	0.169649	1	unchanged
ENSMUSG00000003458	Ncstn	nicastrin	-0.0421763	3.37569	0	0.999849	1	unchanged
ENSMUSG00000003464	Pex19	peroxisomal biogenesis factor 19	-0.471722	6.07837	0	0.999724	1	unchanged
ENSMUSG00000003477	Inmt	indolethylamine N-methyltransferase	-5.02023	7.92337	-12.9366	4.67246e-11	2.69337e-08	downreg
ENSMUSG00000003484	Cyp4f18	cytochrome P450, family 4, subfamily f, polypeptide 18	4.0259	2.00561	4.19164	0.000257134	0.00781899	upreg
ENSMUSG00000003500	Impdh1	inosine monophosphate dehydrogenase 1	1.61344	2.7333	1.52741	0.0717263	0.566714	unchanged
ENSMUSG00000003518	Dusp3	dual specificity phosphatase 3 (vaccinia virus phosphatase VH1-related)	0.221793	5.41654	0	0.999979	1	unchanged
ENSMUSG00000003526	Prodh	proline dehydrogenase	-0.681452	5.73794	0	0.973509	1	unchanged
ENSMUSG00000003527	Ess2	ess-2 splicing factor	-0.0651679	2.0237	0	0.999702	1	unchanged
ENSMUSG00000003528	Slc25a1	solute carrier family 25 (mitochondrial carrier, citrate transporter), member 1	-0.828914	6.70371	0	0.884982	1	unchanged
ENSMUSG00000003531	Dgcr6	DiGeorge syndrome critical region gene 6	-1.039	4.27495	-0.192346	0.424775	1	unchanged
ENSMUSG00000003534	Ddr1	discoidin domain receptor family, member 1	1.56263	1.69076	1.28124	0.107917	0.763888	unchanged
ENSMUSG00000003541	Ier3	immediate early response 3	1.5948	3.45243	1.50781	0.0741845	0.581206	unchanged
ENSMUSG00000003545	Fosb	FBJ osteosarcoma oncogene B	1.17248	-0.640327	0.206538	0.428159	1	unchanged
ENSMUSG00000003546	Klc4	kinesin light chain 4	-0.673151	5.71162	0	0.974755	1	unchanged
ENSMUSG00000003549	Ercc1	excision repair cross-complementing rodent repair deficiency, complementation group 1	0.870888	2.2	0	0.661073	1	unchanged
ENSMUSG00000003555	Cyp17a1	cytochrome P450, family 17, subfamily a, polypeptide 1	2.16871	4.97875	1.94739	0.033379	0.315873	unchanged
ENSMUSG00000003559	As3mt	arsenite methyltransferase	0.440242	4.91414	0	0.99789	1	unchanged
ENSMUSG00000003573	Homer3	homer scaffolding protein 3	-0.207338	1.41203	0	0.961066	1	unchanged
ENSMUSG00000003575	Crtc1	CREB regulated transcription coactivator 1	0.112856	1.90549	0	0.992821	1	unchanged
ENSMUSG00000003581	Rnf215	ring finger protein 215	-0.116119	3.66375	0	0.999975	1	unchanged
ENSMUSG00000003585	Sec14l2	SEC14-like lipid binding 2	-1.1247	8.25214	-0.870073	0.197664	1	unchanged
ENSMUSG00000003604	Aven	apoptosis, caspase activation inhibitor	-0.473569	3.83074	0	0.996985	1	unchanged
ENSMUSG00000003617	Cp	ceruloplasmin	1.97958	11.5084	10.3074	1.96066e-09	5.30499e-07	upreg
ENSMUSG00000003623	Crot	carnitine O-octanoyltransferase	-0.621387	7.9882	0	0.94697	1	unchanged
ENSMUSG00000003644	Rps6ka1	ribosomal protein S6 kinase polypeptide 1	0.647142	3.68956	0	0.893502	1	unchanged
ENSMUSG00000003660	Snrnp200	small nuclear ribonucleoprotein 200 (U5)	0.09243	5.56295	0	1	1	unchanged
ENSMUSG00000003662	Ciao1	cytosolic iron-sulfur protein assembly 1	-0.190964	4.39865	0	0.999958	1	unchanged
ENSMUSG00000003680	Taf6l	TATA-box binding protein associated factor 6 like	0.202318	5.57399	0	0.999997	1	unchanged
ENSMUSG00000003721	Insig2	insulin induced gene 2	-2.02297	7.24735	-4.29543	0.000202855	0.00651198	downreg
ENSMUSG00000003731	Kpna6	karyopherin subunit alpha 6	-0.245592	4.03706	0	0.999947	1	unchanged
ENSMUSG00000003746	Man1a	mannosidase 1, alpha	-0.27834	6.10314	0	0.999967	1	unchanged
ENSMUSG00000003752	Itpkc	inositol 1,4,5-trisphosphate 3-kinase C	0.158092	1.11438	0	0.982097	1	unchanged
ENSMUSG00000003762	Coq8b	coenzyme Q8B	0.228898	3.87245	0	0.995294	1	unchanged
ENSMUSG00000003778	Brd8	bromodomain containing 8	0.300537	4.86052	0	0.999918	1	unchanged
ENSMUSG00000003779	Kif20a	kinesin family member 20A	1.71227	0.892052	1.00652	0.164104	1	unchanged
ENSMUSG00000003808	Farsa	phenylalanyl-tRNA synthetase, alpha subunit	0.0321995	6	0	0.999996	1	unchanged
ENSMUSG00000003809	Gcdh	glutaryl-Coenzyme A dehydrogenase	-0.905967	7.42096	0	0.772571	1	unchanged
ENSMUSG00000003810	Mast2	microtubule associated serine/threonine kinase 2	0.168037	3.06114	0	0.998116	1	unchanged
ENSMUSG00000003812	Dnase2a	deoxyribonuclease II alpha	-0.0428789	5.13612	0	0.999998	1	unchanged
ENSMUSG00000003813	Rad23a	RAD23 homolog A, nucleotide excision repair protein	-0.242784	4.20823	0	0.999939	1	unchanged
ENSMUSG00000003814	Calr	calreticulin	0.27354	9.81817	0	0.999982	1	unchanged
ENSMUSG00000003824	Syce2	synaptonemal complex central element protein 2	0.0455736	1.02567	0	0.98746	1	unchanged
ENSMUSG00000003847	Nfat5	nuclear factor of activated T cells 5	-0.204498	3.82152	0	0.999985	1	unchanged
ENSMUSG00000003848	Nob1	NIN1/RPN12 binding protein 1 homolog	0.604829	2.53973	0	0.943816	1	unchanged
ENSMUSG00000003849	Nqo1	NAD(P)H dehydrogenase, quinone 1	0.903714	3.35659	0	0.579529	1	unchanged
ENSMUSG00000003865	Gys1	glycogen synthase 1, muscle	0.656704	2.2689	0	0.843296	1	unchanged
ENSMUSG00000003868	Ruvbl2	RuvB-like AAA ATPase 2	-0.135623	2.08456	0	0.996231	1	unchanged
ENSMUSG00000003873	Bax	BCL2-associated X protein	0.576116	2.38501	0	0.862781	1	unchanged
ENSMUSG00000003882	Il7r	interleukin 7 receptor	2.67022	0.271446	1.9585	0.0328523	0.312226	unchanged
ENSMUSG00000003923	Tfam	transcription factor A, mitochondrial	-0.352595	5.03129	0	0.999977	1	unchanged
ENSMUSG00000003929	Zfp81	zinc finger protein 81	-0.450732	1.16723	0	0.91625	1	unchanged
ENSMUSG00000003948	Mmd	monocyte to macrophage differentiation-associated	-0.803635	6.24199	0	0.885344	1	unchanged
ENSMUSG00000003949	Hlf	hepatic leukemia factor	0.0261821	4.75683	0	0.999997	1	unchanged
ENSMUSG00000003955	Fam162a	family with sequence similarity 162, member A	-0.472361	6.38838	0	0.999958	1	unchanged
ENSMUSG00000003970	Rpl8	ribosomal protein L8	0.103372	8.42622	0	1	1	unchanged
ENSMUSG00000003992	Ssbp2	single-stranded DNA binding protein 2	0.55024	0.745583	0	0.836097	1	unchanged
ENSMUSG00000004018	Fancl	Fanconi anemia, complementation group L	0.126465	2.9175	0	0.999302	1	unchanged
ENSMUSG00000004032	Gstm5	glutathione S-transferase, mu 5	0.0722166	3.19892	0	0.99999	1	unchanged
ENSMUSG00000004035	Gstm7	glutathione S-transferase, mu 7	-1.21662	5.58868	-1.43737	0.0835942	0.636949	unchanged
ENSMUSG00000004038	Gstm3	glutathione S-transferase, mu 3	-0.868968	7.43395	0	0.64071	1	unchanged
ENSMUSG00000004040	Stat3	signal transducer and activator of transcription 3	0.976729	8.06709	0	0.567741	1	unchanged
ENSMUSG00000004043	Stat5a	signal transducer and activator of transcription 5A	-0.0203888	2.82633	0	0.999979	1	unchanged
ENSMUSG00000004044	Cavin1	caveolae associated 1	-0.0488882	4.8397	0	0.99998	1	unchanged
ENSMUSG00000004054	Map3k11	mitogen-activated protein kinase kinase kinase 11	-0.166415	3.3498	0	0.998095	1	unchanged
ENSMUSG00000004056	Akt2	thymoma viral proto-oncogene 2	-0.145055	5.02337	0	0.999982	1	unchanged
ENSMUSG00000004069	Dnaja3	DnaJ heat shock protein family (Hsp40) member A3	-0.109451	5.85871	0	0.999999	1	unchanged
ENSMUSG00000004070	Hmox2	heme oxygenase 2	0.361694	6.86555	0	0.999985	1	unchanged
ENSMUSG00000004071	Cdip1	cell death inducing Trp53 target 1	0.027907	5.95177	0	0.999999	1	unchanged
ENSMUSG00000004085	Map3k20	mitogen-activated protein kinase kinase kinase 20	-0.500621	3.42136	0	0.980432	1	unchanged
ENSMUSG00000004096	Cwc15	CWC15 spliceosome-associated protein	-0.0440142	6.79231	0	1	1	unchanged
ENSMUSG00000004098	Col5a3	collagen, type V, alpha 3	-1.77917	4.29482	-4.42928	0.000150027	0.00504171	downreg
ENSMUSG00000004099	Dnmt1	DNA methyltransferase 1	1.10345	3.14331	0.398256	0.347483	1	unchanged
ENSMUSG00000004100	Ppan	peter pan homolog	0.290105	3.8983	0	0.994221	1	unchanged
ENSMUSG00000004105	Angptl2	angiopoietin-like 2	-1.15331	2.11021	-0.50457	0.309887	1	unchanged
ENSMUSG00000004127	Trmt10a	tRNA methyltransferase 10A	0.0426624	3.40546	0	0.999953	1	unchanged
ENSMUSG00000004151	Etv1	ets variant 1	0.783103	-0.397995	0	0.629857	1	unchanged
ENSMUSG00000004187	Kifc2	kinesin family member C2	-1.13721	1.01419	-0.387787	0.351288	1	unchanged
ENSMUSG00000004207	Psap	prosaposin	1.36786	8.46209	1.79961	0.0440656	0.388187	unchanged
ENSMUSG00000004221	Ikbkg	inhibitor of kappaB kinase gamma	-0.528759	5.14658	0	0.995999	1	unchanged
ENSMUSG00000004233	Wars2	tryptophanyl tRNA synthetase 2 (mitochondrial)	-0.0116793	1.62591	0	0.999298	1	unchanged
ENSMUSG00000004263	Atn1	atrophin 1	-0.44633	1.89953	0	0.872229	1	unchanged
ENSMUSG00000004264	Phb2	prohibitin 2	-0.53511	7.33921	0	0.999933	1	unchanged
ENSMUSG00000004266	Ptpn6	protein tyrosine phosphatase, non-receptor type 6	1.84299	5.49232	4.03924	0.000362012	0.00987366	upreg
ENSMUSG00000004268	Emg1	EMG1 N1-specific pseudouridine methyltransferase	-0.187722	5.1325	0	1	1	unchanged
ENSMUSG00000004270	Lpcat3	lysophosphatidylcholine acyltransferase 3	-0.828776	5.59049	0	0.824489	1	unchanged
ENSMUSG00000004285	Atp6v1f	ATPase, H+ transporting, lysosomal V1 subunit F	0.0659861	7.5839	0	0.999999	1	unchanged
ENSMUSG00000004317	Clcn5	chloride channel, voltage-sensitive 5	0.579197	3.99586	0	0.986085	1	unchanged
ENSMUSG00000004319	Clcn3	chloride channel, voltage-sensitive 3	-0.217502	6.13728	0	0.999999	1	unchanged
ENSMUSG00000004356	Utp20	UTP20 small subunit processome component	-0.415313	3.06877	0	0.994869	1	unchanged
ENSMUSG00000004359	Spic	Spi-C transcription factor (Spi-1/PU.1 related)	4.58337	3.40385	4.36963	0.000172528	0.00567586	upreg
ENSMUSG00000004364	Cul3	cullin 3	-0.346638	5.09585	0	0.999996	1	unchanged
ENSMUSG00000004383	Large1	LARGE xylosyl- and glucuronyltransferase 1	0.435129	2.96249	0	0.973759	1	unchanged
ENSMUSG00000004393	Ddx56	DEAD box helicase 56	-0.14786	4.68867	0	0.999946	1	unchanged
ENSMUSG00000004394	Tmed4	transmembrane p24 trafficking protein 4	-0.0528258	5.60404	0	1	1	unchanged
ENSMUSG00000004446	Bid	BH3 interacting domain death agonist	0.108591	3.66046	0	0.999127	1	unchanged
ENSMUSG00000004451	Ralb	v-ral simian leukemia viral oncogene B	0.648865	3.94033	0	0.930652	1	unchanged
ENSMUSG00000004455	Ppp1cc	protein phosphatase 1 catalytic subunit gamma	0.537815	0.572457	0	0.828053	1	unchanged
ENSMUSG00000004460	Dnajb11	DnaJ heat shock protein family (Hsp40) member B11	0.299135	6.69737	0	0.999932	1	unchanged
ENSMUSG00000004462	Tbccd1	TBCC domain containing 1	-0.200433	3.90865	0	0.999933	1	unchanged
ENSMUSG00000004473	Clec11a	C-type lectin domain family 11, member a	-0.692587	1.66419	0	0.788669	1	unchanged
ENSMUSG00000004500	Zfp324	zinc finger protein 324	-0.13083	2.45913	0	0.996469	1	unchanged
ENSMUSG00000004508	Gab2	growth factor receptor bound protein 2-associated protein 2	2.12808	3.36937	3.79191	0.000633753	0.0153888	upreg
ENSMUSG00000004530	Coro1c	coronin, actin binding protein 1C	0.613263	5.44346	0	0.985524	1	unchanged
ENSMUSG00000004535	Tax1bp1	Tax1 (human T cell leukemia virus type I) binding protein 1	0.0826788	7.11768	0	1	1	unchanged
ENSMUSG00000004552	Ctse	cathepsin E	5.73671	-1.03195	3.47664	0.001339	0.0270617	upreg
ENSMUSG00000004558	Ndrg2	N-myc downstream regulated gene 2	-0.771265	10.0874	0	0.971517	1	unchanged
ENSMUSG00000004561	Mettl17	methyltransferase like 17	-0.328807	2.93259	0	0.998641	1	unchanged
ENSMUSG00000004562	Arhgef40	Rho guanine nucleotide exchange factor 40	-0.267961	1.75696	0	0.973962	1	unchanged
ENSMUSG00000004565	Pnpla6	patatin-like phospholipase domain containing 6	-0.3683	3.54923	0	0.995449	1	unchanged
ENSMUSG00000004567	Mcoln1	mucolipin 1	-0.568765	2.82451	0	0.949502	1	unchanged
ENSMUSG00000004568	Arhgef18	Rho/Rac guanine nucleotide exchange factor 18	-0.296509	4.39421	0	0.998658	1	unchanged
ENSMUSG00000004591	Pkn2	protein kinase N2	-0.278537	5.2971	0	0.999981	1	unchanged
ENSMUSG00000004609	Cd33	CD33 molecule	2.11794	-0.22949	1.94975	0.0332221	0.314838	unchanged
ENSMUSG00000004610	Etfb	electron transferring flavoprotein, beta polypeptide	-0.244443	8.53533	0	1	1	unchanged
ENSMUSG00000004612	Nkg7	natural killer cell group 7 sequence	3.70596	3.02644	4.27621	0.000212121	0.00676746	upreg
ENSMUSG00000004626	Stxbp2	syntaxin binding protein 2	0.526474	5.38733	0	0.99844	1	unchanged
ENSMUSG00000004631	Sgce	sarcoglycan, epsilon	0.185066	2.07027	0	0.975734	1	unchanged
ENSMUSG00000004633	Chn2	chimerin 2	-0.000949717	4.64813	0	1	1	unchanged
ENSMUSG00000004637	Wwox	WW domain-containing oxidoreductase	-0.950316	2.82808	0	0.57839	1	unchanged
ENSMUSG00000004642	Slbp	stem-loop binding protein	0.527735	1.74891	0	0.916532	1	unchanged
ENSMUSG00000004655	Aqp1	aquaporin 1	0.126649	6.28234	0	0.999953	1	unchanged
ENSMUSG00000004661	Arid3b	AT-rich interaction domain 3B	0.483875	2.66933	0	0.971515	1	unchanged
ENSMUSG00000004665	Cnn2	calponin 2	1.30943	4.16215	1.51925	0.0727401	0.572707	unchanged
ENSMUSG00000004667	Polr2e	polymerase (RNA) II (DNA directed) polypeptide E	-0.156812	5.46699	0	1	1	unchanged
ENSMUSG00000004677	Myo9b	myosin IXb	0.952758	3.69289	0	0.584345	1	unchanged
ENSMUSG00000004698	Hdac9	histone deacetylase 9	2.52056	1.1563	2.30634	0.0163999	0.183486	unchanged
ENSMUSG00000004707	Ly9	lymphocyte antigen 9	3.62202	1.82298	3.39972	0.00154027	0.030027	upreg
ENSMUSG00000004709	Cd244a	CD244 molecule A	5.21248	0.71036	3.87863	0.000529577	0.0132474	upreg
ENSMUSG00000004730	Adgre1	adhesion G protein-coupled receptor E1	3.22131	5.92757	8.26016	5.98364e-08	9.95578e-06	upreg
ENSMUSG00000004748	Mtfp1	mitochondrial fission process 1	-1.05618	4.1165	-0.329702	0.372651	1	unchanged
ENSMUSG00000004768	Rab23	RAB23, member RAS oncogene family	-0.26405	1.73073	0	0.985794	1	unchanged
ENSMUSG00000004771	Rab11a	RAB11A, member RAS oncogene family	0.325133	6.16772	0	0.999997	1	unchanged
ENSMUSG00000004788	Eif2b2	eukaryotic translation initiation factor 2B, subunit 2 beta	0.197332	4.8998	0	0.999861	1	unchanged
ENSMUSG00000004789	Dlst	dihydrolipoamide S-succinyltransferase	-0.667724	6.48673	0	0.99538	1	unchanged
ENSMUSG00000004798	Ulk2	unc-51 like kinase 2	-0.834164	5.11217	0	0.876805	1	unchanged
ENSMUSG00000004814	Ccl24	C-C motif chemokine ligand 24	3.19529	4.37642	4.36066	0.000175154	0.00573186	upreg
ENSMUSG00000004815	Dgkq	diacylglycerol kinase, theta	-0.295968	3.55573	0	0.999761	1	unchanged
ENSMUSG00000004837	Grap	GRB2-related adaptor protein	0.744837	2.32826	0	0.759103	1	unchanged
ENSMUSG00000004843	Chmp2b	charged multivesicular body protein 2B	0.277935	5.57119	0	0.999933	1	unchanged
ENSMUSG00000004846	Plod3	procollagen-lysine, 2-oxoglutarate 5-dioxygenase 3	0.38708	4.561	0	0.999036	1	unchanged
ENSMUSG00000004849	Ap1s1	adaptor protein complex AP-1, sigma 1	0.181857	4.74719	0	0.999984	1	unchanged
ENSMUSG00000004865	Srpk1	serine/arginine-rich protein specific kinase 1	0.220767	4.32968	0	0.999991	1	unchanged
ENSMUSG00000004880	Lbr	lamin B receptor	0.886267	4.81851	0	0.698343	1	unchanged
ENSMUSG00000004891	Nes	nestin	-1.12503	0.483283	-0.291174	0.387114	1	unchanged
ENSMUSG00000004895	Prcc	papillary renal cell carcinoma (translocation-associated)	0.100421	0.891268	0	0.991212	1	unchanged
ENSMUSG00000004896	Mettl25b	methyltransferase like 25B	-0.198996	2.59868	0	0.994231	1	unchanged
ENSMUSG00000004897	Hdgf	heparin binding growth factor	-0.533038	7.86451	0	0.999835	1	unchanged
ENSMUSG00000004929	Thop1	thimet oligopeptidase 1	-0.315167	1.55506	0	0.961856	1	unchanged
ENSMUSG00000004931	Apba3	amyloid beta precursor protein binding family A member 3	-0.862206	4.07969	0	0.6821	1	unchanged
ENSMUSG00000004934	Pias4	protein inhibitor of activated STAT 4	-0.199718	4.04447	0	0.99998	1	unchanged
ENSMUSG00000004936	Map2k1	mitogen-activated protein kinase kinase 1	-0.298598	4.87037	0	0.999449	1	unchanged
ENSMUSG00000004937	Sgta	small glutamine-rich tetratricopeptide repeat (TPR)-containing, alpha	-0.0615236	6.40463	0	1	1	unchanged
ENSMUSG00000004945	Tmem242	transmembrane protein 242	-0.400002	5.77332	0	0.99992	1	unchanged
ENSMUSG00000004947	Dtx2	deltex 2, E3 ubiquitin ligase	-0.00168493	2.49482	0	0.999994	1	unchanged
ENSMUSG00000004951	Hspb1	heat shock protein 1	-2.49864	3.57789	-3.05526	0.00330869	0.0538902	unchanged
ENSMUSG00000004952	Rasa4	RAS p21 protein activator 4	2.89408	3.55399	4.08038	0.000329877	0.00924019	upreg
ENSMUSG00000004980	Hnrnpa2b1	heterogeneous nuclear ribonucleoprotein A2/B1	-0.103903	7.42453	0	1	1	unchanged
ENSMUSG00000004994	Yju2b	YJU2 splicing factor homolog B	-0.153868	2.31216	0	0.999083	1	unchanged
ENSMUSG00000004996	Mri1	methylthioribose-1-phosphate isomerase 1	-0.353337	3.80276	0	0.999196	1	unchanged
ENSMUSG00000005034	Prkacb	protein kinase, cAMP dependent, catalytic, beta	-0.0103946	5.15019	0	1	1	unchanged
ENSMUSG00000005043	Sgsh	N-sulfoglucosamine sulfohydrolase (sulfamidase)	0.701763	3.12113	0	0.884831	1	unchanged
ENSMUSG00000005054	Cstb	cystatin B	0.560614	6.88624	0	0.995156	1	unchanged
ENSMUSG00000005057	Sh2b2	SH2B adaptor protein 2	0.706123	2.82471	0	0.857391	1	unchanged
ENSMUSG00000005069	Pex5	peroxisomal biogenesis factor 5	-0.676289	5.1489	0	0.963556	1	unchanged
ENSMUSG00000005078	Jkamp	JNK1/MAPK8-associated membrane protein	0.114862	5.36347	0	0.999999	1	unchanged
ENSMUSG00000005087	Cd44	CD44 antigen	3.3228	5.7439	11.2076	5.06247e-10	1.63703e-07	upreg
ENSMUSG00000005089	Slc1a2	solute carrier family 1 (glial high affinity glutamate transporter), member 2	0.184757	6.52759	0	0.999981	1	unchanged
ENSMUSG00000005102	Eif2ak4	eukaryotic translation initiation factor 2 alpha kinase 4	0.156115	3.26889	0	0.999874	1	unchanged
ENSMUSG00000005103	Wdr1	WD repeat domain 1	0.550259	5.51787	0	0.998989	1	unchanged
ENSMUSG00000005107	Slc2a9	solute carrier family 2 (facilitated glucose transporter), member 9	0.0866644	5.02214	0	0.999994	1	unchanged
ENSMUSG00000005124	Ccn4	cellular communication network factor 4	-1.16574	1.26579	-0.390749	0.35024	1	unchanged
ENSMUSG00000005125	Ndrg1	N-myc downstream regulated gene 1	-0.921764	4.70603	0	0.676774	1	unchanged
ENSMUSG00000005142	Man2b1	mannosidase 2, alpha B1	0.678038	6.72824	0	0.993554	1	unchanged
ENSMUSG00000005148	Klf5	Kruppel-like transcription factor 5	0.147521	-0.785907	0	0.930476	1	unchanged
ENSMUSG00000005150	Wdr83	WD repeat domain containing 83	-0.270038	3.56432	0	0.999893	1	unchanged
ENSMUSG00000005161	Prdx2	peroxiredoxin 2	0.0138495	6.99375	0	1	1	unchanged
ENSMUSG00000005198	Polr2a	polymerase (RNA) II (DNA directed) polypeptide A	0.299228	5.44116	0	0.999995	1	unchanged
ENSMUSG00000005204	Senp3	SUMO/sentrin specific peptidase 3	0.395604	1.78632	0	0.968799	1	unchanged
ENSMUSG00000005225	Plekha8	pleckstrin homology domain containing, family A (phosphoinositide binding specific) member 8	-0.809939	3.62847	0	0.809336	1	unchanged
ENSMUSG00000005233	Spc25	SPC25, NDC80 kinetochore complex component, homolog (S. cerevisiae)	-0.0440203	2.54059	0	0.993164	1	unchanged
ENSMUSG00000005251	Ripk4	receptor-interacting serine-threonine kinase 4	0.261481	2.02555	0	0.985544	1	unchanged
ENSMUSG00000005262	Ufd1	ubiquitin recognition factor in ER-associated degradation 1	0.138954	5.75979	0	0.999999	1	unchanged
ENSMUSG00000005268	Prlr	prolactin receptor	0.222317	6.89167	0	0.999672	1	unchanged
ENSMUSG00000005299	Letm1	leucine zipper-EF-hand containing transmembrane protein 1	-0.848848	5.95008	0	0.906563	1	unchanged
ENSMUSG00000005312	Ubqln1	ubiquilin 1	-0.567809	6.75345	0	0.999688	1	unchanged
ENSMUSG00000005320	Fgfr4	fibroblast growth factor receptor 4	-0.312908	4.02026	0	0.999713	1	unchanged
ENSMUSG00000005338	Cadm3	cell adhesion molecule 3	-0.51485	1.34371	0	0.925476	1	unchanged
ENSMUSG00000005354	Txn2	thioredoxin 2	-0.190399	7.09143	0	1	1	unchanged
ENSMUSG00000005360	Slc1a3	solute carrier family 1 (glial high affinity glutamate transporter), member 3	2.88083	2.44747	3.55139	0.00109172	0.0231214	upreg
ENSMUSG00000005362	Crbn	cereblon	0.612043	3.20951	0	0.964365	1	unchanged
ENSMUSG00000005370	Msh6	mutS homolog 6	0.039391	3.82089	0	0.999981	1	unchanged
ENSMUSG00000005371	Fbxo11	F-box protein 11	0.0374271	3.66042	0	0.999968	1	unchanged
ENSMUSG00000005373	Mlxipl	MLX interacting protein-like	-1.93422	6.55874	-3.98362	0.00041059	0.0109972	downreg
ENSMUSG00000005374	Tbl2	transducin (beta)-like 2	0.246345	4.23824	0	0.999752	1	unchanged
ENSMUSG00000005378	Bud23	BUD23, rRNA methyltransferase and ribosome maturation factor	-0.23442	4.64184	0	0.999993	1	unchanged
ENSMUSG00000005397	Nid1	nidogen 1	1.06717	3.66029	0.236443	0.407834	1	unchanged
ENSMUSG00000005410	Mcm5	minichromosome maintenance complex component 5	2.07566	3.27845	2.55331	0.00980485	0.123099	unchanged
ENSMUSG00000005413	Hmox1	heme oxygenase 1	2.69935	5.05114	3.40829	0.00150636	0.029587	upreg
ENSMUSG00000005417	Mprip	myosin phosphatase Rho interacting protein	-0.358689	6.03317	0	0.999999	1	unchanged
ENSMUSG00000005442	Cic	capicua transcriptional repressor	0.470359	4.0283	0	0.996899	1	unchanged
ENSMUSG00000005447	Pafah1b3	platelet-activating factor acetylhydrolase, isoform 1b, subunit 3	1.10944	3.3016	0.43936	0.332726	1	unchanged
ENSMUSG00000005469	Prkaca	protein kinase, cAMP dependent, catalytic, alpha	-0.363367	5.97662	0	0.99991	1	unchanged
ENSMUSG00000005470	Asf1b	anti-silencing function 1B histone chaperone	2.26376	1.96438	2.25512	0.0181859	0.197954	unchanged
ENSMUSG00000005481	Ddx39a	DEAD box helicase 39a	0.567759	4.3312	0	0.991016	1	unchanged
ENSMUSG00000005483	Dnajb1	DnaJ heat shock protein family (Hsp40) member B1	-0.760678	5.33854	0	0.781409	1	unchanged
ENSMUSG00000005501	Usp40	ubiquitin specific peptidase 40	-0.0860592	4.66802	0	0.999999	1	unchanged
ENSMUSG00000005505	Kbtbd4	kelch repeat and BTB (POZ) domain containing 4	0.0329161	2.65947	0	0.99998	1	unchanged
ENSMUSG00000005506	Celf1	CUGBP, Elav-like family member 1	-0.244199	6.63549	0	1	1	unchanged
ENSMUSG00000005510	Ndufs3	NADH:ubiquinone oxidoreductase core subunit S3	-0.49673	5.23644	0	0.998858	1	unchanged
ENSMUSG00000005514	Por	cytochrome p450 oxidoreductase	0.867228	7.58452	0	0.73285	1	unchanged
ENSMUSG00000005533	Igf1r	insulin-like growth factor I receptor	0.128317	2.58172	0	0.999659	1	unchanged
ENSMUSG00000005534	Insr	insulin receptor	-0.0440386	5.34793	0	1	1	unchanged
ENSMUSG00000005547	Cyp2a5	cytochrome P450, family 2, subfamily a, polypeptide 5	-0.784961	8.32135	0	0.777079	1	unchanged
ENSMUSG00000005553	Atp4a	ATPase, H+/K+ exchanging, gastric, alpha polypeptide	-1.42291	0.378016	-0.739682	0.234585	1	unchanged
ENSMUSG00000005566	Trim28	tripartite motif-containing 28	0.136195	5.53457	0	0.99999	1	unchanged
ENSMUSG00000005575	Ube2m	ubiquitin-conjugating enzyme E2M	-0.0399856	4.15612	0	0.999988	1	unchanged
ENSMUSG00000005580	Adcy9	adenylate cyclase 9	-0.596086	3.76045	0	0.990361	1	unchanged
ENSMUSG00000005583	Mef2c	myocyte enhancer factor 2C	0.950754	3.71165	0	0.568772	1	unchanged
ENSMUSG00000005609	Ctr9	CTR9 homolog, Paf1/RNA polymerase II complex component	0.0523478	5.47486	0	1	1	unchanged
ENSMUSG00000005610	Eif4g2	eukaryotic translation initiation factor 4, gamma 2	-0.114384	8.6001	0	1	1	unchanged
ENSMUSG00000005611	Irag1	inositol 1,4,5-triphosphate receptor associated 1	0.650307	0.978516	0	0.800189	1	unchanged
ENSMUSG00000005615	Pcyt1a	phosphate cytidylyltransferase 1, choline, alpha isoform	-0.137303	5.67558	0	1	1	unchanged
ENSMUSG00000005621	Zfp592	zinc finger protein 592	-0.134136	3.92626	0	0.99994	1	unchanged
ENSMUSG00000005625	Psmd4	proteasome (prosome, macropain) 26S subunit, non-ATPase, 4	-0.194885	7.52255	0	0.999997	1	unchanged
ENSMUSG00000005656	Snx6	sorting nexin 6	0.624808	5.02584	0	0.98623	1	unchanged
ENSMUSG00000005667	Mthfd2	methylenetetrahydrofolate dehydrogenase (NAD+ dependent), methenyltetrahydrofolate cyclohydrolase	0.905197	2.78431	0	0.660636	1	unchanged
ENSMUSG00000005672	Kit	KIT proto-oncogene receptor tyrosine kinase	-0.190121	1.81469	0	0.980084	1	unchanged
ENSMUSG00000005674	Tomm40l	translocase of outer mitochondrial membrane 40-like	-0.51535	2.99903	0	0.971688	1	unchanged
ENSMUSG00000005677	Nr1i3	nuclear receptor subfamily 1, group I, member 3	0.410353	6.49381	0	0.999726	1	unchanged
ENSMUSG00000005681	Apoa2	apolipoprotein A-II	-1.24592	12.0483	-1.92854	0.0345793	0.324453	unchanged
ENSMUSG00000005682	Pan2	PAN2 poly(A) specific ribonuclease subunit	-0.408507	3.58916	0	0.995709	1	unchanged
ENSMUSG00000005683	Cs	citrate synthase	-0.771481	6.29982	0	0.944544	1	unchanged
ENSMUSG00000005686	Ampd3	adenosine monophosphate deaminase 3	1.73724	0.491911	1.3291	0.0999757	0.722864	unchanged
ENSMUSG00000005687	Bcas2	BCAS2 pre-mRNA processing factor	0.131529	4.39927	0	0.99998	1	unchanged
ENSMUSG00000005698	Ctcf	CCCTC-binding factor	0.121586	4.96622	0	0.999899	1	unchanged
ENSMUSG00000005699	Pard6a	par-6 family cell polarity regulator alpha	-0.384938	2.37932	0	0.979423	1	unchanged
ENSMUSG00000005718	Tfap4	transcription factor AP4	-0.884496	0.655621	0	0.605682	1	unchanged
ENSMUSG00000005732	Ranbp1	RAN binding protein 1	0.367707	5.18458	0	0.999982	1	unchanged
ENSMUSG00000005763	Cd247	CD247 antigen	3.36662	0.853587	3.09873	0.00301384	0.0499469	upreg
ENSMUSG00000005774	Rfx5	regulatory factor X, 5 (influences HLA class II expression)	0.367259	3.4909	0	0.984566	1	unchanged
ENSMUSG00000005779	Psmb4	proteasome (prosome, macropain) subunit, beta type 4	0.0344718	8.18957	0	1	1	unchanged
ENSMUSG00000005800	Mmp8	matrix metallopeptidase 8	6.1578	0.537768	3.32746	0.00190365	0.03486	upreg
ENSMUSG00000005802	Slc30a4	solute carrier family 30 (zinc transporter), member 4	-0.768193	2.65915	0	0.763183	1	unchanged
ENSMUSG00000005803	Sqor	sulfide quinone oxidoreductase	-0.636705	6.19052	0	0.992055	1	unchanged
ENSMUSG00000005804	Bloc1s6	biogenesis of lysosomal organelles complex-1, subunit 6, pallidin	0.538897	3.23364	0	0.978734	1	unchanged
ENSMUSG00000005813	Metap1	methionyl aminopeptidase 1	-0.100756	5.42875	0	0.999999	1	unchanged
ENSMUSG00000005823	Gpr108	G protein-coupled receptor 108	0.0868002	4.35458	0	0.999996	1	unchanged
ENSMUSG00000005824	Tnfsf14	tumor necrosis factor (ligand) superfamily, member 14	4.11119	-0.523837	3.81828	0.000599792	0.0146947	upreg
ENSMUSG00000005836	Gata6	GATA binding protein 6	0.973973	3.58118	0	0.549067	1	unchanged
ENSMUSG00000005846	Rsl1d1	ribosomal L1 domain containing 1	-0.0270777	5.83819	0	1	1	unchanged
ENSMUSG00000005871	Apc	APC, WNT signaling pathway regulator	0.20388	4.25323	0	0.999955	1	unchanged
ENSMUSG00000005873	Reep5	receptor accessory protein 5	0.379277	4.83207	0	0.999792	1	unchanged
ENSMUSG00000005881	Ergic3	ERGIC and golgi 3	-0.331892	5.90252	0	0.999992	1	unchanged
ENSMUSG00000005882	Uqcc1	ubiquinol-cytochrome c reductase complex assembly factor 1	-0.384748	4.23584	0	0.999594	1	unchanged
ENSMUSG00000005886	Ncoa2	nuclear receptor coactivator 2	-0.165905	4.32701	0	0.999971	1	unchanged
ENSMUSG00000005893	Nr2c2	nuclear receptor subfamily 2, group C, member 2	-0.195459	4.54106	0	0.999995	1	unchanged
ENSMUSG00000005897	Nr2c1	nuclear receptor subfamily 2, group C, member 1	-0.0590534	3.04659	0	0.998982	1	unchanged
ENSMUSG00000005899	Smpd4	sphingomyelin phosphodiesterase 4	0.0541026	2.31129	0	0.999446	1	unchanged
ENSMUSG00000005907	Pex1	peroxisomal biogenesis factor 1	-0.423656	4.0982	0	0.997428	1	unchanged
ENSMUSG00000005936	Kctd20	potassium channel tetramerisation domain containing 20	-0.0840827	4.41857	0	0.99999	1	unchanged
ENSMUSG00000005949	Ctns	cystinosis, nephropathic	-0.115255	2.64567	0	0.998842	1	unchanged
ENSMUSG00000005951	Shpk	sedoheptulokinase	-0.123115	4.19717	0	0.999982	1	unchanged
ENSMUSG00000005968	Tuft1	tuftelin 1	-0.435964	2.41485	0	0.924405	1	unchanged
ENSMUSG00000005973	Rcn1	reticulocalbin 1	0.865041	3.56135	0	0.687603	1	unchanged
ENSMUSG00000005981	Trap1	TNF receptor-associated protein 1	-0.830767	6.34237	0	0.904305	1	unchanged
ENSMUSG00000005982	Naa60	N(alpha)-acetyltransferase 60, NatF catalytic subunit	-0.396008	6.18905	0	0.999907	1	unchanged
ENSMUSG00000005983	1700037C18Rik	RIKEN cDNA 1700037C18 gene	1.37731	-0.43371	0.405507	0.354631	1	unchanged
ENSMUSG00000006005	Tpr	translocated promoter region, nuclear basket protein	0.33433	6.63949	0	0.999611	1	unchanged
ENSMUSG00000006010	Odr4	odr4 GPCR localization factor homolog	0.0483984	5.74881	0	1	1	unchanged
ENSMUSG00000006014	Prg4	proteoglycan 4 (megakaryocyte stimulating factor, articular superficial zone protein)	2.63605	6.52924	13.9284	1.33231e-11	1.10399e-08	upreg
ENSMUSG00000006019	Dhx34	DExH-box helicase 34	0.296082	2.14642	0	0.984848	1	unchanged
ENSMUSG00000006021	Kptn	kaptin	-0.449205	2.65193	0	0.991753	1	unchanged
ENSMUSG00000006024	Napa	N-ethylmaleimide sensitive fusion protein attachment protein alpha	0.103558	5.63896	0	1	1	unchanged
ENSMUSG00000006050	Sra1	steroid receptor RNA activator 1	0.0838648	5.97775	0	0.999999	1	unchanged
ENSMUSG00000006057	Atp5mc1	ATP synthase membrane subunit c locus 1	-0.416947	6.56675	0	0.999985	1	unchanged
ENSMUSG00000006058	Snf8	SNF8, ESCRT-II complex subunit, homolog (S. cerevisiae)	-0.229608	5.3399	0	0.999998	1	unchanged
ENSMUSG00000006095	Tbcb	tubulin folding cofactor B	0.0607226	5.4552	0	0.999999	1	unchanged
ENSMUSG00000006127	Inpp5k	inositol polyphosphate 5-phosphatase K	0.437596	3.24636	0	0.996392	1	unchanged
ENSMUSG00000006154	Eps8l1	EPS8-like 1	-0.703406	0.510227	0	0.729446	1	unchanged
ENSMUSG00000006169	Clint1	clathrin interactor 1	-0.211616	5.2215	0	0.999994	1	unchanged
ENSMUSG00000006191	Cdkal1	CDK5 regulatory subunit associated protein 1-like 1	-0.283528	3.89136	0	0.999931	1	unchanged
ENSMUSG00000006205	Htra1	HtrA serine peptidase 1	1.15798	1.80117	0.196921	0.430342	1	unchanged
ENSMUSG00000006215	Zbtb17	zinc finger and BTB domain containing 17	0.125	2.78559	0	0.996169	1	unchanged
ENSMUSG00000006218	Fam131c	family with sequence similarity 131, member C	0.696886	0.0271066	0	0.694363	1	unchanged
ENSMUSG00000006219	Fblim1	filamin binding LIM protein 1	2.6287	2.45899	2.95577	0.00411945	0.0642537	unchanged
ENSMUSG00000006235	Epor	erythropoietin receptor	1.55411	-0.768963	0.762178	0.228935	1	unchanged
ENSMUSG00000006241	Ccdc159	coiled-coil domain containing 159	-0.444498	0.0920294	0	0.854223	1	unchanged
ENSMUSG00000006262	Mob1b	MOB kinase activator 1B	-0.407287	4.26975	0	0.997315	1	unchanged
ENSMUSG00000006273	Atp6v1b2	ATPase, H+ transporting, lysosomal V1 subunit B2	0.711683	6.541	0	0.977809	1	unchanged
ENSMUSG00000006276	Eps15l1	epidermal growth factor receptor pathway substrate 15-like 1	0.0320754	3.18782	0	0.999903	1	unchanged
ENSMUSG00000006281	Tep1	telomerase associated protein 1	0.580953	3.87961	0	0.974355	1	unchanged
ENSMUSG00000006288	Ttc5	tetratricopeptide repeat domain 5	0.831295	-0.0939981	0	0.611801	1	unchanged
ENSMUSG00000006289	Osgep	O-sialoglycoprotein endopeptidase	-0.221716	4.02115	0	0.999925	1	unchanged
ENSMUSG00000006299	Aamp	angio-associated migratory protein	-0.344005	7.51081	0	0.999619	1	unchanged
ENSMUSG00000006301	Tmbim1	transmembrane BAX inhibitor motif containing 1	0.184002	5.02615	0	0.999983	1	unchanged
ENSMUSG00000006304	Arpc2	actin related protein 2/3 complex, subunit 2	0.514532	8.01078	0	0.99992	1	unchanged
ENSMUSG00000006307	Kmt2b	lysine (K)-specific methyltransferase 2B	0.220626	3.35213	0	0.997659	1	unchanged
ENSMUSG00000006315	Tmem147	transmembrane protein 147	-0.754521	6.4619	0	0.964622	1	unchanged
ENSMUSG00000006333	Rps9	ribosomal protein S9	0.411161	7.97917	0	0.999698	1	unchanged
ENSMUSG00000006335	Tfpt	TCF3 (E2A) fusion partner	0.112901	2.04219	0	0.996069	1	unchanged
ENSMUSG00000006342	Susd2	sushi domain containing 2	1.52478	1.76103	1.52854	0.071586	0.566281	unchanged
ENSMUSG00000006344	Ggt5	gamma-glutamyltransferase 5	1.71479	2.56254	2.1595	0.022032	0.227315	unchanged
ENSMUSG00000006356	Crip2	cysteine rich protein 2	0.123473	6.96977	0	1	1	unchanged
ENSMUSG00000006360	Crip1	cysteine-rich protein 1	1.9848	4.83845	3.95511	0.000437973	0.011544	upreg
ENSMUSG00000006362	Cbfa2t3	CBFA2/RUNX1 translocation partner 3	0.922995	2.75643	0	0.595009	1	unchanged
ENSMUSG00000006369	Fbln1	fibulin 1	-0.80149	-0.26423	0	0.628116	1	unchanged
ENSMUSG00000006373	Pgrmc1	progesterone receptor membrane component 1	-0.803513	8.15116	0	0.907214	1	unchanged
ENSMUSG00000006378	Gcat	glycine C-acetyltransferase (2-amino-3-ketobutyrate-coenzyme A ligase)	-1.57963	5.66995	-4.03842	0.000362685	0.00987366	downreg
ENSMUSG00000006386	Tek	TEK receptor tyrosine kinase	-0.518615	2.10694	0	0.943644	1	unchanged
ENSMUSG00000006390	Elovl1	ELOVL fatty acid elongase 1	0.0918524	5.98453	0	1	1	unchanged
ENSMUSG00000006392	Med8	mediator complex subunit 8	-0.135343	6.10019	0	1	1	unchanged
ENSMUSG00000006395	Hyi	hydroxypyruvate isomerase (putative)	-1.72284	6.24668	-4.88626	5.40037e-05	0.00228019	downreg
ENSMUSG00000006398	Cdc20	cell division cycle 20	2.29747	3.1639	1.84365	0.04068	0.365156	unchanged
ENSMUSG00000006403	Adamts4	ADAM metallopeptidase with thrombospondin type 1 motif 4	2.56137	0.829103	1.46589	0.0814141	0.623564	unchanged
ENSMUSG00000006411	Nectin4	nectin cell adhesion molecule 4	1.53647	-0.714309	0.566388	0.296465	1	unchanged
ENSMUSG00000006412	Pfdn2	prefoldin 2	-0.379065	4.72507	0	0.999873	1	unchanged
ENSMUSG00000006418	Rnf114	ring finger protein 114	0.437083	5.63037	0	0.999919	1	unchanged
ENSMUSG00000006423	Steep1	STING1 ER exit protein 1	-0.220235	2.24334	0	0.994361	1	unchanged
ENSMUSG00000006442	Srm	spermidine synthase	0.0997647	5.32509	0	0.999966	1	unchanged
ENSMUSG00000006445	Epha2	Eph receptor A2	0.529895	1.65346	0	0.853709	1	unchanged
ENSMUSG00000006456	Rbm14	RNA binding motif protein 14	0.0604353	3.75488	0	0.999861	1	unchanged
ENSMUSG00000006463	Zdhhc24	zinc finger, DHHC domain containing 24	0.754153	0.786511	0	0.667781	1	unchanged
ENSMUSG00000006471	Ndor1	NADPH dependent diflavin oxidoreductase 1	-0.0181519	2.42573	0	0.999886	1	unchanged
ENSMUSG00000006476	Nsmf	NMDA receptor synaptonuclear signaling and neuronal migration factor	-0.816057	5.45938	0	0.894988	1	unchanged
ENSMUSG00000006494	Pdk1	pyruvate dehydrogenase kinase, isoenzyme 1	-0.931189	4.8436	0	0.642416	1	unchanged
ENSMUSG00000006498	Ptbp1	polypyrimidine tract binding protein 1	0.364297	5.42226	0	0.999972	1	unchanged
ENSMUSG00000006517	Mvd	mevalonate (diphospho) decarboxylase	0.536323	5.47763	0	0.842523	1	unchanged
ENSMUSG00000006519	Cyba	cytochrome b-245, alpha polypeptide	3.11552	5.59731	8.7459	2.53966e-08	4.95159e-06	upreg
ENSMUSG00000006522	Itih3	inter-alpha trypsin inhibitor, heavy chain 3	3.01804	10.9776	11.9624	1.73001e-10	7.90912e-08	upreg
ENSMUSG00000006526	Stimate	STIM activating enhancer	0.717199	3.40769	0	0.920846	1	unchanged
ENSMUSG00000006527	Sfmbt1	Scm-like with four mbt domains 1	-0.284544	4.87761	0	0.999979	1	unchanged
ENSMUSG00000006529	Itih1	inter-alpha trypsin inhibitor, heavy chain 1	0.534987	8.38429	0	0.996492	1	unchanged
ENSMUSG00000006538	Ihh	Indian hedgehog	-1.53469	-0.3259	-0.676919	0.255738	1	unchanged
ENSMUSG00000006567	Atp7b	ATPase, Cu++ transporting, beta polypeptide	-0.341563	2.81449	0	0.994949	1	unchanged
ENSMUSG00000006574	Slc4a1	solute carrier family 4 (anion exchanger), member 1	5.99456	-0.112704	2.43355	0.0141088	0.165089	unchanged
ENSMUSG00000006575	Rundc3a	RUN domain containing 3A	1.00166	-0.145931	0.00222881	0.5066	1	unchanged
ENSMUSG00000006585	Cdt1	chromatin licensing and DNA replication factor 1	1.63115	3.15922	1.78028	0.045669	0.398604	unchanged
ENSMUSG00000006586	Runx1t1	RUNX1 translocation partner 1	0.713104	-0.182825	0	0.702243	1	unchanged
ENSMUSG00000006589	Aprt	adenine phosphoribosyl transferase	0.859012	5.9821	0	0.791814	1	unchanged
ENSMUSG00000006599	Gtf2h1	general transcription factor II H, polypeptide 1	-0.306594	4.32635	0	0.999816	1	unchanged
ENSMUSG00000006611	Hfe	homeostatic iron regulator	0.393276	5.31181	0	0.999989	1	unchanged
ENSMUSG00000006638	Abhd1	abhydrolase domain containing 1	-0.232802	1.46925	0	0.986175	1	unchanged
ENSMUSG00000006641	Slc5a6	solute carrier family 5 (sodium-dependent vitamin transporter), member 6	0.142016	2.6397	0	0.999555	1	unchanged
ENSMUSG00000006673	Qrich1	glutamine-rich 1	0.104334	4.30038	0	0.999991	1	unchanged
ENSMUSG00000006676	Usp19	ubiquitin specific peptidase 19	-0.359822	4.70467	0	0.995861	1	unchanged
ENSMUSG00000006678	Pola1	polymerase (DNA directed), alpha 1	0.381504	2.14059	0	0.97141	1	unchanged
ENSMUSG00000006699	Cdc42	cell division cycle 42	0.321168	7.97266	0	0.999999	1	unchanged
ENSMUSG00000006705	Pknox1	Pbx/knotted 1 homeobox	0.382468	3.94462	0	0.9981	1	unchanged
ENSMUSG00000006711	D130043K22Rik	RIKEN cDNA D130043K22 gene	-2.82523	1.20153	-4.47048	0.000136754	0.00466088	downreg
ENSMUSG00000006715	Gmnn	geminin	0.873911	2.69371	0	0.654285	1	unchanged
ENSMUSG00000006717	Acot13	acyl-CoA thioesterase 13	-0.998648	6.58934	0	0.505208	1	unchanged
ENSMUSG00000006728	Cdk4	cyclin dependent kinase 4	0.415684	3.88969	0	0.998127	1	unchanged
ENSMUSG00000006731	B4galnt1	beta-1,4-N-acetyl-galactosaminyl transferase 1	0.279276	5.58697	0	0.999758	1	unchanged
ENSMUSG00000006732	Mettl1	methyltransferase 1, tRNA methylguanosine	0.355747	4.3753	0	0.995204	1	unchanged
ENSMUSG00000006736	Tspan31	tetraspanin 31	-0.0852089	6.23829	0	0.999997	1	unchanged
ENSMUSG00000006740	Kif5b	kinesin family member 5B	0.358359	6.11038	0	0.999976	1	unchanged
ENSMUSG00000006763	Saal1	serum amyloid A-like 1	0.487175	2.55302	0	0.971925	1	unchanged
ENSMUSG00000006777	Krt23	keratin 23	-3.04217	-1.15276	-1.85377	0.04067	0.365156	unchanged
ENSMUSG00000006782	Cnp	2',3'-cyclic nucleotide 3' phosphodiesterase	0.345345	4.30451	0	0.992491	1	unchanged
ENSMUSG00000006800	Sulf2	sulfatase 2	-1.40035	2.35096	-1.54304	0.0698143	0.554915	unchanged
ENSMUSG00000006818	Sod2	superoxide dismutase 2, mitochondrial	-0.118768	8.33017	0	0.999998	1	unchanged
ENSMUSG00000006906	Stambp	STAM binding protein	0.0481616	3.52819	0	0.999984	1	unchanged
ENSMUSG00000006920	Ezh1	enhancer of zeste 1 polycomb repressive complex 2 subunit	0.211559	3.92348	0	0.999917	1	unchanged
ENSMUSG00000006930	Hap1	huntingtin-associated protein 1	1.52116	1.03756	1.0301	0.158117	1	unchanged
ENSMUSG00000006931	P3h4	prolyl 3-hydroxylase family member 4 (non-enzymatic)	-0.552378	0.685052	0	0.825281	1	unchanged
ENSMUSG00000006932	Ctnnb1	catenin beta 1	-0.0223081	7.80698	0	1	1	unchanged
ENSMUSG00000006941	Eif1b	eukaryotic translation initiation factor 1B	-0.218082	5.14631	0	0.999989	1	unchanged
ENSMUSG00000006958	Chrd	chordin	0.83862	1.84751	0	0.66918	1	unchanged
ENSMUSG00000006998	Psmd2	proteasome (prosome, macropain) 26S subunit, non-ATPase, 2	-0.155649	7.05563	0	1	1	unchanged
ENSMUSG00000007029	Vars1	valyl-tRNA synthetase 1	0.720555	4.27244	0	0.940117	1	unchanged
ENSMUSG00000007030	Vwa7	von Willebrand factor A domain containing 7	-0.442369	-0.947272	0	0.791022	1	unchanged
ENSMUSG00000007035	Msh5	mutS homolog 5	-0.292516	-0.397692	0	0.887989	1	unchanged
ENSMUSG00000007036	Abhd16a	abhydrolase domain containing 16A	0.119803	5.5666	0	0.999999	1	unchanged
ENSMUSG00000007038	Neu1	neuraminidase 1	0.190143	5.27965	0	1	1	unchanged
ENSMUSG00000007039	Ddah2	DDAH family member 2, ADMA independent	-0.150108	2.60984	0	0.998784	1	unchanged
ENSMUSG00000007041	Clic1	chloride intracellular channel 1	1.85346	4.64705	2.85974	0.00507962	0.0747454	unchanged
ENSMUSG00000007050	Lsm2	LSM2 homolog, U6 small nuclear RNA and mRNA degradation associated	0.0674305	3.88013	0	0.999925	1	unchanged
ENSMUSG00000007080	Pole	polymerase (DNA directed), epsilon	1.12724	1.53808	0.308066	0.380754	1	unchanged
ENSMUSG00000007097	Atp1a2	ATPase, Na+/K+ transporting, alpha 2 polypeptide	-0.231059	0.45402	0	0.91897	1	unchanged
ENSMUSG00000007216	Zfp775	zinc finger protein 775	-0.22795	1.95545	0	0.995237	1	unchanged
ENSMUSG00000007338	Mrpl49	mitochondrial ribosomal protein L49	-0.733369	4.56739	0	0.96994	1	unchanged
ENSMUSG00000007411	Mark3	MAP/microtubule affinity regulating kinase 3	-0.0189944	5.05054	0	1	1	unchanged
ENSMUSG00000007415	Gatad1	GATA zinc finger domain containing 1	-0.303985	5.77811	0	0.999996	1	unchanged
ENSMUSG00000007458	M6pr	mannose-6-phosphate receptor, cation dependent	0.24411	6.16175	0	0.999987	1	unchanged
ENSMUSG00000007476	Lrrc8a	leucine rich repeat containing 8A VRAC subunit A	0.932171	5.12051	0	0.694726	1	unchanged
ENSMUSG00000007564	Ppp2r1a	protein phosphatase 2, regulatory subunit A, alpha	0.0352083	5.5615	0	1	1	unchanged
ENSMUSG00000007570	Fance	Fanconi anemia, complementation group E	-0.610966	3.09953	0	0.973424	1	unchanged
ENSMUSG00000007589	Tinf2	Terf1 (TRF1)-interacting nuclear factor 2	0.251055	3.20869	0	0.998833	1	unchanged
ENSMUSG00000007594	Hapln4	hyaluronan and proteoglycan link protein 4	0.278713	2.91323	0	0.983838	1	unchanged
ENSMUSG00000007603	Dus3l	dihydrouridine synthase 3 like	-0.0748484	2.67984	0	0.99906	1	unchanged
ENSMUSG00000007610	Gtpbp3	GTP binding protein 3	-0.584576	2.9747	0	0.962156	1	unchanged
ENSMUSG00000007613	Tgfbr1	transforming growth factor, beta receptor I	0.323018	3.85455	0	0.999635	1	unchanged
ENSMUSG00000007617	Homer1	homer scaffolding protein 1	-0.0947614	3.29902	0	0.999965	1	unchanged
ENSMUSG00000007646	Rad51c	RAD51 paralog C	-0.138113	-0.400448	0	0.950108	1	unchanged
ENSMUSG00000007655	Cav1	caveolin 1, caveolae protein	0.0700419	1.0728	0	0.991353	1	unchanged
ENSMUSG00000007656	Arpp19	cAMP-regulated phosphoprotein 19	-0.189129	7.07475	0	1	1	unchanged
ENSMUSG00000007659	Bcl2l1	BCL2-like 1	0.313217	4.99105	0	0.999536	1	unchanged
ENSMUSG00000007670	Khsrp	KH-type splicing regulatory protein	-0.00836268	5.12092	0	1	1	unchanged
ENSMUSG00000007721	Ccdc124	coiled-coil domain containing 124	-0.135982	4.23052	0	0.999987	1	unchanged
ENSMUSG00000007739	Cct4	chaperonin containing TCP1 subunit 4	-0.319258	6.13203	0	0.99999	1	unchanged
ENSMUSG00000007777	Trappc2b	trafficking protein particle complex 2B	-0.132215	3.98071	0	0.999833	1	unchanged
ENSMUSG00000007812	Zfp655	zinc finger protein 655	-0.33361	4.21528	0	0.999797	1	unchanged
ENSMUSG00000007815	Rhoa	ras homolog family member A	0.199861	6.90928	0	0.999919	1	unchanged
ENSMUSG00000007817	Zmiz1	zinc finger, MIZ-type containing 1	-0.0416557	4.8781	0	0.999996	1	unchanged
ENSMUSG00000007827	Ankrd26	ankyrin repeat domain 26	-0.762043	2.34655	0	0.758297	1	unchanged
ENSMUSG00000007833	Aldh16a1	aldehyde dehydrogenase 16 family, member A1	0.296304	5.39357	0	0.999998	1	unchanged
ENSMUSG00000007836	Hnrnpa0	heterogeneous nuclear ribonucleoprotein A0	0.24889	6.59927	0	0.999996	1	unchanged
ENSMUSG00000007837	Prrg2	proline-rich Gla (G-carboxyglutamic acid) polypeptide 2	-0.623557	5.35018	0	0.987912	1	unchanged
ENSMUSG00000007850	Hnrnph1	heterogeneous nuclear ribonucleoprotein H1	0.00538817	3.17289	0	0.999975	1	unchanged
ENSMUSG00000007867	Ift43	intraflagellar transport 43	0.471884	2.36443	0	0.948423	1	unchanged
ENSMUSG00000007872	Id3	inhibitor of DNA binding 3	0.949668	7.10903	0	0.549929	1	unchanged
ENSMUSG00000007880	Arid1a	AT-rich interaction domain 1A	0.273565	4.96023	0	0.999975	1	unchanged
ENSMUSG00000007891	Ctsd	cathepsin D	0.871625	9.00996	0	0.879326	1	unchanged
ENSMUSG00000007892	Rplp1	ribosomal protein lateral stalk subunit P1	0.123299	10.1304	0	1	1	unchanged
ENSMUSG00000007950	Abhd8	abhydrolase domain containing 8	-0.361853	1.73125	0	0.983362	1	unchanged
ENSMUSG00000007987	Ift22	intraflagellar transport 22	0.767609	2.29426	0	0.745488	1	unchanged
ENSMUSG00000008035	Mid1ip1	Mid1 interacting protein 1 (gastrulation specific G12-like (zebrafish))	-0.520768	5.52485	0	0.921069	1	unchanged
ENSMUSG00000008036	Ap2s1	adaptor-related protein complex 2, sigma 1 subunit	0.237868	5.56203	0	0.999976	1	unchanged
ENSMUSG00000008090	Fgfrl1	fibroblast growth factor receptor-like 1	-0.444321	4.2683	0	0.99268	1	unchanged
ENSMUSG00000008136	Fhl2	four and a half LIM domains 2	0.237758	-0.363755	0	0.918764	1	unchanged
ENSMUSG00000008140	Emc10	ER membrane protein complex subunit 10	-0.0122856	5.91457	0	1	1	unchanged
ENSMUSG00000008153	Clstn3	calsyntenin 3	-2.38382	0.936868	-3.11807	0.00287918	0.0481971	downreg
ENSMUSG00000008167	Fbxw9	F-box and WD-40 domain protein 9	-0.0511193	4.5475	0	0.999992	1	unchanged
ENSMUSG00000008193	Spib	Spi-B transcription factor (Spi-1/PU.1 related)	0.198968	-0.262938	0	0.930337	1	unchanged
ENSMUSG00000008200	Fnbp4	formin binding protein 4	0.290775	3.63665	0	0.999796	1	unchanged
ENSMUSG00000008206	Cers4	ceramide synthase 4	0.525585	2.34517	0	0.977528	1	unchanged
ENSMUSG00000008226	Scrn3	secernin 3	-0.771691	4.50505	0	0.908993	1	unchanged
ENSMUSG00000008301	Phax	phosphorylated adaptor for RNA export	0.0256279	4.51666	0	1	1	unchanged
ENSMUSG00000008305	Tle1	transducin-like enhancer of split 1	-0.605778	4.86486	0	0.991198	1	unchanged
ENSMUSG00000008318	Relt	RELT tumor necrosis factor receptor	3.18638	0.966549	2.76881	0.00620851	0.087103	unchanged
ENSMUSG00000008333	Snrpb2	U2 small nuclear ribonucleoprotein B	0.330752	6.27893	0	0.999998	1	unchanged
ENSMUSG00000008348	Ubc	ubiquitin C	-0.681455	10.7096	0	0.870908	1	unchanged
ENSMUSG00000008373	Prpf31	pre-mRNA processing factor 31	0.413864	3.49977	0	0.996766	1	unchanged
ENSMUSG00000008384	Sertad1	SERTA domain containing 1	0.911875	3.69588	0	0.640353	1	unchanged
ENSMUSG00000008393	Carhsp1	calcium regulated heat stable protein 1	-0.503512	5.50245	0	0.999592	1	unchanged
ENSMUSG00000008398	Elk3	ELK3, member of ETS oncogene family	0.175481	3.41731	0	0.999854	1	unchanged
ENSMUSG00000008429	Herpud2	HERPUD family member 2	0.0259205	4.75598	0	1	1	unchanged
ENSMUSG00000008435	Rdh13	retinol dehydrogenase 13 (all-trans and 9-cis)	0.183567	2.95085	0	0.997902	1	unchanged
ENSMUSG00000008450	Nutf2	nuclear transport factor 2	-0.320661	1.93261	0	0.97493	1	unchanged
ENSMUSG00000008475	Arpc5	actin related protein 2/3 complex, subunit 5	0.617461	6.88106	0	0.999004	1	unchanged
ENSMUSG00000008496	Pou2f2	POU domain, class 2, transcription factor 2	2.72723	4.99526	4.97878	4.39994e-05	0.00192523	upreg
ENSMUSG00000008540	Mgst1	microsomal glutathione S-transferase 1	-0.749591	10.9765	0	0.965243	1	unchanged
ENSMUSG00000008575	Nfib	nuclear factor I/B	-0.667495	7.36426	0	0.993806	1	unchanged
ENSMUSG00000008604	Ubqln4	ubiquilin 4	-0.38482	3.92566	0	0.995865	1	unchanged
ENSMUSG00000008668	Rps18	ribosomal protein S18	0.41137	8.06453	0	0.999919	1	unchanged
ENSMUSG00000008682	Rpl10	ribosomal protein L10	0.170625	6.65862	0	0.999893	1	unchanged
ENSMUSG00000008683	Rps15a	ribosomal protein S15A	0.596982	8.48478	0	0.998963	1	unchanged
ENSMUSG00000008690	Ncaph2	non-SMC condensin II complex, subunit H2	0.0472617	4.92685	0	1	1	unchanged
ENSMUSG00000008730	Hipk1	homeodomain interacting protein kinase 1	0.0973263	5.70907	0	1	1	unchanged
ENSMUSG00000008734	Gprc5b	G protein-coupled receptor, family C, group 5, member B	0.95752	-0.752757	0	0.553768	1	unchanged
ENSMUSG00000008763	Man1a2	mannosidase, alpha, class 1A, member 2	-0.134077	5.14574	0	0.999999	1	unchanged
ENSMUSG00000008822	Acyp1	acylphosphatase 1	-0.766561	2.59129	0	0.809461	1	unchanged
ENSMUSG00000008843	Cldn13	claudin 13	4.61018	-2.12672	2.76703	0.00641146	0.0891018	unchanged
ENSMUSG00000008845	Cd163	CD163 antigen	1.57168	3.87322	2.00241	0.0300029	0.290137	unchanged
ENSMUSG00000008855	Hdac5	histone deacetylase 5	-0.696703	4.45181	0	0.91101	1	unchanged
ENSMUSG00000008859	Rala	v-ral simian leukemia viral oncogene A (ras related)	-0.22022	6.23574	0	1	1	unchanged
ENSMUSG00000008892	Vdac3	voltage-dependent anion channel 3	-0.0363281	4.53297	0	1	1	unchanged
ENSMUSG00000008958	Vps72	vacuolar protein sorting 72	-0.252476	4.75121	0	0.999906	1	unchanged
ENSMUSG00000008976	Gabpa	GA repeat binding protein, alpha	-0.375268	2.92816	0	0.993279	1	unchanged
ENSMUSG00000008999	Bmp7	bone morphogenetic protein 7	-1.89939	-0.639523	-1.14107	0.134963	0.905425	unchanged
ENSMUSG00000009013	Dynll1	dynein light chain LC8-type 1	1.24932	5.44852	1.5494	0.0690485	0.550147	unchanged
ENSMUSG00000009030	Pdcl	phosducin-like	-0.376883	3.68152	0	0.993521	1	unchanged
ENSMUSG00000009035	Tmem184b	transmembrane protein 184b	-0.341256	3.56465	0	0.99845	1	unchanged
ENSMUSG00000009073	Nf2	neurofibromin 2	-0.303265	4.22943	0	0.999888	1	unchanged
ENSMUSG00000009076	Zmat5	zinc finger, matrin type 5	0.0627289	2.65765	0	0.998437	1	unchanged
ENSMUSG00000009079	Ewsr1	Ewing sarcoma breakpoint region 1	0.419173	4.77359	0	0.998935	1	unchanged
ENSMUSG00000009090	Ap1b1	adaptor protein complex AP-1, beta 1 subunit	0.324054	5.71738	0	0.999993	1	unchanged
ENSMUSG00000009092	Derl3	Der1-like domain family, member 3	1.42576	2.69127	0.624539	0.270996	1	unchanged
ENSMUSG00000009108	Gnat2	G protein subunit alpha transducin 2	0.590902	0.670371	0	0.825473	1	unchanged
ENSMUSG00000009112	Bcl2l13	BCL2 like 13	-0.429467	4.26843	0	0.999023	1	unchanged
ENSMUSG00000009145	Dqx1	DEAQ RNA-dependent ATPase	0.0587654	1.24961	0	0.997759	1	unchanged
ENSMUSG00000009185	Ccl8	C-C motif chemokine ligand 8	4.59567	3.46249	2.24103	0.0199651	0.210746	unchanged
ENSMUSG00000009207	Lnpk	lunapark, ER junction formation factor	0.152641	2.18818	0	0.998058	1	unchanged
ENSMUSG00000009281	Rarres2	retinoic acid receptor responder (tazarotene induced) 2	-1.06176	9.11972	-0.4153	0.341332	1	unchanged
ENSMUSG00000009291	Pttg1ip	pituitary tumor-transforming 1 interacting protein	-0.190347	8.04674	0	1	1	unchanged
ENSMUSG00000009292	Trpm2	transient receptor potential cation channel, subfamily M, member 2	3.3808	4.46656	6.05329	4.35186e-06	0.000295882	upreg
ENSMUSG00000009293	Ube2g2	ubiquitin-conjugating enzyme E2G 2	0.317155	5.19154	0	0.999717	1	unchanged
ENSMUSG00000009350	Mpo	myeloperoxidase	7.26398	-0.072024	1.97349	0.0405401	0.364393	unchanged
ENSMUSG00000009376	Met	met proto-oncogene	-0.183441	5.32258	0	0.999992	1	unchanged
ENSMUSG00000009378	Slc16a12	solute carrier family 16 (monocarboxylic acid transporters), member 12	0.327497	4.2941	0	0.995924	1	unchanged
ENSMUSG00000009406	Elk1	ELK1, member of ETS oncogene family	0.499631	2.54465	0	0.919428	1	unchanged
ENSMUSG00000009418	Nav1	neuron navigator 1	0.208149	3.27521	0	0.999572	1	unchanged
ENSMUSG00000009470	Tnpo1	transportin 1	0.178954	4.83553	0	0.99998	1	unchanged
ENSMUSG00000009535	Rnmt	RNA (guanine-7-) methyltransferase	0.177662	3.65786	0	0.999864	1	unchanged
ENSMUSG00000009545	Kcnq1	potassium voltage-gated channel, subfamily Q, member 1	0.112626	0.442196	0	0.978512	1	unchanged
ENSMUSG00000009549	Srp14	signal recognition particle 14	0.0842525	5.83774	0	1	1	unchanged
ENSMUSG00000009555	Cdk9	cyclin dependent kinase 9	0.242119	2.925	0	0.999565	1	unchanged
ENSMUSG00000009563	Tor2a	torsin family 2, member A	0.24685	5.37679	0	0.999998	1	unchanged
ENSMUSG00000009566	Fpgs	folylpolyglutamyl synthetase	-0.674328	6.57635	0	0.98952	1	unchanged
ENSMUSG00000009569	Mrtfb	myocardin related transcription factor B	-0.275743	4.49475	0	0.999598	1	unchanged
ENSMUSG00000009575	Cbx5	chromobox 5	0.371209	5.53449	0	0.999851	1	unchanged
ENSMUSG00000009585	Apobec3	apolipoprotein B mRNA editing enzyme, catalytic polypeptide 3	3.55919	4.56539	6.74166	1.06542e-06	9.8093e-05	upreg
ENSMUSG00000009614	Sardh	sarcosine dehydrogenase	-0.998337	8.55137	0	0.506904	1	unchanged
ENSMUSG00000009621	Vav2	vav 2 oncogene	0.277698	4.57465	0	0.999896	1	unchanged
ENSMUSG00000009630	Ppp2cb	protein phosphatase 2 (formerly 2A), catalytic subunit, beta isoform	0.0776645	5.23376	0	0.999985	1	unchanged
ENSMUSG00000009633	G0s2	G0/G1 switch gene 2	-1.12543	5.05179	-0.247808	0.403748	1	unchanged
ENSMUSG00000009640	Dmap1	DNA methyltransferase 1-associated protein 1	-0.364111	2.9406	0	0.993956	1	unchanged
ENSMUSG00000009646	Pla2g12b	phospholipase A2, group XIIB	0.0340273	5.99683	0	1	1	unchanged
ENSMUSG00000009647	Mcu	mitochondrial calcium uniporter	-1.17462	5.02112	-1.01439	0.161691	1	unchanged
ENSMUSG00000009654	Oit3	oncoprotein induced transcript 3	0.0295362	4.38385	0	0.999996	1	unchanged
ENSMUSG00000009681	Bcr	BCR activator of RhoGEF and GTPase	-0.407904	4.31288	0	0.999377	1	unchanged
ENSMUSG00000009687	Fxyd5	FXYD domain-containing ion transport regulator 5	3.30002	4.47695	7.19479	4.3674e-07	4.90704e-05	upreg
ENSMUSG00000009733	Tfcp2	transcription factor CP2	-0.110304	1.59705	0	0.991399	1	unchanged
ENSMUSG00000009739	Pou6f1	POU domain, class 6, transcription factor 1	0.494055	1.63465	0	0.938665	1	unchanged
ENSMUSG00000009741	Ubp1	upstream binding protein 1	-0.274057	5.45723	0	0.999996	1	unchanged
ENSMUSG00000009772	Nuak2	NUAK family, SNF1-like kinase, 2	1.3447	4.14216	1.34175	0.0978981	0.712367	unchanged
ENSMUSG00000009828	Cilk1	ciliogenesis associated kinase 1	-0.799786	3.34485	0	0.848041	1	unchanged
ENSMUSG00000009863	Sdhb	succinate dehydrogenase complex, subunit B, iron sulfur (Ip)	-0.966576	8.41006	0	0.614682	1	unchanged
ENSMUSG00000009894	Snap47	synaptosomal-associated protein, 47	-0.152748	6.46106	0	0.999997	1	unchanged
ENSMUSG00000009905	Kdsr	3-ketodihydrosphingosine reductase	-0.498045	4.63888	0	0.998075	1	unchanged
ENSMUSG00000009907	Vps4b	vacuolar protein sorting 4B	0.0274645	5.7987	0	1	1	unchanged
ENSMUSG00000009927	Rps25	ribosomal protein S25	0.154925	8.94565	0	1	1	unchanged
ENSMUSG00000009995	Tafazzin	tafazzin, phospholipid-lysophospholipid transacylase	-0.319725	4.61418	0	0.999966	1	unchanged
ENSMUSG00000010025	Aldh3a2	aldehyde dehydrogenase family 3, subfamily A2	-2.34094	5.95177	-6.09929	3.95313e-06	0.00028027	downreg
ENSMUSG00000010045	Tmem115	transmembrane protein 115	-0.0982722	3.88514	0	0.999996	1	unchanged
ENSMUSG00000010047	Hyal2	hyaluronoglucosaminidase 2	0.101838	4.57609	0	0.99979	1	unchanged
ENSMUSG00000010048	Ifrd2	interferon-related developmental regulator 2	-0.108496	3.20595	0	0.99978	1	unchanged
ENSMUSG00000010051	Hyal1	hyaluronoglucosaminidase 1	-0.730133	4.72379	0	0.961737	1	unchanged
ENSMUSG00000010054	Tusc2	tumor suppressor 2, mitochondrial calcium regulator	-0.292451	5.48735	0	0.999985	1	unchanged
ENSMUSG00000010057	Nprl2	NPR2 like, GATOR1 complex subunit	-0.695365	3.57254	0	0.949107	1	unchanged
ENSMUSG00000010064	Slc38a3	solute carrier family 38, member 3	-0.116162	8.80681	0	1	1	unchanged
ENSMUSG00000010067	Rassf1	Ras association (RalGDS/AF-6) domain family member 1	1.00411	3.99309	0.0212401	0.49164	1	unchanged
ENSMUSG00000010095	Slc3a2	solute carrier family 3 (activators of dibasic and neutral amino acid transport), member 2	0.426125	6.16918	0	0.999845	1	unchanged
ENSMUSG00000010097	Nxf1	nuclear RNA export factor 1	-0.0570344	5.21674	0	1	1	unchanged
ENSMUSG00000010110	Stx5a	syntaxin 5A	-0.142159	5.55687	0	0.999998	1	unchanged
ENSMUSG00000010122	Slc47a1	solute carrier family 47, member 1	-1.17082	6.12965	-0.876429	0.195976	1	unchanged
ENSMUSG00000010142	Tnfrsf13b	tumor necrosis factor receptor superfamily, member 13b	4.42179	0.664788	2.62007	0.0087916	0.113716	unchanged
ENSMUSG00000010175	Prox1	prospero homeobox 1	0.38385	7.03621	0	0.990202	1	unchanged
ENSMUSG00000010205	Raver1	ribonucleoprotein, PTB-binding 1	0.183619	2.31923	0	0.967535	1	unchanged
ENSMUSG00000010277	Bltp2	bridge-like lipid transfer protein family member 2	-0.442686	5.79084	0	0.99994	1	unchanged
ENSMUSG00000010290	AI597479	expressed sequence AI597479	-0.639267	2.36773	0	0.889802	1	unchanged
ENSMUSG00000010307	Tmem86a	transmembrane protein 86A	1.98668	4.62256	3.32825	0.00180222	0.0334179	upreg
ENSMUSG00000010342	Tex14	testis expressed gene 14 intercellular bridge forming factor	2.38247	-0.379902	1.53974	0.0708837	0.561982	unchanged
ENSMUSG00000010358	Ifi35	interferon-induced protein 35	0.546549	4.56873	0	0.982608	1	unchanged
ENSMUSG00000010362	Rdm1	RAD52 motif 1	-0.943323	2.56528	0	0.586431	1	unchanged
ENSMUSG00000010376	Nedd8	neural precursor cell expressed, developmentally down-regulated gene 8	0.016321	7.54413	0	1	1	unchanged
ENSMUSG00000010392	Gosr1	golgi SNAP receptor complex member 1	0.773438	1.95191	0	0.73707	1	unchanged
ENSMUSG00000010406	Mrpl52	mitochondrial ribosomal protein L52	-0.197528	6.78095	0	1	1	unchanged
ENSMUSG00000010453	Kansl3	KAT8 regulatory NSL complex subunit 3	-0.0566269	5.29246	0	0.999999	1	unchanged
ENSMUSG00000010517	Faf1	Fas-associated factor 1	-0.293773	4.79407	0	0.999928	1	unchanged
ENSMUSG00000010538	Tsacc	TSSK6 activating co-chaperone	-0.102749	1.75902	0	0.997623	1	unchanged
ENSMUSG00000010554	Mettl16	methyltransferase 16, N6-methyladenosine	-0.0344804	4.17308	0	0.999969	1	unchanged
ENSMUSG00000010601	Apol7a	apolipoprotein L 7a	-0.389118	6.92812	0	0.985635	1	unchanged
ENSMUSG00000010607	Pigyl	phosphatidylinositol glycan anchor biosynthesis, class Y-like	-0.417026	4.72528	0	0.999857	1	unchanged
ENSMUSG00000010608	Rbm25	RNA binding motif protein 25	-0.0371712	7.64827	0	1	1	unchanged
ENSMUSG00000010609	Psen2	presenilin 2	-1.04874	8.90958	-0.306971	0.381134	1	unchanged
ENSMUSG00000010651	Acaa1b	acetyl-Coenzyme A acyltransferase 1B	-4.93211	7.62913	-19.6231	3.32102e-14	1.13054e-10	downreg
ENSMUSG00000010660	Plcd1	phospholipase C, delta 1	1.18405	-0.00863789	0.24018	0.411593	1	unchanged
ENSMUSG00000010663	Fads1	fatty acid desaturase 1	-1.64324	7.58289	-4.10282	0.000313498	0.00888109	downreg
ENSMUSG00000010721	Lmbr1	limb region 1	-0.0351809	2.2407	0	0.999639	1	unchanged
ENSMUSG00000010751	Tnfrsf22	tumor necrosis factor receptor superfamily, member 22	1.76209	-0.815872	0.759838	0.234816	1	unchanged
ENSMUSG00000010755	Cars1	cysteinyl-tRNA synthetase 1	-0.115793	4.14511	0	0.999956	1	unchanged
ENSMUSG00000010760	Phlda2	pleckstrin homology like domain, family A, member 2	-1.18339	0.604938	-0.202697	0.433929	1	unchanged
ENSMUSG00000010797	Wnt2	wingless-type MMTV integration site family, member 2	-0.245704	1.62537	0	0.96235	1	unchanged
ENSMUSG00000010911	Apip	APAF1 interacting protein	-0.0258031	4.40046	0	0.999999	1	unchanged
ENSMUSG00000010914	Pdhx	pyruvate dehydrogenase complex, component X	-0.666621	4.71739	0	0.956525	1	unchanged
ENSMUSG00000010936	Vac14	Vac14 homolog (S. cerevisiae)	-0.0923141	3.32325	0	0.999861	1	unchanged
ENSMUSG00000011008	Mcoln2	mucolipin 2	4.22236	0.213323	3.11258	0.0029523	0.0491728	upreg
ENSMUSG00000011034	Slc5a1	solute carrier family 5 (sodium/glucose cotransporter), member 1	-0.325945	0.200812	0	0.917065	1	unchanged
ENSMUSG00000011096	Akt1s1	AKT1 substrate 1	-0.26921	2.10255	0	0.990704	1	unchanged
ENSMUSG00000011114	Tbrg1	transforming growth factor beta regulated gene 1	0.237014	5.00495	0	0.99961	1	unchanged
ENSMUSG00000011148	Adss1	adenylosuccinate synthase 1	-0.489969	2.83765	0	0.938927	1	unchanged
ENSMUSG00000011158	Brf1	BRF1, RNA polymerase III transcription initiation factor 90 kDa subunit	0.201684	3.18892	0	0.999825	1	unchanged
ENSMUSG00000011179	Odc1	ornithine decarboxylase, structural 1	-0.533855	2.90675	0	0.975716	1	unchanged
ENSMUSG00000011254	Thg1l	tRNA-histidine guanylyltransferase 1-like (S. cerevisiae)	0.0840131	0.544337	0	0.983291	1	unchanged
ENSMUSG00000011256	Adam19	ADAM metallopeptidase domain 19	1.85863	1.62844	1.91747	0.0353188	0.328853	unchanged
ENSMUSG00000011257	Pabpc4	poly(A) binding protein, cytoplasmic 4	-0.107421	6.6223	0	0.999998	1	unchanged
ENSMUSG00000011263	Exoc3l2	exocyst complex component 3-like 2	0.488971	2.33106	0	0.949002	1	unchanged
ENSMUSG00000011305	Plin5	perilipin 5	-0.729782	5.24817	0	0.919693	1	unchanged
ENSMUSG00000011306	Sugp1	SURP and G patch domain containing 1	0.565457	3.21621	0	0.947441	1	unchanged
ENSMUSG00000011382	Dhdh	dihydrodiol dehydrogenase	-0.897847	4.28076	0	0.72794	1	unchanged
ENSMUSG00000011427	Zfp790	zinc finger protein 790	-0.0937593	0.978945	0	0.99483	1	unchanged
ENSMUSG00000011658	Fuz	fuzzy planar cell polarity protein	-0.755011	2.06744	0	0.810875	1	unchanged
ENSMUSG00000011752	Pgam1	phosphoglycerate mutase 1	-0.476808	2.22318	0	0.936148	1	unchanged
ENSMUSG00000011831	Evi5	ecotropic viral integration site 5	-0.63533	6.63697	0	0.996088	1	unchanged
ENSMUSG00000011832	Evi5l	ecotropic viral integration site 5 like	0.0615564	1.83712	0	0.997967	1	unchanged
ENSMUSG00000011837	Snapc2	small nuclear RNA activating complex, polypeptide 2	0.145684	3.09863	0	0.99956	1	unchanged
ENSMUSG00000011877	Git1	GIT ArfGAP 1	0.0810564	3.08062	0	0.999449	1	unchanged
ENSMUSG00000011884	Gltp	glycolipid transfer protein	2.03198	4.03705	3.25953	0.00210155	0.037399	upreg
ENSMUSG00000011958	Bnip2	BCL2/adenovirus E1B interacting protein 2	0.586505	6.5427	0	0.997442	1	unchanged
ENSMUSG00000011960	Ccnt1	cyclin T1	-0.0510225	5.23189	0	1	1	unchanged
ENSMUSG00000012017	Scarf2	scavenger receptor class F, member 2	0.388877	1.27975	0	0.975133	1	unchanged
ENSMUSG00000012076	Brms1l	breast cancer metastasis-suppressor 1-like	-0.101142	0.199014	0	0.96394	1	unchanged
ENSMUSG00000012114	Med15	mediator complex subunit 15	0.596975	4.75431	0	0.991536	1	unchanged
ENSMUSG00000012117	Dhdds	dehydrodolichyl diphosphate synthase	-0.130595	4.57508	0	0.999999	1	unchanged
ENSMUSG00000012123	Crybg2	crystallin beta-gamma domain containing 2	-0.625644	0.220112	0	0.741557	1	unchanged
ENSMUSG00000012296	Tjap1	tight junction associated protein 1	-0.271437	2.40357	0	0.987435	1	unchanged
ENSMUSG00000012405	Rpl15	ribosomal protein L15	-0.172692	4.67728	0	0.999994	1	unchanged
ENSMUSG00000012422	Tmem167	transmembrane protein 167	0.319503	6.31244	0	0.999999	1	unchanged
ENSMUSG00000012428	Steap4	STEAP family member 4	3.38336	7.28706	7.28465	3.67172e-07	4.30794e-05	upreg
ENSMUSG00000012429	Mplkip	M-phase specific PLK1 intereacting protein	0.160314	3.70421	0	0.99996	1	unchanged
ENSMUSG00000012443	Kif11	kinesin family member 11	3.11196	0.716056	2.81083	0.00566399	0.0815262	unchanged
ENSMUSG00000012483	Rpa3	replication protein A3	-0.950957	-0.163802	0	0.535132	1	unchanged
ENSMUSG00000012519	Mlkl	mixed lineage kinase domain-like	2.14641	3.29091	3.08214	0.00311739	0.0514059	unchanged
ENSMUSG00000012535	Tnpo3	transportin 3	-0.138243	6.06935	0	0.999999	1	unchanged
ENSMUSG00000012609	Ttll5	tubulin tyrosine ligase-like family, member 5	-0.209648	2.14544	0	0.986602	1	unchanged
ENSMUSG00000012640	Zfp715	zinc finger protein 715	0.382794	3.02913	0	0.990839	1	unchanged
ENSMUSG00000012705	Retn	resistin	0.0651684	0.142584	0	0.969398	1	unchanged
ENSMUSG00000012848	Rps5	ribosomal protein S5	0.11102	8.82284	0	1	1	unchanged
ENSMUSG00000012889	Podnl1	podocan-like 1	2.911	0.211512	2.23357	0.0190978	0.204523	unchanged
ENSMUSG00000013033	Adgrl1	adhesion G protein-coupled receptor L1	0.257535	3.06584	0	0.998294	1	unchanged
ENSMUSG00000013076	Amotl1	angiomotin-like 1	-0.228058	4.4883	0	0.999953	1	unchanged
ENSMUSG00000013089	Etv5	ets variant 5	1.28855	2.91322	0.897533	0.190441	1	unchanged
ENSMUSG00000013150	Gfod2	glucose-fructose oxidoreductase domain containing 2	-0.428712	1.46413	0	0.947245	1	unchanged
ENSMUSG00000013155	Enkd1	enkurin domain containing 1	0.409599	0.225935	0	0.885703	1	unchanged
ENSMUSG00000013160	Atp6v0d1	ATPase, H+ transporting, lysosomal V0 subunit D1	0.097349	5.67858	0	1	1	unchanged
ENSMUSG00000013236	Ptprs	protein tyrosine phosphatase receptor type S	-0.15245	1.24162	0	0.990632	1	unchanged
ENSMUSG00000013275	Slc41a1	solute carrier family 41, member 1	1.16411	2.39224	0.427283	0.337045	1	unchanged
ENSMUSG00000013419	Zbtb47	zinc finger and BTB domain containing 47	0.856167	-0.670307	0	0.588138	1	unchanged
ENSMUSG00000013465	Nelfb	negative elongation factor complex member B	-0.419101	3.92769	0	0.998621	1	unchanged
ENSMUSG00000013495	Tmem175	transmembrane protein 175	0.130137	3.65342	0	0.999867	1	unchanged
ENSMUSG00000013539	Tango2	transport and golgi organization 2	0.339358	5.53665	0	0.999992	1	unchanged
ENSMUSG00000013593	Ndufs2	NADH:ubiquinone oxidoreductase core subunit S2	-0.727912	7.21105	0	0.991973	1	unchanged
ENSMUSG00000013622	Atraid	all-trans retinoic acid induced differentiation factor	-0.0985228	6.8434	0	0.999999	1	unchanged
ENSMUSG00000013629	Cad	carbamoyl-phosphate synthetase 2, aspartate transcarbamylase, and dihydroorotase	0.109092	3.62709	0	0.999926	1	unchanged
ENSMUSG00000013646	Sh3bp5l	SH3 binding domain protein 5 like	-0.0316807	4.02751	0	0.999986	1	unchanged
ENSMUSG00000013662	Atad1	ATPase family, AAA domain containing 1	-0.288851	5.46611	0	0.999997	1	unchanged
ENSMUSG00000013663	Pten	phosphatase and tensin homolog	-0.294689	5.68263	0	0.999995	1	unchanged
ENSMUSG00000013698	Pea15a	proliferation and apoptosis adaptor protein 15A	0.197548	5.1942	0	0.999995	1	unchanged
ENSMUSG00000013701	Timm23	translocase of inner mitochondrial membrane 23	-0.675932	0.62195	0	0.758373	1	unchanged
ENSMUSG00000013707	Tnfaip8l2	tumor necrosis factor, alpha-induced protein 8-like 2	2.86863	2.52203	4.14654	0.000284011	0.00827564	upreg
ENSMUSG00000013736	Trnt1	tRNA nucleotidyl transferase, CCA-adding, 1	-0.238737	2.35995	0	0.996961	1	unchanged
ENSMUSG00000013787	Ehmt2	euchromatic histone lysine N-methyltransferase 2	0.470781	4.56551	0	0.998043	1	unchanged
ENSMUSG00000013822	Elof1	ELF1 homolog, elongation factor 1	-0.20862	5.15192	0	0.999999	1	unchanged
ENSMUSG00000013833	Med16	mediator complex subunit 16	0.335027	3.52793	0	0.999707	1	unchanged
ENSMUSG00000013846	St3gal1	ST3 beta-galactoside alpha-2,3-sialyltransferase 1	-0.0833218	6.56386	0	0.999997	1	unchanged
ENSMUSG00000013858	Tmem259	transmembrane protein 259	-0.12047	4.69019	0	0.999995	1	unchanged
ENSMUSG00000013878	Rnf170	ring finger protein 170	-0.125376	2.9768	0	0.999874	1	unchanged
ENSMUSG00000013921	Clip3	CAP-GLY domain containing linker protein 3	0.642115	-0.518484	0	0.696126	1	unchanged
ENSMUSG00000013973	Dedd	death effector domain-containing	-0.172214	4.5986	0	0.999993	1	unchanged
ENSMUSG00000013974	Mcemp1	mast cell expressed membrane protein 1	4.96922	1.0349	3.81618	0.000608324	0.014853	upreg
ENSMUSG00000013997	Nit1	nitrilase 1	-0.296357	5.25573	0	0.999979	1	unchanged
ENSMUSG00000014039	Prdm15	PR domain containing 15	0.284369	1.60954	0	0.97993	1	unchanged
ENSMUSG00000014074	Rnf168	ring finger protein 168	-0.0597192	4.57688	0	0.999997	1	unchanged
ENSMUSG00000014075	Dynlt2b	dynein light chain Tctex-type 2B	0.533449	1.62136	0	0.879366	1	unchanged
ENSMUSG00000014077	Chp1	calcineurin-like EF hand protein 1	-0.317495	7.74153	0	0.999986	1	unchanged
ENSMUSG00000014177	Tvp23b	trans-golgi network vesicle protein 23B	0.0391765	4.58356	0	1	1	unchanged
ENSMUSG00000014195	Dnajc7	DnaJ heat shock protein family (Hsp40) member C7	0.00756493	5.02959	0	1	1	unchanged
ENSMUSG00000014226	Cacybp	calcyclin binding protein	-0.467954	5.26796	0	0.999191	1	unchanged
ENSMUSG00000014232	Cluap1	clusterin associated protein 1	0.0507298	2.66583	0	0.999902	1	unchanged
ENSMUSG00000014243	Zswim7	zinc finger SWIM-type containing 7	-0.483763	2.75241	0	0.977358	1	unchanged
ENSMUSG00000014245	Pigl	phosphatidylinositol glycan anchor biosynthesis, class L	0.0473183	0.907872	0	0.991459	1	unchanged
ENSMUSG00000014294	Ndufa2	NADH:ubiquinone oxidoreductase subunit A2	-0.237116	8.57041	0	1	1	unchanged
ENSMUSG00000014301	Pam16	presequence translocase-asssociated motor 16	-0.30677	4.63641	0	0.999945	1	unchanged
ENSMUSG00000014303	Glis2	GLIS family zinc finger 2	0.0723915	-0.147884	0	0.973266	1	unchanged
ENSMUSG00000014313	Cox6c	cytochrome c oxidase subunit 6C	-0.679551	9.17672	0	0.991812	1	unchanged
ENSMUSG00000014329	Bicc1	BicC family RNA binding protein 1	0.142586	3.18284	0	0.9994	1	unchanged
ENSMUSG00000014349	Ube2z	ubiquitin-conjugating enzyme E2Z	0.0122031	4.72695	0	1	1	unchanged
ENSMUSG00000014353	Tmem87b	transmembrane protein 87B	0.904388	5.74025	0	0.744346	1	unchanged
ENSMUSG00000014355	Anapc1	anaphase promoting complex subunit 1	0.00821938	4.10301	0	1	1	unchanged
ENSMUSG00000014361	Mertk	MER proto-oncogene tyrosine kinase	1.74299	6.08363	4.47394	0.000135687	0.00464842	upreg
ENSMUSG00000014402	Tsg101	tumor susceptibility gene 101	-0.204818	4.30241	0	0.999997	1	unchanged
ENSMUSG00000014418	Hps5	HPS5, biogenesis of lysosomal organelles complex 2 subunit 2	0.50362	3.16751	0	0.993473	1	unchanged
ENSMUSG00000014426	Map3k4	mitogen-activated protein kinase kinase kinase 4	-0.197488	3.98522	0	0.999737	1	unchanged
ENSMUSG00000014444	Piezo1	piezo-type mechanosensitive ion channel component 1	0.997949	3.41689	0	0.502861	1	unchanged
ENSMUSG00000014470	Rnf166	ring finger protein 166	0.587976	3.49391	0	0.982736	1	unchanged
ENSMUSG00000014496	Ankrd28	ankyrin repeat domain 28	0.341662	1.90695	0	0.981229	1	unchanged
ENSMUSG00000014498	Ankrd52	ankyrin repeat domain 52	-0.137915	0.62076	0	0.961426	1	unchanged
ENSMUSG00000014504	Srp19	signal recognition particle 19	0.26399	5.68839	0	0.999999	1	unchanged
ENSMUSG00000014542	Clec4f	C-type lectin domain family 4, member f	1.7357	5.99638	3.03214	0.00348135	0.0559812	unchanged
ENSMUSG00000014550	Rbsn	rabenosyn, RAB effector	0.269462	2.71525	0	0.994119	1	unchanged
ENSMUSG00000014551	Mrps25	mitochondrial ribosomal protein S25	-0.180008	4.49161	0	0.999998	1	unchanged
ENSMUSG00000014554	Dguok	deoxyguanosine kinase	0.158521	4.46185	0	0.999953	1	unchanged
ENSMUSG00000014592	Camta1	calmodulin binding transcription activator 1	0.0606838	2.36364	0	0.999829	1	unchanged
ENSMUSG00000014599	Csf1	colony stimulating factor 1 (macrophage)	1.7339	3.63554	2.59226	0.00902864	0.115772	unchanged
ENSMUSG00000014601	Strip1	striatin interacting protein 1	-0.0769972	4.38537	0	0.999998	1	unchanged
ENSMUSG00000014606	Slc25a11	solute carrier family 25 (mitochondrial carrier oxoglutarate carrier), member 11	-0.530565	6.11816	0	0.99946	1	unchanged
ENSMUSG00000014633	Cmc2	C-X9-C motif containing 2	-0.0825995	4.26128	0	0.999953	1	unchanged
ENSMUSG00000014668	Chfr	checkpoint with forkhead and ring finger domains	0.220474	3.56746	0	0.999064	1	unchanged
ENSMUSG00000014748	Tex261	testis expressed gene 261	-0.0977037	6.72533	0	1	1	unchanged
ENSMUSG00000014763	Fam120b	family with sequence similarity 120, member B	0.253772	3.20945	0	0.996934	1	unchanged
ENSMUSG00000014767	Tbp	TATA box binding protein	-0.0664519	2.673	0	0.999287	1	unchanged
ENSMUSG00000014769	Psmb1	proteasome (prosome, macropain) subunit, beta type 1	-0.0467541	7.88158	0	1	1	unchanged
ENSMUSG00000014771	Pdcd2	programmed cell death 2	-0.599828	3.71069	0	0.971497	1	unchanged
ENSMUSG00000014773	Dll1	delta like canonical Notch ligand 1	0.256815	-0.34077	0	0.883585	1	unchanged
ENSMUSG00000014776	Nol3	nucleolar protein 3 (apoptosis repressor with CARD domain)	1.30697	1.60164	0.713566	0.242186	1	unchanged
ENSMUSG00000014778	Fhod1	formin homology 2 domain containing 1	0.496443	2.72626	0	0.947182	1	unchanged
ENSMUSG00000014791	Elmo3	engulfment and cell motility 3	-0.441167	2.83484	0	0.981599	1	unchanged
ENSMUSG00000014813	Stc1	stanniocalcin 1	1.35342	0.15327	0.382969	0.362907	1	unchanged
ENSMUSG00000014837	Matcap1	microtubule associated tyrosine carboxypeptidase 1	-0.446285	0.323781	0	0.826852	1	unchanged
ENSMUSG00000014846	Tppp3	tubulin polymerization-promoting protein family member 3	-0.030405	-0.0174685	0	0.985717	1	unchanged
ENSMUSG00000014850	Msh3	mutS homolog 3	-0.286945	3.41939	0	0.999572	1	unchanged
ENSMUSG00000014856	Tmem208	transmembrane protein 208	-0.24951	5.185	0	0.999996	1	unchanged
ENSMUSG00000014859	E2f4	E2F transcription factor 4	0.273724	3.74659	0	0.998484	1	unchanged
ENSMUSG00000014867	Surf4	surfeit gene 4	0.164654	7.79077	0	1	1	unchanged
ENSMUSG00000014873	Surf2	surfeit gene 2	0.472279	3.62217	0	0.988912	1	unchanged
ENSMUSG00000014905	Dnajb9	DnaJ heat shock protein family (Hsp40) member B9	-0.0109038	5.2214	0	0.999983	1	unchanged
ENSMUSG00000014907	Naf1	nuclear assembly factor 1 ribonucleoprotein	0.121896	2.6721	0	0.999423	1	unchanged
ENSMUSG00000014932	Yes1	YES proto-oncogene 1, Src family tyrosine kinase	-0.280923	2.28244	0	0.993219	1	unchanged
ENSMUSG00000014956	Ppp1cb	protein phosphatase 1 catalytic subunit beta	-0.282192	5.88299	0	0.999917	1	unchanged
ENSMUSG00000014959	Gorasp2	golgi reassembly stacking protein 2	0.113123	6.48559	0	1	1	unchanged
ENSMUSG00000014980	Tsen15	tRNA splicing endonuclease subunit 15	-0.282849	2.7136	0	0.997983	1	unchanged
ENSMUSG00000015002	Efr3a	EFR3 homolog A	-0.076002	5.83677	0	1	1	unchanged
ENSMUSG00000015013	Trappc2l	trafficking protein particle complex 2L	0.380522	4.94368	0	0.999983	1	unchanged
ENSMUSG00000015016	Acsf3	acyl-CoA synthetase family member 3	-0.664337	3.43538	0	0.953354	1	unchanged
ENSMUSG00000015023	Ddx19a	DEAD box helicase 19a	-0.0160674	3.6715	0	0.999983	1	unchanged
ENSMUSG00000015027	Galns	galactosamine (N-acetyl)-6-sulfatase	1.0277	2.59338	0.0815386	0.467947	1	unchanged
ENSMUSG00000015053	Gata2	GATA binding protein 2	0.446812	0.373479	0	0.854909	1	unchanged
ENSMUSG00000015083	C8g	complement component 8, gamma polypeptide	-1.39524	8.04554	-3.27514	0.00202954	0.0364603	downreg
ENSMUSG00000015085	Entpd2	ectonucleoside triphosphate diphosphohydrolase 2	0.0489213	1.73762	0	0.99164	1	unchanged
ENSMUSG00000015087	Rabl6	RAB, member RAS oncogene family-like 6	0.166664	5.40466	0	0.999978	1	unchanged
ENSMUSG00000015090	Ptgds	prostaglandin D2 synthase (brain)	-3.60814	1.30119	-2.74491	0.00657281	0.0911531	unchanged
ENSMUSG00000015092	Edf1	endothelial differentiation-related factor 1	-0.329103	7.94228	0	0.999941	1	unchanged
ENSMUSG00000015094	Npdc1	neural proliferation, differentiation and control 1	0.729424	2.52926	0	0.829203	1	unchanged
ENSMUSG00000015095	Fbxw5	F-box and WD-40 domain protein 5	-0.234304	3.63337	0	0.99991	1	unchanged
ENSMUSG00000015112	Slc25a13	solute carrier family 25 (mitochondrial carrier, adenine nucleotide translocator), member 13	-0.680264	7.04351	0	0.96458	1	unchanged
ENSMUSG00000015120	Ube2i	ubiquitin-conjugating enzyme E2I	0.440899	0.0754476	0	0.862375	1	unchanged
ENSMUSG00000015126	Tsr3	TSR3 20S rRNA accumulation	-0.168023	4.71895	0	0.999999	1	unchanged
ENSMUSG00000015127	Unkl	unkempt family like zinc finger	-0.473759	1.44749	0	0.878013	1	unchanged
ENSMUSG00000015133	Lrrk1	leucine-rich repeat kinase 1	1.05014	4.53952	0.329371	0.372774	1	unchanged
ENSMUSG00000015143	Actn1	actinin, alpha 1	0.935327	6.41755	0	0.661183	1	unchanged
ENSMUSG00000015149	Sirt2	sirtuin 2	-0.0240487	5.47277	0	1	1	unchanged
ENSMUSG00000015165	Hnrnpl	heterogeneous nuclear ribonucleoprotein L	-0.0417811	4.96575	0	0.999999	1	unchanged
ENSMUSG00000015176	Nolc1	nucleolar and coiled-body phosphoprotein 1	0.169781	4.62895	0	0.999953	1	unchanged
ENSMUSG00000015189	Casd1	CAS1 domain containing 1	-0.468671	3.67941	0	0.996978	1	unchanged
ENSMUSG00000015202	Cnksr3	Cnksr family member 3	-0.774052	2.16458	0	0.800477	1	unchanged
ENSMUSG00000015214	Mtmr1	myotubularin related protein 1	-0.288801	3.44785	0	0.999731	1	unchanged
ENSMUSG00000015217	Hmgb3	high mobility group box 3	-0.0328903	3.50409	0	0.999964	1	unchanged
ENSMUSG00000015222	Map2	microtubule-associated protein 2	-0.169054	0.0388065	0	0.94496	1	unchanged
ENSMUSG00000015224	Cyp2j9	cytochrome P450, family 2, subfamily j, polypeptide 9	-0.751422	1.40784	0	0.759933	1	unchanged
ENSMUSG00000015243	Abca1	ATP-binding cassette, sub-family A member 1	0.1949	6.68436	0	0.99997	1	unchanged
ENSMUSG00000015247	Nipsnap3b	nipsnap homolog 3B	-0.167943	5.53094	0	0.999963	1	unchanged
ENSMUSG00000015289	Lage3	L antigen family, member 3	-0.257201	4.86589	0	0.999946	1	unchanged
ENSMUSG00000015290	Ubl4a	ubiquitin-like 4A	0.00342603	5.53751	0	1	1	unchanged
ENSMUSG00000015291	Gdi1	GDP dissociation inhibitor 1	-0.436599	4.50724	0	0.999563	1	unchanged
ENSMUSG00000015305	Sash1	SAM and SH3 domain containing 1	0.43177	5.2598	0	0.999675	1	unchanged
ENSMUSG00000015312	Gadd45b	growth arrest and DNA-damage-inducible 45 beta	2.76769	2.09783	3.33671	0.00176891	0.0331245	upreg
ENSMUSG00000015314	Slamf6	SLAM family member 6	4.3791	1.31724	4.22955	0.000236473	0.00734698	upreg
ENSMUSG00000015316	Slamf1	signaling lymphocytic activation molecule family member 1	3.49033	-0.535218	2.76195	0.00632303	0.088288	unchanged
ENSMUSG00000015335	Zdhhc12	zinc finger, DHHC domain containing 12	-0.0290346	4.49016	0	0.999998	1	unchanged
ENSMUSG00000015337	Endog	endonuclease G	-0.574487	5.40927	0	0.99652	1	unchanged
ENSMUSG00000015340	Cybb	cytochrome b-245, beta polypeptide	3.17959	6.90312	11.4018	3.82065e-10	1.333e-07	upreg
ENSMUSG00000015341	Golga7	golgin A7	-0.125652	2.88463	0	0.999719	1	unchanged
ENSMUSG00000015342	Xk	X-linked Kx blood group	-0.0810143	2.14271	0	0.989977	1	unchanged
ENSMUSG00000015354	Pcolce2	procollagen C-endopeptidase enhancer 2	0.990885	2.22853	0	0.51164	1	unchanged
ENSMUSG00000015355	Cd48	CD48 antigen	2.64775	3.03887	4.34129	0.000182921	0.00594405	upreg
ENSMUSG00000015357	Clpx	caseinolytic mitochondrial matrix peptidase chaperone subunit	-1.17795	6.22075	-0.952428	0.176534	1	unchanged
ENSMUSG00000015363	Trabd	TraB domain containing	-0.361594	6.47381	0	0.99989	1	unchanged
ENSMUSG00000015377	Dennd6b	DENN domain containing 6B	-0.288405	1.46959	0	0.992205	1	unchanged
ENSMUSG00000015396	Cd83	CD83 antigen	0.446288	1.59429	0	0.881041	1	unchanged
ENSMUSG00000015437	Gzmb	granzyme B	5.83064	2.11464	4.0775	0.000339959	0.00942923	upreg
ENSMUSG00000015451	C4a	complement C4A (Rodgers blood group)	0.445116	3.29098	0	0.938799	1	unchanged
ENSMUSG00000015461	Atf6b	activating transcription factor 6 beta	0.138648	5.22812	0	0.999999	1	unchanged
ENSMUSG00000015467	Egfl8	EGF-like domain 8	0.720659	1.03948	0	0.703912	1	unchanged
ENSMUSG00000015468	Notch4	notch 4	0.127932	1.3908	0	0.985753	1	unchanged
ENSMUSG00000015474	Ppt2	palmitoyl-protein thioesterase 2	0.5897	4.93712	0	0.989649	1	unchanged
ENSMUSG00000015478	Rnf5	ring finger protein 5	-1.24889	2.52156	-0.848887	0.203357	1	unchanged
ENSMUSG00000015488	Cacfd1	calcium channel flower domain containing 1	-0.185313	5.23795	0	0.999998	1	unchanged
ENSMUSG00000015501	Hivep2	human immunodeficiency virus type I enhancer binding protein 2	0.205213	3.48381	0	0.995402	1	unchanged
ENSMUSG00000015522	Arnt	aryl hydrocarbon receptor nuclear translocator	0.0593023	4.06603	0	0.999997	1	unchanged
ENSMUSG00000015536	Mocs2	molybdenum cofactor synthesis 2	-0.0287493	6.76531	0	1	1	unchanged
ENSMUSG00000015542	Nat9	N-acetyltransferase 9 (GCN5-related, putative)	0.0517904	3.72011	0	0.999904	1	unchanged
ENSMUSG00000015568	Lpl	lipoprotein lipase	0.654305	7.40965	0	0.93563	1	unchanged
ENSMUSG00000015575	Atp6v0e	ATPase, H+ transporting, lysosomal V0 subunit E	0.591963	6.77056	0	0.999327	1	unchanged
ENSMUSG00000015597	Zfp318	zinc finger protein 318	-0.00488612	4.95125	0	1	1	unchanged
ENSMUSG00000015605	Srf	serum response factor	0.488766	3.85474	0	0.966048	1	unchanged
ENSMUSG00000015619	Gata3	GATA binding protein 3	1.29116	0.204787	0.384466	0.356026	1	unchanged
ENSMUSG00000015647	Lama5	laminin, alpha 5	0.880205	0.693496	0	0.592816	1	unchanged
ENSMUSG00000015652	Steap1	six transmembrane epithelial antigen of the prostate 1	0.0489891	-0.796214	0	0.977041	1	unchanged
ENSMUSG00000015653	Steap2	six transmembrane epithelial antigen of prostate 2	0.395298	2.61892	0	0.967181	1	unchanged
ENSMUSG00000015656	Hspa8	heat shock protein 8	-0.402097	8.8021	0	0.999539	1	unchanged
ENSMUSG00000015668	Pdzd11	PDZ domain containing 11	0.29063	3.68033	0	0.999003	1	unchanged
ENSMUSG00000015671	Psma2	proteasome subunit alpha 2	0.00813066	7.82915	0	1	1	unchanged
ENSMUSG00000015672	Mrpl32	mitochondrial ribosomal protein L32	-0.154148	3.61024	0	0.999745	1	unchanged
ENSMUSG00000015697	Setdb1	SET domain, bifurcated 1	-0.2814	2.82637	0	0.991505	1	unchanged
ENSMUSG00000015702	Anxa9	annexin A9	1.38854	0.860376	0.752247	0.230745	1	unchanged
ENSMUSG00000015711	Prune1	prune exopolyphosphatase	-0.096895	3.79283	0	0.999733	1	unchanged
ENSMUSG00000015714	Cers2	ceramide synthase 2	-0.819427	7.75917	0	0.845433	1	unchanged
ENSMUSG00000015733	Capza2	capping actin protein of muscle Z-line subunit alpha 2	0.539194	5.94886	0	0.999887	1	unchanged
ENSMUSG00000015745	Plekho1	pleckstrin homology domain containing, family O member 1	1.52572	3.84878	1.70557	0.0523486	0.442302	unchanged
ENSMUSG00000015747	Vps45	vacuolar protein sorting 45	0.197462	2.66919	0	0.998246	1	unchanged
ENSMUSG00000015748	Prpf3	pre-mRNA processing factor 3	-0.266979	3.749	0	0.999448	1	unchanged
ENSMUSG00000015749	Anp32e	acidic nuclear phosphoprotein 32 family member E	-0.0582922	4.76213	0	0.999991	1	unchanged
ENSMUSG00000015750	Aph1a	aph1 homolog A, gamma secretase subunit	-0.0280483	4.05436	0	0.999994	1	unchanged
ENSMUSG00000015755	Tab2	TGF-beta activated kinase 1/MAP3K7 binding protein 2	0.226599	6.51721	0	0.999999	1	unchanged
ENSMUSG00000015757	Ppil4	peptidylprolyl isomerase (cyclophilin)-like 4	0.368234	4.78326	0	0.999809	1	unchanged
ENSMUSG00000015759	Cnih1	cornichon family AMPA receptor auxiliary protein 1	-0.0810525	6.09471	0	1	1	unchanged
ENSMUSG00000015766	Eps8	epidermal growth factor receptor pathway substrate 8	2.4223	1.03368	1.80944	0.0434471	0.383248	unchanged
ENSMUSG00000015776	Med22	mediator complex subunit 22	0.0325079	3.83088	0	0.999985	1	unchanged
ENSMUSG00000015790	Surf1	surfeit gene 1	-0.281537	5.04682	0	0.999964	1	unchanged
ENSMUSG00000015804	Med28	mediator complex subunit 28	0.282286	6.94039	0	0.999993	1	unchanged
ENSMUSG00000015806	Qdpr	quinoid dihydropteridine reductase	-1.73068	8.44771	-4.78728	6.72934e-05	0.00266617	downreg
ENSMUSG00000015812	Gnrh1	gonadotropin releasing hormone 1	-0.422257	-0.111909	0	0.860112	1	unchanged
ENSMUSG00000015837	Sqstm1	sequestosome 1	-0.246174	8.50687	0	0.999974	1	unchanged
ENSMUSG00000015839	Nfe2l2	nuclear factor, erythroid derived 2, like 2	0.055154	6.08557	0	0.999997	1	unchanged
ENSMUSG00000015843	Rxrg	retinoid X receptor gamma	-0.397138	2.28854	0	0.940851	1	unchanged
ENSMUSG00000015846	Rxra	retinoid X receptor alpha	0.107398	7.35847	0	1	1	unchanged
ENSMUSG00000015850	Adamtsl4	ADAMTS-like 4	0.33308	1.58787	0	0.961352	1	unchanged
ENSMUSG00000015854	Cd5l	CD5 antigen-like	3.25805	8.71224	13.3389	2.78154e-11	1.94093e-08	upreg
ENSMUSG00000015869	Prpsap1	phosphoribosyl pyrophosphate synthetase-associated protein 1	-0.372131	5.80787	0	0.999966	1	unchanged
ENSMUSG00000015880	Ncapg	non-SMC condensin I complex, subunit G	2.54837	1.27511	2.07757	0.0259827	0.259592	unchanged
ENSMUSG00000015882	Lcorl	ligand dependent nuclear receptor corepressor-like	-0.484154	3.61968	0	0.996659	1	unchanged
ENSMUSG00000015889	Lta4h	leukotriene A4 hydrolase	-0.410793	4.20331	0	0.999134	1	unchanged
ENSMUSG00000015890	Amdhd1	amidohydrolase domain containing 1	-1.32395	6.84014	-2.17205	0.0214866	0.223252	unchanged
ENSMUSG00000015932	Dstn	destrin	-0.0629045	5.1625	0	0.999966	1	unchanged
ENSMUSG00000015937	Macroh2a1	macroH2A.1 histone	-0.0270835	6.83963	0	1	1	unchanged
ENSMUSG00000015942	Gtf2ird2	GTF2I repeat domain containing 2	-0.470299	1.94651	0	0.973241	1	unchanged
ENSMUSG00000015943	Bola1	bolA family member 1	-0.30041	4.61004	0	0.999892	1	unchanged
ENSMUSG00000015944	Castor2	cytosolic arginine sensor for mTORC1 subunit 2	0.531233	2.45418	0	0.897625	1	unchanged
ENSMUSG00000015947	Fcgr1	Fc receptor, IgG, high affinity I	3.16931	4.28123	6.06504	4.24612e-06	0.00029018	upreg
ENSMUSG00000015950	Ncf1	neutrophil cytosolic factor 1	3.22076	4.44228	4.77438	6.92683e-05	0.00269314	upreg
ENSMUSG00000015961	Adss2	adenylosuccinate synthase 2	-0.324904	4.84481	0	0.99996	1	unchanged
ENSMUSG00000015966	Il17rb	interleukin 17 receptor B	0.728964	3.39993	0	0.926558	1	unchanged
ENSMUSG00000015968	Cacna1d	calcium channel, voltage-dependent, L type, alpha 1D subunit	0.384183	-0.742912	0	0.842868	1	unchanged
ENSMUSG00000015970	Chdh	choline dehydrogenase	-0.540306	6.22514	0	0.997485	1	unchanged
ENSMUSG00000015971	Actr8	ARP8 actin-related protein 8	-0.278782	4.23296	0	0.999971	1	unchanged
ENSMUSG00000015981	Stk32c	serine/threonine kinase 32C	0.651401	-0.204146	0	0.707075	1	unchanged
ENSMUSG00000015994	Fnta	farnesyltransferase, CAAX box, alpha	-0.246639	5.46671	0	0.999984	1	unchanged
ENSMUSG00000016018	Mtrex	Mtr4 exosome RNA helicase	0.167138	4.76679	0	0.999998	1	unchanged
ENSMUSG00000016024	Lbp	lipopolysaccharide binding protein	2.01694	7.90886	5.98763	4.99256e-06	0.000324467	upreg
ENSMUSG00000016028	Celsr1	cadherin, EGF LAG seven-pass G-type receptor 1	-0.631052	3.74366	0	0.95397	1	unchanged
ENSMUSG00000016087	Fli1	Friend leukemia integration 1	1.62641	3.66133	2.37119	0.0143388	0.166905	unchanged
ENSMUSG00000016128	Stard13	StAR related lipid transfer domain containing 13	-0.760352	3.24019	0	0.910172	1	unchanged
ENSMUSG00000016181	Utp25	UTP25 small subunit processome component	0.026666	2.4162	0	0.999777	1	unchanged
ENSMUSG00000016194	Hsd11b1	hydroxysteroid 11-beta dehydrogenase 1	-1.15647	8.19351	-1.03301	0.157408	1	unchanged
ENSMUSG00000016206	H2-M3	histocompatibility 2, M region locus 3	1.66236	2.35296	1.48071	0.0777006	0.601815	unchanged
ENSMUSG00000016239	Lonrf3	LON peptidase N-terminal domain and ring finger 3	-0.782542	-0.268534	0	0.651405	1	unchanged
ENSMUSG00000016252	Atp5f1e	ATP synthase F1 subunit epsilon	-0.460213	7.84329	0	0.999953	1	unchanged
ENSMUSG00000016253	Nelfcd	negative elongation factor complex member C/D, Th1l	-0.340148	5.22944	0	0.996053	1	unchanged
ENSMUSG00000016256	Ctsz	cathepsin Z	0.776738	7.71638	0	0.961151	1	unchanged
ENSMUSG00000016257	Prelid3b	PRELI domain containing 3B	0.0281764	5.45063	0	1	1	unchanged
ENSMUSG00000016283	H2-M2	histocompatibility 2, M region locus 2	2.32689	1.51815	1.13759	0.140014	0.926512	unchanged
ENSMUSG00000016308	Ube2a	ubiquitin-conjugating enzyme E2A	-0.405881	5.23442	0	0.999941	1	unchanged
ENSMUSG00000016319	Slc25a5	solute carrier family 25 (mitochondrial carrier, adenine nucleotide translocator), member 5	-0.537695	7.38392	0	0.991488	1	unchanged
ENSMUSG00000016344	Ppdpf	pancreatic progenitor cell differentiation and proliferation factor	-0.542031	3.85201	0	0.997941	1	unchanged
ENSMUSG00000016382	Pls3	plastin 3 (T-isoform)	-0.263987	5.947	0	0.99991	1	unchanged
ENSMUSG00000016409	Nkap	NFKB activating protein	-0.142389	4.41644	0	0.999988	1	unchanged
ENSMUSG00000016427	Ndufa1	NADH:ubiquinone oxidoreductase subunit A1	-0.664299	6.94532	0	0.994062	1	unchanged
ENSMUSG00000016477	E2f3	E2F transcription factor 3	-0.0267601	2.57434	0	0.99979	1	unchanged
ENSMUSG00000016481	Cr1l	complement C3b/C4b receptor 1 like	-0.0974852	5.83911	0	1	1	unchanged
ENSMUSG00000016487	Ppfibp1	PTPRF interacting protein, binding protein 1 (liprin beta 1)	0.199457	3.75721	0	0.999961	1	unchanged
ENSMUSG00000016493	Cd46	CD46 antigen, complement regulatory protein	0.0565872	-0.568673	0	0.980945	1	unchanged
ENSMUSG00000016494	Cd34	CD34 antigen	1.19488	1.70877	0.556807	0.292144	1	unchanged
ENSMUSG00000016495	Plgrkt	plasminogen receptor, C-terminal lysine transmembrane protein	1.45175	3.61292	1.64503	0.0583605	0.478802	unchanged
ENSMUSG00000016496	Cd274	CD274 antigen	4.40083	2.91541	3.64068	0.000899871	0.0202212	upreg
ENSMUSG00000016498	Pdcd1lg2	programmed cell death 1 ligand 2	3.27433	-0.623882	2.68748	0.00740739	0.10005	unchanged
ENSMUSG00000016503	Gtf3a	general transcription factor III A	-0.268534	3.38095	0	0.997711	1	unchanged
ENSMUSG00000016510	Mtif3	mitochondrial translational initiation factor 3	-0.775231	4.23072	0	0.886087	1	unchanged
ENSMUSG00000016520	Lnx2	ligand of numb-protein X 2	-0.588553	4.29129	0	0.994355	1	unchanged
ENSMUSG00000016526	Dyrk3	dual-specificity tyrosine phosphorylation regulated kinase 3	1.05893	0.434466	0.0941812	0.464946	1	unchanged
ENSMUSG00000016528	Mapkapk2	MAP kinase-activated protein kinase 2	0.545208	6.41297	0	0.999468	1	unchanged
ENSMUSG00000016529	Il10	interleukin 10	3.71609	0.0882184	2.09901	0.0257246	0.257791	unchanged
ENSMUSG00000016534	Lamp2	lysosomal-associated membrane protein 2	-0.29706	8.709	0	0.999999	1	unchanged
ENSMUSG00000016541	Atxn10	ataxin 10	0.0423683	5.56219	0	0.999999	1	unchanged
ENSMUSG00000016554	Eif3d	eukaryotic translation initiation factor 3, subunit D	-0.256433	6.16443	0	0.999998	1	unchanged
ENSMUSG00000016559	H3f3b	H3.3 histone B	0.26525	7.10385	0	0.999987	1	unchanged
ENSMUSG00000016619	Nup50	nucleoporin 50	0.2685	5.11805	0	0.999995	1	unchanged
ENSMUSG00000016637	Ift27	intraflagellar transport 27	-0.14533	2.85577	0	0.999954	1	unchanged
ENSMUSG00000016664	Pacsin2	protein kinase C and casein kinase substrate in neurons 2	-0.0169575	3.72331	0	0.999996	1	unchanged
ENSMUSG00000016756	Cmah	cytidine monophospho-N-acetylneuraminic acid hydroxylase	-0.872452	4.75685	0	0.767141	1	unchanged
ENSMUSG00000016757	Ttll12	tubulin tyrosine ligase-like family, member 12	-0.371125	2.92654	0	0.983342	1	unchanged
ENSMUSG00000016758	Bik	BCL2-interacting killer	-1.46824	0.955175	-1.32533	0.10054	0.72522	unchanged
ENSMUSG00000016831	Tox4	TOX high mobility group box family member 4	0.251505	4.94483	0	0.999989	1	unchanged
ENSMUSG00000016833	Mrps18c	mitochondrial ribosomal protein S18C	-0.151984	5.29303	0	0.999998	1	unchanged
ENSMUSG00000016921	Srsf6	serine and arginine-rich splicing factor 6	-0.0782285	5.83006	0	1	1	unchanged
ENSMUSG00000016933	Plcg1	phospholipase C, gamma 1	-0.315399	4.3887	0	0.996811	1	unchanged
ENSMUSG00000016940	Kctd2	potassium channel tetramerisation domain containing 2	-0.45766	4.74083	0	0.998313	1	unchanged
ENSMUSG00000016942	Tmprss6	transmembrane serine protease 6	-0.865797	7.16694	0	0.883716	1	unchanged
ENSMUSG00000016946	Kctd5	potassium channel tetramerisation domain containing 5	0.596497	1.98381	0	0.912555	1	unchanged
ENSMUSG00000016984	Etaa1	Ewing tumor-associated antigen 1	-0.00885127	1.7521	0	0.999612	1	unchanged
ENSMUSG00000017002	Slpi	secretory leukocyte peptidase inhibitor	4.2652	4.69778	4.36336	0.000174632	0.00573086	upreg
ENSMUSG00000017009	Sdc4	syndecan 4	0.282964	7.25053	0	0.999918	1	unchanged
ENSMUSG00000017057	Il13ra1	interleukin 13 receptor, alpha 1	1.10449	5.28953	0.664744	0.257177	1	unchanged
ENSMUSG00000017119	Nbr1	NBR1, autophagy cargo receptor	-0.135657	6.63557	0	1	1	unchanged
ENSMUSG00000017132	Cyth1	cytohesin 1	0.802444	2.88849	0	0.747986	1	unchanged
ENSMUSG00000017144	Rnd3	Rho family GTPase 3	-0.155623	2.1359	0	0.991895	1	unchanged
ENSMUSG00000017146	Brca1	breast cancer 1, early onset	1.87375	1.54716	1.54609	0.0694804	0.552924	unchanged
ENSMUSG00000017167	Cntnap1	contactin associated protein-like 1	0.64779	-1.20181	0	0.698751	1	unchanged
ENSMUSG00000017176	Nt5c3b	5'-nucleotidase, cytosolic IIIB	0.915571	0.89964	0	0.569679	1	unchanged
ENSMUSG00000017188	Coa3	cytochrome C oxidase assembly factor 3	-0.240064	5.91677	0	0.999991	1	unchanged
ENSMUSG00000017210	Med24	mediator complex subunit 24	-0.0558944	2.53151	0	0.999288	1	unchanged
ENSMUSG00000017221	Psmd3	proteasome (prosome, macropain) 26S subunit, non-ATPase, 3	-0.0811577	7.45742	0	1	1	unchanged
ENSMUSG00000017264	Exosc10	exosome component 10	0.116889	4.47885	0	0.999997	1	unchanged
ENSMUSG00000017286	Glod4	glyoxalase domain containing 4	-0.704853	4.43765	0	0.942064	1	unchanged
ENSMUSG00000017288	Vps53	VPS53 GARP complex subunit	-0.220158	4.96433	0	0.999999	1	unchanged
ENSMUSG00000017291	Taok1	TAO kinase 1	-0.0305008	6.33734	0	1	1	unchanged
ENSMUSG00000017299	Dnttip1	deoxynucleotidyltransferase, terminal, interacting protein 1	0.0219663	3.8645	0	0.999996	1	unchanged
ENSMUSG00000017307	Acot8	acyl-CoA thioesterase 8	-0.540522	4.76121	0	0.997274	1	unchanged
ENSMUSG00000017309	Cd300lg	CD300 molecule like family member G	0.327746	3.94087	0	0.999102	1	unchanged
ENSMUSG00000017344	Vtn	vitronectin	0.60943	10.9738	0	0.99806	1	unchanged
ENSMUSG00000017376	Nlk	nemo like kinase	-0.201951	4.21077	0	0.999965	1	unchanged
ENSMUSG00000017386	Traf4	TNF receptor associated factor 4	-0.515742	3.30012	0	0.975666	1	unchanged
ENSMUSG00000017390	Aldoc	aldolase C, fructose-bisphosphate	-0.742241	4.18565	0	0.900004	1	unchanged
ENSMUSG00000017404	Rpl19	ribosomal protein L19	0.391745	5.58403	0	0.999523	1	unchanged
ENSMUSG00000017405	Nek8	NIMA (never in mitosis gene a)-related expressed kinase 8	-0.508665	0.522424	0	0.792015	1	unchanged
ENSMUSG00000017417	Plxdc1	plexin domain containing 1	0.556489	-0.31476	0	0.822444	1	unchanged
ENSMUSG00000017418	Arl5b	ADP-ribosylation factor-like 5B	-0.498701	3.65151	0	0.986639	1	unchanged
ENSMUSG00000017421	Zfp207	zinc finger protein 207	-0.0207561	6.0526	0	1	1	unchanged
ENSMUSG00000017428	Psmd11	proteasome (prosome, macropain) 26S subunit, non-ATPase, 11	-0.395257	6.71018	0	0.999984	1	unchanged
ENSMUSG00000017446	C1qtnf1	C1q and tumor necrosis factor related protein 1	0.997255	2.28183	0	0.503022	1	unchanged
ENSMUSG00000017453	Pipox	pipecolic acid oxidase	-0.65287	7.50152	0	0.995449	1	unchanged
ENSMUSG00000017466	Timp2	tissue inhibitor of metalloproteinase 2	-0.0720616	4.33409	0	0.999991	1	unchanged
ENSMUSG00000017478	Zc3h18	zinc finger CCCH-type containing 18	0.0793898	5.58404	0	0.999995	1	unchanged
ENSMUSG00000017485	Top2b	topoisomerase (DNA) II beta	-0.026548	5.87305	0	1	1	unchanged
ENSMUSG00000017491	Rarb	retinoic acid receptor, beta	-0.54762	0.589878	0	0.822381	1	unchanged
ENSMUSG00000017493	Igfbp4	insulin-like growth factor binding protein 4	0.122081	10.2354	0	1	1	unchanged
ENSMUSG00000017499	Cdc6	cell division cycle 6	4.04629	1.05887	4.05244	0.000352488	0.00975633	upreg
ENSMUSG00000017548	Suz12	SUZ12 polycomb repressive complex 2 subunit	0.2339	3.63646	0	0.99918	1	unchanged
ENSMUSG00000017550	Atad5	ATPase family, AAA domain containing 5	1.02537	1.3199	0.0477409	0.481821	1	unchanged
ENSMUSG00000017561	Crlf3	cytokine receptor-like factor 3	0.93226	3.81674	0	0.612042	1	unchanged
ENSMUSG00000017607	Tns4	tensin 4	2.1171	0.702705	1.92421	0.0348848	0.325935	unchanged
ENSMUSG00000017615	Tnfaip1	tumor necrosis factor, alpha-induced protein 1 (endothelial)	0.135085	6.00278	0	1	1	unchanged
ENSMUSG00000017631	Abr	active BCR-related gene	2.33564	3.24705	3.58751	0.00100599	0.021824	upreg
ENSMUSG00000017639	Rab11fip4	RAB11 family interacting protein 4 (class II)	0.600502	1.96822	0	0.787104	1	unchanged
ENSMUSG00000017652	Cd40	CD40 antigen	2.75091	2.43067	2.69224	0.0073029	0.0988987	unchanged
ENSMUSG00000017664	Slc35c2	solute carrier family 35, member C2	0.429163	4.23993	0	0.998836	1	unchanged
ENSMUSG00000017667	Zfp334	zinc finger protein 334	-0.0837856	1.06166	0	0.979432	1	unchanged
ENSMUSG00000017670	Elmo2	engulfment and cell motility 2	1.44973	3.34161	1.68621	0.0542101	0.453736	unchanged
ENSMUSG00000017677	Wsb1	WD repeat and SOCS box-containing 1	0.509768	3.49477	0	0.987401	1	unchanged
ENSMUSG00000017679	Ttpal	tocopherol (alpha) transfer protein-like	0.574051	3.21088	0	0.959142	1	unchanged
ENSMUSG00000017686	Rhot1	ras homolog family member T1	-0.359893	5.34679	0	0.999963	1	unchanged
ENSMUSG00000017697	Ada	adenosine deaminase	1.47766	1.86255	0.970322	0.172194	1	unchanged
ENSMUSG00000017707	Serinc3	serine incorporator 3	0.931484	8.79621	0	0.702152	1	unchanged
ENSMUSG00000017713	Tha1	threonine aldolase 1	2.10967	2.12492	2.33664	0.0153967	0.175459	unchanged
ENSMUSG00000017715	Pgs1	phosphatidylglycerophosphate synthase 1	0.494938	4.04133	0	0.971241	1	unchanged
ENSMUSG00000017716	Birc5	baculoviral IAP repeat-containing 5	3.12367	3.81007	3.20542	0.00237411	0.0409843	upreg
ENSMUSG00000017718	Afmid	arylformamidase	-1.54554	3.38511	-2.01508	0.0292751	0.28518	unchanged
ENSMUSG00000017721	Pigt	phosphatidylinositol glycan anchor biosynthesis, class T	-0.204854	3.58507	0	0.989667	1	unchanged
ENSMUSG00000017723	Wfdc2	WAP four-disulfide core domain 2	-0.965251	2.3258	0	0.53363	1	unchanged
ENSMUSG00000017734	Dbndd2	dysbindin domain containing 2	-0.709165	1.10239	0	0.757952	1	unchanged
ENSMUSG00000017737	Mmp9	matrix metallopeptidase 9	3.27638	0.95332	2.20577	0.0203683	0.213811	unchanged
ENSMUSG00000017740	Slc12a5	solute carrier family 12, member 5	-0.369444	0.378808	0	0.923024	1	unchanged
ENSMUSG00000017747	Ghdc	GH3 domain containing	-0.324249	3.6696	0	0.998841	1	unchanged
ENSMUSG00000017754	Pltp	phospholipid transfer protein	0.00642254	4.99945	0	0.999992	1	unchanged
ENSMUSG00000017756	Slc12a7	solute carrier family 12, member 7	-0.171495	5.70672	0	0.999998	1	unchanged
ENSMUSG00000017760	Ctsa	cathepsin A	0.423723	6.64676	0	0.999967	1	unchanged
ENSMUSG00000017764	Zswim1	zinc finger SWIM-type containing 1	0.48875	1.25425	0	0.853081	1	unchanged
ENSMUSG00000017765	Slc12a4	solute carrier family 12, member 4	0.557409	3.29491	0	0.964904	1	unchanged
ENSMUSG00000017774	Myo1c	myosin IC	0.524721	4.8034	0	0.996893	1	unchanged
ENSMUSG00000017776	Crk	v-crk avian sarcoma virus CT10 oncogene homolog	0.0623731	3.83092	0	0.999996	1	unchanged
ENSMUSG00000017778	Cox7c	cytochrome c oxidase subunit 7C	-0.788779	8.50605	0	0.952662	1	unchanged
ENSMUSG00000017781	Pitpna	phosphatidylinositol transfer protein, alpha	0.620927	6.04637	0	0.996863	1	unchanged
ENSMUSG00000017801	Mlx	MAX-like protein X	-0.337124	5.00189	0	0.999713	1	unchanged
ENSMUSG00000017802	Retreg3	reticulophagy regulator family member 3	-0.36627	2.04516	0	0.976181	1	unchanged
ENSMUSG00000017830	Dhx58	DExH-box helicase 58	0.866819	3.27862	0	0.619418	1	unchanged
ENSMUSG00000017831	Rab5a	RAB5A, member RAS oncogene family	0.315423	0.153316	0	0.920953	1	unchanged
ENSMUSG00000017837	Nkiras2	NFKB inhibitor interacting Ras-like protein 2	0.570104	3.91332	0	0.977517	1	unchanged
ENSMUSG00000017843	Ppp2r5c	protein phosphatase 2, regulatory subunit B', gamma	-0.112672	4.8465	0	1	1	unchanged
ENSMUSG00000017858	Ift52	intraflagellar transport 52	-0.446555	4.23213	0	0.998288	1	unchanged
ENSMUSG00000017868	Sgk2	serum/glucocorticoid regulated kinase 2	-1.3668	5.76595	-1.78255	0.0454778	0.397968	unchanged
ENSMUSG00000017929	B4galt5	UDP-Gal:betaGlcNAc beta 1,4-galactosyltransferase, polypeptide 5	0.0592472	5.16975	0	0.998339	1	unchanged
ENSMUSG00000017950	Hnf4a	hepatic nuclear factor 4, alpha	-0.201402	8.63731	0	0.999997	1	unchanged
ENSMUSG00000017969	Ptgis	prostaglandin I2 (prostacyclin) synthase	0.689236	0.718221	0	0.676225	1	unchanged
ENSMUSG00000017978	Cadps2	Ca2+-dependent activator protein for secretion 2	-0.371664	2.9138	0	0.996708	1	unchanged
ENSMUSG00000017999	Ddx27	DEAD box helicase 27	-0.0861734	4.42917	0	0.999988	1	unchanged
ENSMUSG00000018001	Cyth3	cytohesin 3	0.577464	2.32639	0	0.934632	1	unchanged
ENSMUSG00000018008	Cyth4	cytohesin 4	2.97542	4.20646	5.61287	1.10546e-05	0.000634467	upreg
ENSMUSG00000018040	Rrp7a	ribosomal RNA processing 7 homolog A	0.855558	1.35546	0	0.663965	1	unchanged
ENSMUSG00000018042	Cyb5r3	cytochrome b5 reductase 3	-1.51717	8.21907	-3.51494	0.00118482	0.02474	downreg
ENSMUSG00000018068	Ints2	integrator complex subunit 2	-0.0329274	3.02625	0	0.999986	1	unchanged
ENSMUSG00000018076	Med13l	mediator complex subunit 13-like	-0.0477064	4.2917	0	0.999996	1	unchanged
ENSMUSG00000018102	H2bc4	H2B clustered histone 4	-0.617771	8.00559	0	0.99384	1	unchanged
ENSMUSG00000018143	Mafk	v-maf musculoaponeurotic fibrosarcoma oncogene family, protein K (avian)	0.459636	3.27009	0	0.984692	1	unchanged
ENSMUSG00000018160	Med1	mediator complex subunit 1	0.0313753	5.5281	0	1	1	unchanged
ENSMUSG00000018166	Erbb3	erb-b2 receptor tyrosine kinase 3	-0.61805	4.66074	0	0.990147	1	unchanged
ENSMUSG00000018167	Stard3	StAR related lipid transfer domain containing 3	0.169429	4.13467	0	0.999982	1	unchanged
ENSMUSG00000018168	Ikzf3	IKAROS family zinc finger 3	2.9498	0.827764	2.35473	0.0149033	0.171815	unchanged
ENSMUSG00000018169	Mfng	MFNG O-fucosylpeptide 3-beta-N-acetylglucosaminyltransferase	2.69536	0.672948	2.13504	0.0232213	0.238288	unchanged
ENSMUSG00000018171	Vmp1	vacuole membrane protein 1	-0.259438	7.60843	0	0.999999	1	unchanged
ENSMUSG00000018189	Uchl5	ubiquitin carboxyl-terminal esterase L5	-0.38604	4.14671	0	0.997605	1	unchanged
ENSMUSG00000018196	Glrx2	glutaredoxin 2	-0.268579	4.90976	0	0.999984	1	unchanged
ENSMUSG00000018199	Ro60	Ro60, Y RNA binding protein	0.267302	2.88445	0	0.995553	1	unchanged
ENSMUSG00000018209	Stk4	serine/threonine kinase 4	0.357157	4.7443	0	0.999758	1	unchanged
ENSMUSG00000018217	Pmp22	peripheral myelin protein 22	0.0589284	2.02016	0	0.997286	1	unchanged
ENSMUSG00000018239	Zcchc10	zinc finger, CCHC domain containing 10	-0.0126913	3.15028	0	0.99995	1	unchanged
ENSMUSG00000018286	Psmb6	proteasome (prosome, macropain) subunit, beta type 6	-0.0635193	7.32351	0	1	1	unchanged
ENSMUSG00000018287	Spag7	sperm associated antigen 7	-0.67355	5.41731	0	0.979602	1	unchanged
ENSMUSG00000018293	Pfn1	profilin 1	0.754433	4.15136	0	0.785941	1	unchanged
ENSMUSG00000018322	Tomm34	translocase of outer mitochondrial membrane 34	0.0667765	3.50952	0	0.999931	1	unchanged
ENSMUSG00000018326	Ywhab	tyrosine 3-monooxygenase/tryptophan 5-monooxygenase activation protein, beta polypeptide	0.0255237	7.7794	0	1	1	unchanged
ENSMUSG00000018334	Ksr1	kinase suppressor of ras 1	0.983635	1.96793	0	0.518282	1	unchanged
ENSMUSG00000018339	Gpx3	glutathione peroxidase 3	2.11776	3.32214	3.23922	0.00219899	0.0386201	upreg
ENSMUSG00000018340	Anxa6	annexin A6	-0.114523	7.06626	0	1	1	unchanged
ENSMUSG00000018341	Il12rb2	interleukin 12 receptor, beta 2	2.05751	-0.345065	1.26335	0.111887	0.786115	unchanged
ENSMUSG00000018347	Zkscan6	zinc finger with KRAB and SCAN domains 6	0.625256	2.02928	0	0.916736	1	unchanged
ENSMUSG00000018363	Smurf2	SMAD specific E3 ubiquitin protein ligase 2	-0.0403228	4.5267	0	0.999996	1	unchanged
ENSMUSG00000018372	Cep95	centrosomal protein 95	-0.193537	1.77606	0	0.997231	1	unchanged
ENSMUSG00000018377	Vezf1	vascular endothelial zinc finger 1	-0.000693676	3.88107	0	1	1	unchanged
ENSMUSG00000018378	2210416O15Rik	RIKEN cDNA 2210416O15 gene	-0.385156	0.437682	0	0.931929	1	unchanged
ENSMUSG00000018379	Srsf1	serine and arginine-rich splicing factor 1	0.120079	6.13764	0	1	1	unchanged
ENSMUSG00000018381	Abi3	ABI family member 3	2.36997	4.99976	4.88023	5.4731e-05	0.00230357	upreg
ENSMUSG00000018387	Shroom1	shroom family member 1	-0.0855131	4.31277	0	0.999347	1	unchanged
ENSMUSG00000018395	Kif3a	kinesin family member 3A	-0.260823	2.82585	0	0.994411	1	unchanged
ENSMUSG00000018398	Septin8	septin 8	1.22797	3.3286	1.0336	0.157275	1	unchanged
ENSMUSG00000018401	Mtmr4	myotubularin related protein 4	-0.437158	6.1248	0	0.999379	1	unchanged
ENSMUSG00000018405	Mrm1	mitochondrial rRNA methyltransferase 1	-0.00858362	1.74287	0	0.999527	1	unchanged
ENSMUSG00000018411	Mapt	microtubule-associated protein tau	-0.694885	2.14015	0	0.885225	1	unchanged
ENSMUSG00000018412	Kansl1	KAT8 regulatory NSL complex subunit 1	-0.0391142	4.20656	0	0.999999	1	unchanged
ENSMUSG00000018415	Gid4	GID complex subunit 4, VID24 homolog	-0.833727	4.03565	0	0.861458	1	unchanged
ENSMUSG00000018417	Myo1b	myosin IB	-0.739157	6.42548	0	0.961168	1	unchanged
ENSMUSG00000018425	Dhx40	DEAH-box helicase 40	-0.341026	4.99971	0	0.999985	1	unchanged
ENSMUSG00000018427	Ypel2	yippee like 2	-0.663263	3.50429	0	0.937369	1	unchanged
ENSMUSG00000018428	Akap1	A kinase anchor protein 1	-0.471195	5.418	0	0.996988	1	unchanged
ENSMUSG00000018433	Nol11	nucleolar protein 11	0.054841	4.31946	0	0.999978	1	unchanged
ENSMUSG00000018442	Derl2	Der1-like domain family, member 2	-0.541792	6.73575	0	0.998357	1	unchanged
ENSMUSG00000018446	C1qbp	complement component 1, q subcomponent binding protein	-0.513258	6.78067	0	0.99937	1	unchanged
ENSMUSG00000018449	Rpain	RPA interacting protein	0.263057	4.38086	0	0.999952	1	unchanged
ENSMUSG00000018459	Slc13a3	solute carrier family 13 (sodium-dependent dicarboxylate transporter), member 3	3.01863	5.50467	6.59468	1.43108e-06	0.000128198	upreg
ENSMUSG00000018474	Chd3	chromodomain helicase DNA binding protein 3	0.10573	6.36688	0	0.999962	1	unchanged
ENSMUSG00000018476	Kdm6b	KDM1 lysine (K)-specific demethylase 6B	-0.00396821	3.01155	0	0.999803	1	unchanged
ENSMUSG00000018481	Appbp2	amyloid beta precursor protein binding protein 2	-0.101639	4.33293	0	0.999997	1	unchanged
ENSMUSG00000018486	Wnt9b	wingless-type MMTV integration site family, member 9B	0.893332	-0.132947	0	0.568701	1	unchanged
ENSMUSG00000018500	Adora2b	adenosine A2b receptor	2.5237	-0.873709	1.45455	0.0828777	0.632945	unchanged
ENSMUSG00000018501	Ncor1	nuclear receptor co-repressor 1	-0.202312	7.68264	0	1	1	unchanged
ENSMUSG00000018507	Trpv2	transient receptor potential cation channel, subfamily V, member 2	3.81709	1.64266	3.24793	0.00216923	0.0383974	upreg
ENSMUSG00000018509	Cenpv	centromere protein V	-0.452482	4.44187	0	0.999492	1	unchanged
ENSMUSG00000018537	Pcgf2	polycomb group ring finger 2	-1.32549	1.86609	-1.04989	0.153595	0.99432	unchanged
ENSMUSG00000018541	Cwc25	CWC25 spliceosome-associated protein	0.298199	4.29634	0	0.998083	1	unchanged
ENSMUSG00000018547	Pip4k2b	phosphatidylinositol-5-phosphate 4-kinase, type II, beta	-0.00105407	4.38187	0	0.999999	1	unchanged
ENSMUSG00000018548	Trim37	tripartite motif-containing 37	-0.109977	3.32385	0	0.999706	1	unchanged
ENSMUSG00000018559	Ctdnep1	CTD nuclear envelope phosphatase 1	0.412921	4.35669	0	0.998225	1	unchanged
ENSMUSG00000018565	Elp5	elongator acetyltransferase complex subunit 5	-0.350789	4.4938	0	0.999928	1	unchanged
ENSMUSG00000018567	Gabarap	gamma-aminobutyric acid receptor associated protein	0.0716921	6.9561	0	1	1	unchanged
ENSMUSG00000018572	Phf23	PHD finger protein 23	0.41417	5.32393	0	0.999617	1	unchanged
ENSMUSG00000018574	Acadvl	acyl-Coenzyme A dehydrogenase, very long chain	-0.66217	7.8123	0	0.997952	1	unchanged
ENSMUSG00000018583	G3bp1	G3BP stress granule assembly factor 1	0.25295	6.43997	0	1	1	unchanged
ENSMUSG00000018585	Atox1	antioxidant 1 copper chaperone	0.24637	7.58895	0	0.999999	1	unchanged
ENSMUSG00000018593	Sparc	secreted acidic cysteine rich glycoprotein	0.354397	7.63618	0	0.999959	1	unchanged
ENSMUSG00000018599	Mief2	mitochondrial elongation factor 2	-0.767223	3.48317	0	0.881923	1	unchanged
ENSMUSG00000018604	Tbx3	T-box 3	0.509265	4.76175	0	0.871399	1	unchanged
ENSMUSG00000018623	Mmp7	matrix metallopeptidase 7	5.49552	0.494848	3.56594	0.00108615	0.0230771	upreg
ENSMUSG00000018648	Dusp14	dual specificity phosphatase 14	0.535351	0.952099	0	0.793421	1	unchanged
ENSMUSG00000018651	Tada2a	transcriptional adaptor 2A	-0.128731	3.25803	0	0.998909	1	unchanged
ENSMUSG00000018654	Ikzf1	IKAROS family zinc finger 1	3.42315	3.67603	6.19307	3.25381e-06	0.000250808	upreg
ENSMUSG00000018659	Pnpo	pyridoxine 5'-phosphate oxidase	0.239647	7.10426	0	0.999967	1	unchanged
ENSMUSG00000018661	Cog1	component of oligomeric golgi complex 1	-0.152312	2.67812	0	0.999305	1	unchanged
ENSMUSG00000018666	Cbx1	chromobox 1	-0.26578	6.31768	0	0.999999	1	unchanged
ENSMUSG00000018669	Cdk5rap3	CDK5 regulatory subunit associated protein 3	-0.0469083	5.05375	0	0.999999	1	unchanged
ENSMUSG00000018672	Copz2	coatomer protein complex, subunit zeta 2	-0.0685963	3.3878	0	0.99995	1	unchanged
ENSMUSG00000018677	Slc25a39	solute carrier family 25, member 39	-0.277066	8.51119	0	0.999998	1	unchanged
ENSMUSG00000018678	Sp2	Sp2 transcription factor	0.722138	1.93114	0	0.806484	1	unchanged
ENSMUSG00000018697	Aatf	apoptosis antagonizing transcription factor	-0.470475	2.81016	0	0.977919	1	unchanged
ENSMUSG00000018707	Dync1h1	dynein cytoplasmic 1 heavy chain 1	0.0867613	6.73106	0	0.999996	1	unchanged
ENSMUSG00000018727	Cpsf4l	cleavage and polyadenylation specific factor 4-like	0.26528	1.2211	0	0.963379	1	unchanged
ENSMUSG00000018733	Pex12	peroxisomal biogenesis factor 12	-0.414691	3.06993	0	0.983735	1	unchanged
ENSMUSG00000018736	Ndel1	nudE neurodevelopment protein 1 like 1	0.220633	5.27273	0	0.999991	1	unchanged
ENSMUSG00000018740	Slc25a35	solute carrier family 25, member 35	0.42898	0.119739	0	0.839507	1	unchanged
ENSMUSG00000018750	Zbtb4	zinc finger and BTB domain containing 4	0.966586	4.4531	0	0.578977	1	unchanged
ENSMUSG00000018752	Tnfsfm13	tumor necrosis factor (ligand) superfamily, membrane-bound member 13	1.19866	-0.585452	0.355431	0.363588	1	unchanged
ENSMUSG00000018761	Mpdu1	mannose-P-dolichol utilization defect 1	-0.231235	6.24498	0	0.999784	1	unchanged
ENSMUSG00000018765	Fxr2	FMR1 autosomal homolog 2	-0.371642	5.04948	0	0.999941	1	unchanged
ENSMUSG00000018770	Atp5mc3	ATP synthase membrane subunit c locus 3	-0.874543	9.65633	0	0.89335	1	unchanged
ENSMUSG00000018774	Cd68	CD68 antigen	2.60772	5.30006	6.0841	4.08032e-06	0.000285059	upreg
ENSMUSG00000018796	Acsl1	acyl-CoA synthetase long-chain family member 1	-2.2312	7.98259	-7.74074	1.54747e-07	2.07236e-05	downreg
ENSMUSG00000018800	Abca5	ATP-binding cassette, sub-family A member 5	-0.592326	0.806346	0	0.834786	1	unchanged
ENSMUSG00000018809	Smyd4	SET and MYND domain containing 4	-0.104151	1.29862	0	0.97805	1	unchanged
ENSMUSG00000018819	Lsp1	lymphocyte specific 1	2.65537	2.62054	4.16566	0.000271971	0.00804864	upreg
ENSMUSG00000018820	Zfyve27	zinc finger, FYVE domain containing 27	0.126935	2.94168	0	0.999818	1	unchanged
ENSMUSG00000018821	Avpi1	arginine vasopressin-induced 1	-0.105372	5.61483	0	1	1	unchanged
ENSMUSG00000018830	Myh11	myosin, heavy polypeptide 11, smooth muscle	0.186191	0.619012	0	0.961031	1	unchanged
ENSMUSG00000018841	Rad51d	RAD51 paralog D	-0.751916	2.70257	0	0.82975	1	unchanged
ENSMUSG00000018845	Unc45b	unc-45 myosin chaperone B	1.11774	2.46491	0.439473	0.332686	1	unchanged
ENSMUSG00000018846	Pank3	pantothenate kinase 3	-0.246081	5.19274	0	0.999985	1	unchanged
ENSMUSG00000018848	Rars1	arginyl-tRNA synthetase 1	0.418807	5.37698	0	0.999767	1	unchanged
ENSMUSG00000018849	Wwc1	WW, C2 and coiled-coil domain containing 1	-0.0468764	5.62869	0	0.999997	1	unchanged
ENSMUSG00000018858	Mrpl58	mitochondrial ribosomal protein L58	-0.116182	4.99982	0	1	1	unchanged
ENSMUSG00000018861	Fdxr	ferredoxin reductase	-0.625907	3.97323	0	0.990875	1	unchanged
ENSMUSG00000018882	Mrpl45	mitochondrial ribosomal protein L45	-0.574755	5.12047	0	0.999318	1	unchanged
ENSMUSG00000018899	Irf1	interferon regulatory factor 1	2.07083	7.54493	3.49703	0.0012336	0.0255149	upreg
ENSMUSG00000018900	Slc22a5	solute carrier family 22 (organic cation transporter), member 5	-0.346801	1.97163	0	0.987762	1	unchanged
ENSMUSG00000018906	P4ha2	procollagen-proline, 2-oxoglutarate 4-dioxygenase (proline 4-hydroxylase), alpha II polypeptide	-1.06416	2.11992	-0.242125	0.405664	1	unchanged
ENSMUSG00000018909	Arrb1	arrestin, beta 1	0.998426	4.33168	0	0.502963	1	unchanged
ENSMUSG00000018920	Cxcl16	C-X-C motif chemokine ligand 16	2.13959	5.34461	4.19342	0.000255415	0.00778459	upreg
ENSMUSG00000018921	Pelp1	proline, glutamic acid and leucine rich protein 1	0.402634	3.63554	0	0.989988	1	unchanged
ENSMUSG00000018923	Med11	mediator complex subunit 11	-0.0428131	3.55941	0	0.999998	1	unchanged
ENSMUSG00000018927	Ccl6	C-C motif chemokine ligand 6	3.96653	6.16301	11.3253	4.267e-10	1.45056e-07	upreg
ENSMUSG00000018930	Ccl4	C-C motif chemokine ligand 4	3.3905	0.993817	1.63279	0.0633921	0.512826	unchanged
ENSMUSG00000018931	Natd1	N-acetyltransferase domain containing 1	0.639955	1.94362	0	0.828813	1	unchanged
ENSMUSG00000018932	Map2k3	mitogen-activated protein kinase kinase 3	-0.155378	5.75015	0	0.999999	1	unchanged
ENSMUSG00000018965	Ywhah	tyrosine 3-monooxygenase/tryptophan 5-monooxygenase activation protein, eta polypeptide	0.449659	5.3659	0	0.99857	1	unchanged
ENSMUSG00000018974	Sart3	squamous cell carcinoma antigen recognized by T cells 3	-0.0360472	3.83298	0	0.999996	1	unchanged
ENSMUSG00000018983	E2f2	E2F transcription factor 2	1.45023	3.20313	0.714463	0.242406	1	unchanged
ENSMUSG00000018995	Nars2	asparaginyl-tRNA synthetase 2 (mitochondrial)(putative)	-0.996209	2.82592	0	0.505863	1	unchanged
ENSMUSG00000018999	Slc35b4	solute carrier family 35, member B4	-0.30018	4.36108	0	0.999964	1	unchanged
ENSMUSG00000019027	Dnah1	dynein, axonemal, heavy chain 1	2.57869	-1.4417	1.29064	0.110703	0.77945	unchanged
ENSMUSG00000019039	Dalrd3	DALR anticodon binding domain containing 3	-0.581337	4.97596	0	0.998944	1	unchanged
ENSMUSG00000019054	Fis1	fission, mitochondrial 1	0.142381	5.61471	0	1	1	unchanged
ENSMUSG00000019055	Plod1	procollagen-lysine, 2-oxoglutarate 5-dioxygenase 1	0.333883	5.79681	0	0.99999	1	unchanged
ENSMUSG00000019066	Rab3d	RAB3D, member RAS oncogene family	-0.0807037	3.30463	0	0.999766	1	unchanged
ENSMUSG00000019080	Mfsd3	major facilitator superfamily domain containing 3	-0.663401	3.01486	0	0.899344	1	unchanged
ENSMUSG00000019082	Slc25a22	solute carrier family 25 (mitochondrial carrier, glutamate), member 22	-0.808199	6.30869	0	0.781222	1	unchanged
ENSMUSG00000019087	Atp6ap1	ATPase, H+ transporting, lysosomal accessory protein 1	0.256533	6.64989	0	0.999973	1	unchanged
ENSMUSG00000019088	Dnase1l1	deoxyribonuclease 1-like 1	0.395714	2.13772	0	0.970552	1	unchanged
ENSMUSG00000019122	Ccl9	C-C motif chemokine ligand 9	0.255946	6.08464	0	0.999382	1	unchanged
ENSMUSG00000019132	BC005537	cDNA sequence BC005537	0.0905656	6.38573	0	1	1	unchanged
ENSMUSG00000019139	Isyna1	myo-inositol 1-phosphate synthase A1	4.31337	6.10984	11.1827	5.25147e-10	1.65771e-07	upreg
ENSMUSG00000019143	Hars2	histidyl-tRNA synthetase 2	-0.777308	3.74099	0	0.947699	1	unchanged
ENSMUSG00000019158	Tmem160	transmembrane protein 160	-0.186313	6.1355	0	0.999981	1	unchanged
ENSMUSG00000019173	Rab5c	RAB5C, member RAS oncogene family	0.434496	6.9739	0	0.999883	1	unchanged
ENSMUSG00000019179	Mdh2	malate dehydrogenase 2, NAD (mitochondrial)	-0.470063	7.74292	0	0.999958	1	unchanged
ENSMUSG00000019188	H13	histocompatibility 13	-0.0472138	6.84752	0	1	1	unchanged
ENSMUSG00000019189	Rnf145	ring finger protein 145	0.547382	4.4405	0	0.987592	1	unchanged
ENSMUSG00000019194	Scn1b	sodium channel, voltage-gated, type I, beta	2.07163	3.66303	3.90482	0.000490796	0.0124894	upreg
ENSMUSG00000019210	Atp6v1e1	ATPase, H+ transporting, lysosomal V1 subunit E1	0.109319	7.02218	0	1	1	unchanged
ENSMUSG00000019214	Chtf18	CTF18, chromosome transmission fidelity factor 18	2.34767	-0.436414	1.99346	0.030574	0.294852	unchanged
ENSMUSG00000019232	Etnppl	ethanolamine phosphate phospholyase	-2.30715	5.56065	-5.05033	3.75703e-05	0.00169424	downreg
ENSMUSG00000019254	Ppp1r12c	protein phosphatase 1, regulatory subunit 12C	0.755556	4.69796	0	0.894755	1	unchanged
ENSMUSG00000019256	Ahr	aryl-hydrocarbon receptor	1.01747	5.06826	0.107662	0.457707	1	unchanged
ENSMUSG00000019261	Map1s	microtubule-associated protein 1S	1.44941	3.06311	1.62501	0.0604746	0.493702	unchanged
ENSMUSG00000019278	Dpep1	dipeptidase 1	0.849134	0.153181	0	0.606577	1	unchanged
ENSMUSG00000019295	Tmem129	transmembrane protein 129	-0.170735	3.33572	0	0.999945	1	unchanged
ENSMUSG00000019297	Nop9	NOP9 nucleolar protein	0.166825	4.4818	0	0.999963	1	unchanged
ENSMUSG00000019302	Atp6v0a1	ATPase, H+ transporting, lysosomal V0 subunit A1	-0.191975	4.98173	0	0.99999	1	unchanged
ENSMUSG00000019312	Grb7	growth factor receptor bound protein 7	-1.05617	6.15717	-0.296737	0.384974	1	unchanged
ENSMUSG00000019320	Noxo1	NADPH oxidase organizer 1	1.22413	0.156675	0.393796	0.349588	1	unchanged
ENSMUSG00000019338	Zfp687	zinc finger protein 687	0.44979	2.88154	0	0.986502	1	unchanged
ENSMUSG00000019362	D8Ertd738e	DNA segment, Chr 8, ERATO Doi 738, expressed	-0.163418	6.24546	0	0.999999	1	unchanged
ENSMUSG00000019368	Sec14l4	SEC14-like lipid binding 4	0.220219	7.46691	0	0.99999	1	unchanged
ENSMUSG00000019370	Calm3	calmodulin 3	0.291468	6.13238	0	0.99999	1	unchanged
ENSMUSG00000019373	Cops3	COP9 signalosome subunit 3	0.0335748	4.79468	0	1	1	unchanged
ENSMUSG00000019428	Fkbp8	FK506 binding protein 8	-0.0258207	6.96855	0	1	1	unchanged
ENSMUSG00000019432	Ddx39b	DEAD box helicase 39b	0.193111	5.8191	0	0.999999	1	unchanged
ENSMUSG00000019433	Gipc1	GIPC PDZ domain containing family, member 1	0.549238	2.80206	0	0.912581	1	unchanged
ENSMUSG00000019437	Tlcd1	TLC domain containing 1	-0.900327	4.4472	0	0.705111	1	unchanged
ENSMUSG00000019461	Plscr3	phospholipid scramblase 3	0.677698	2.89856	0	0.888719	1	unchanged
ENSMUSG00000019467	Arhgef25	Rho guanine nucleotide exchange factor 25	0.825929	0.479088	0	0.642052	1	unchanged
ENSMUSG00000019470	Xab2	XPA binding protein 2	0.262114	3.0489	0	0.998811	1	unchanged
ENSMUSG00000019471	Cdc37	cell division cycle 37	-0.018785	5.93248	0	1	1	unchanged
ENSMUSG00000019478	Rab4a	RAB4A, member RAS oncogene family	0.628816	4.2462	0	0.978343	1	unchanged
ENSMUSG00000019487	Trip10	thyroid hormone receptor interactor 10	-1.71014	0.941983	-1.41791	0.0863758	0.651359	unchanged
ENSMUSG00000019494	Cops6	COP9 signalosome subunit 6	-0.174186	5.50744	0	0.999989	1	unchanged
ENSMUSG00000019505	Ubb	ubiquitin B	0.261275	8.37517	0	0.999808	1	unchanged
ENSMUSG00000019518	Ap4m1	adaptor-related protein complex AP-4, mu 1	-0.160755	3.01441	0	0.999675	1	unchanged
ENSMUSG00000019528	Gyg1	glycogenin 1	0.968488	3.19193	0	0.547983	1	unchanged
ENSMUSG00000019539	Rcn3	reticulocalbin 3, EF-hand calcium binding domain	0.33418	2.82644	0	0.961777	1	unchanged
ENSMUSG00000019558	Slc6a8	solute carrier family 6 (neurotransmitter transporter, creatine), member 8	1.34032	1.92294	0.73778	0.234953	1	unchanged
ENSMUSG00000019564	Arid3a	AT-rich interaction domain 3A	2.25738	2.79626	3.20812	0.00235689	0.0409	upreg
ENSMUSG00000019578	Ubxn6	UBX domain protein 6	-0.312358	5.0432	0	0.999996	1	unchanged
ENSMUSG00000019579	Mydgf	myeloid derived growth factor	-0.00266402	6.26328	0	1	1	unchanged
ENSMUSG00000019590	Cyb561	cytochrome b-561	2.4809	3.7629	6.14053	3.62802e-06	0.000270226	upreg
ENSMUSG00000019647	Sema6a	sema domain, transmembrane domain (TM), and cytoplasmic domain, (semaphorin) 6A	-0.160163	3.35374	0	0.999828	1	unchanged
ENSMUSG00000019659	Ccdc12	coiled-coil domain containing 12	0.209653	4.87473	0	0.999996	1	unchanged
ENSMUSG00000019689	Fmc1	formation of mitochondrial complex V assembly factor 1	-1.29191	6.30794	-2.31624	0.0160518	0.180658	unchanged
ENSMUSG00000019699	Akt3	thymoma viral proto-oncogene 3	1.50696	2.64247	1.98769	0.0308689	0.296996	unchanged
ENSMUSG00000019710	Mrpl24	mitochondrial ribosomal protein L24	-0.25786	6.25477	0	1	1	unchanged
ENSMUSG00000019715	Gle1	GLE1 RNA export mediator	-0.204493	4.54739	0	0.999969	1	unchanged
ENSMUSG00000019718	L3hypdh	L-3-hydroxyproline dehydratase (trans-)	-0.421403	3.77603	0	0.99301	1	unchanged
ENSMUSG00000019726	Lyst	lysosomal trafficking regulator	0.244583	2.09528	0	0.970253	1	unchanged
ENSMUSG00000019731	Slc35e1	solute carrier family 35, member E1	0.0648083	4.61978	0	0.999995	1	unchanged
ENSMUSG00000019734	Tmc4	transmembrane channel-like gene family 4	-0.976401	0.529066	0	0.519302	1	unchanged
ENSMUSG00000019737	Syne4	spectrin repeat containing, nuclear envelope family member 4	2.57787	2.27706	2.37498	0.0142454	0.166109	unchanged
ENSMUSG00000019738	Polr2i	polymerase (RNA) II (DNA directed) polypeptide I	-0.386002	6.11185	0	0.999938	1	unchanged
ENSMUSG00000019761	Krt10	keratin 10	-0.0222322	1.38012	0	0.998101	1	unchanged
ENSMUSG00000019762	Iyd	iodotyrosine deiodinase	-0.327919	6.81565	0	0.999993	1	unchanged
ENSMUSG00000019763	Rmnd1	required for meiotic nuclear division 1 homolog	-0.631739	3.33932	0	0.955917	1	unchanged
ENSMUSG00000019768	Esr1	estrogen receptor 1 (alpha)	0.662443	4.74642	0	0.891949	1	unchanged
ENSMUSG00000019773	Fbxo5	F-box protein 5	1.69792	0.993331	0.969201	0.173129	1	unchanged
ENSMUSG00000019774	Mtrf1l	mitochondrial translational release factor 1-like	-0.1925	2.7026	0	0.997257	1	unchanged
ENSMUSG00000019777	Hdac2	histone deacetylase 2	-0.00326796	3.92032	0	0.999999	1	unchanged
ENSMUSG00000019779	Frk	fyn-related kinase	-0.801835	2.30648	0	0.747132	1	unchanged
ENSMUSG00000019782	Rwdd1	RWD domain containing 1	0.0374994	2.90487	0	0.999908	1	unchanged
ENSMUSG00000019790	Stxbp5	syntaxin binding protein 5 (tomosyn)	0.215771	3.34007	0	0.999271	1	unchanged
ENSMUSG00000019791	Hint3	histidine triad nucleotide binding protein 3	-0.236342	4.88549	0	0.999983	1	unchanged
ENSMUSG00000019792	Trmt11	tRNA methyltransferase 11	0.424951	1.77362	0	0.922133	1	unchanged
ENSMUSG00000019794	Katna1	katanin p60 (ATPase-containing) subunit A1	0.192997	4.57398	0	0.999979	1	unchanged
ENSMUSG00000019795	Pcmt1	protein-L-isoaspartate (D-aspartate) O-methyltransferase 1	-0.245836	5.14586	0	0.999998	1	unchanged
ENSMUSG00000019796	Lrp11	low density lipoprotein receptor-related protein 11	0.762574	0.0404768	0	0.639058	1	unchanged
ENSMUSG00000019797	Mtres1	mitochondrial transcription rescue factor 1	-0.72613	3.99607	0	0.96417	1	unchanged
ENSMUSG00000019802	Sec63	SEC63 homolog, protein translocation regulator	-0.0895736	7.19627	0	1	1	unchanged
ENSMUSG00000019804	Snx3	sorting nexin 3	-0.400436	7.08419	0	0.999876	1	unchanged
ENSMUSG00000019806	Aig1	androgen-induced 1	0.753553	5.34709	0	0.928203	1	unchanged
ENSMUSG00000019808	Adat2	adenosine deaminase, tRNA-specific 2	0.373813	1.0589	0	0.939081	1	unchanged
ENSMUSG00000019809	Pex3	peroxisomal biogenesis factor 3	-0.229472	4.1926	0	0.999908	1	unchanged
ENSMUSG00000019810	Fuca2	fucosidase, alpha-L- 2, plasma	0.955028	3.2238	0	0.55725	1	unchanged
ENSMUSG00000019813	Cep57l1	centrosomal protein 57-like 1	0.180568	1.80161	0	0.992078	1	unchanged
ENSMUSG00000019814	Ltv1	LTV1 ribosome biogenesis factor	0.151998	3.86325	0	0.99947	1	unchanged
ENSMUSG00000019817	Plagl1	pleiomorphic adenoma gene-like 1	-0.105564	1.12507	0	0.978773	1	unchanged
ENSMUSG00000019818	Cd164	CD164 antigen	-0.0767195	7.9059	0	1	1	unchanged
ENSMUSG00000019820	Utrn	utrophin	-0.219776	5.05339	0	0.999896	1	unchanged
ENSMUSG00000019822	Smpd2	sphingomyelin phosphodiesterase 2, neutral	-0.403205	4.54067	0	0.999164	1	unchanged
ENSMUSG00000019823	Mical1	microtubule associated monooxygenase, calponin and LIM domain containing 1	1.02887	1.45547	0.0647889	0.47463	1	unchanged
ENSMUSG00000019826	Zbtb24	zinc finger and BTB domain containing 24	-0.613395	1.92748	0	0.872548	1	unchanged
ENSMUSG00000019831	Wasf1	WASP family, member 1	-1.53293	-0.0264756	-1.18751	0.124981	0.857657	unchanged
ENSMUSG00000019832	Rab32	RAB32, member RAS oncogene family	0.789777	6.11939	0	0.946891	1	unchanged
ENSMUSG00000019837	Gtf3c6	general transcription factor IIIC, polypeptide 6, alpha	-0.284445	4.655	0	0.999987	1	unchanged
ENSMUSG00000019838	Slc16a10	solute carrier family 16 (monocarboxylic acid transporters), member 10	-0.0699088	5.76783	0	0.999967	1	unchanged
ENSMUSG00000019841	Rev3l	REV3 like, DNA directed polymerase zeta catalytic subunit	-0.290855	3.0963	0	0.997596	1	unchanged
ENSMUSG00000019842	Traf3ip2	TRAF3 interacting protein 2	0.46997	1.60853	0	0.900223	1	unchanged
ENSMUSG00000019843	Fyn	Fyn proto-oncogene	1.09287	3.76741	0.369692	0.357889	1	unchanged
ENSMUSG00000019845	Tube1	tubulin, epsilon 1	-1.43504	-0.695502	-0.554403	0.295923	1	unchanged
ENSMUSG00000019846	Lama4	laminin, alpha 4	0.212	1.27248	0	0.979418	1	unchanged
ENSMUSG00000019849	Prep	prolyl endopeptidase	-0.352896	4.4177	0	0.999879	1	unchanged
ENSMUSG00000019850	Tnfaip3	tumor necrosis factor, alpha-induced protein 3	3.33139	1.70456	2.94512	0.00423028	0.0653476	unchanged
ENSMUSG00000019851	Perp	PERP, TP53 apoptosis effector	-0.645426	5.65656	0	0.989451	1	unchanged
ENSMUSG00000019853	Hebp2	heme binding protein 2	2.17269	1.05743	1.82713	0.0419157	0.374221	unchanged
ENSMUSG00000019854	Reps1	RalBP1 associated Eps domain containing protein	-0.0427289	3.34654	0	0.999988	1	unchanged
ENSMUSG00000019857	Asf1a	anti-silencing function 1A histone chaperone	0.322626	2.79039	0	0.9942	1	unchanged
ENSMUSG00000019861	Gopc	golgi associated PDZ and coiled-coil motif containing	-0.223242	4.35462	0	0.999929	1	unchanged
ENSMUSG00000019863	Qrsl1	glutaminyl-tRNA synthase (glutamine-hydrolyzing)-like 1	-0.0983444	3.23565	0	0.999884	1	unchanged
ENSMUSG00000019864	Rtn4ip1	reticulon 4 interacting protein 1	-0.874161	3.72185	0	0.754595	1	unchanged
ENSMUSG00000019866	Crybg1	crystallin beta-gamma domain containing 1	1.49617	4.90239	2.66371	0.0077544	0.103507	unchanged
ENSMUSG00000019868	Vta1	vesicle (multivesicular body) trafficking 1	0.061287	3.84783	0	0.999995	1	unchanged
ENSMUSG00000019872	Smpdl3a	sphingomyelin phosphodiesterase, acid-like 3A	0.733887	5.69837	0	0.96621	1	unchanged
ENSMUSG00000019873	Reep3	receptor accessory protein 3	-0.447112	6.59744	0	0.999972	1	unchanged
ENSMUSG00000019874	Fabp7	fatty acid binding protein 7, brain	1.86869	1.79117	1.56267	0.0675038	0.541092	unchanged
ENSMUSG00000019876	Pkib	protein kinase inhibitor beta, cAMP dependent, testis specific	3.47386	1.50091	3.8237	0.000590501	0.0145518	upreg
ENSMUSG00000019877	Serinc1	serine incorporator 1	-0.00172313	6.19073	0	1	1	unchanged
ENSMUSG00000019878	Hsf2	heat shock factor 2	-0.513361	4.6085	0	0.993236	1	unchanged
ENSMUSG00000019880	Rspo3	R-spondin 3	0.157217	3.66463	0	0.999853	1	unchanged
ENSMUSG00000019883	Echdc1	enoyl Coenzyme A hydratase domain containing 1	-1.46273	4.80049	-2.91634	0.00448943	0.0676373	unchanged
ENSMUSG00000019889	Ptprk	protein tyrosine phosphatase receptor type K	-0.346338	5.41288	0	0.999704	1	unchanged
ENSMUSG00000019891	Dcbld1	discoidin, CUB and LCCL domain containing 1	0.0872577	2.61797	0	0.99977	1	unchanged
ENSMUSG00000019897	Ccdc59	coiled-coil domain containing 59	0.333758	4.57072	0	0.999941	1	unchanged
ENSMUSG00000019899	Lama2	laminin, alpha 2	-0.51214	-0.335635	0	0.787059	1	unchanged
ENSMUSG00000019906	Lin7a	lin-7 homolog A, crumbs cell polarity complex component	-0.662497	4.13075	0	0.928177	1	unchanged
ENSMUSG00000019907	Ppp1r12a	protein phosphatase 1, regulatory subunit 12A	0.286811	5.5449	0	0.999997	1	unchanged
ENSMUSG00000019916	P4ha1	procollagen-proline, 2-oxoglutarate 4-dioxygenase (proline 4-hydroxylase), alpha 1 polypeptide	-0.730387	3.71972	0	0.827385	1	unchanged
ENSMUSG00000019917	Septin10	septin 10	0.224573	3.54893	0	0.999629	1	unchanged
ENSMUSG00000019920	Lims1	LIM and senescent cell antigen-like domains 1	0.294343	3.76504	0	0.998343	1	unchanged
ENSMUSG00000019923	Zwint	ZW10 interactor	-0.00226766	5.72942	0	1	1	unchanged
ENSMUSG00000019927	Ube2d1	ubiquitin-conjugating enzyme E2D 1	0.207183	2.46584	0	0.997389	1	unchanged
ENSMUSG00000019929	Dcn	decorin	0.398882	8.16378	0	0.999992	1	unchanged
ENSMUSG00000019935	Slc17a8	solute carrier family 17 (sodium-dependent inorganic phosphate cotransporter), member 8	-1.23492	2.39874	-0.767357	0.22624	1	unchanged
ENSMUSG00000019942	Cdk1	cyclin dependent kinase 1	2.31229	3.76916	2.42731	0.0127701	0.152528	unchanged
ENSMUSG00000019943	Atp2b1	ATPase, Ca++ transporting, plasma membrane 1	0.631029	6.40137	0	0.998991	1	unchanged
ENSMUSG00000019944	Rhobtb1	Rho-related BTB domain containing 1	-0.453799	5.36172	0	0.999206	1	unchanged
ENSMUSG00000019945	Cabcoco1	ciliary associated calcium binding coiled-coil 1	0.560301	-0.892606	0	0.749004	1	unchanged
ENSMUSG00000019947	Arid5b	AT-rich interaction domain 5B	-0.578478	5.90426	0	0.978868	1	unchanged
ENSMUSG00000019948	Actr6	ARP6 actin-related protein 6	-0.148331	2.99241	0	0.998506	1	unchanged
ENSMUSG00000019951	Bltp3b	bridge-like lipid transfer protein family member 3B	0.058349	6.19279	0	1	1	unchanged
ENSMUSG00000019952	Poc1b	POC1 centriolar protein B	-0.147742	2.75271	0	0.997932	1	unchanged
ENSMUSG00000019960	Dusp6	dual specificity phosphatase 6	0.129572	6.11358	0	0.996853	1	unchanged
ENSMUSG00000019961	Tmpo	thymopoietin	0.422463	5.7188	0	0.999948	1	unchanged
ENSMUSG00000019966	Kitl	kit ligand	0.499193	1.72035	0	0.889478	1	unchanged
ENSMUSG00000019969	Psen1	presenilin 1	0.772167	4.88998	0	0.930853	1	unchanged
ENSMUSG00000019970	Sgk1	serum/glucocorticoid regulated kinase 1	0.731207	4.30093	0	0.850115	1	unchanged
ENSMUSG00000019971	Cep290	centrosomal protein 290	0.857829	2.80079	0	0.681843	1	unchanged
ENSMUSG00000019975	Ikbip	IKBKB interacting protein	0.201276	2.39844	0	0.997399	1	unchanged
ENSMUSG00000019977	Hbs1l	Hbs1-like (S. cerevisiae)	-0.389297	5.21445	0	0.999936	1	unchanged
ENSMUSG00000019978	Epb41l2	erythrocyte membrane protein band 4.1 like 2	0.450988	4.91289	0	0.989078	1	unchanged
ENSMUSG00000019979	Apaf1	apoptotic peptidase activating factor 1	1.447	2.18169	1.18756	0.124962	0.857657	unchanged
ENSMUSG00000019984	Med23	mediator complex subunit 23	0.0517611	3.09148	0	0.999834	1	unchanged
ENSMUSG00000019986	Ahi1	Abelson helper integration site 1	-0.0650425	1.1046	0	0.997695	1	unchanged
ENSMUSG00000019987	Arg1	arginase, liver	0.157364	10.0841	0	0.999896	1	unchanged
ENSMUSG00000019988	Nedd1	neural precursor cell expressed, developmentally down-regulated gene 1	0.393708	2.70941	0	0.982661	1	unchanged
ENSMUSG00000019989	Enpp3	ectonucleotide pyrophosphatase/phosphodiesterase 3	-0.474425	4.35686	0	0.988762	1	unchanged
ENSMUSG00000019990	Pde7b	phosphodiesterase 7B	0.787571	0.0937009	0	0.652689	1	unchanged
ENSMUSG00000019992	Mtfr2	mitochondrial fission regulator 2	2.81012	-0.927485	1.90618	0.0364671	0.335751	unchanged
ENSMUSG00000019996	Map7	microtubule-associated protein 7	-1.04041	4.3007	-0.27496	0.393186	1	unchanged
ENSMUSG00000019997	Ccn2	cellular communication network factor 2	0.012598	2.29371	0	0.995272	1	unchanged
ENSMUSG00000019998	Stx7	syntaxin 7	0.537618	5.05331	0	0.997181	1	unchanged
ENSMUSG00000020003	Pex7	peroxisomal biogenesis factor 7	-0.49298	4.69435	0	0.991223	1	unchanged
ENSMUSG00000020009	Ifngr1	interferon gamma receptor 1	1.42314	5.20779	1.99056	0.0306984	0.295785	unchanged
ENSMUSG00000020010	Vnn3	vanin 3	-0.347134	5.92919	0	0.998633	1	unchanged
ENSMUSG00000020015	Cdk17	cyclin dependent kinase 17	-0.241962	3.99472	0	0.998995	1	unchanged
ENSMUSG00000020017	Hal	histidine ammonia lyase	-0.791996	7.82251	0	0.861422	1	unchanged
ENSMUSG00000020018	Snrpf	small nuclear ribonucleoprotein polypeptide F	0.102232	2.77458	0	0.971319	1	unchanged
ENSMUSG00000020019	Ntn4	netrin 4	0.423584	1.97841	0	0.940337	1	unchanged
ENSMUSG00000020021	Fgd6	FYVE, RhoGEF and PH domain containing 6	-1.06599	3.1688	-0.279237	0.391569	1	unchanged
ENSMUSG00000020022	Ndufa12	NADH:ubiquinone oxidoreductase subunit A12	-0.661994	6.64413	0	0.993702	1	unchanged
ENSMUSG00000020023	Tmcc3	transmembrane and coiled coil domains 3	0.00391081	4.58244	0	1	1	unchanged
ENSMUSG00000020024	Cep83	centrosomal protein 83	-0.206956	2.29524	0	0.991285	1	unchanged
ENSMUSG00000020027	Socs2	suppressor of cytokine signaling 2	-0.347928	5.01113	0	0.923874	1	unchanged
ENSMUSG00000020029	Nudt4	nudix hydrolase 4	-0.00610538	7.2749	0	1	1	unchanged
ENSMUSG00000020032	Nuak1	NUAK family, SNF1-like kinase, 1	0.0766174	3.01718	0	0.996777	1	unchanged
ENSMUSG00000020034	Tcp11l2	t-complex 11 (mouse) like 2	0.168172	2.52206	0	0.986115	1	unchanged
ENSMUSG00000020038	Cry1	cryptochrome circadian regulator 1	-1.87418	3.74279	-3.14687	0.00270078	0.0455878	downreg
ENSMUSG00000020042	Abtb3	ankyrin repeat and BTB domain containing 3	1.41228	1.37249	0.891582	0.192017	1	unchanged
ENSMUSG00000020044	Timp3	tissue inhibitor of metalloproteinase 3	0.726907	5.8365	0	0.859585	1	unchanged
ENSMUSG00000020048	Hsp90b1	heat shock protein 90, beta (Grp94), member 1	0.106698	9.55694	0	0.999957	1	unchanged
ENSMUSG00000020051	Pah	phenylalanine hydroxylase	-1.4871	8.2988	-3.53484	0.00113285	0.0238402	downreg
ENSMUSG00000020053	Igf1	insulin-like growth factor 1	-0.644903	9.66064	0	0.995544	1	unchanged
ENSMUSG00000020056	Washc3	WASH complex subunit 3	-0.107473	4.5686	0	0.999944	1	unchanged
ENSMUSG00000020057	Dram1	DNA-damage regulated autophagy modulator 1	5.28707	2.58091	5.25166	2.43219e-05	0.00118166	upreg
ENSMUSG00000020063	Sirt1	sirtuin 1	0.110098	2.83319	0	0.99983	1	unchanged
ENSMUSG00000020064	Herc4	hect domain and RLD 4	-0.181398	5.4172	0	0.99999	1	unchanged
ENSMUSG00000020069	Hnrnph3	heterogeneous nuclear ribonucleoprotein H3	-0.798934	4.28547	0	0.87937	1	unchanged
ENSMUSG00000020070	Rufy2	RUN and FYVE domain-containing 2	0.189838	1.9051	0	0.993088	1	unchanged
ENSMUSG00000020072	Pbld2	phenazine biosynthesis-like protein domain containing 2	-0.528173	6.69322	0	0.999004	1	unchanged
ENSMUSG00000020074	Ccar1	cell division cycle and apoptosis regulator 1	0.17372	6.30896	0	0.999996	1	unchanged
ENSMUSG00000020075	Ddx21	DExD box helicase 21	0.528695	5.53899	0	0.999758	1	unchanged
ENSMUSG00000020076	Ddx50	DExD box helicase 50	-0.335234	5.11377	0	0.999959	1	unchanged
ENSMUSG00000020077	Srgn	serglycin	2.44233	5.52297	7.5205	2.34044e-07	2.92732e-05	upreg
ENSMUSG00000020078	Vps26a	VPS26 retromer complex component A	0.0409246	4.93488	0	0.999999	1	unchanged
ENSMUSG00000020079	Supv3l1	suppressor of var1, 3-like 1 (S. cerevisiae)	-0.466382	3.30962	0	0.997197	1	unchanged
ENSMUSG00000020083	Fam241b	family with sequence similarity 241, member B	-1.20787	0.219286	-0.418964	0.340159	1	unchanged
ENSMUSG00000020085	Aifm2	apoptosis-inducing factor, mitochondrion-associated 2	0.671369	4.65291	0	0.962816	1	unchanged
ENSMUSG00000020087	Tysnd1	trypsin domain containing 1	-0.404063	5.48291	0	0.999407	1	unchanged
ENSMUSG00000020088	Sar1a	secretion associated Ras related GTPase 1A	0.336188	6.3016	0	0.999996	1	unchanged
ENSMUSG00000020089	Ppa1	pyrophosphatase (inorganic) 1	0.220025	8.24306	0	0.999998	1	unchanged
ENSMUSG00000020091	Eif4ebp2	eukaryotic translation initiation factor 4E binding protein 2	-0.770065	3.39647	0	0.777542	1	unchanged
ENSMUSG00000020092	Pald1	phosphatase domain containing, paladin 1	0.423292	2.30167	0	0.971353	1	unchanged
ENSMUSG00000020097	Sgpl1	sphingosine phosphate lyase 1	-0.284787	5.9611	0	0.999996	1	unchanged
ENSMUSG00000020098	Pcbd1	pterin 4 alpha carbinolamine dehydratase/dimerization cofactor of hepatocyte nuclear factor 1 alpha (TCF1) 1	-0.756406	7.96961	0	0.969922	1	unchanged
ENSMUSG00000020099	Unc5b	unc-5 netrin receptor B	-1.04702	2.16602	-0.167291	0.434472	1	unchanged
ENSMUSG00000020100	Slc29a3	solute carrier family 29 (nucleoside transporters), member 3	1.01262	3.59401	0.0433604	0.482938	1	unchanged
ENSMUSG00000020101	Vsir	V-set immunoregulatory receptor	1.93967	4.38053	3.6848	0.0008075	0.0184902	upreg
ENSMUSG00000020102	Slc16a7	solute carrier family 16 (monocarboxylic acid transporters), member 7	-0.278648	4.02029	0	0.99826	1	unchanged
ENSMUSG00000020105	Lrig3	leucine-rich repeats and immunoglobulin-like domains 3	-0.262848	3.39116	0	0.993947	1	unchanged
ENSMUSG00000020107	Anapc16	anaphase promoting complex subunit 16	-0.199493	4.81577	0	0.999999	1	unchanged
ENSMUSG00000020108	Ddit4	DNA-damage-inducible transcript 4	1.32902	5.01005	0.941109	0.179344	1	unchanged
ENSMUSG00000020109	Dnajb12	DnaJ heat shock protein family (Hsp40) member B12	-0.30807	4.64123	0	0.999867	1	unchanged
ENSMUSG00000020111	Micu1	mitochondrial calcium uptake 1	-0.0911638	4.02536	0	0.999989	1	unchanged
ENSMUSG00000020114	Cand1	cullin associated and neddylation disassociated 1	0.118073	5.20209	0	0.999999	1	unchanged
ENSMUSG00000020115	Tbk1	TANK-binding kinase 1	0.524622	4.01223	0	0.992356	1	unchanged
ENSMUSG00000020116	Pno1	partner of NOB1 homolog	-0.335107	4.75508	0	0.999627	1	unchanged
ENSMUSG00000020120	Plek	pleckstrin	3.61941	4.26438	6.9709	6.76242e-07	7.00438e-05	upreg
ENSMUSG00000020121	Srgap1	SLIT-ROBO Rho GTPase activating protein 1	0.382233	1.63108	0	0.942755	1	unchanged
ENSMUSG00000020122	Egfr	epidermal growth factor receptor	0.859049	8.04105	0	0.776999	1	unchanged
ENSMUSG00000020123	Avpr1a	arginine vasopressin receptor 1A	-0.433605	5.08396	0	0.991326	1	unchanged
ENSMUSG00000020124	Usp15	ubiquitin specific peptidase 15	0.18168	3.94919	0	0.999547	1	unchanged
ENSMUSG00000020125	Elane	elastase, neutrophil expressed	5.31306	-0.495693	2.03452	0.0321112	0.307165	unchanged
ENSMUSG00000020128	Vps54	VPS54 GARP complex subunit	-0.0196244	3.74243	0	0.999992	1	unchanged
ENSMUSG00000020130	Tbc1d15	TBC1 domain family, member 15	-0.0981179	4.96379	0	0.999994	1	unchanged
ENSMUSG00000020131	Pcsk4	proprotein convertase subtilisin/kexin type 4	-0.208352	2.46442	0	0.998898	1	unchanged
ENSMUSG00000020132	Rab21	RAB21, member RAS oncogene family	0.0516444	4.55194	0	0.999999	1	unchanged
ENSMUSG00000020133	2310011J03Rik	RIKEN cDNA 2310011J03 gene	0.398459	3.83046	0	0.999819	1	unchanged
ENSMUSG00000020134	Peli1	pellino 1	-0.147806	5.46379	0	0.999999	1	unchanged
ENSMUSG00000020137	Thap2	THAP domain containing, apoptosis associated protein 2	0.473447	2.03331	0	0.90487	1	unchanged
ENSMUSG00000020140	Lgr5	leucine rich repeat containing G protein coupled receptor 5	-1.18301	2.444	-0.549622	0.294553	1	unchanged
ENSMUSG00000020142	Slc1a4	solute carrier family 1 (glutamate/neutral amino acid transporter), member 4	1.38844	4.13312	0.959358	0.174835	1	unchanged
ENSMUSG00000020143	Dock2	dedicator of cyto-kinesis 2	2.76555	4.01618	4.57254	0.000108745	0.00389661	upreg
ENSMUSG00000020149	Rab1a	RAB1A, member RAS oncogene family	-0.0234587	6.80914	0	1	1	unchanged
ENSMUSG00000020150	Gamt	guanidinoacetate methyltransferase	-1.0569	7.16774	-0.381414	0.353604	1	unchanged
ENSMUSG00000020152	Actr2	actin related protein 2	0.156801	6.13233	0	0.999998	1	unchanged
ENSMUSG00000020153	Ndufs7	NADH:ubiquinone oxidoreductase core subunit S7	-0.827944	6.48615	0	0.933446	1	unchanged
ENSMUSG00000020154	Ptprb	protein tyrosine phosphatase receptor type B	-0.452161	5.57787	0	0.99982	1	unchanged
ENSMUSG00000020156	Pwwp3a	PWWP domain containing 3A, DNA repair factor	-0.25723	2.58361	0	0.996855	1	unchanged
ENSMUSG00000020160	Meis1	Meis homeobox 1	-0.109405	2.44824	0	0.995929	1	unchanged
ENSMUSG00000020163	Uqcr11	ubiquinol-cytochrome c reductase, complex III subunit XI	-0.804757	7.56393	0	0.912733	1	unchanged
ENSMUSG00000020166	Cnot2	CCR4-NOT transcription complex, subunit 2	0.11445	4.37096	0	0.999963	1	unchanged
ENSMUSG00000020167	Tcf3	transcription factor 3	0.474665	3.40876	0	0.990507	1	unchanged
ENSMUSG00000020170	Frs2	fibroblast growth factor receptor substrate 2	-0.103194	2.09033	0	0.996811	1	unchanged
ENSMUSG00000020171	Yeats4	YEATS domain containing 4	0.369438	5.46027	0	0.999981	1	unchanged
ENSMUSG00000020173	Cobl	cordon-bleu WH2 repeat	0.440402	4.09319	0	0.996044	1	unchanged
ENSMUSG00000020175	Rab36	RAB36, member RAS oncogene family	0.733224	-0.38529	0	0.653509	1	unchanged
ENSMUSG00000020176	Grb10	growth factor receptor bound protein 10	0.516877	1.46047	0	0.919122	1	unchanged
ENSMUSG00000020178	Adora2a	adenosine A2a receptor	0.716125	0.560137	0	0.701311	1	unchanged
ENSMUSG00000020180	Snrpd3	small nuclear ribonucleoprotein D3	-0.145841	5.40163	0	0.999979	1	unchanged
ENSMUSG00000020182	Ddc	dopa decarboxylase	-2.12621	6.13469	-5.85943	6.53985e-06	0.000410926	downreg
ENSMUSG00000020183	Cpm	carboxypeptidase M	0.246135	1.54114	0	0.98425	1	unchanged
ENSMUSG00000020184	Mdm2	transformed mouse 3T3 cell double minute 2	0.391544	5.66513	0	0.999714	1	unchanged
ENSMUSG00000020185	E2f7	E2F transcription factor 7	1.57715	1.25389	1.35793	0.0953525	0.700379	unchanged
ENSMUSG00000020186	Csrp2	cysteine and glycine-rich protein 2	-0.227829	5.79338	0	0.99998	1	unchanged
ENSMUSG00000020189	Osbpl8	oxysterol binding protein-like 8	-0.843265	4.35485	0	0.822749	1	unchanged
ENSMUSG00000020190	Mknk2	MAP kinase-interacting serine/threonine kinase 2	-0.291023	5.63861	0	0.998077	1	unchanged
ENSMUSG00000020196	Cabin1	calcineurin binding protein 1	0.587916	4.0752	0	0.97741	1	unchanged
ENSMUSG00000020198	Ap3d1	adaptor-related protein complex 3, delta 1 subunit	0.17273	6.1852	0	1	1	unchanged
ENSMUSG00000020205	Phlda1	pleckstrin homology like domain, family A, member 1	-2.11184	6.76797	-3.62741	0.000919322	0.0205192	downreg
ENSMUSG00000020211	Sf3a2	splicing factor 3a, subunit 2	0.190519	3.03223	0	0.990771	1	unchanged
ENSMUSG00000020219	Timm13	translocase of inner mitochondrial membrane 13	-0.499542	6.32723	0	0.999257	1	unchanged
ENSMUSG00000020220	Vps13d	vacuolar protein sorting 13D	-0.205269	4.98046	0	0.999998	1	unchanged
ENSMUSG00000020224	Llph	LLP homolog, long-term synaptic facilitation (Aplysia)	-0.0704573	4.20131	0	0.999997	1	unchanged
ENSMUSG00000020225	Tmbim4	transmembrane BAX inhibitor motif containing 4	0.0277361	6.78785	0	1	1	unchanged
ENSMUSG00000020227	Irak3	interleukin-1 receptor-associated kinase 3	3.69602	2.04356	2.8108	0.00570234	0.0817315	unchanged
ENSMUSG00000020228	Helb	helicase (DNA) B	0.144652	3.29769	0	0.999224	1	unchanged
ENSMUSG00000020230	Prmt2	protein arginine N-methyltransferase 2	0.437803	1.72221	0	0.929013	1	unchanged
ENSMUSG00000020231	Dip2a	disco interacting protein 2 homolog A	-0.166802	1.11043	0	0.981654	1	unchanged
ENSMUSG00000020232	Hmg20b	high mobility group 20B	-0.0643118	4.47189	0	0.999995	1	unchanged
ENSMUSG00000020235	Fzr1	fizzy and cell division cycle 20 related 1	0.223341	4.0786	0	0.999885	1	unchanged
ENSMUSG00000020238	Ncln	nicalin	-0.00719189	5.45155	0	1	1	unchanged
ENSMUSG00000020241	Col6a2	collagen, type VI, alpha 2	-0.313528	1.75255	0	0.946169	1	unchanged
ENSMUSG00000020246	Hcfc2	host cell factor C2	-0.0313813	3.93166	0	0.999994	1	unchanged
ENSMUSG00000020248	Nfyb	nuclear transcription factor-Y beta	-0.456734	5.63967	0	0.999828	1	unchanged
ENSMUSG00000020250	Txnrd1	thioredoxin reductase 1	0.0589636	6.26512	0	0.999998	1	unchanged
ENSMUSG00000020253	Ppm1m	protein phosphatase 1M	-0.0709105	4.04322	0	0.999696	1	unchanged
ENSMUSG00000020255	Nopchap1	NOP protein chaperone 1	0.318964	4.04774	0	0.999884	1	unchanged
ENSMUSG00000020257	Wdr82	WD repeat domain containing 82	0.121921	4.49145	0	0.999977	1	unchanged
ENSMUSG00000020258	Glyctk	glycerate kinase	-0.515584	7.52124	0	0.998497	1	unchanged
ENSMUSG00000020260	Pofut2	protein O-fucosyltransferase 2	0.258466	4.21923	0	0.999835	1	unchanged
ENSMUSG00000020261	Slc36a1	solute carrier family 36 (proton/amino acid symporter), member 1	0.261331	5.44026	0	0.999345	1	unchanged
ENSMUSG00000020262	Adarb1	adenosine deaminase, RNA-specific, B1	-0.140484	2.44146	0	0.998267	1	unchanged
ENSMUSG00000020263	Appl2	adaptor protein, phosphotyrosine interaction, PH domain and leucine zipper containing 2	-0.210363	3.70316	0	0.999576	1	unchanged
ENSMUSG00000020265	Sumo3	small ubiquitin-like modifier 3	-0.338016	8.06046	0	0.99992	1	unchanged
ENSMUSG00000020267	Hint1	histidine triad nucleotide binding protein 1	-0.188754	8.98525	0	1	1	unchanged
ENSMUSG00000020268	Lyrm7	LYR motif containing 7	-0.919401	0.725149	0	0.581368	1	unchanged
ENSMUSG00000020271	Fbxw11	F-box and WD-40 domain protein 11	0.0909868	4.78935	0	0.999998	1	unchanged
ENSMUSG00000020272	Stk10	serine/threonine kinase 10	2.45915	2.65292	3.74422	0.000705985	0.0167023	upreg
ENSMUSG00000020273	Papolg	poly(A) polymerase gamma	0.425649	1.62534	0	0.937646	1	unchanged
ENSMUSG00000020275	Rel	reticuloendotheliosis oncogene	1.44973	2.03987	1.03743	0.156414	1	unchanged
ENSMUSG00000020277	Pfkl	phosphofructokinase, liver, B-type	0.284749	4.98305	0	0.998003	1	unchanged
ENSMUSG00000020280	Pus10	pseudouridylate synthase 10	0.15122	3.07082	0	0.9977	1	unchanged
ENSMUSG00000020282	Rhbdf1	rhomboid 5 homolog 1	0.201019	2.3222	0	0.991255	1	unchanged
ENSMUSG00000020283	Pex13	peroxisomal biogenesis factor 13	-0.391663	4.64818	0	0.999821	1	unchanged
ENSMUSG00000020284	Cfap410	cilia and flagella associated protein 410	0.556827	2.51168	0	0.961374	1	unchanged
ENSMUSG00000020287	Mpg	N-methylpurine-DNA glycosylase	0.219962	3.8747	0	0.999972	1	unchanged
ENSMUSG00000020288	Ahsa2	AHA1, activator of heat shock protein ATPase 2	-0.811323	4.87683	0	0.844851	1	unchanged
ENSMUSG00000020289	Nprl3	nitrogen permease regulator-like 3	-0.383671	2.74466	0	0.972448	1	unchanged
ENSMUSG00000020290	Xpo1	exportin 1	-0.00121948	4.9705	0	1	1	unchanged
ENSMUSG00000020300	Cpeb4	cytoplasmic polyadenylation element binding protein 4	-0.127539	4.80851	0	0.99935	1	unchanged
ENSMUSG00000020305	Asb3	ankyrin repeat and SOCS box-containing 3	-0.230154	2.96521	0	0.998071	1	unchanged
ENSMUSG00000020307	Cdc34	cell division cycle 34	-0.21294	6.55393	0	1	1	unchanged
ENSMUSG00000020308	Tpgs1	tubulin polyglutamylase complex subunit 1	0.0615648	4.26221	0	0.999993	1	unchanged
ENSMUSG00000020309	Chac2	ChaC, cation transport regulator 2	-0.593218	2.21109	0	0.948275	1	unchanged
ENSMUSG00000020311	Erlec1	endoplasmic reticulum lectin 1	0.649839	4.62351	0	0.988064	1	unchanged
ENSMUSG00000020315	Sptbn1	spectrin beta, non-erythrocytic 1	0.124328	6.39995	0	1	1	unchanged
ENSMUSG00000020319	Wdpcp	WD repeat containing planar cell polarity effector	0.0254925	-0.0920486	0	0.994638	1	unchanged
ENSMUSG00000020321	Mdh1	malate dehydrogenase 1, NAD (soluble)	-0.875793	8.72533	0	0.842193	1	unchanged
ENSMUSG00000020325	Fstl3	follistatin-like 3	1.58987	1.20879	0.914524	0.186442	1	unchanged
ENSMUSG00000020326	Ccng1	cyclin G1	0.0601052	5.04398	0	0.999998	1	unchanged
ENSMUSG00000020328	Nudcd2	NudC domain containing 2	-0.114177	5.34286	0	1	1	unchanged
ENSMUSG00000020329	Polrmt	polymerase (RNA) mitochondrial (DNA directed)	-0.360339	3.71165	0	0.997603	1	unchanged
ENSMUSG00000020330	Hmmr	hyaluronan mediated motility receptor (RHAMM)	3.56022	1.89302	2.75812	0.00638217	0.0887878	unchanged
ENSMUSG00000020334	Slc22a4	solute carrier family 22 (organic cation transporter), member 4	-0.855752	-0.739453	0	0.586462	1	unchanged
ENSMUSG00000020340	Cyfip2	cytoplasmic FMR1 interacting protein 2	3.51334	2.5902	4.15073	0.000281559	0.00824043	upreg
ENSMUSG00000020346	Mgat1	mannoside acetylglucosaminyltransferase 1	0.0451791	6.13365	0	1	1	unchanged
ENSMUSG00000020349	Ppp2ca	protein phosphatase 2 (formerly 2A), catalytic subunit, alpha isoform	-0.0597887	6.64958	0	1	1	unchanged
ENSMUSG00000020357	Flt4	FMS-like tyrosine kinase 4	1.10456	4.76359	0.596201	0.279106	1	unchanged
ENSMUSG00000020358	Hnrnpab	heterogeneous nuclear ribonucleoprotein A/B	0.0108092	7.24415	0	1	1	unchanged
ENSMUSG00000020359	Phykpl	5-phosphohydroxy-L-lysine phospholyase	0.146768	3.76477	0	0.999819	1	unchanged
ENSMUSG00000020361	Hspa4	heat shock protein 4	-0.347651	6.99799	0	0.999991	1	unchanged
ENSMUSG00000020362	Cnot6	CCR4-NOT transcription complex, subunit 6	0.0231539	5.62794	0	1	1	unchanged
ENSMUSG00000020363	Gfpt2	glutamine fructose-6-phosphate transaminase 2	3.34713	-0.902902	2.98219	0.00389937	0.0610364	unchanged
ENSMUSG00000020364	Zfp354a	zinc finger protein 354A	-1.37605	0.92945	-1.03636	0.156647	1	unchanged
ENSMUSG00000020366	Mapk9	mitogen-activated protein kinase 9	-0.22514	5.07563	0	0.999994	1	unchanged
ENSMUSG00000020368	Canx	calnexin	-0.0848682	7.99382	0	1	1	unchanged
ENSMUSG00000020372	Rack1	receptor for activated C kinase 1	0.237126	8.76865	0	1	1	unchanged
ENSMUSG00000020375	Rufy1	RUN and FYVE domain containing 1	0.030195	3.89082	0	0.999999	1	unchanged
ENSMUSG00000020376	Rnf130	ring finger protein 130	-0.189884	3.97891	0	0.993974	1	unchanged
ENSMUSG00000020377	Ltc4s	leukotriene C4 synthase	1.98295	0.291122	1.39181	0.0904216	0.672373	unchanged
ENSMUSG00000020380	Rad50	RAD50 double strand break repair protein	0.564467	4.17216	0	0.98834	1	unchanged
ENSMUSG00000020381	Mrnip	MRN complex interacting protein	-0.836759	2.23875	0	0.696769	1	unchanged
ENSMUSG00000020385	Clk4	CDC like kinase 4	0.163764	4.17647	0	0.999998	1	unchanged
ENSMUSG00000020386	Sar1b	secretion associated Ras related GTPase 1B	-0.779531	7.24685	0	0.923752	1	unchanged
ENSMUSG00000020387	Jade2	jade family PHD finger 2	0.866008	4.20061	0	0.747941	1	unchanged
ENSMUSG00000020388	Pdlim4	PDZ and LIM domain 4	2.34505	2.66711	3.18419	0.0024859	0.0425814	upreg
ENSMUSG00000020390	Ube2b	ubiquitin-conjugating enzyme E2B	-0.48339	6.14264	0	0.999757	1	unchanged
ENSMUSG00000020392	Cdkn2aipnl	CDKN2A interacting protein N-terminal like	0.400154	3.79153	0	0.99659	1	unchanged
ENSMUSG00000020393	Kremen1	kringle containing transmembrane protein 1	0.218287	2.30777	0	0.981488	1	unchanged
[truncated: 11,376 more rows]

## Sheet: NI_D22
Ensembl_ID	gene_symbol	gene_name	logFC	AveExpr	t	P.Value	adj.P.Val	Status
[truncated: 13,258 more rows]

[truncated: 5 more sheets: D6_D10, D6-D22, D10_D22, NIvsInfected-Merged, Infected-Merged]
