# Supplementary material for: Direct suppression of host gluconeogenesis by Trypanosoma brucei
Source: Research Square preprint supplement (doi:10.21203/rs.3.rs-8369960/v1), 2026-01-13
Supplement: Supplementary file 2 [file 6ea370af14aceea54b7f9a89.xlsx]

## Sheet: Sheet1
	Gene	Forward	Reverse
	Glucose-6-phosphatase (G6pc)	CCTCCTCAGCCTATGTCTGC	AACATCGGAGTGACCTTTGG
	Phosphoenolpyruvate carboxykinase 1 (Pck1)	AACCCATGCAAAGTCTACGG	CTGTGGGCCAGAGAGTTAGG
	Glyceraldehyde-3-phosphate dehydrogenase (Gapdh)	AGGTCGGTGTGAACGGATTTG	GGGGTCGTTGATGGCAACA
